# Supplementary material for: Fangorn Forest (F2): a machine learning approach to classify genes and genera in the family Geminiviridae
Source: PubMed Central journal article supplement (PMC5622471; doi:10.1186/s12859-017-1839-x), 2017-09-30
Supplement: 12859_2017_1839_MOESM6_ESM.pdf [file 12859_2017_1839_MOESM6_ESM.pdf]

# Charts of genus and ORF attributes

- Family attributes
  - Proportion of Guanine in the genome
  - Proportion of Guanine in region 1
  - Proportion of Guanine in region 2
  - Proportion of Guanine in region 3
  - Proportion of Guanine in region 4
  - Proportion of Adenine in the genome
  - Proportion of Adenine in region 1
  - Proportion of Adenine in region 2
  - Proportion of Adenine in region 3
  - Proportion of Adenine in region 4
  - Proportion of Thymine in the genome
  - Proportion of Thymine in region 1
  - Proportion of Thymine in region 2
  - Proportion of Thymine in region 3
  - Proportion of Thymine in region 4
  - Proportion of Cytosine in the genome
  - Proportion of Cytosine in region 1
  - Proportion of Cytosine in region 2
  - Proportion of Cytosine in region 3
  - Proportion of Cytosine in region 4
  - Proportion of Guanine and Cytosine in region 1
  - Proportion of Guanine and Cytosine in region 2
  - Proportion of Guanine and Cytosine in region 3
  - Proportion of Guanine and Cytosine in region 4
- Genus attributes
  - Proportion of Guanine in the genome
  - Proportion of Guanine in region 1
  - Proportion of Guanine in region 2
  - Proportion of Guanine in region 3
  - Proportion of Guanine in region 4
  - Proportion of Adenine in the genome
  - Proportion of Adenine in region 1
  - Proportion of Adenine in region 2
  - Proportion of Adenine in region 3
  - Proportion of Adenine in region 4
  - Proportion of Thymine in the genome
  - Proportion of Thymine in region 1
  - Proportion of Thymine in region 2
  - Proportion of Thymine in region 3
  - Proportion of Thymine in region 4
  - Proportion of Cytosine in the genome
  - Proportion of Cytosine in region 1
  - Proportion of Cytosine in region 2
  - Proportion of Cytosine in region 3
  - Proportion of Cytosine in region 4
  - Proportion of Guanine and Cytosine in region 1
  - Proportion of Guanine and Cytosine in region 2
  - Proportion of Guanine and Cytosine in region 3
  - Proportion of Guanine and Cytosine in region 4
- ORF attributes
  - Proportion of Arginine
  - Proportion of Alanine
  - Proportion of Asparagine
  - Proportion of Aspartic Acid
  - Proportion of Cysteine
  - Proportion of Glutamic Acid
  - Proportion of Glutamine
  - Proportion of Glycine
  - Proportion of Histidine

- Proportion of Isoleucine
- Length
- Sense
- Proportion of Leucine
- Proportion of Lysine
- Proportion of Methionine
- Proportion of Adenine
- Proportion of Adenine in region 1
- Proportion of Adenine in region 2
- Proportion of Cytosine
- Proportion of Cytosine in region 1
- Proportion of Cytosine in region 2
- Proportion of Guanine
- Proportion of Guanine in region 1
- Proportion of Guanine in region 2
- Proportion of nucleotides regarding the genome ( $ORF\_size / genome\_size$ )
- Proportion of Thymine
- Proportion of Thymine in region 1
- Proportion of Thymine in region 2
- Proportion of Phenylalanine
- Proportion of Proline
- Proportion of Serine
- Proportion of Threonine
- Proportion of Tryptophan
- Proportion of Tyrosine
- Proportion of Valine

# Charts of Family attributes

## Proportion of Guanine in the genome

Histogram

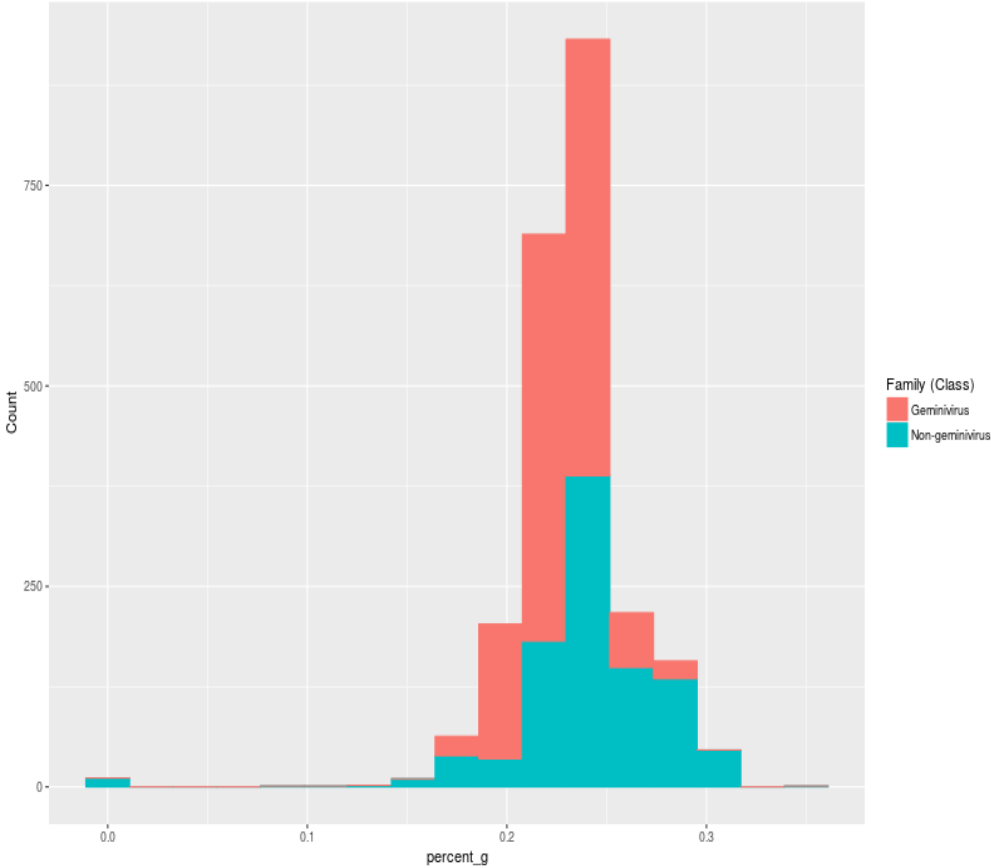

Density

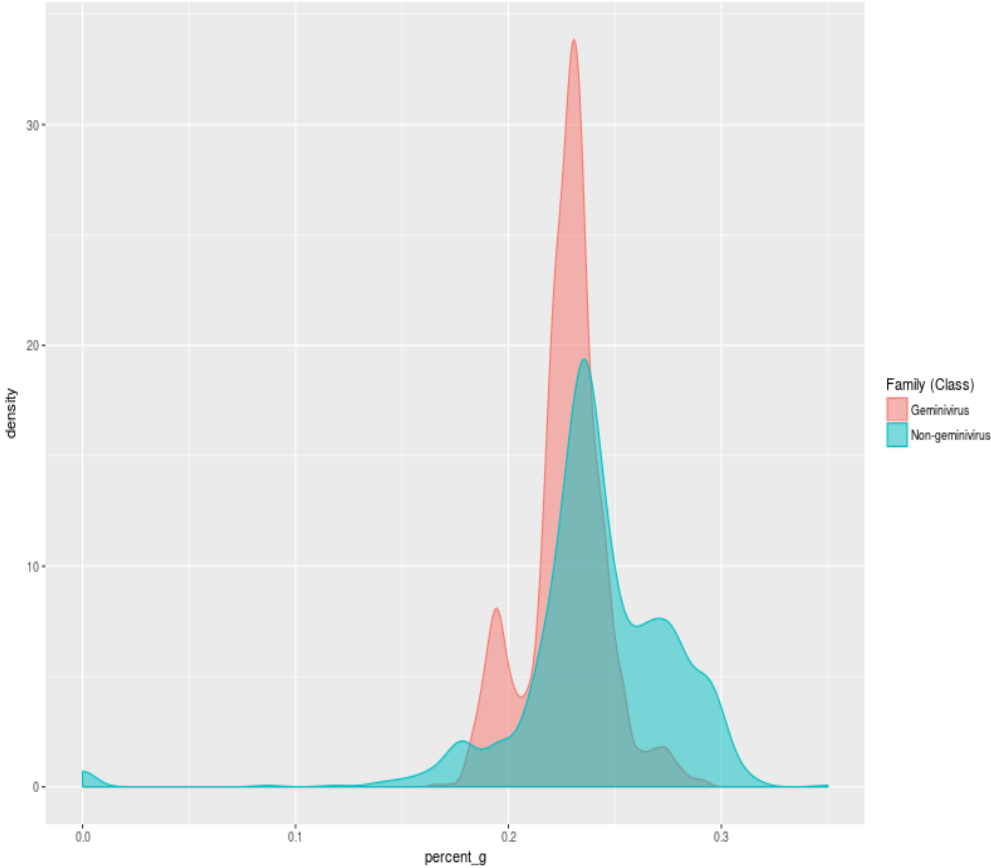

Boxplots

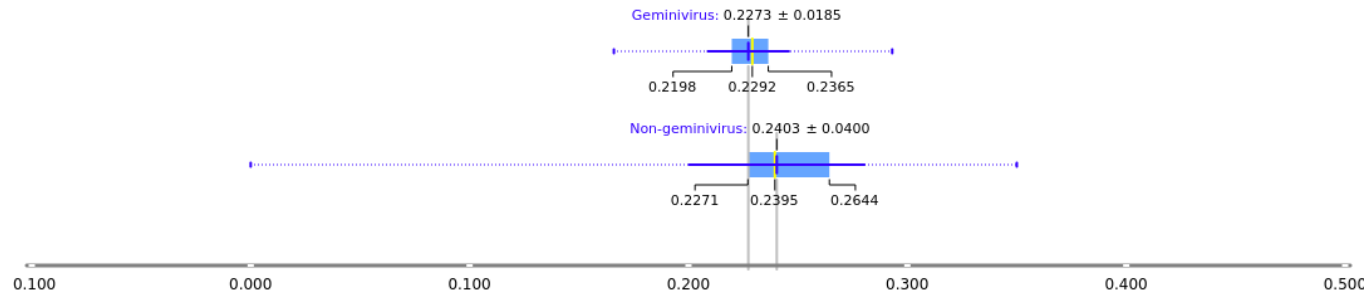



# Proportion of Guanine in region 1

Histogram

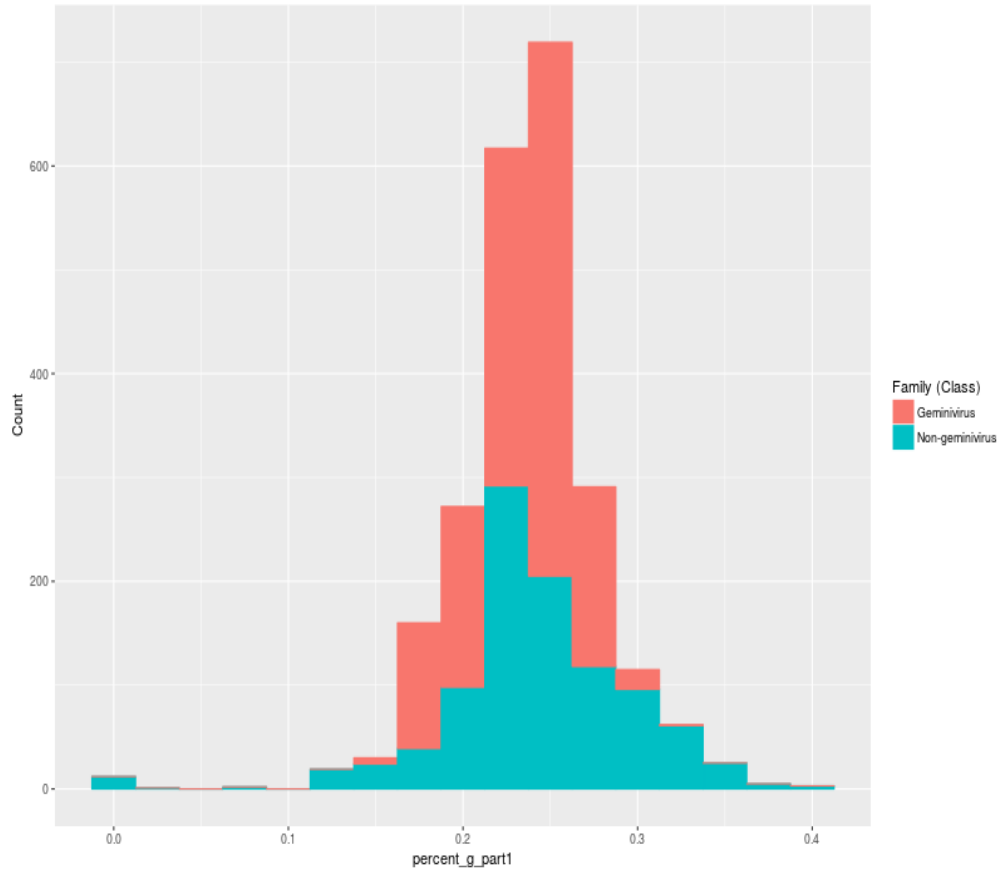

Density

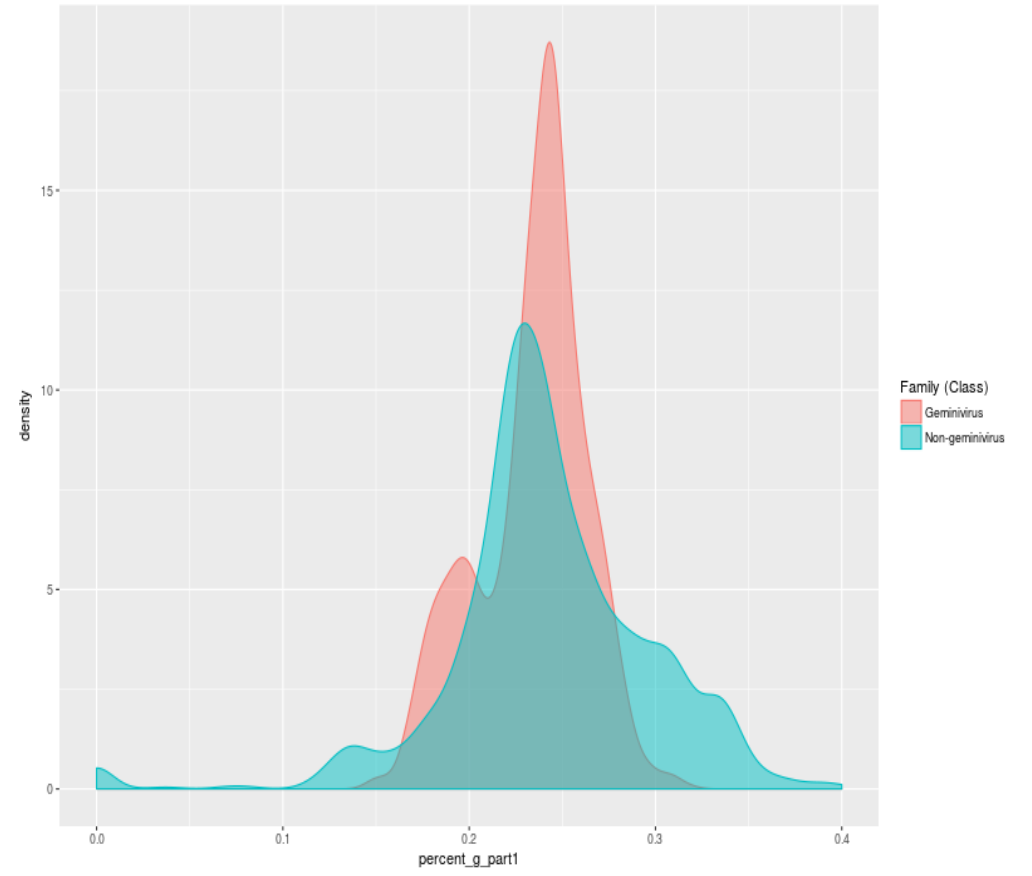

Boxplots

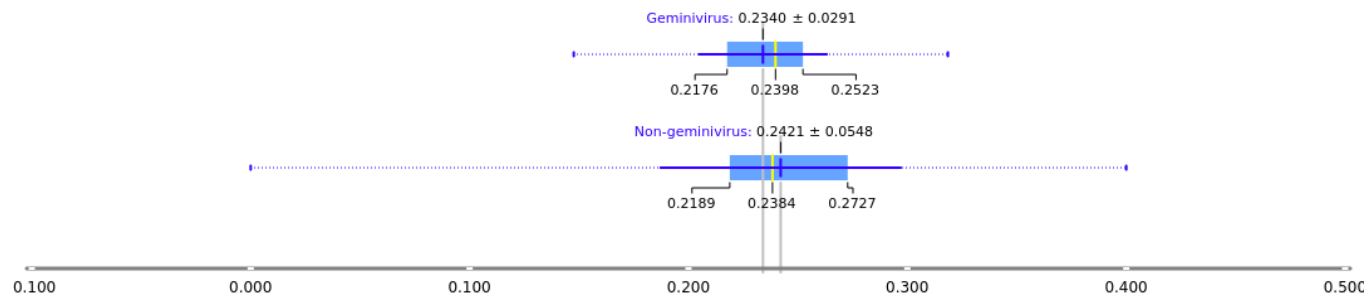

## Proportion of Guanine in region 2

Histogram

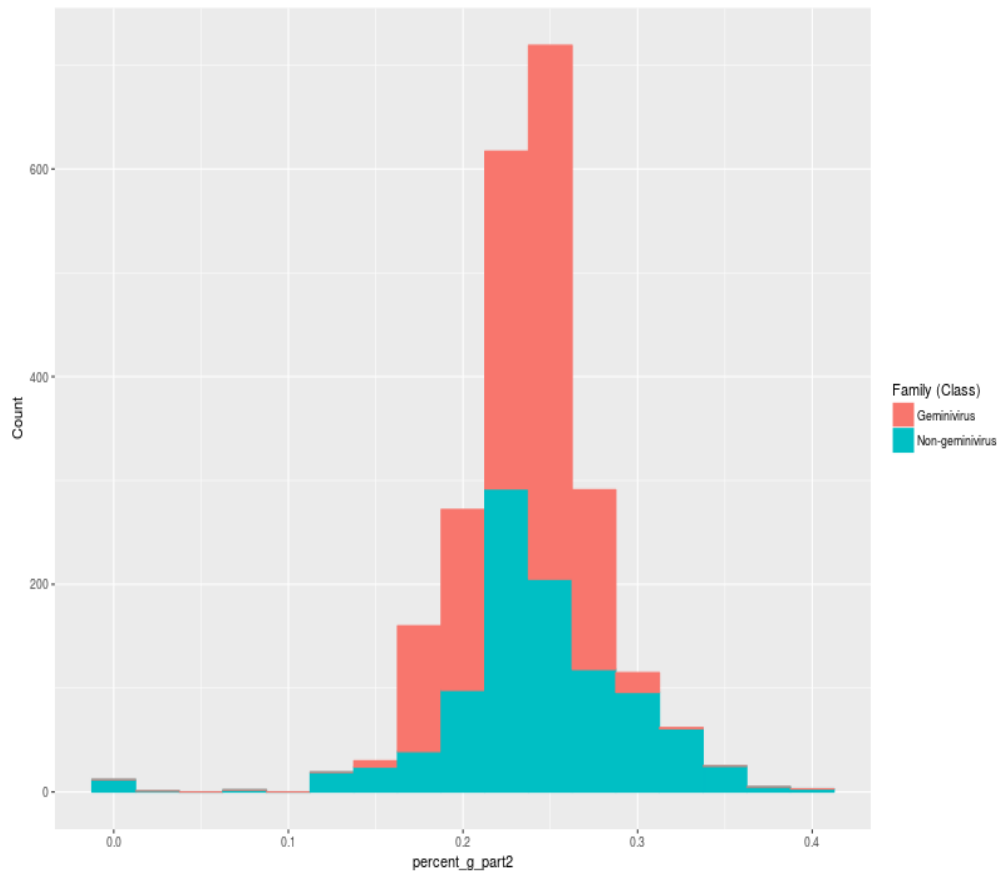

Density

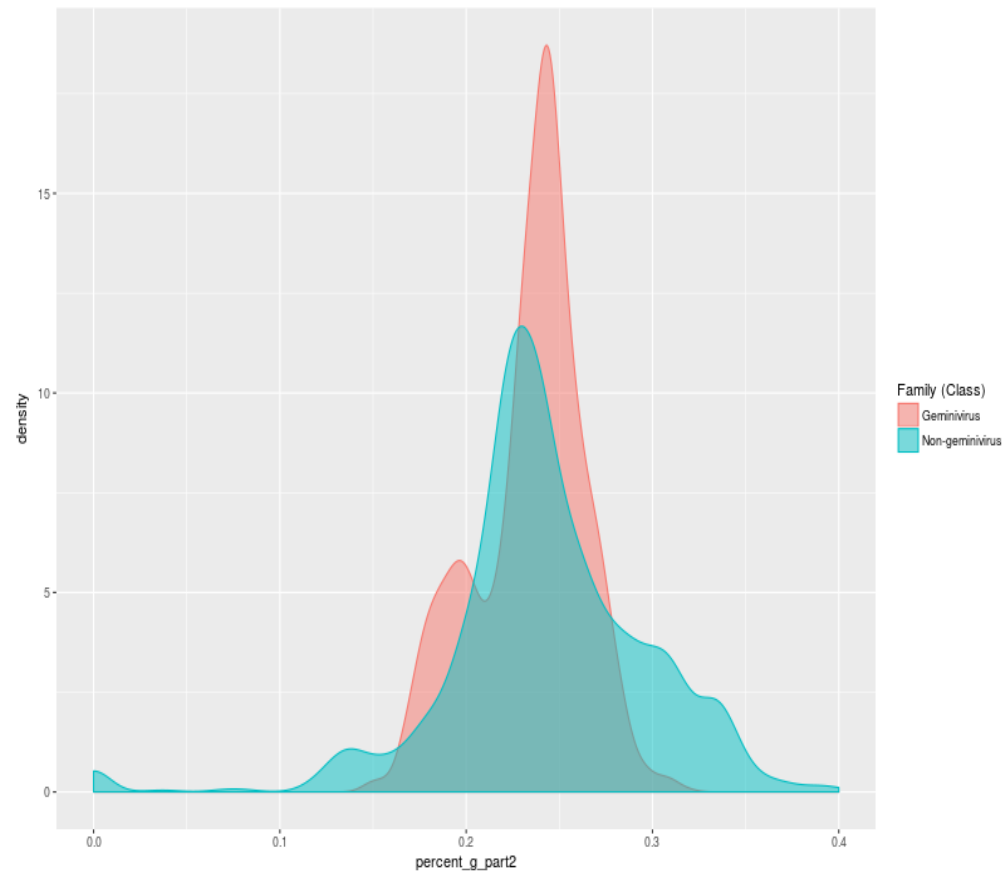

Boxplots



## Proportion of Guanine in region 3

Histogram

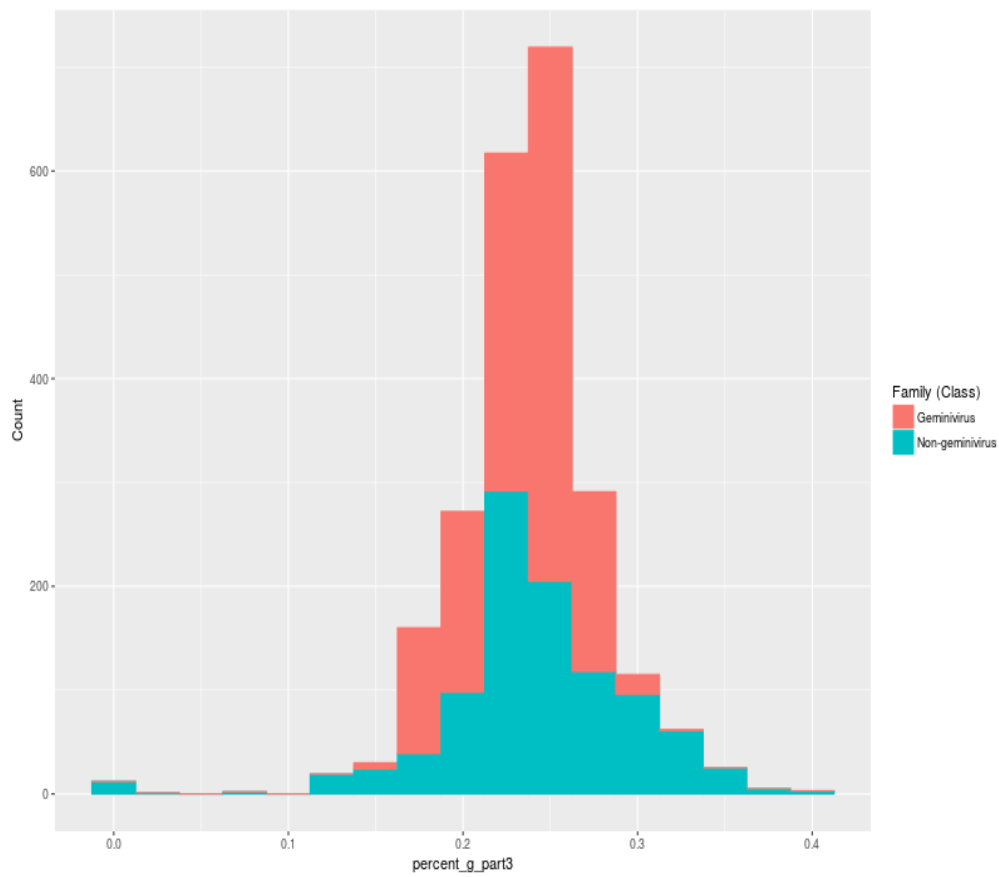

Density

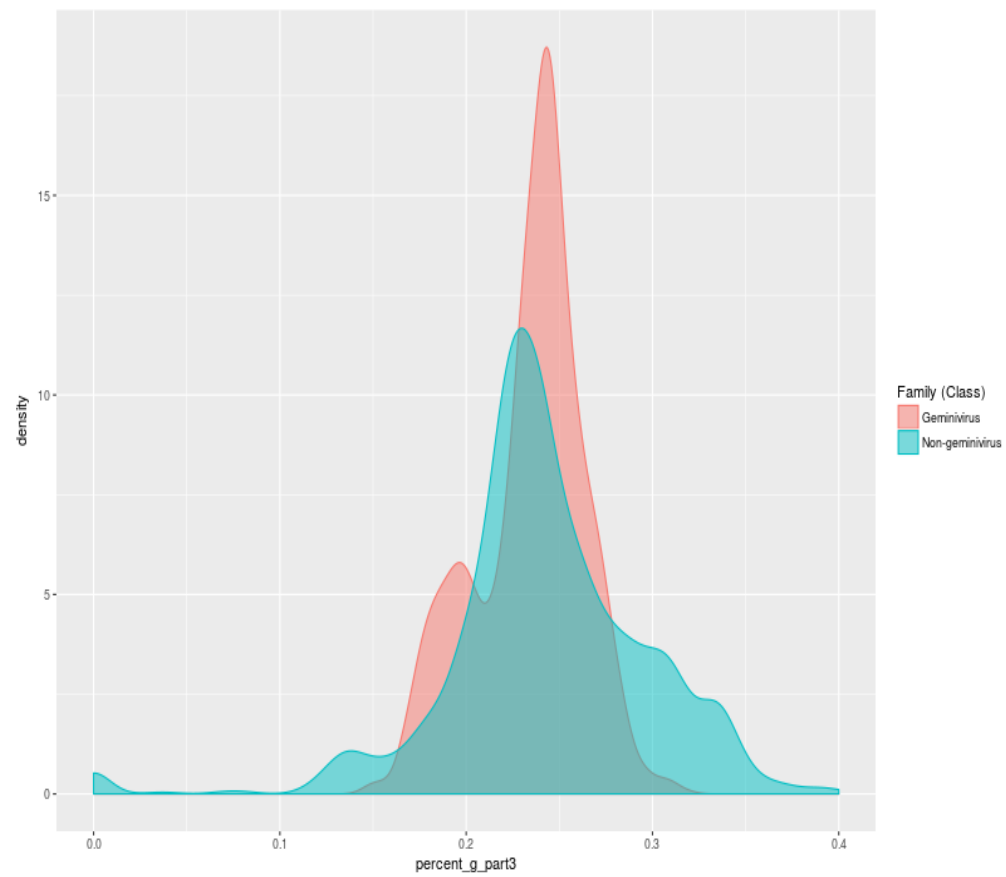

Boxplots



## Proportion of Guanine in region 4

Histogram

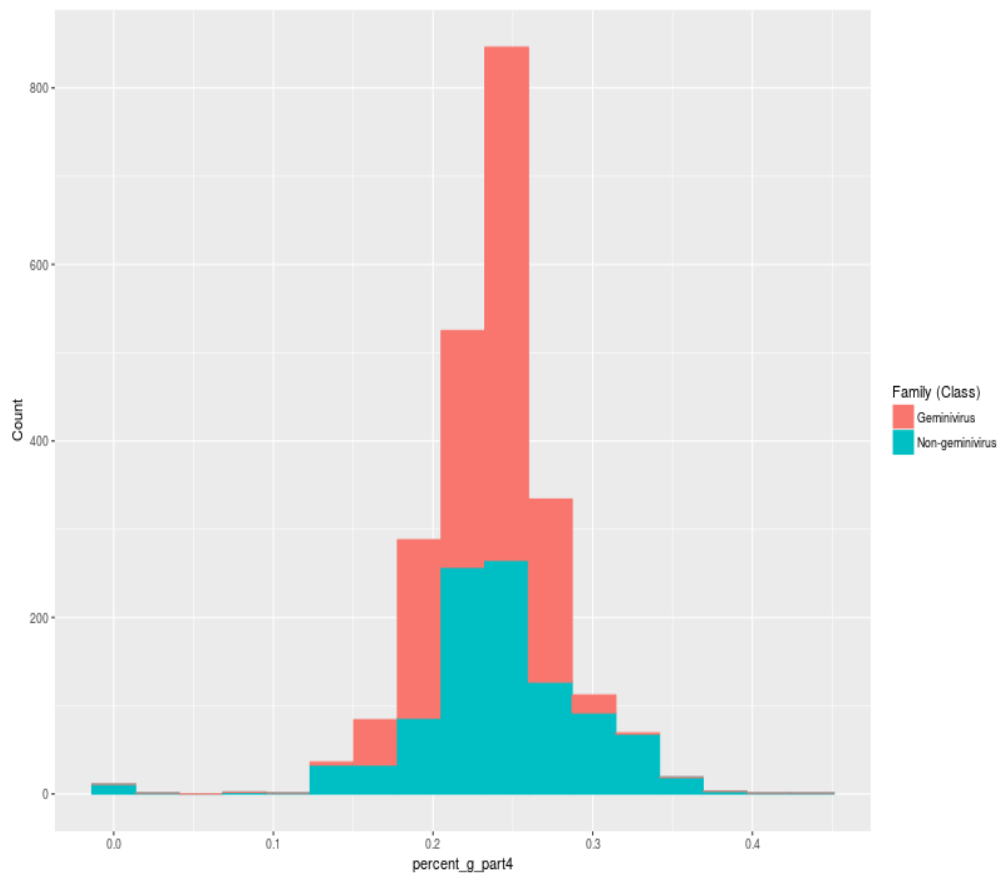

Density

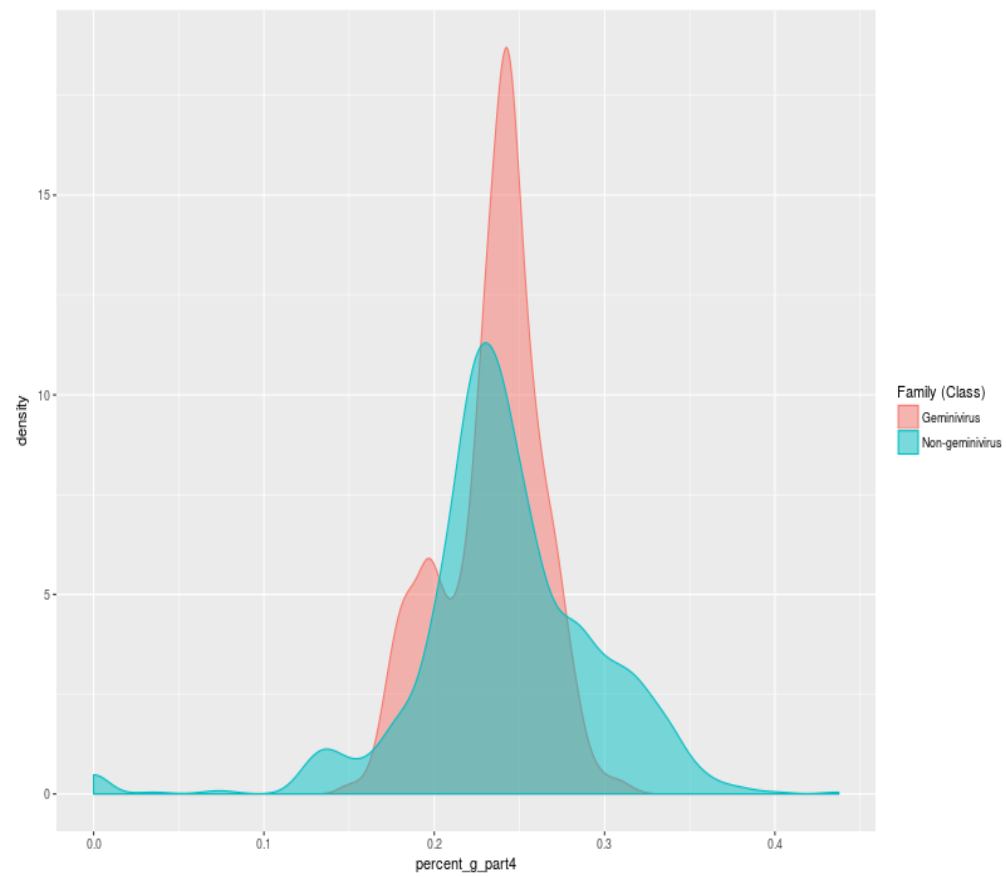

Boxplots

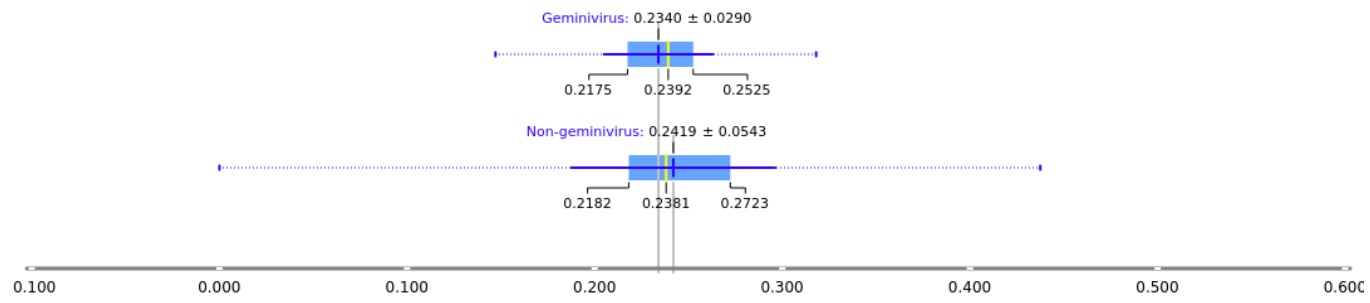



# Proportion of Adenine in the genome

Histogram

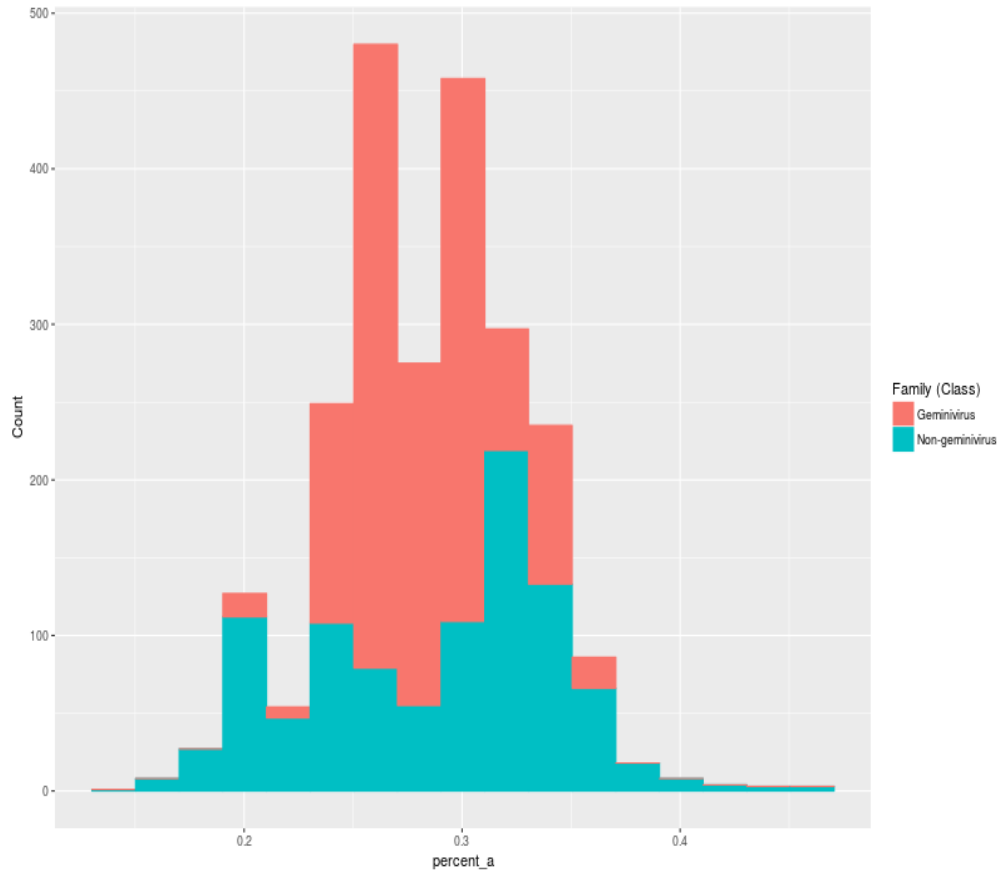

Density

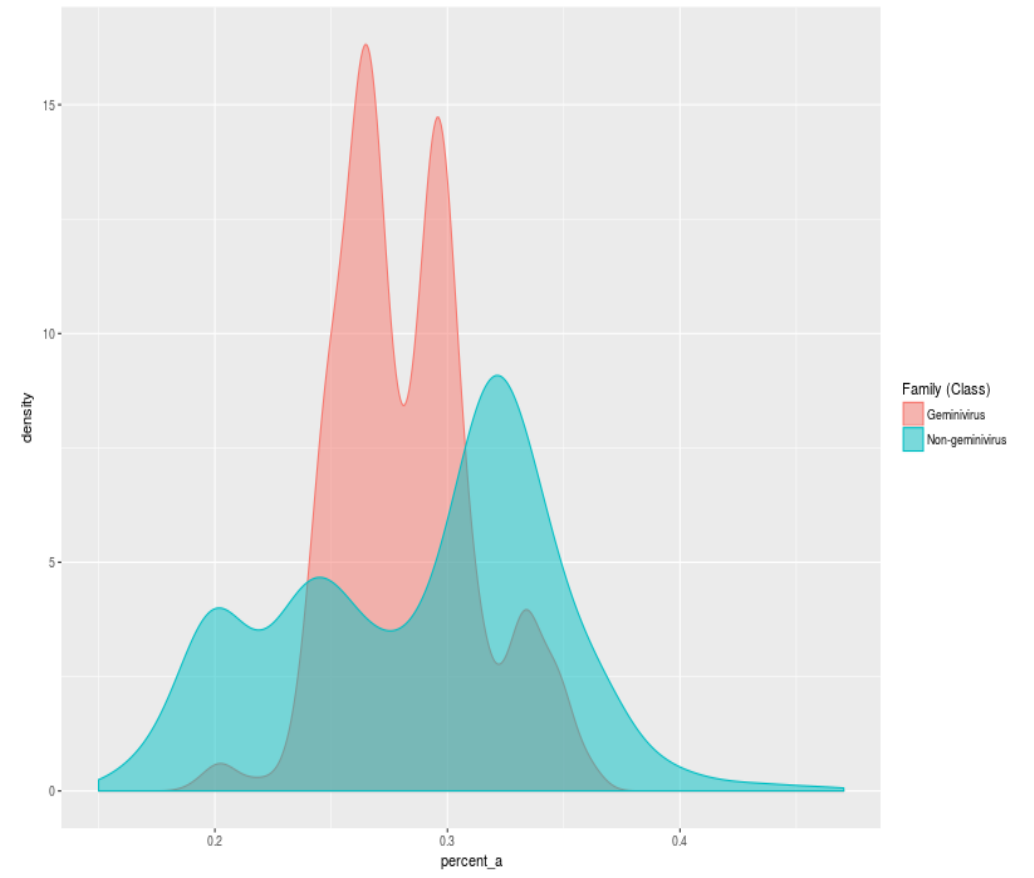

# Boxplots

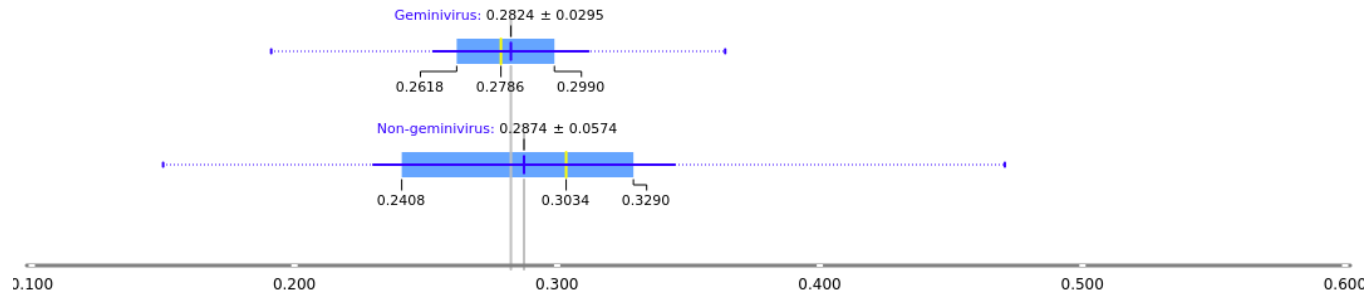

# Proportion of Adenine in region 1

Histogram

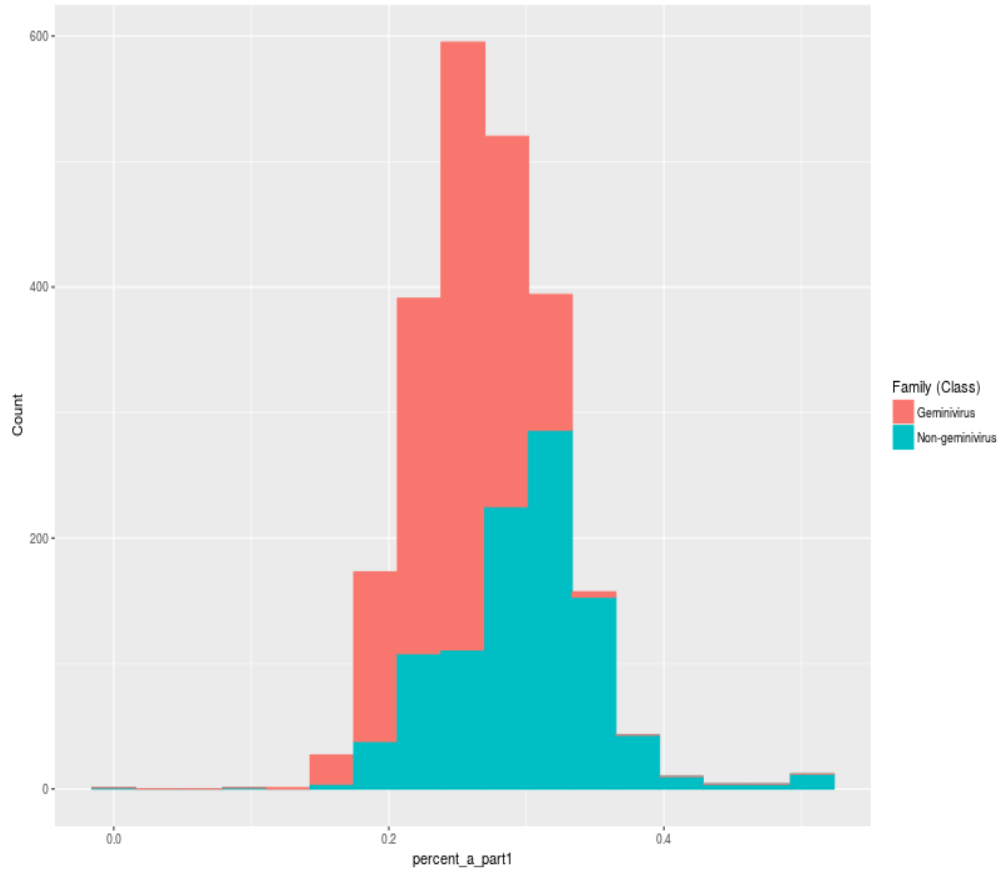

Density

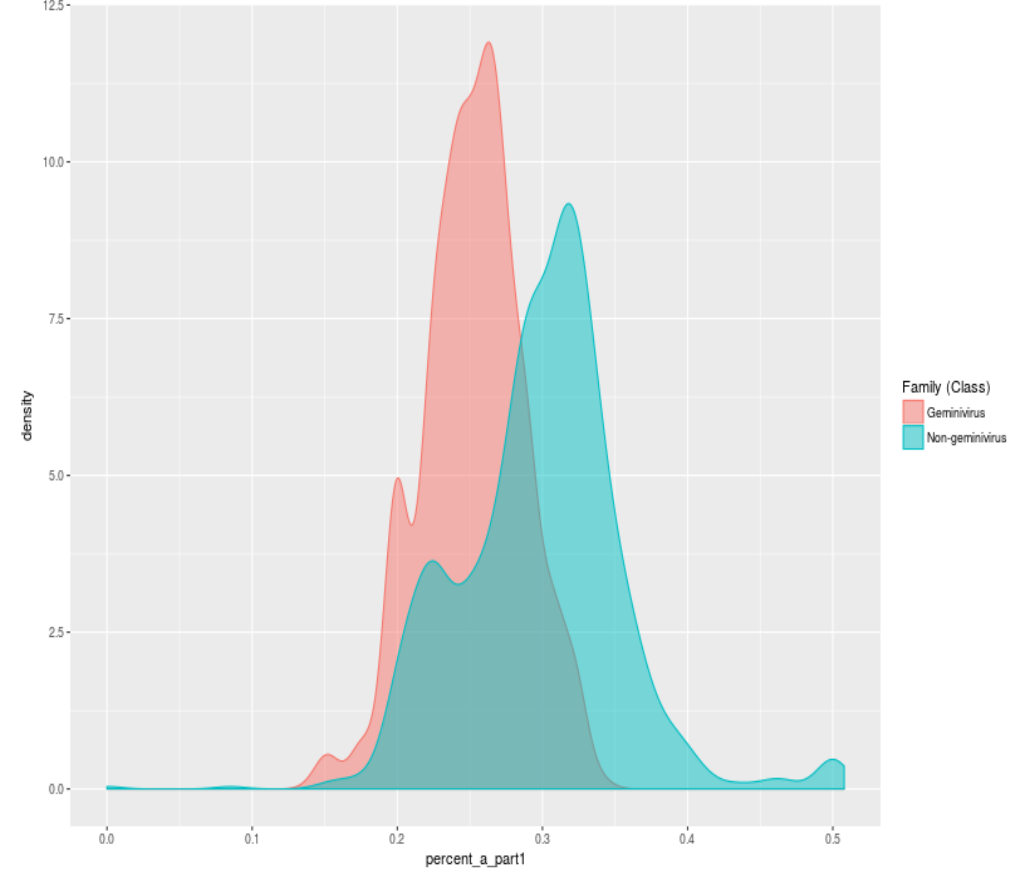

Boxplots

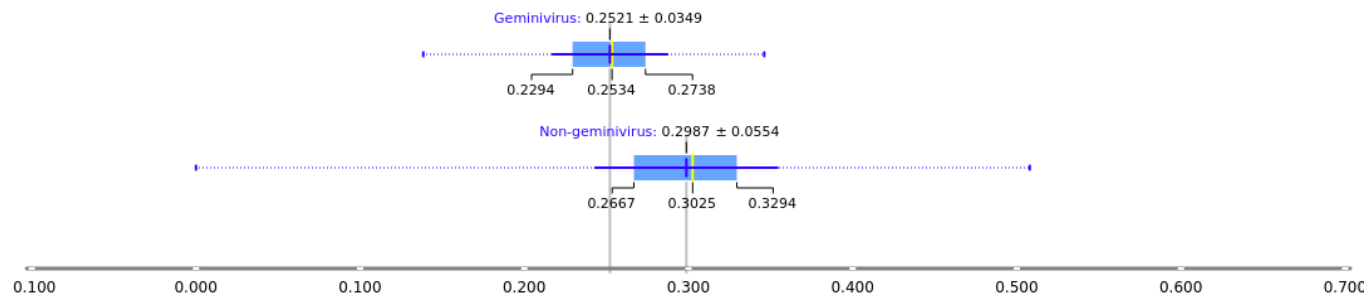

## Proportion of Adenine in region 2

Histogram

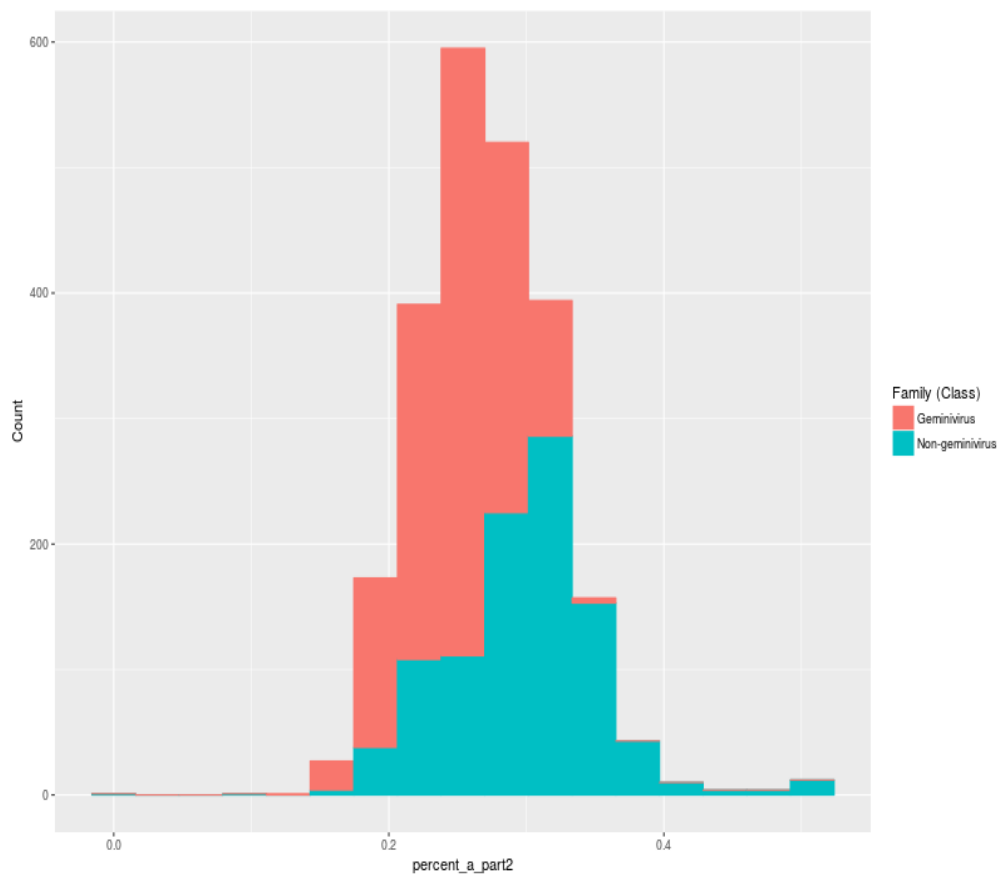

Density

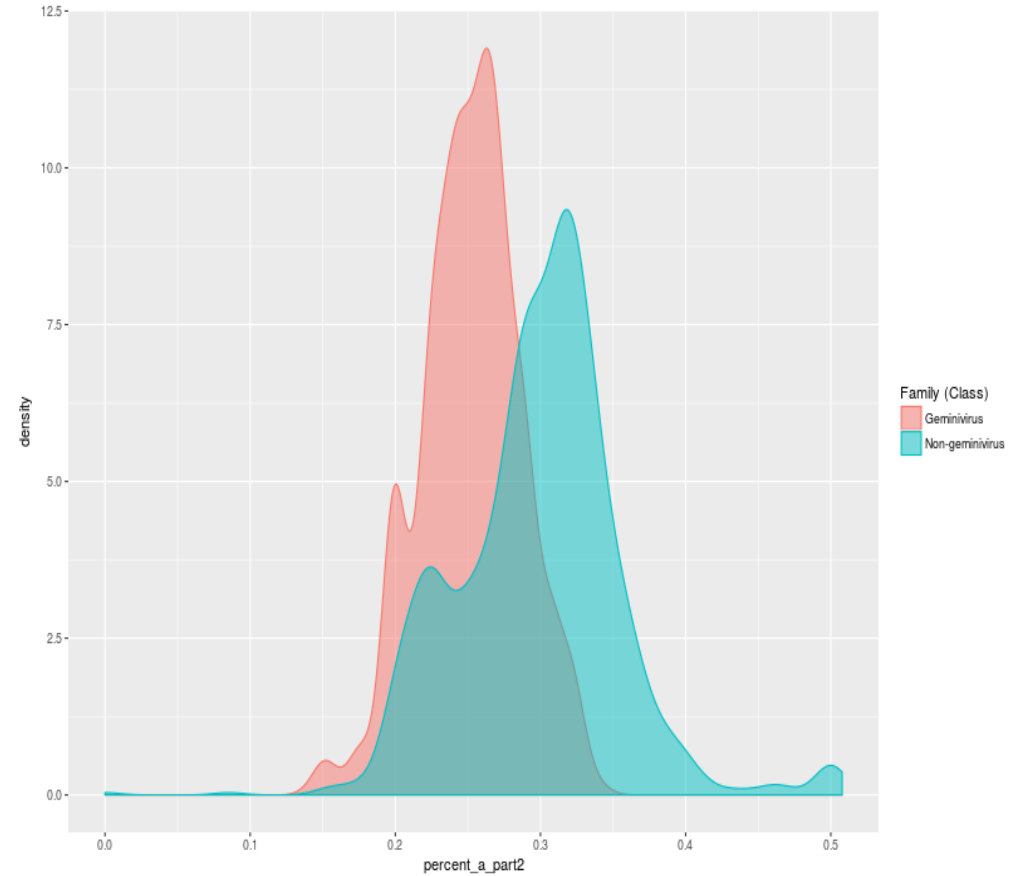

Boxplots

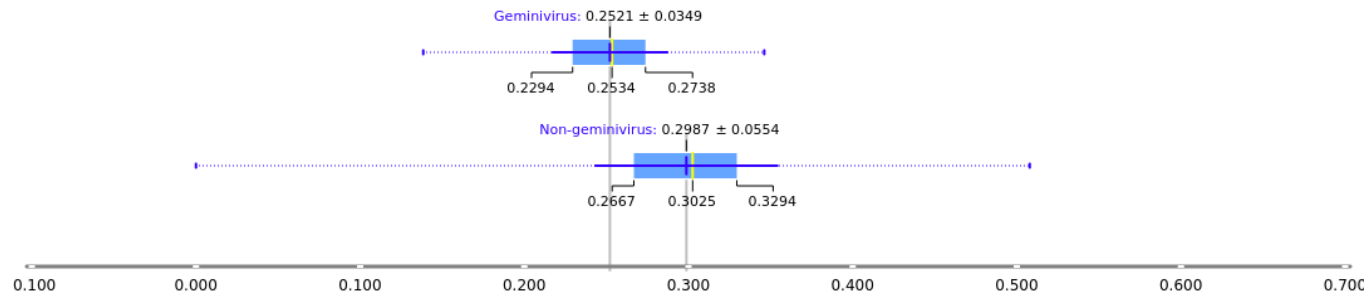

### Proportion of Adenine in region 3

Histogram

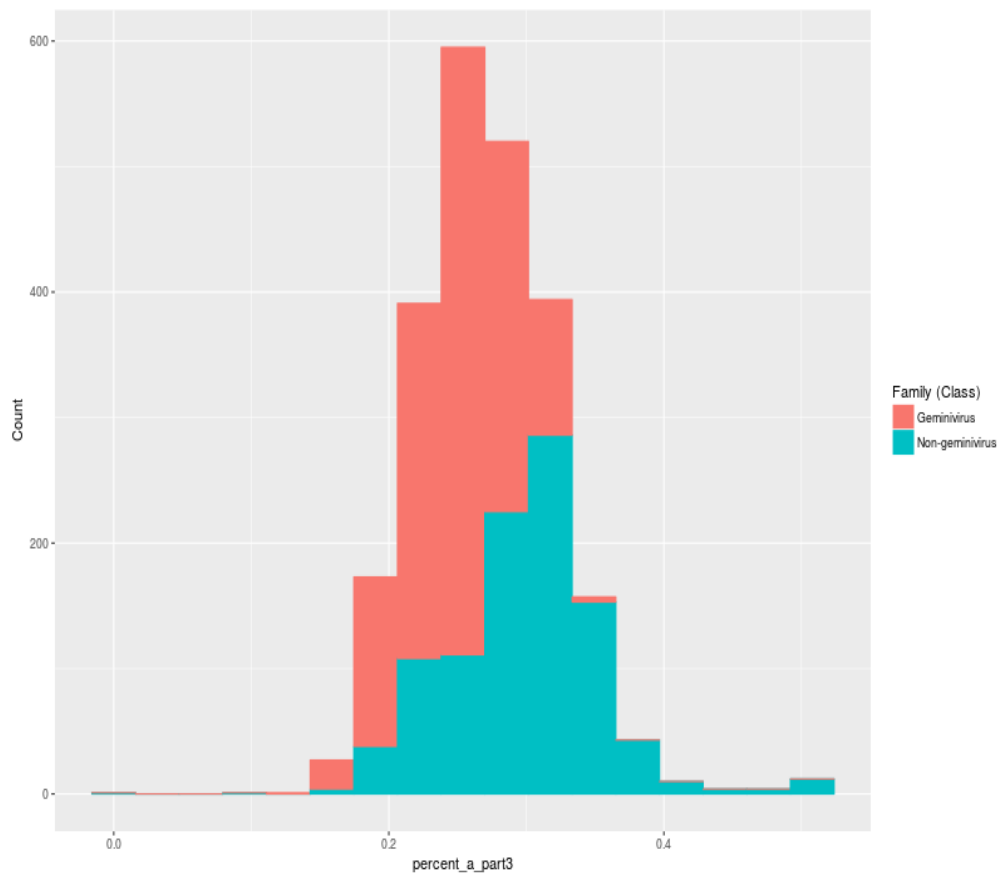

Density

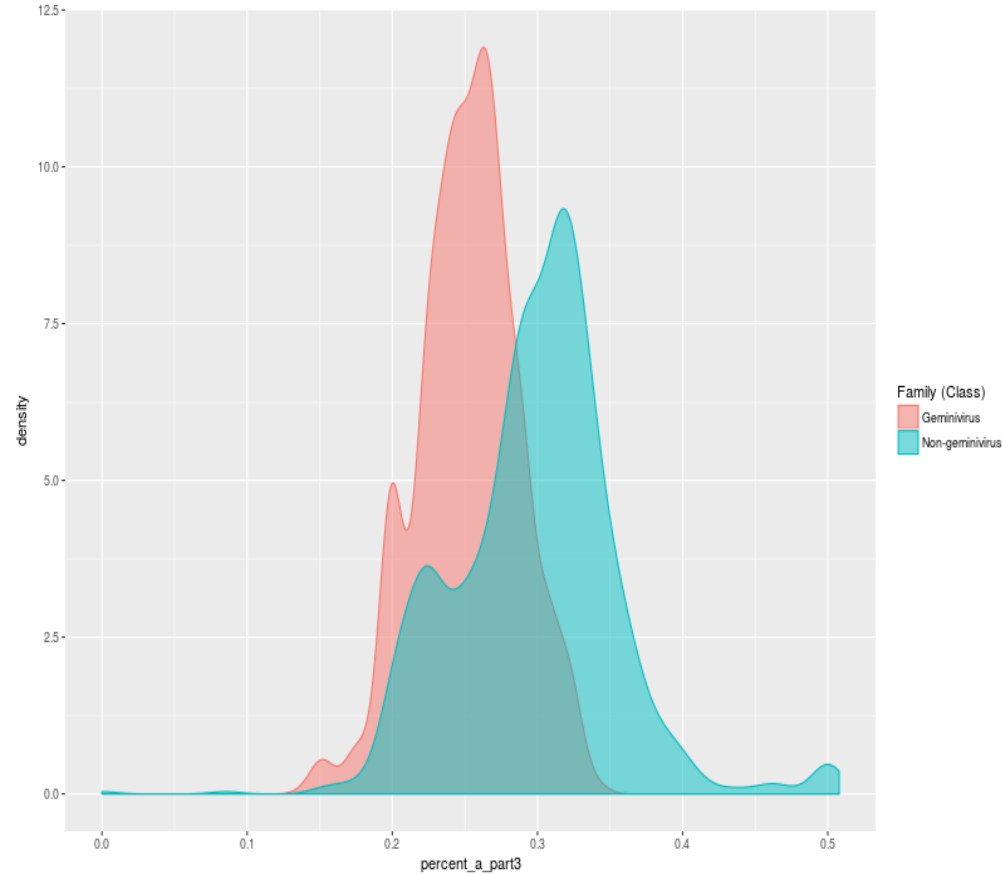

Boxplots





## Proportion of Adenine in region 4

Histogram

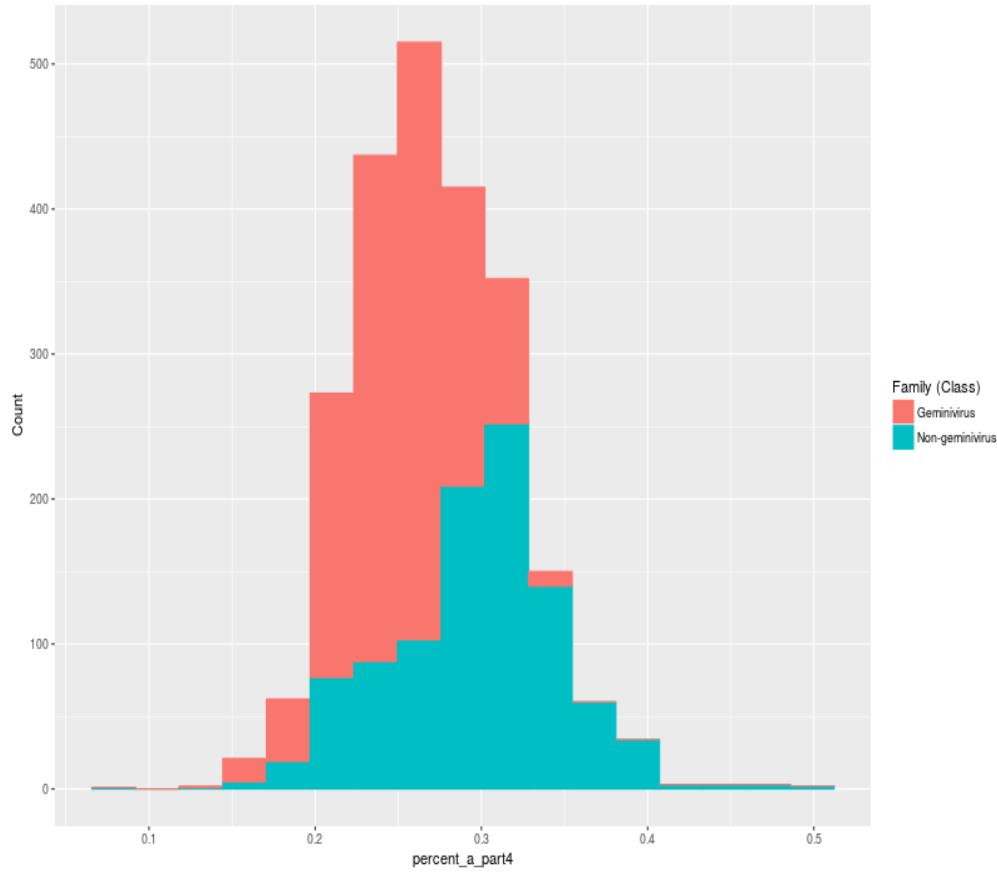

Density

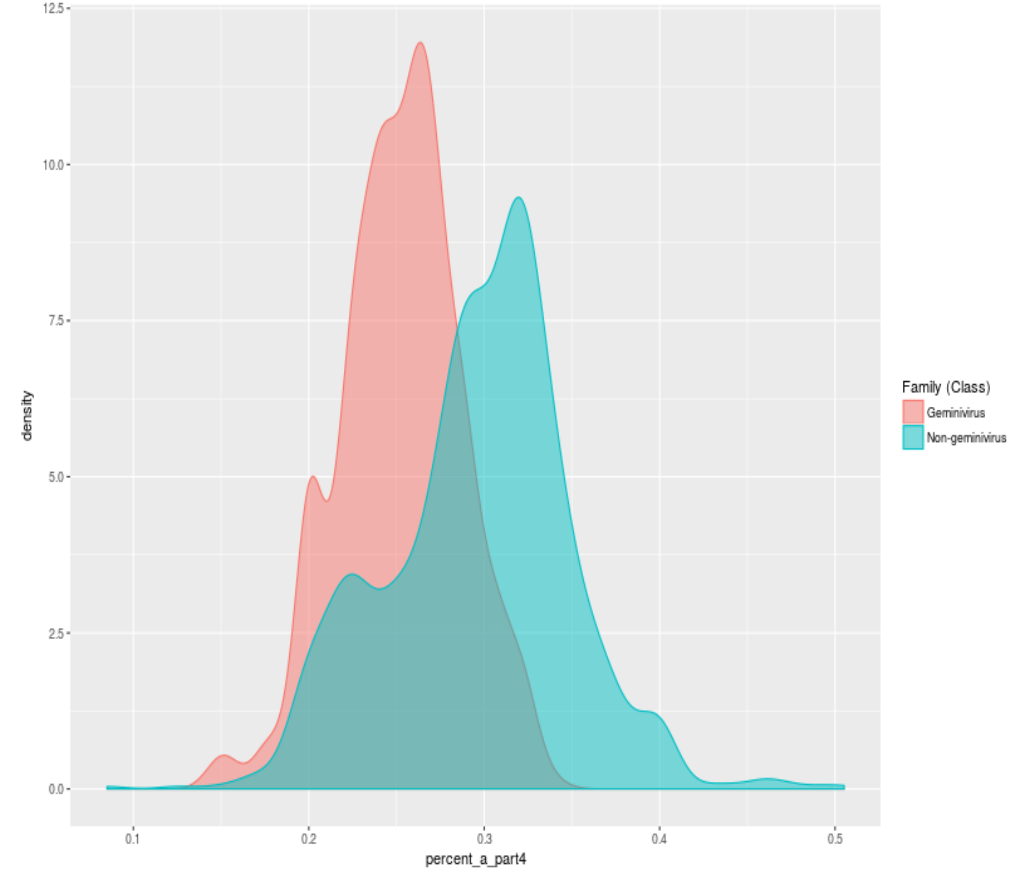

Boxplots

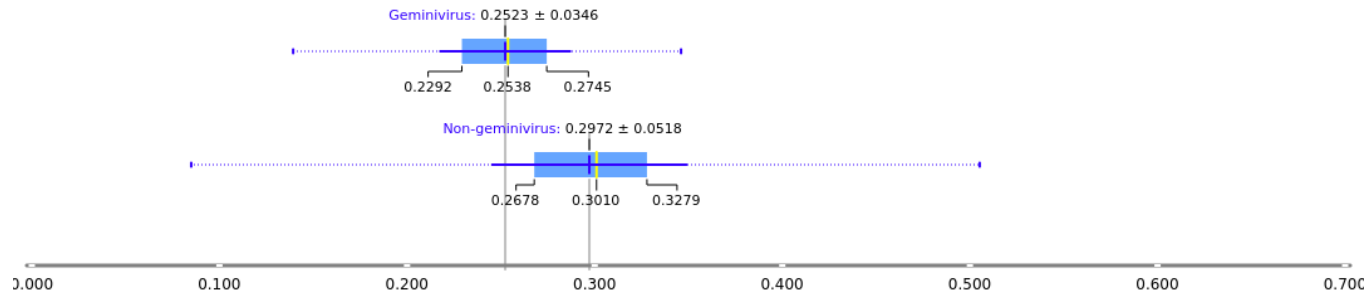

# Proportion of Thymine in the genome

Histogram

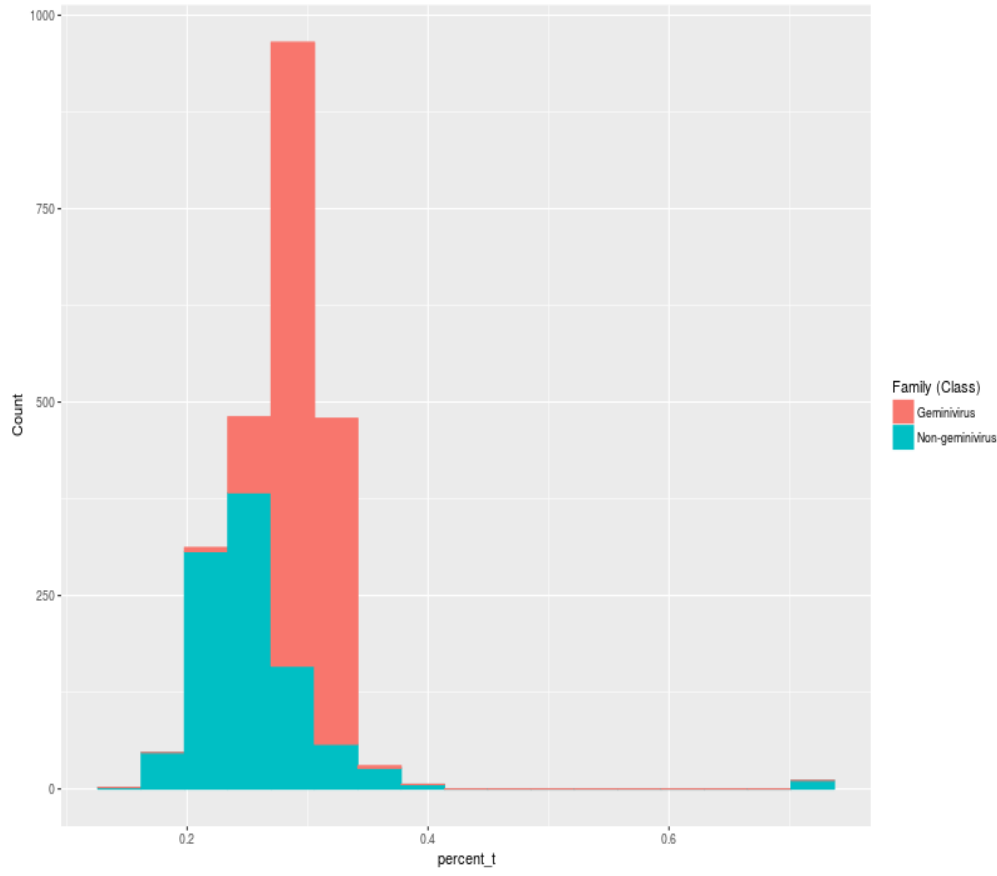

Density

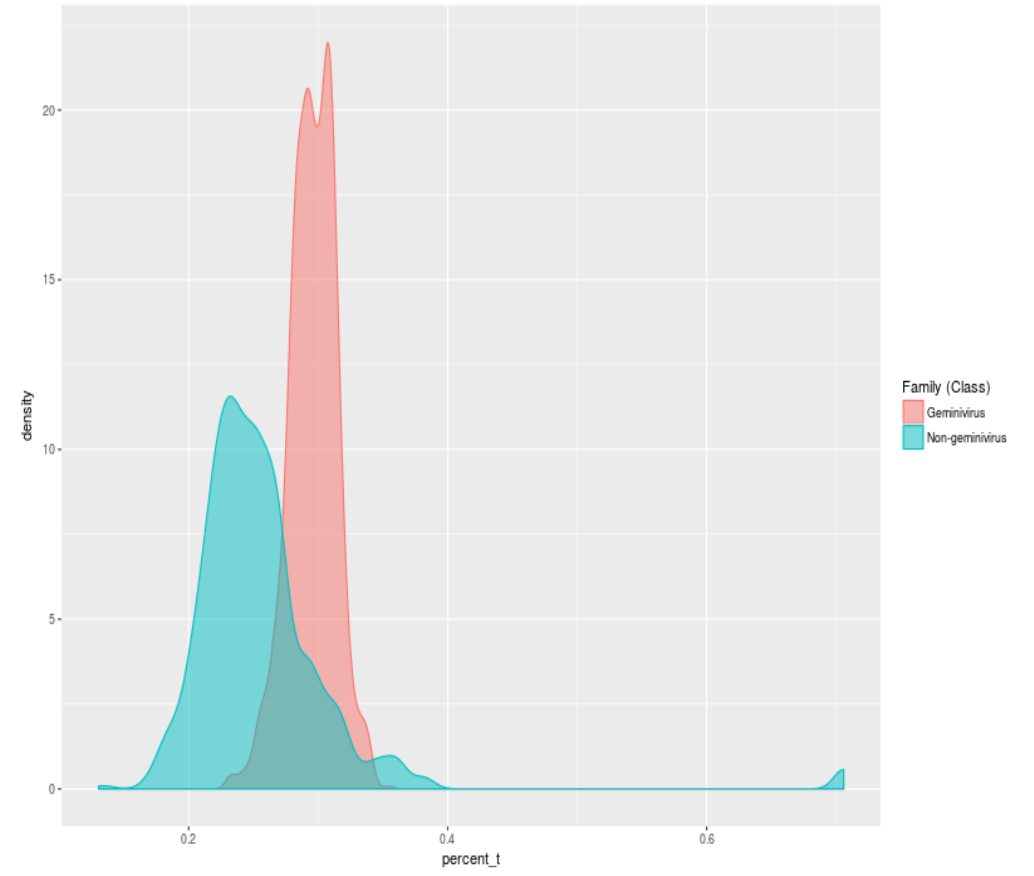

# Boxplots

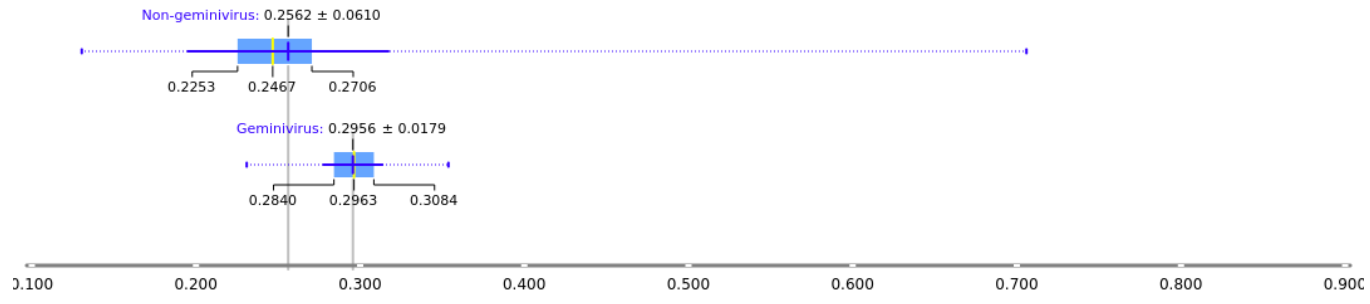

# Proportion of Thymine in region 1

Histogram

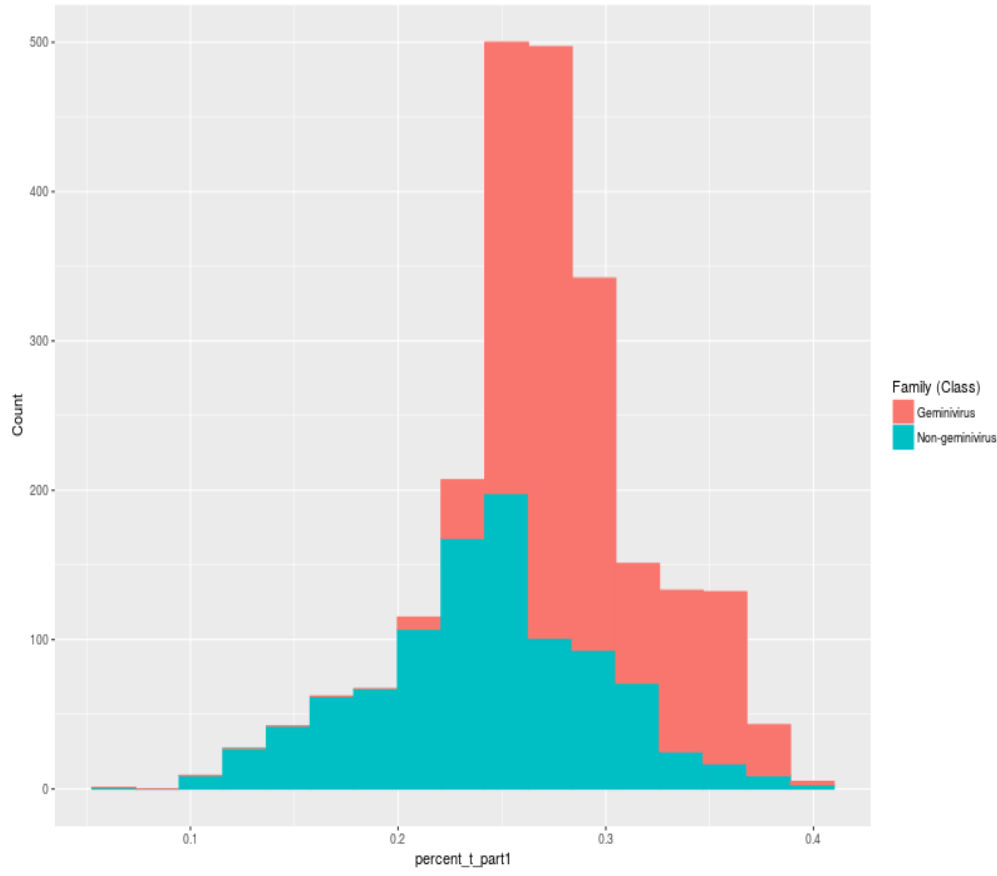

Density

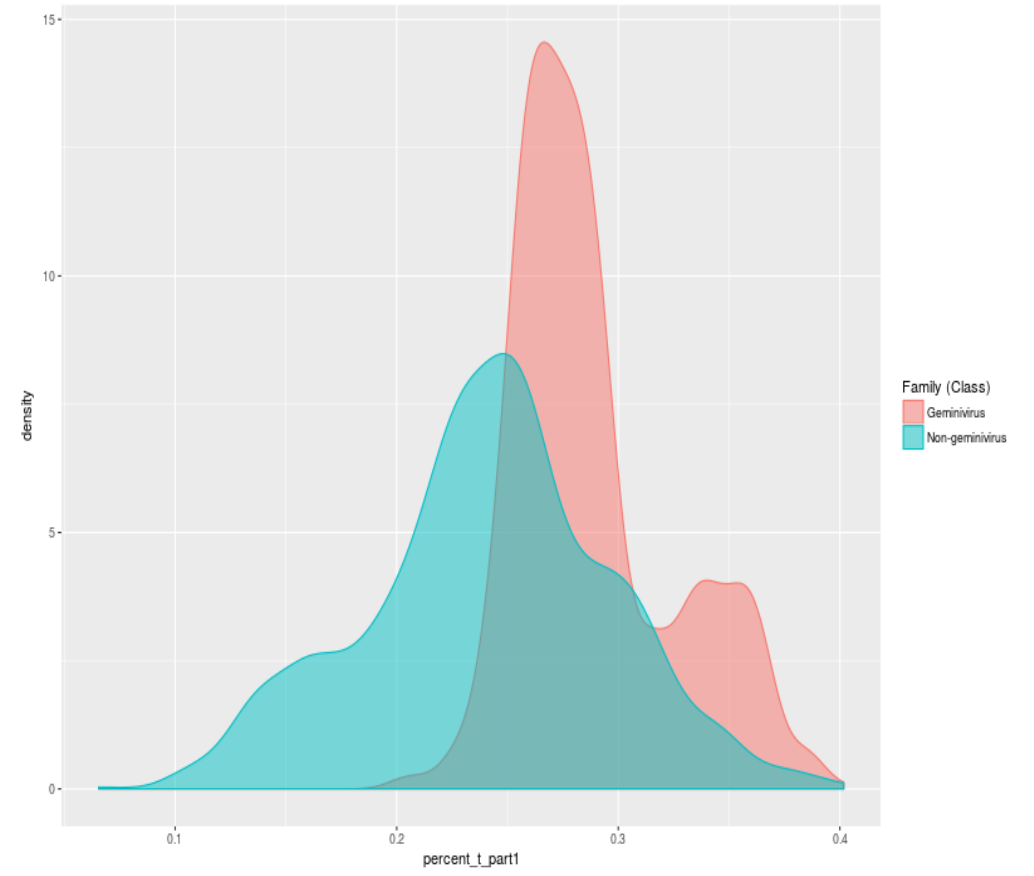

# Boxplots

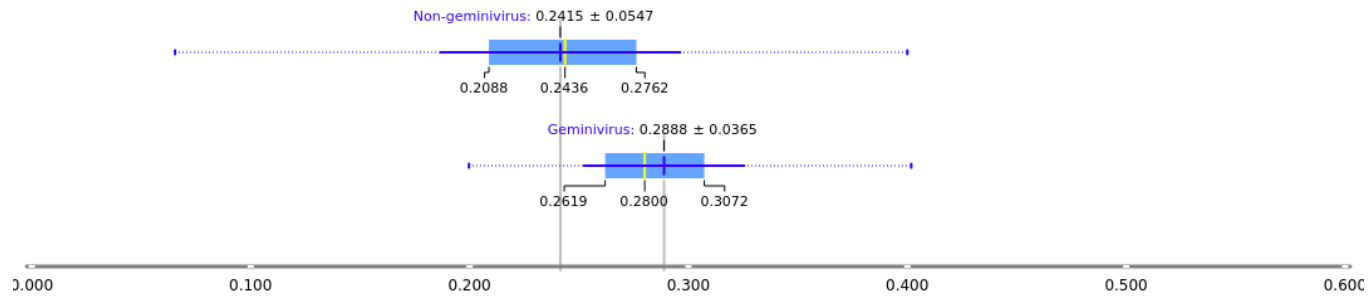

## Proportion of Thymine in region 2

Histogram

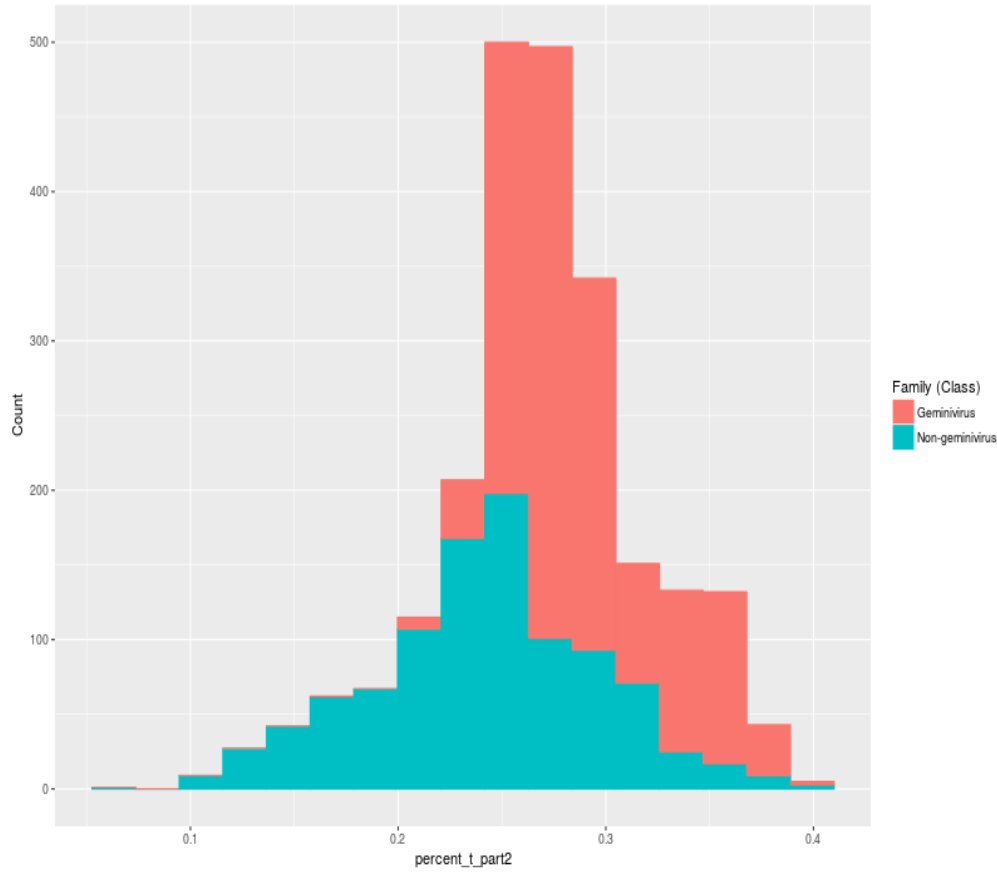

Density

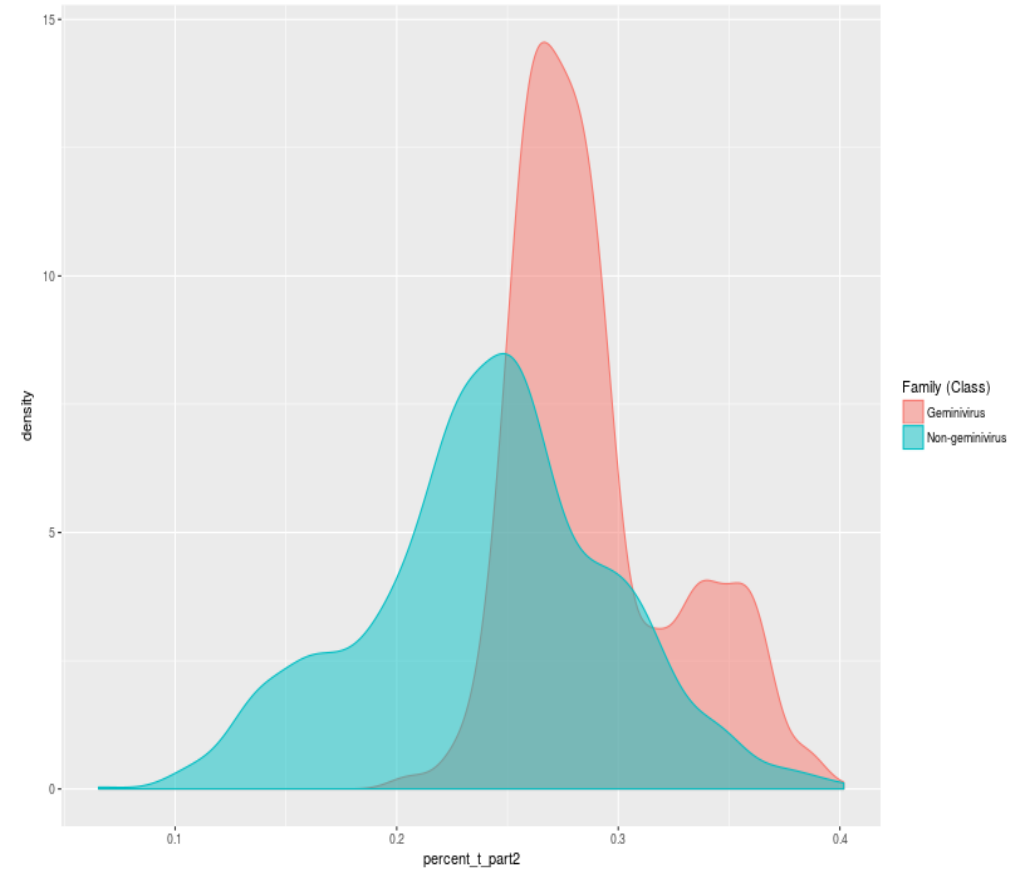

# Boxplots





## Proportion of Thymine in region 3

Histogram

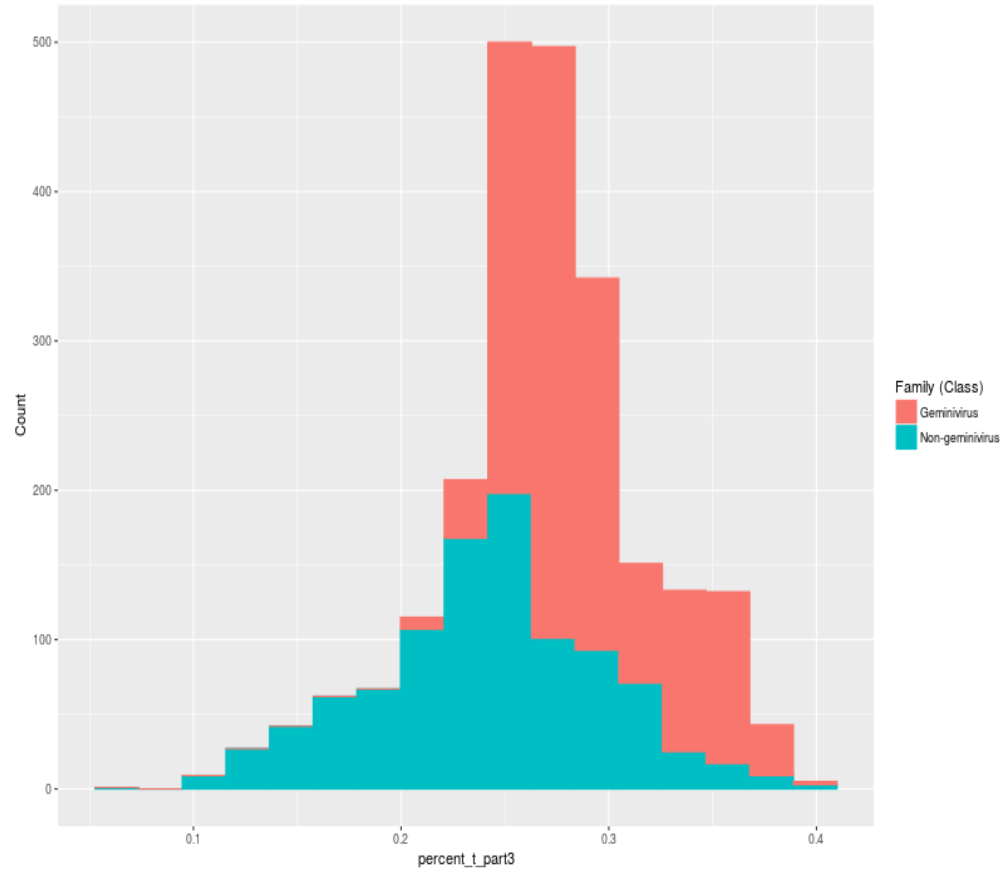

Density

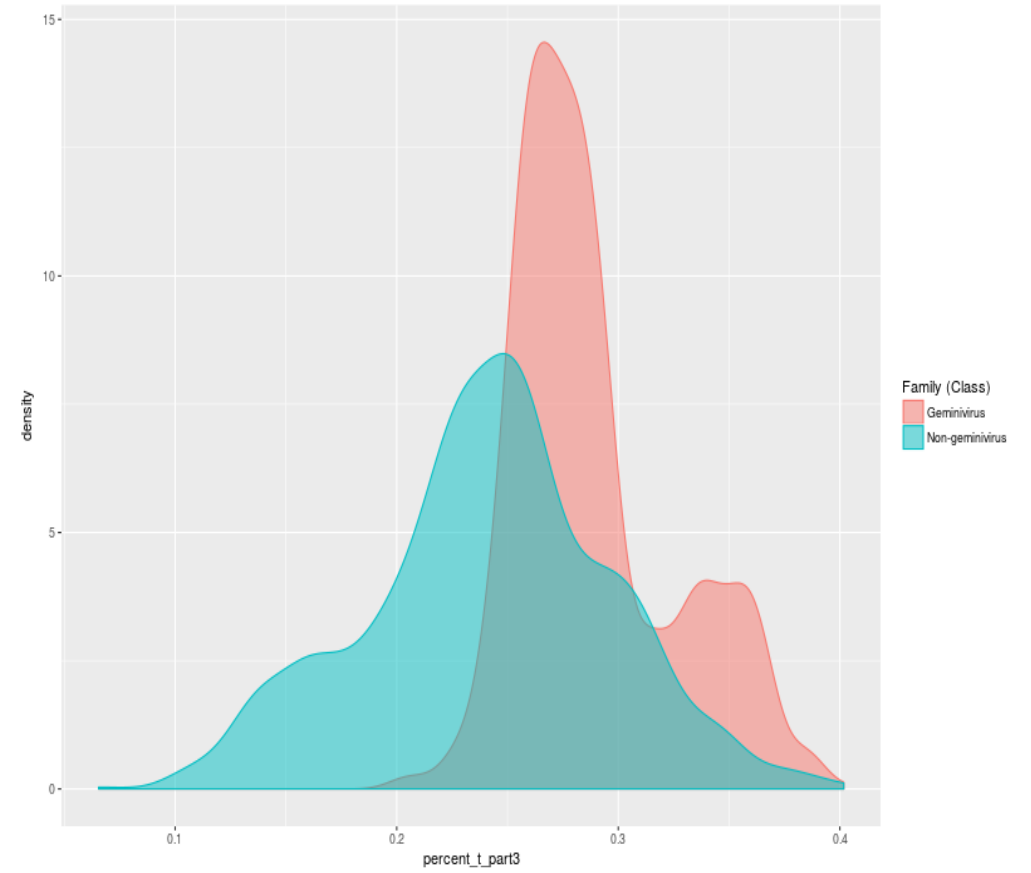

# Boxplots



## Proportion of Thymine in region 4

Histogram

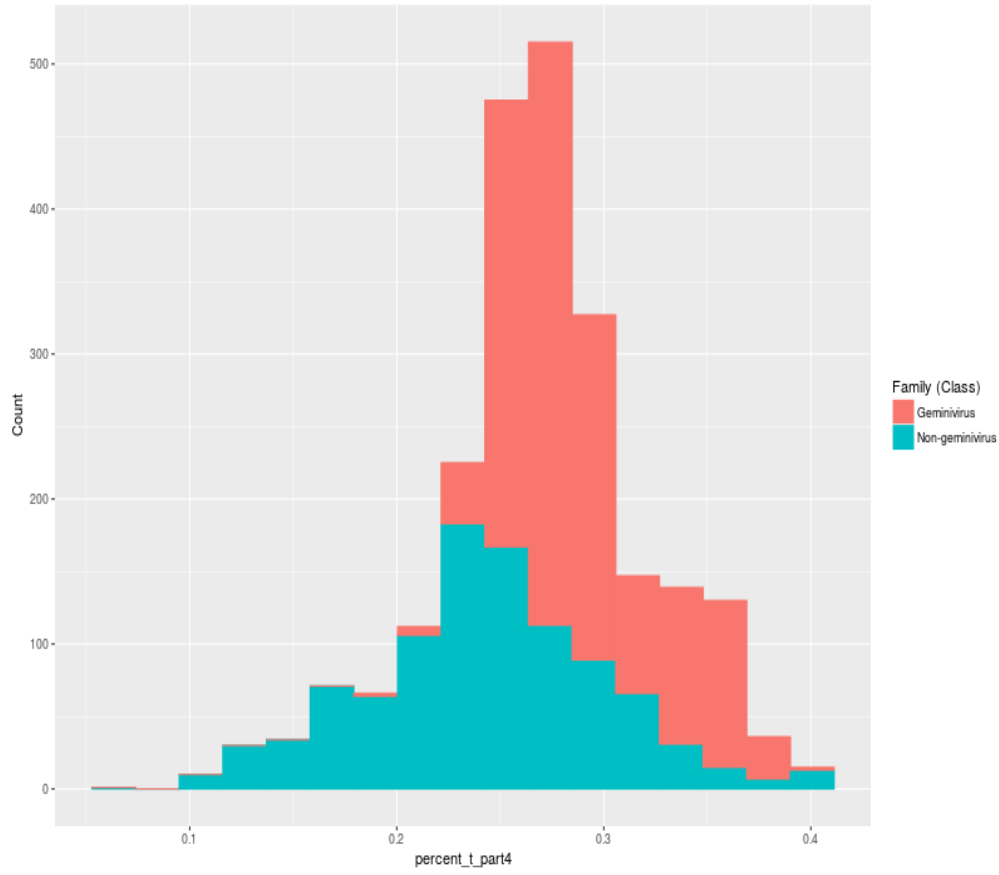

Density

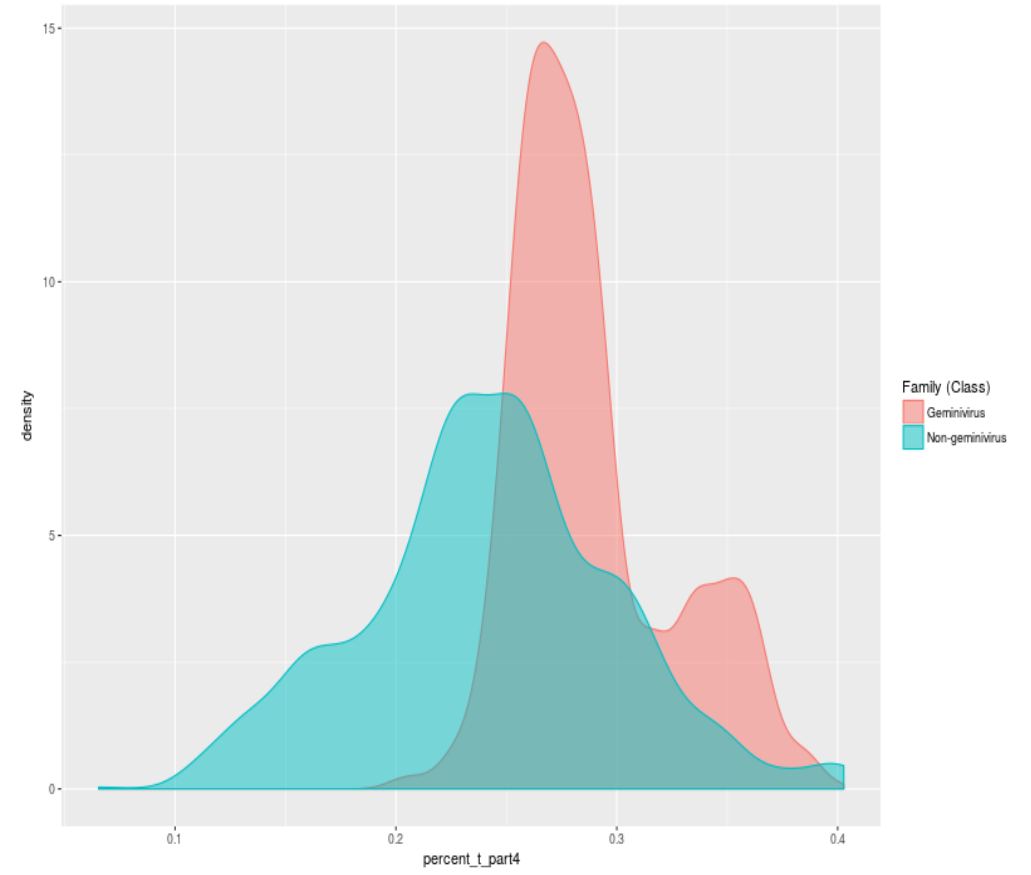

Boxplots

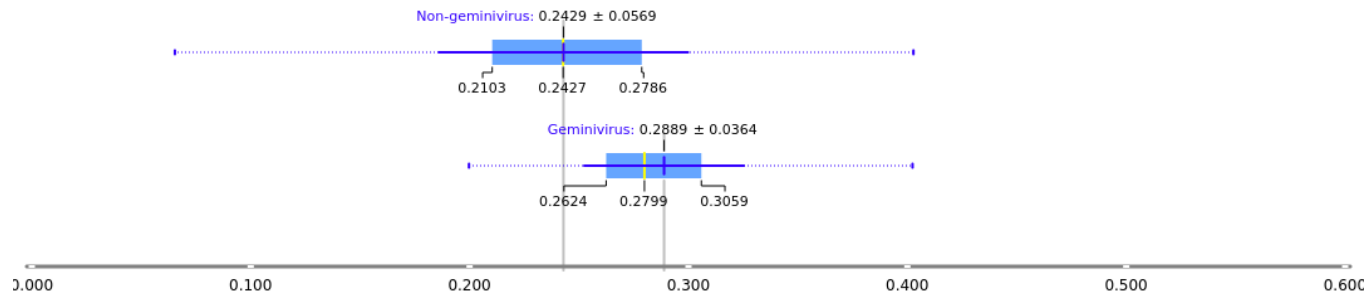

# Proportion of Cytosine in the genome

Histogram

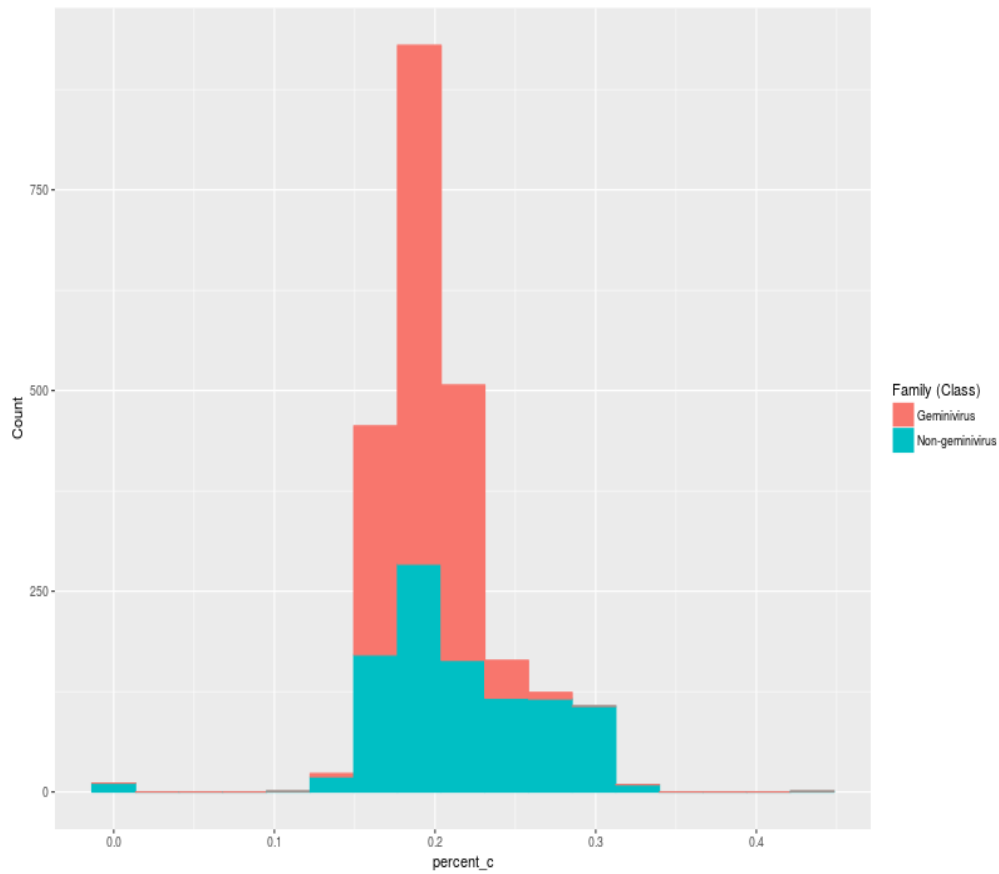

Density

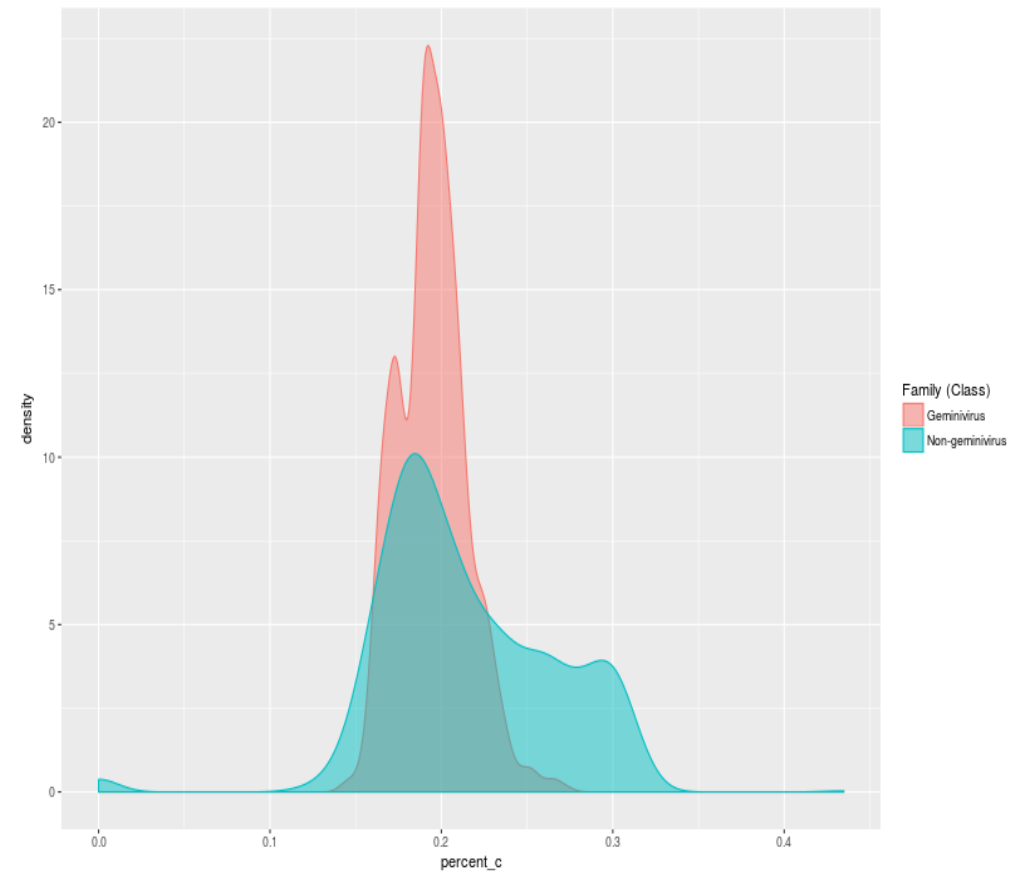

Boxplots

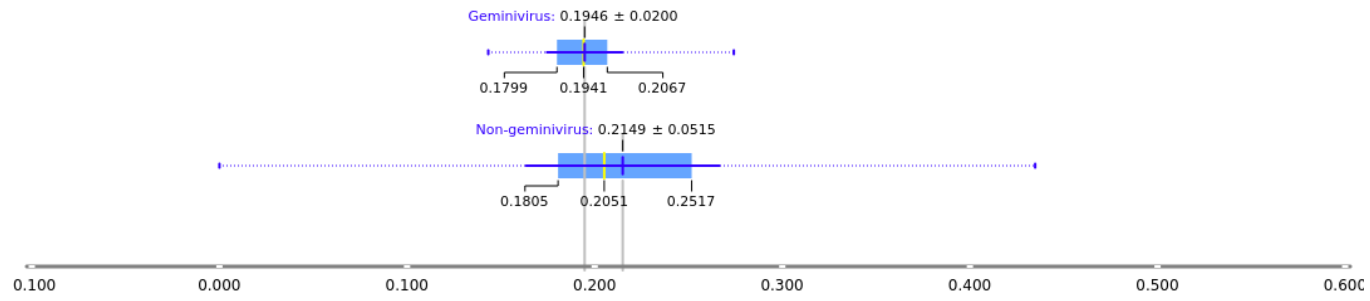

# Proportion of Cytosine in region 1

Histogram

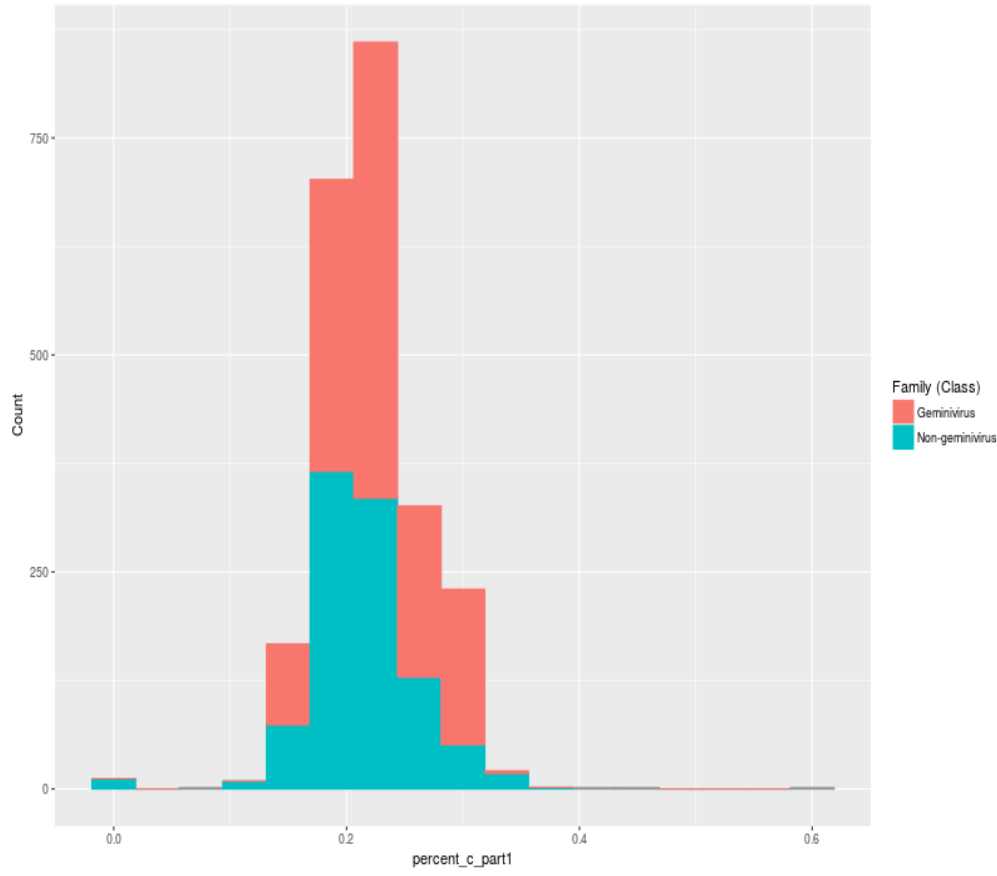

Density

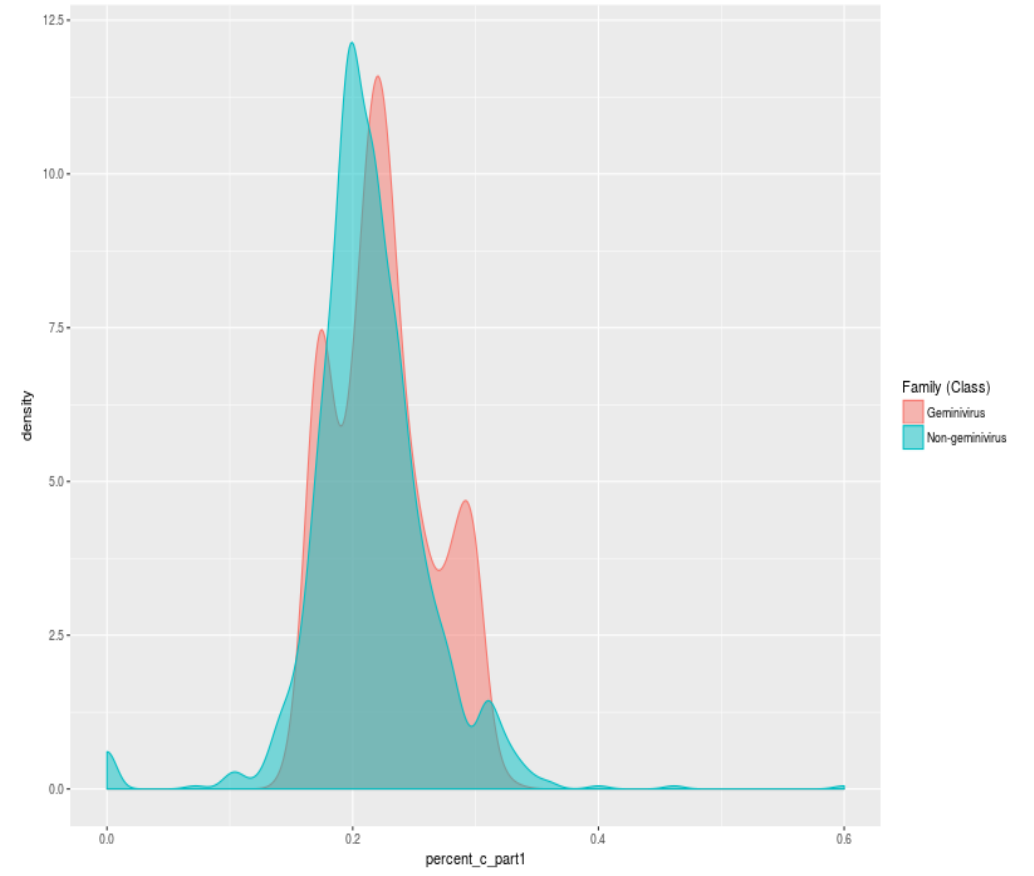

Boxplots

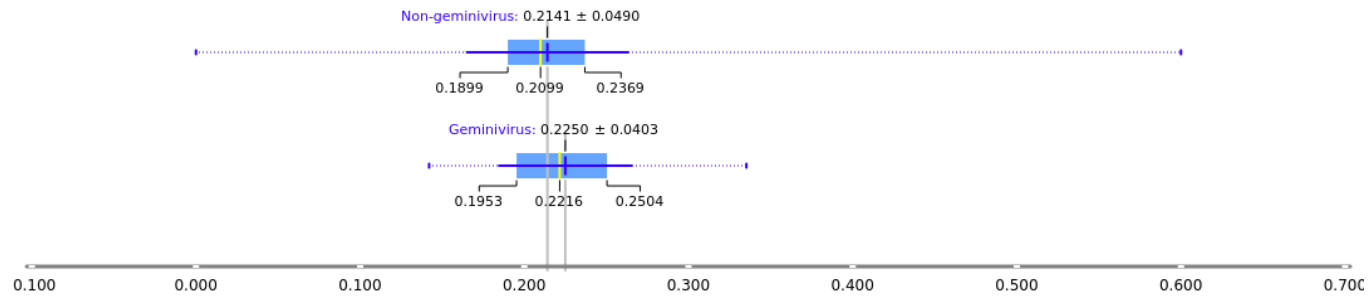



## Proportion of Cytosine in region 2

Histogram

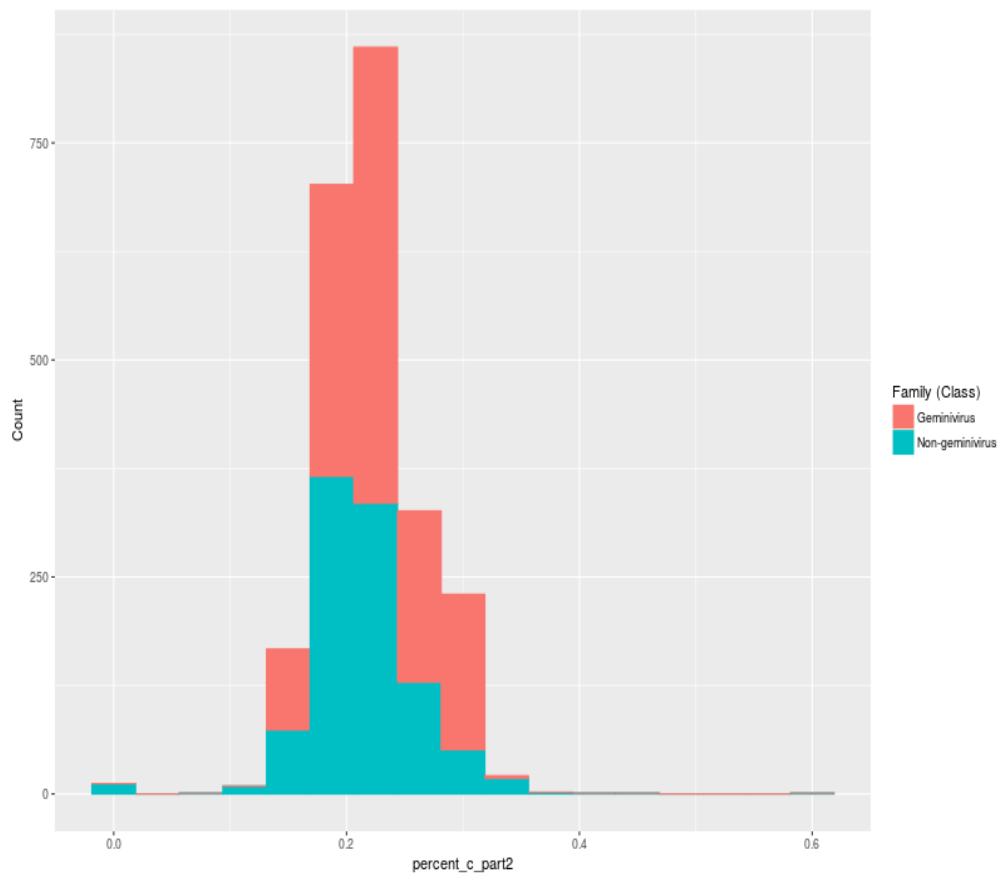

Density

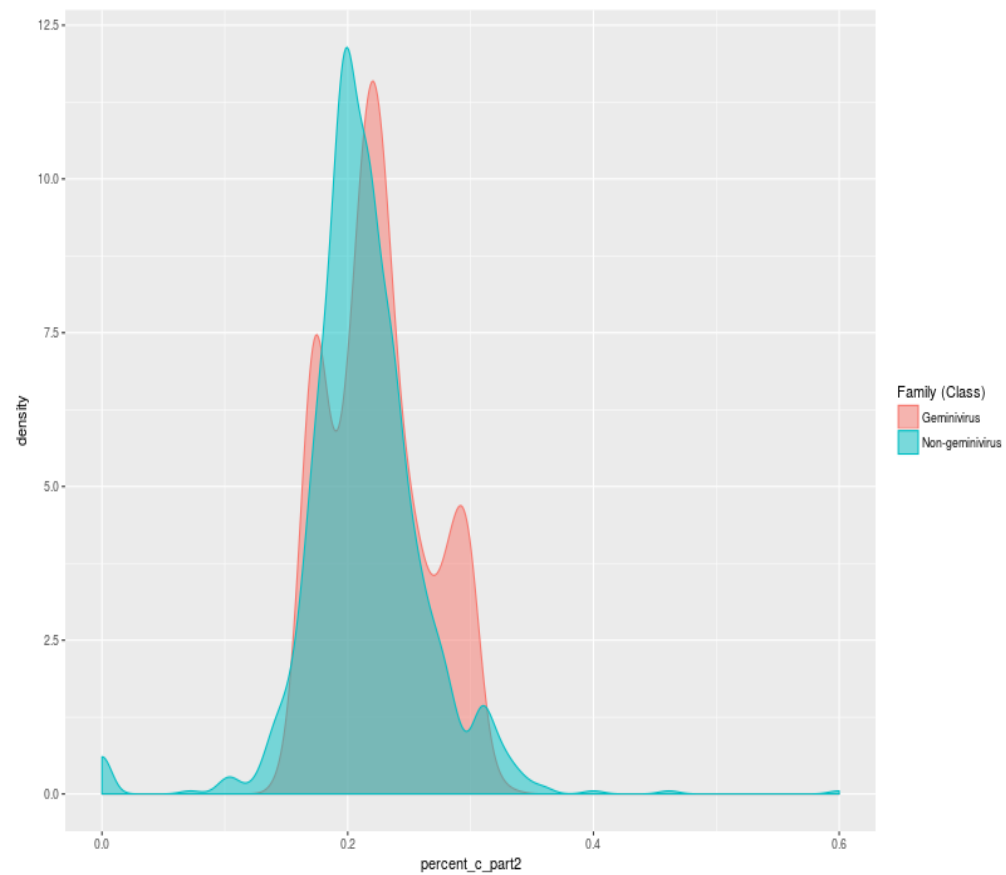

Boxplots



## Proportion of Cytosine in region 3

Histogram

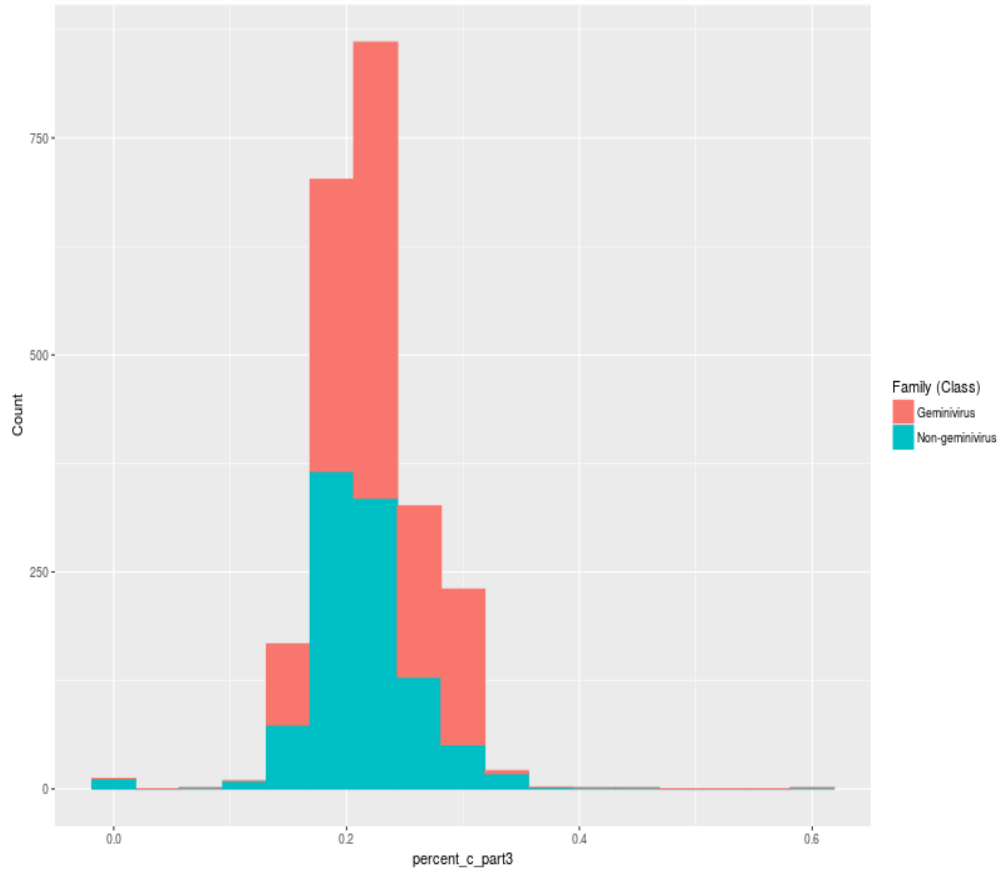

Density

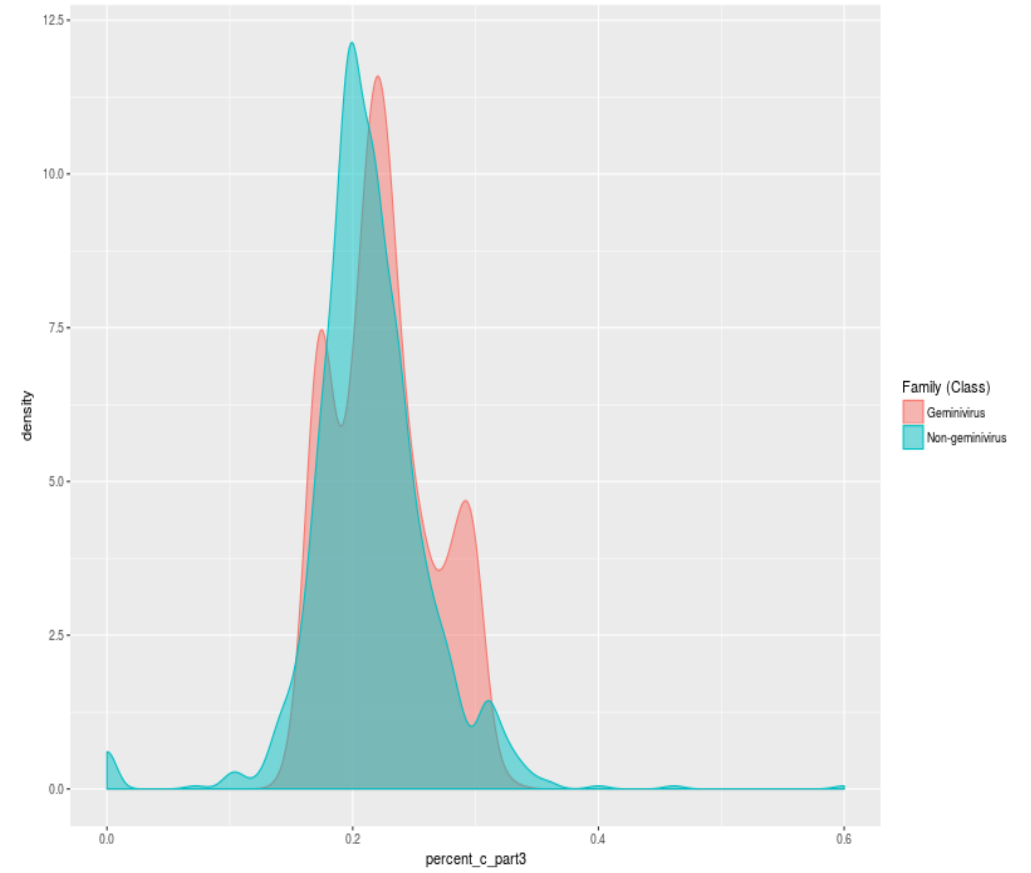

Boxplots



## Proportion of Cytosine in region 4

Histogram

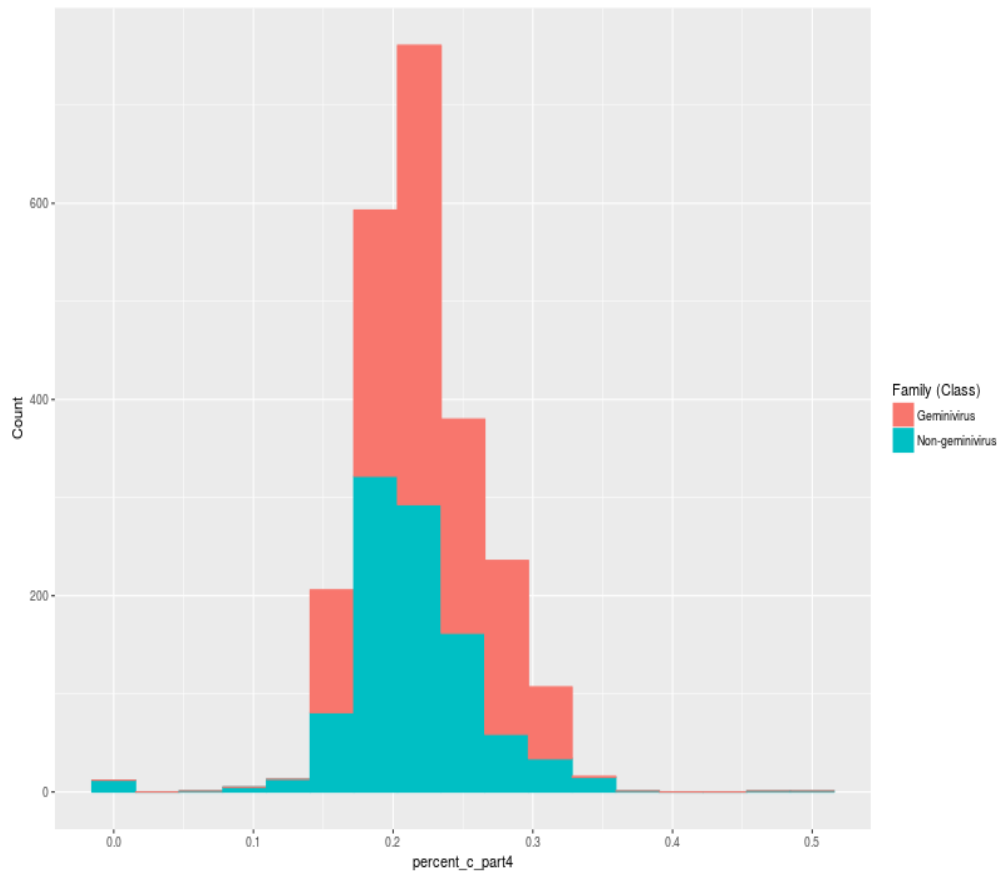

Density

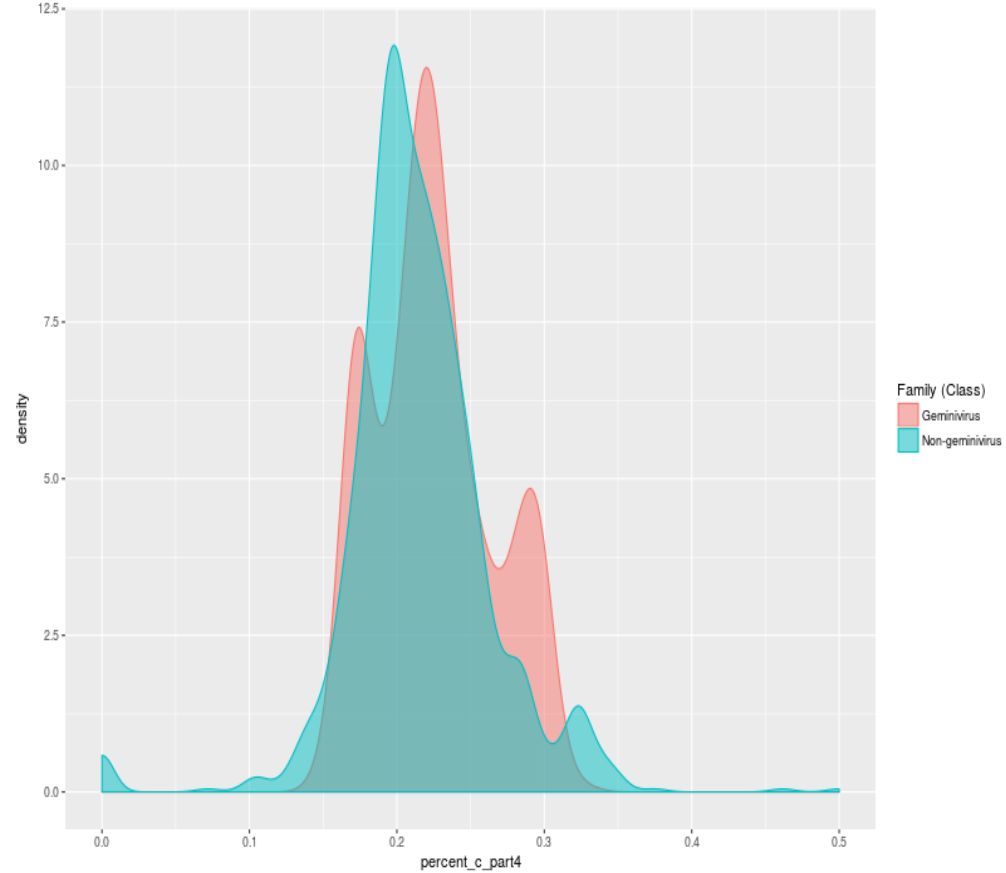

Boxplots

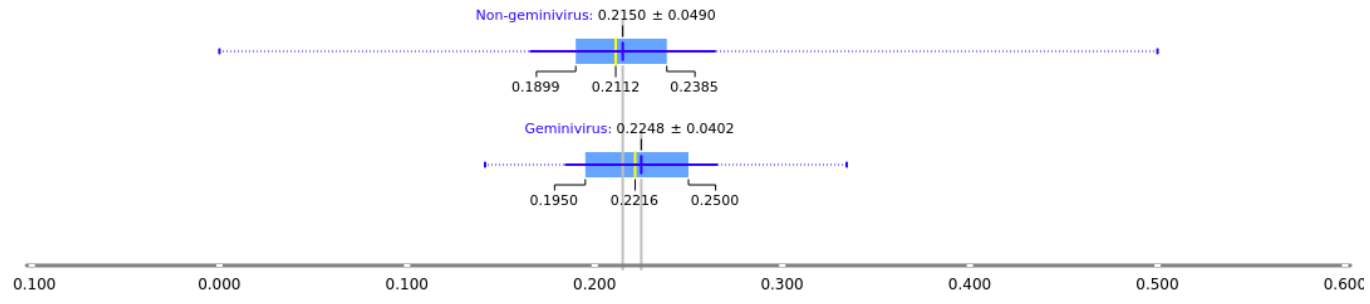

# Proportion of Guanine and Cytosine in region 1

Histogram

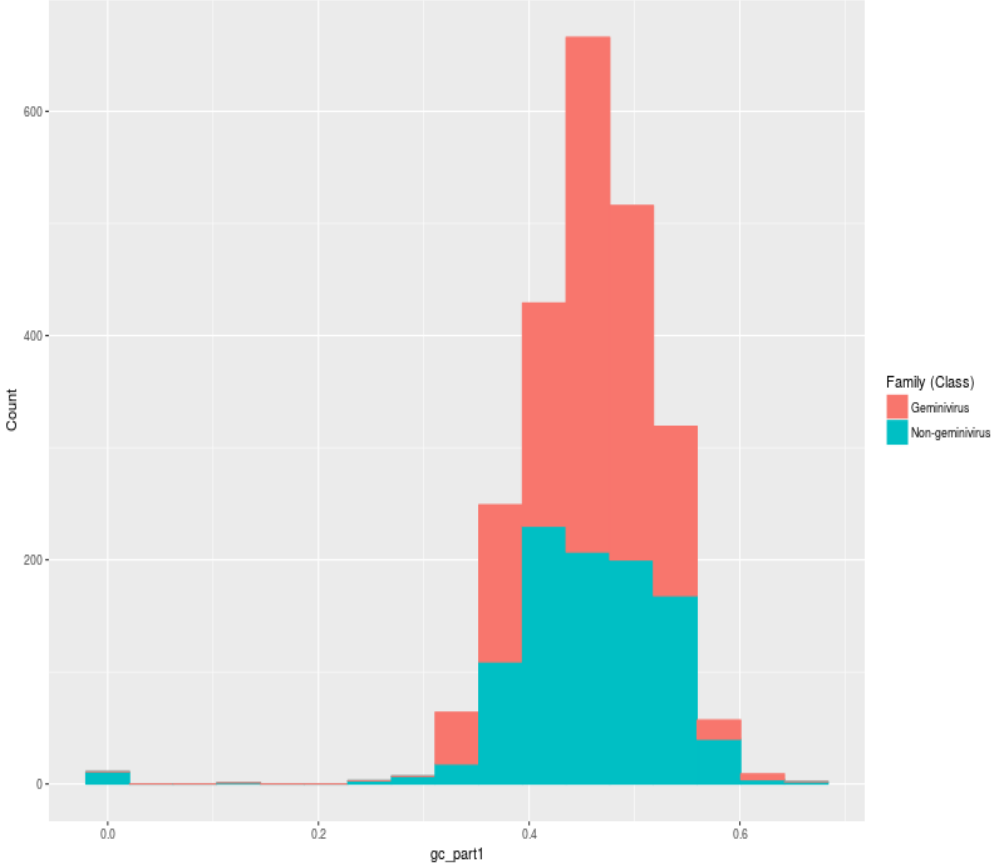

Density

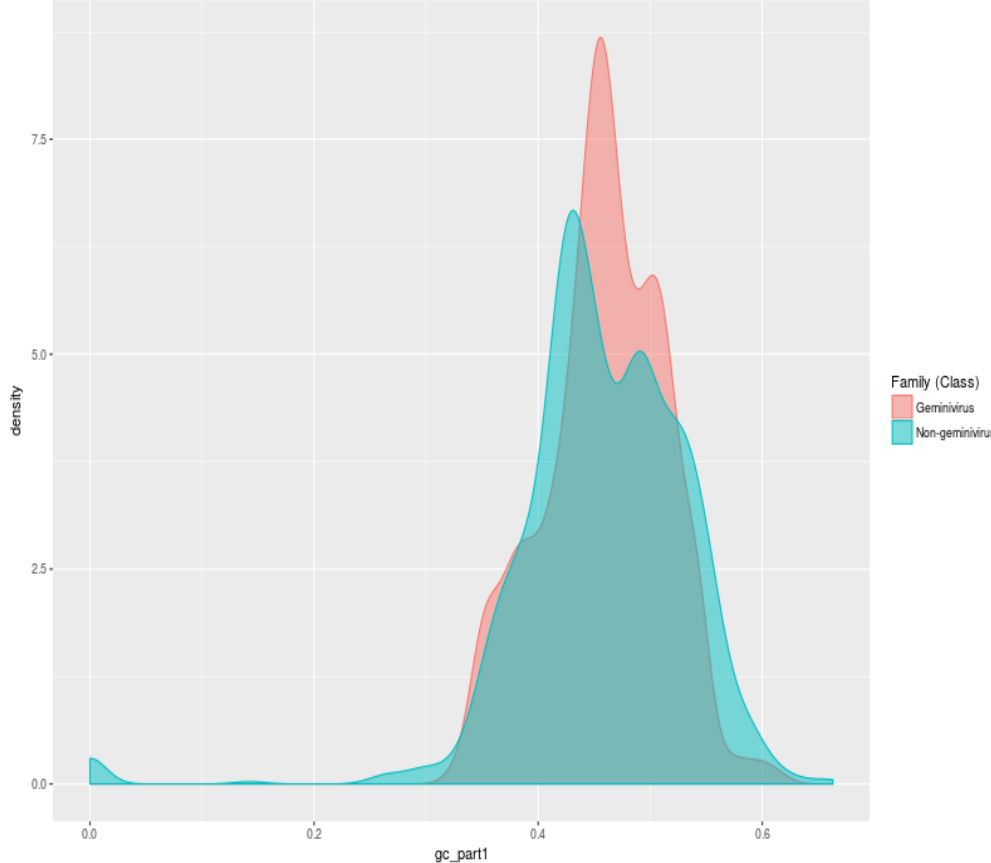

Boxplots

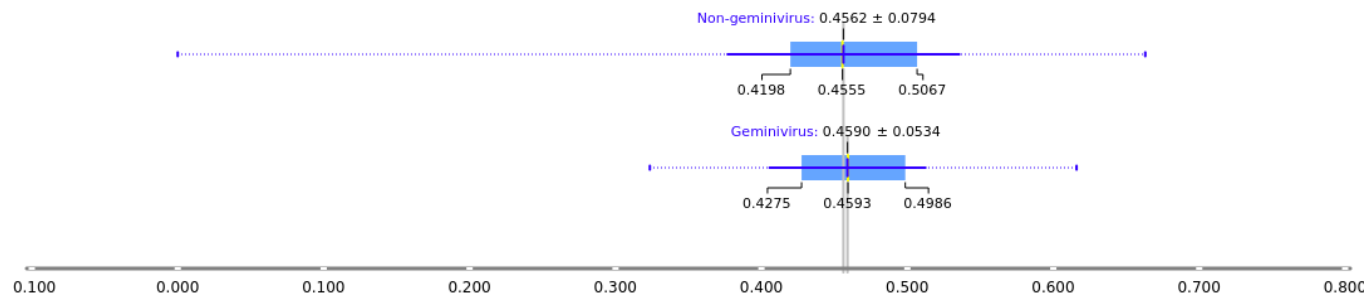



## Proportion of Guanine and Cytosine in region 2

Histogram

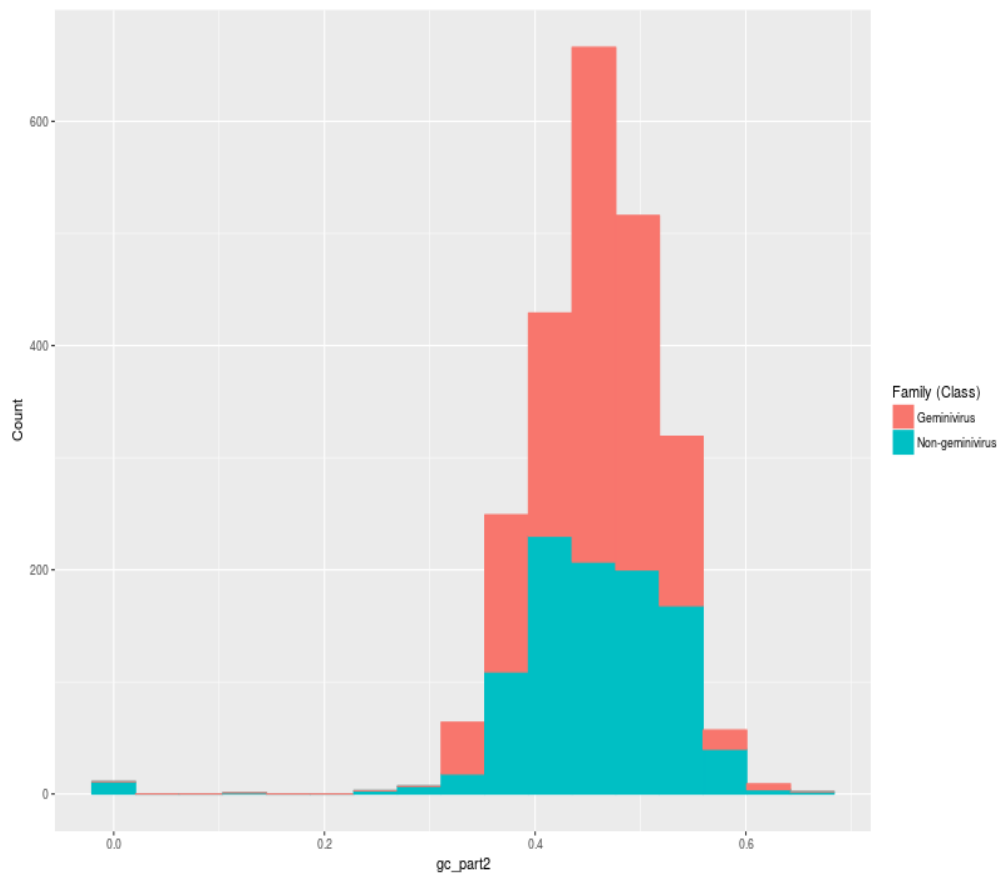

Density

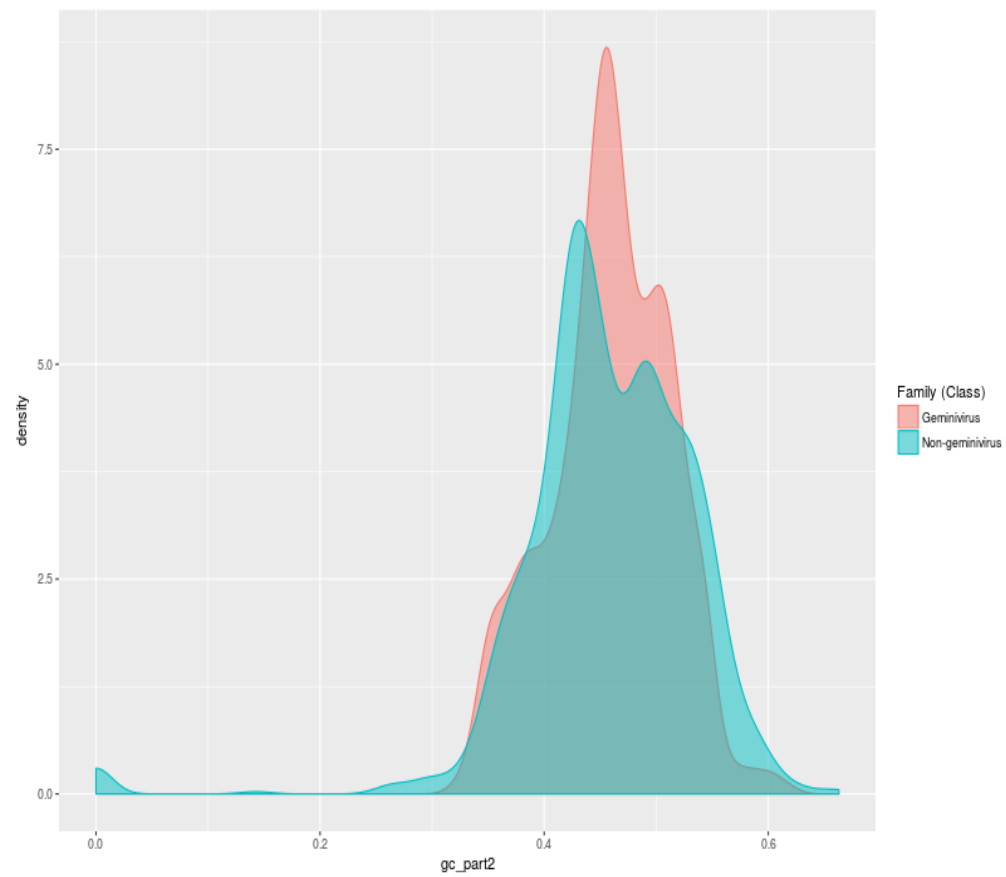

Boxplots

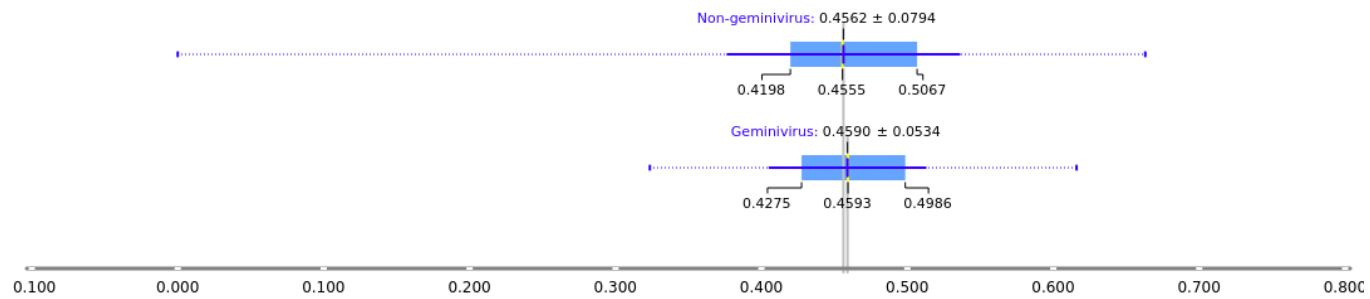

### Proportion of Guanine and Cytosine in region 3

Histogram

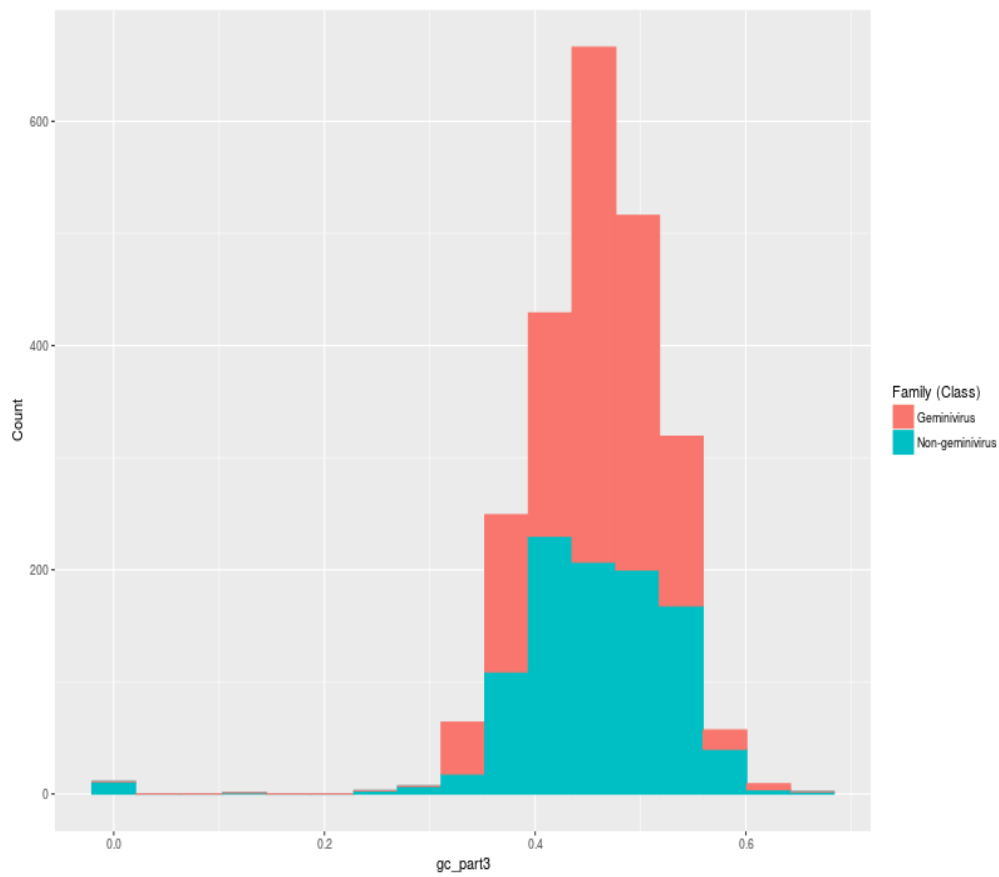

Density

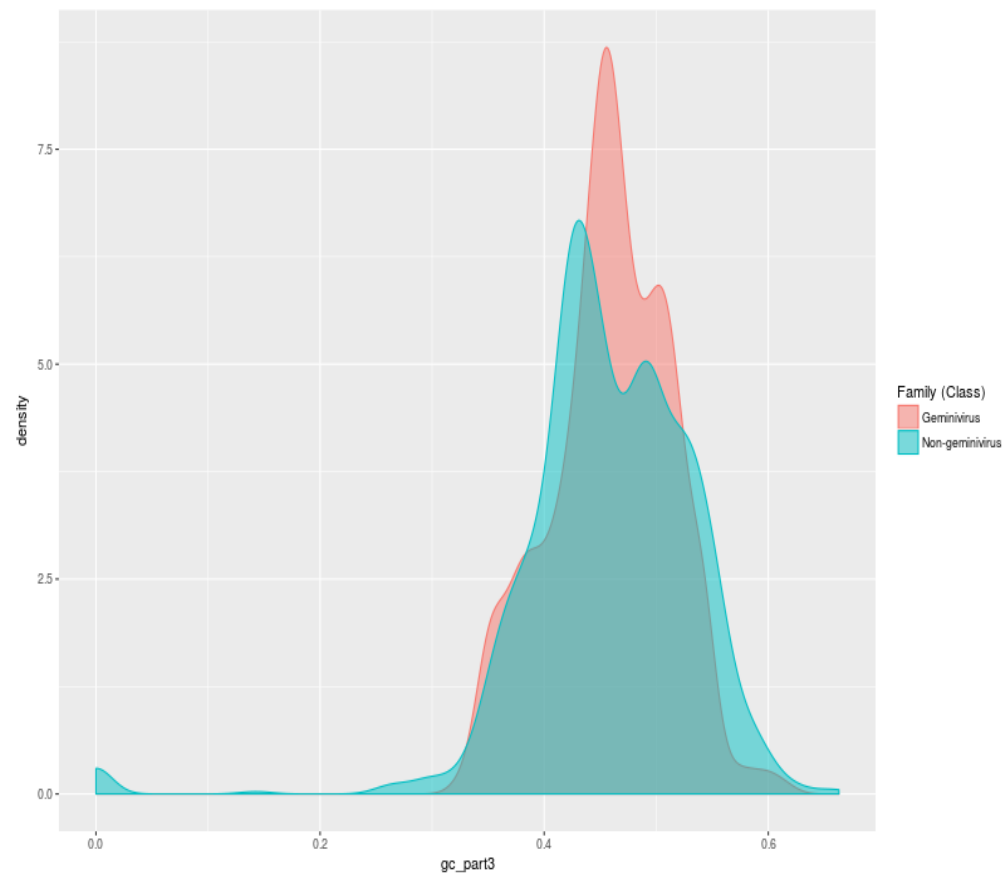

Boxplots



## Proportion of Guanine and Cytosine in region 4

Histogram

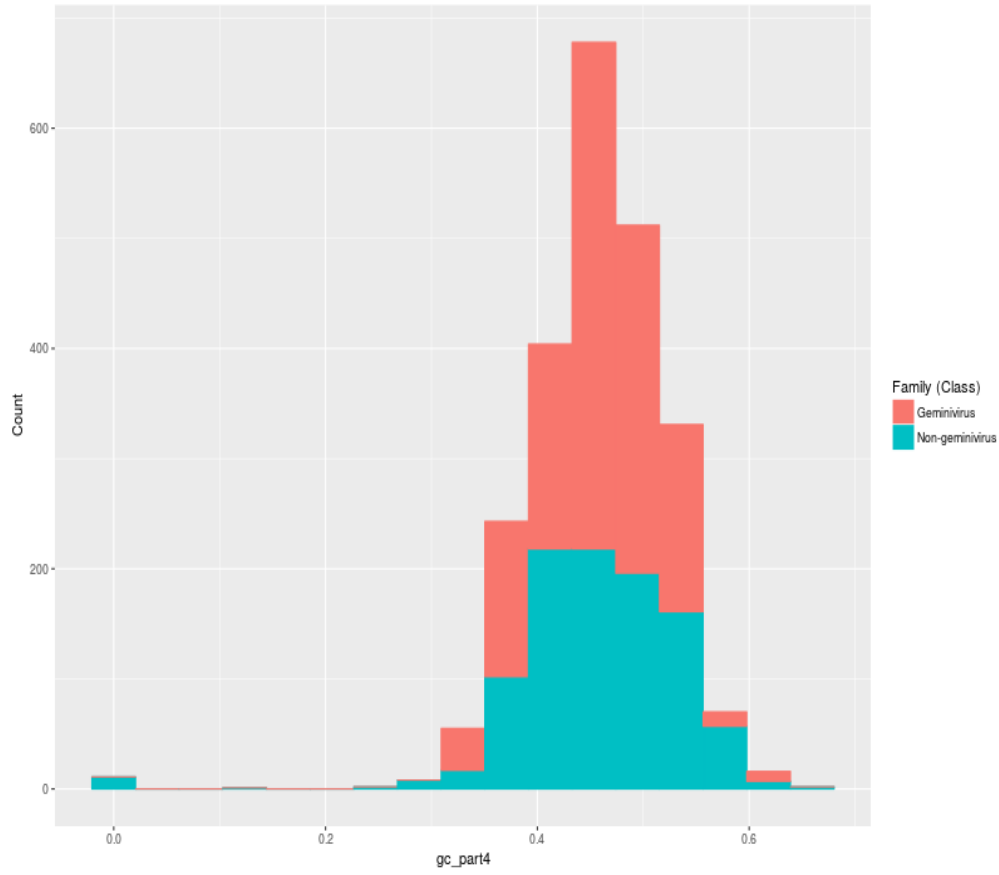

Density

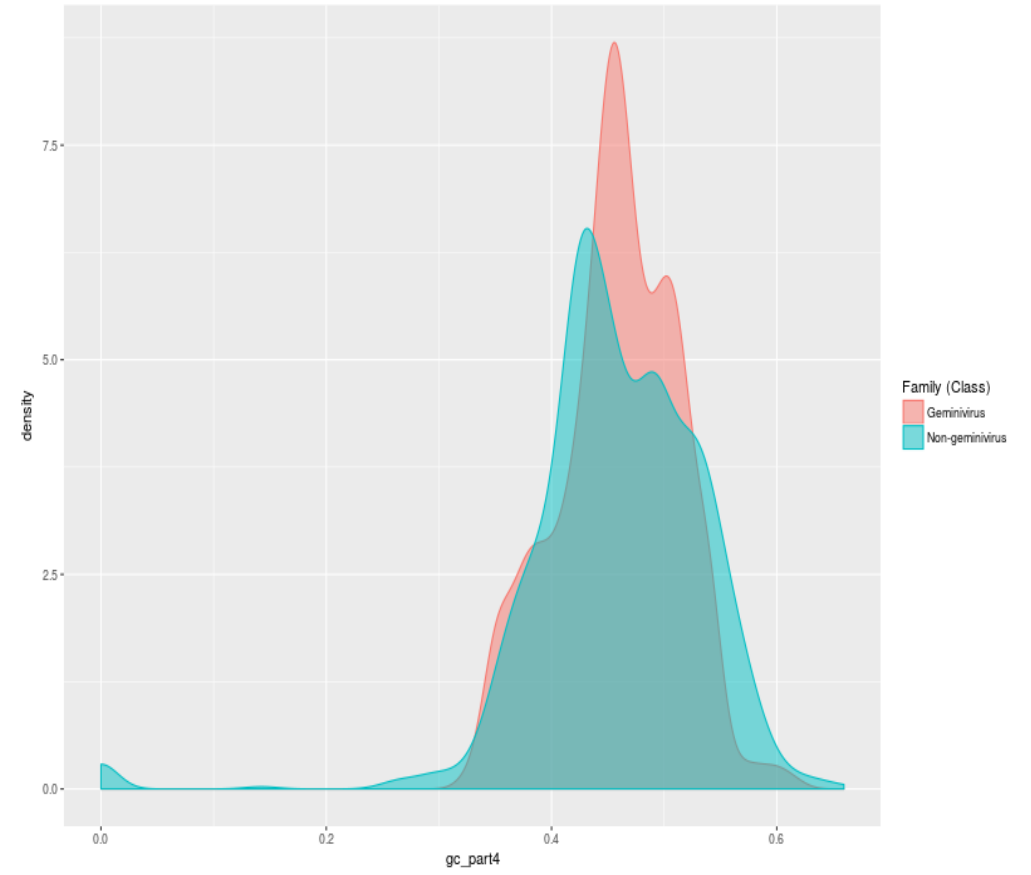

Boxplots

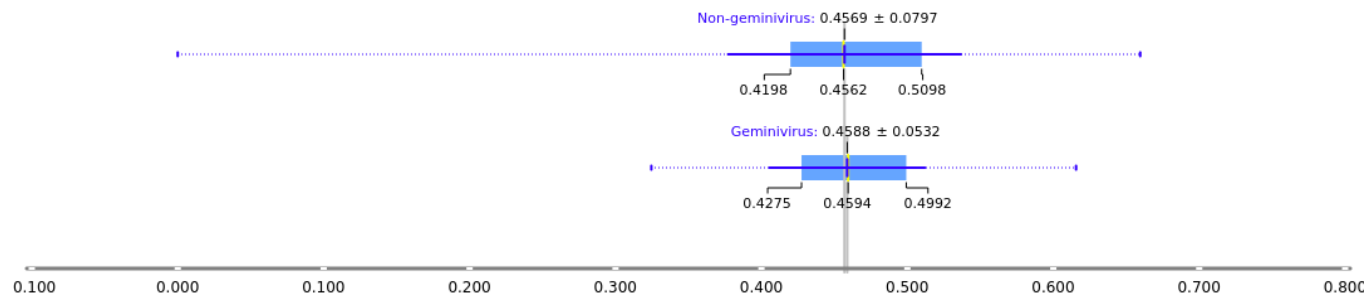

# Charts of genus attributes

## Proportion of Guanine in the genome

Histogram

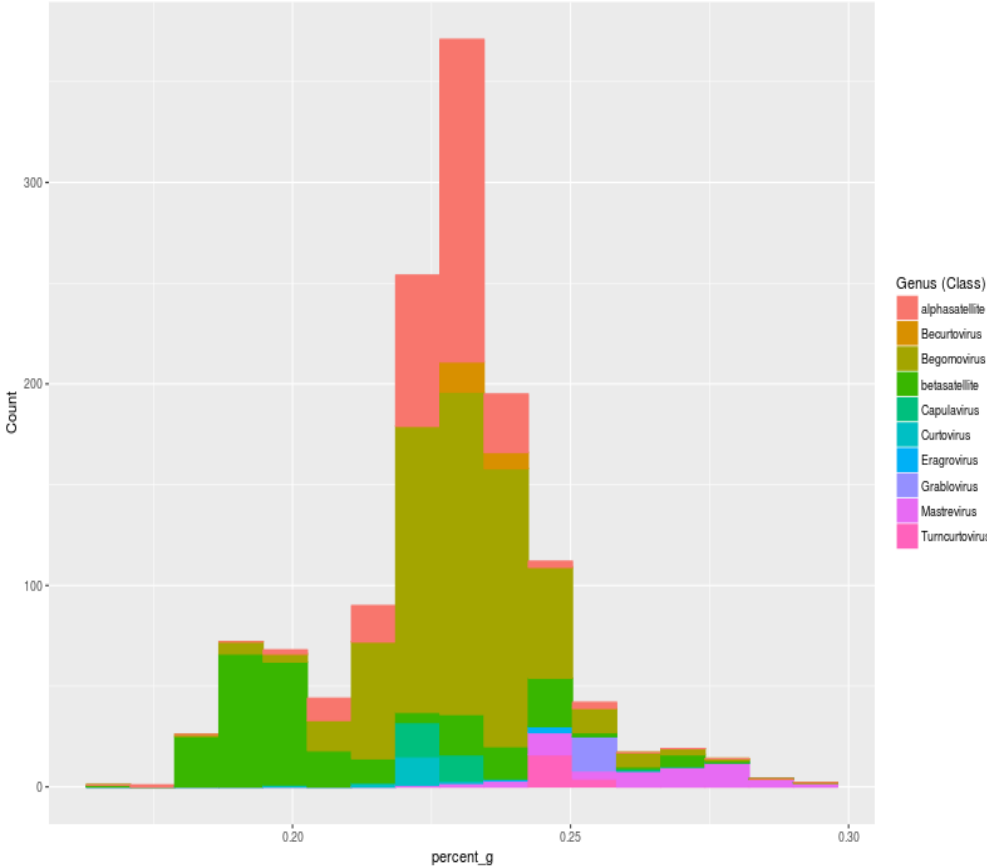

Density

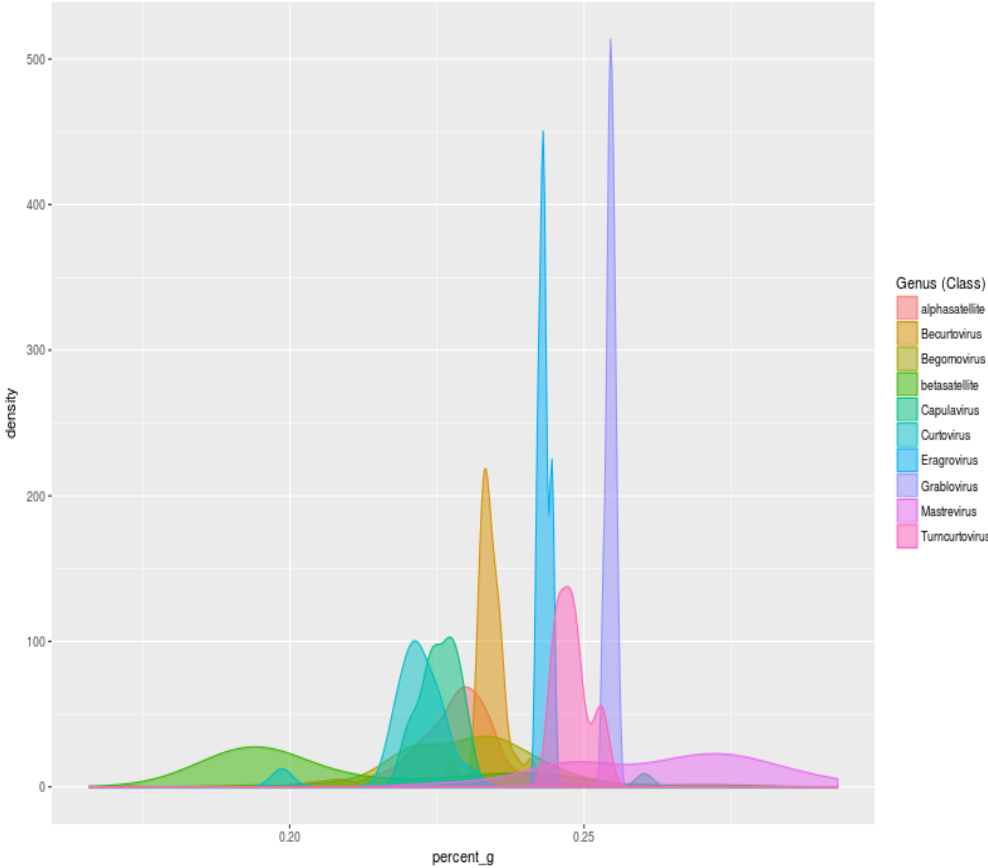

Boxplots

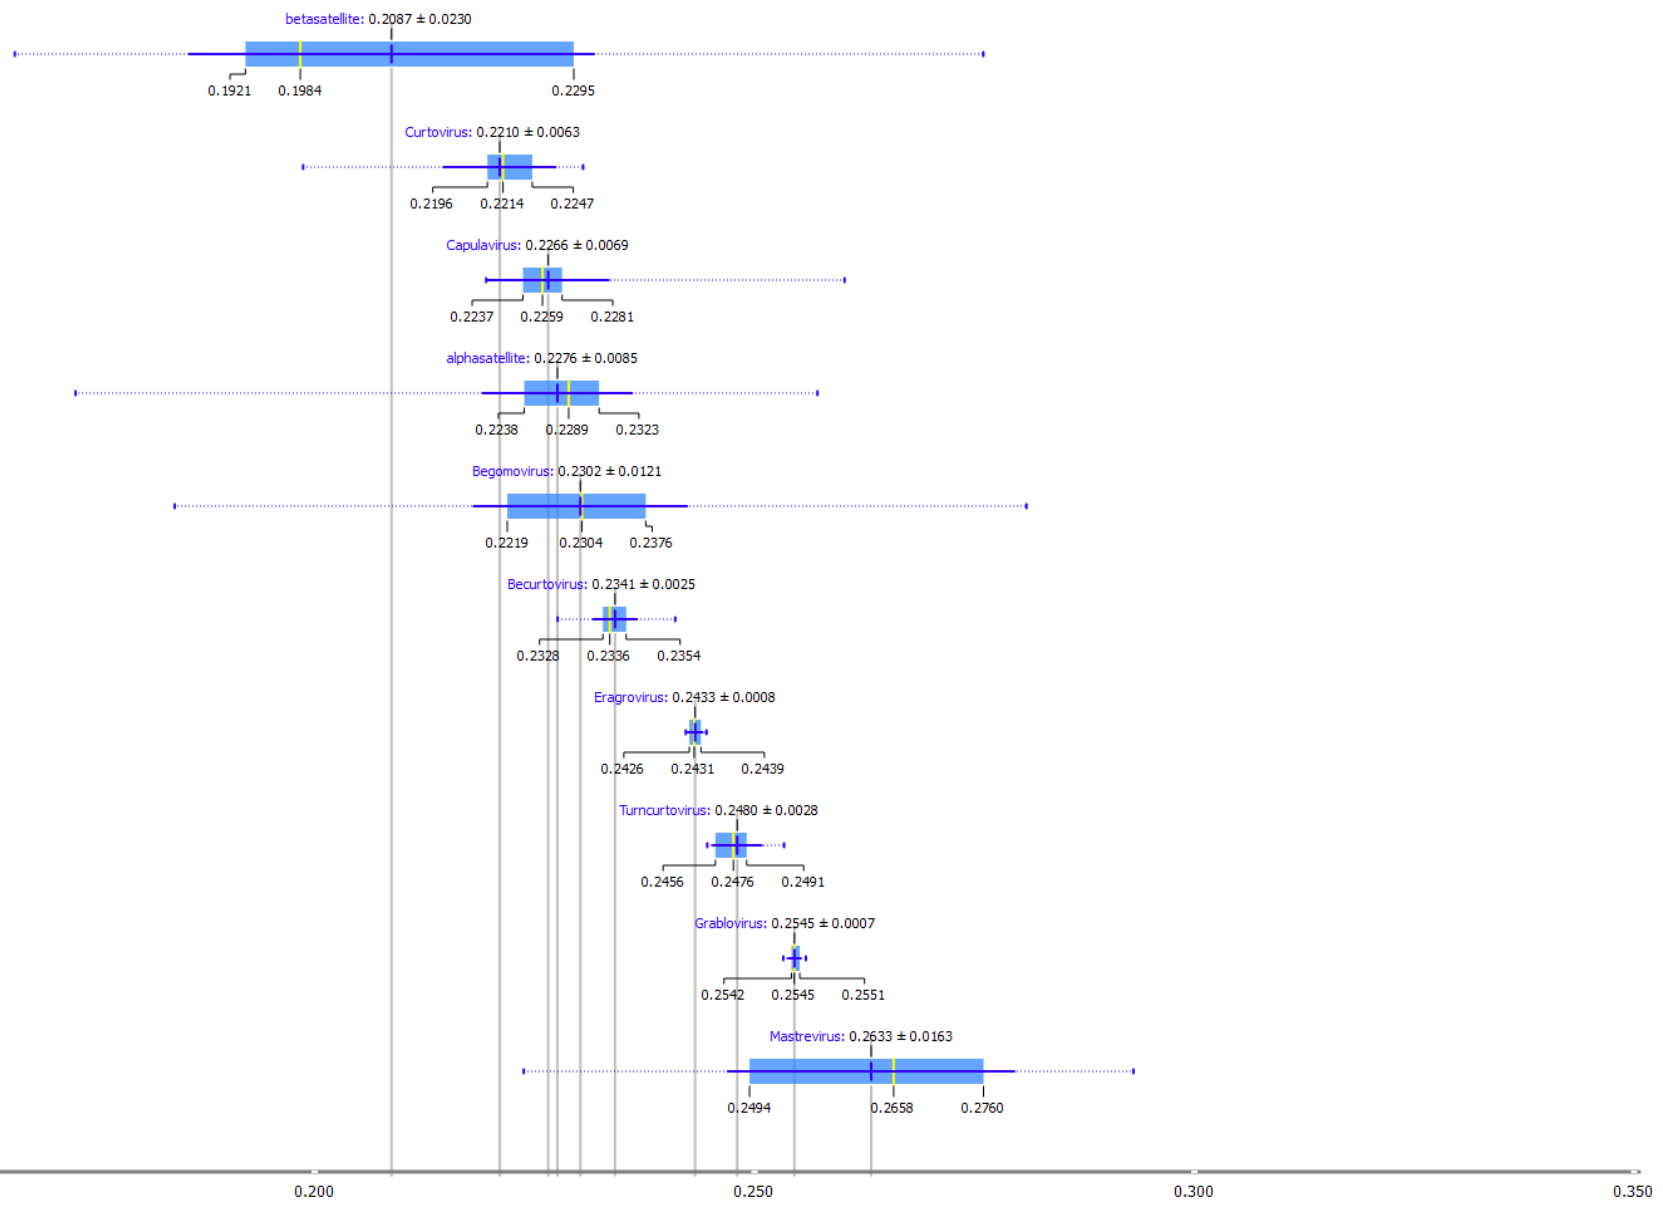



# Proportion of Guanine in region 1

Histogram

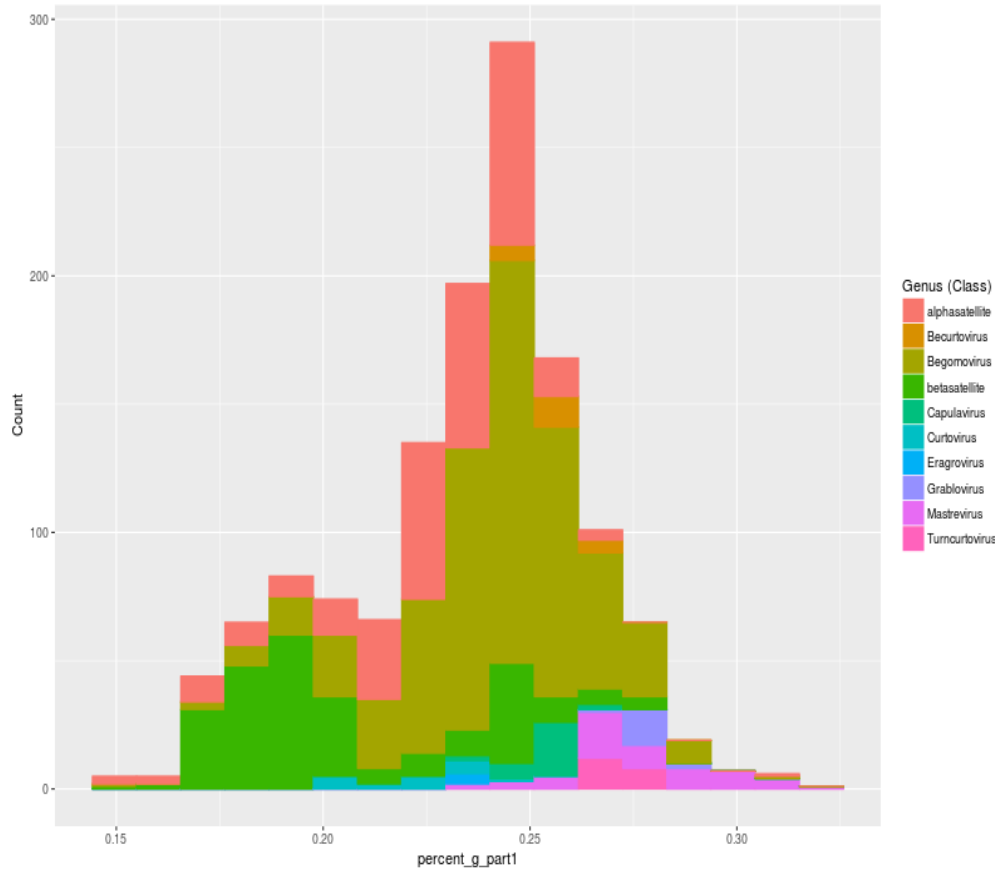

Density

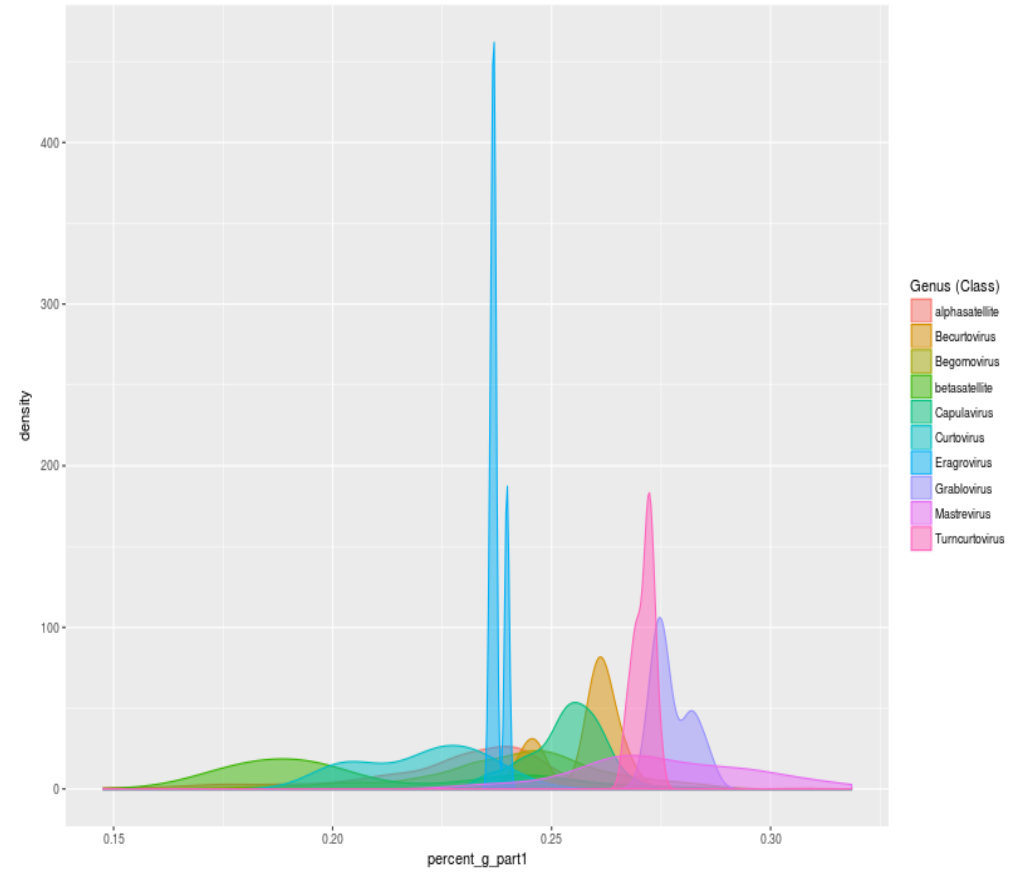

Boxplots

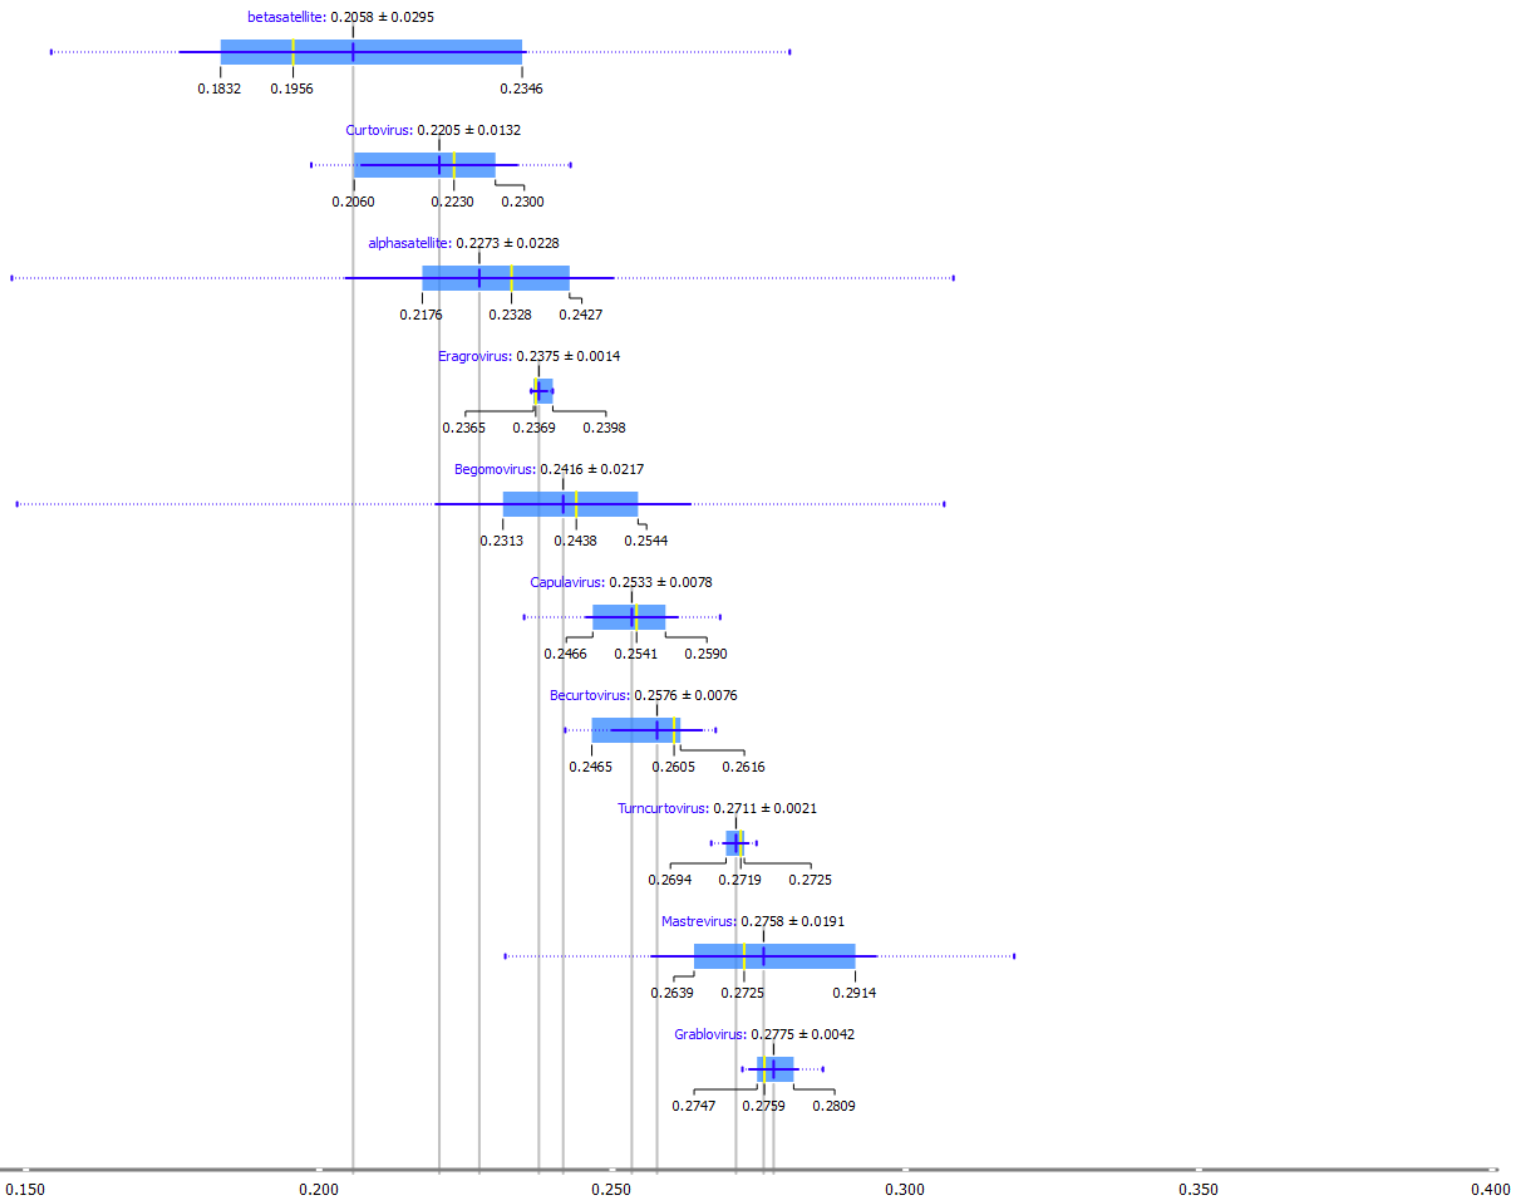



Boxplots

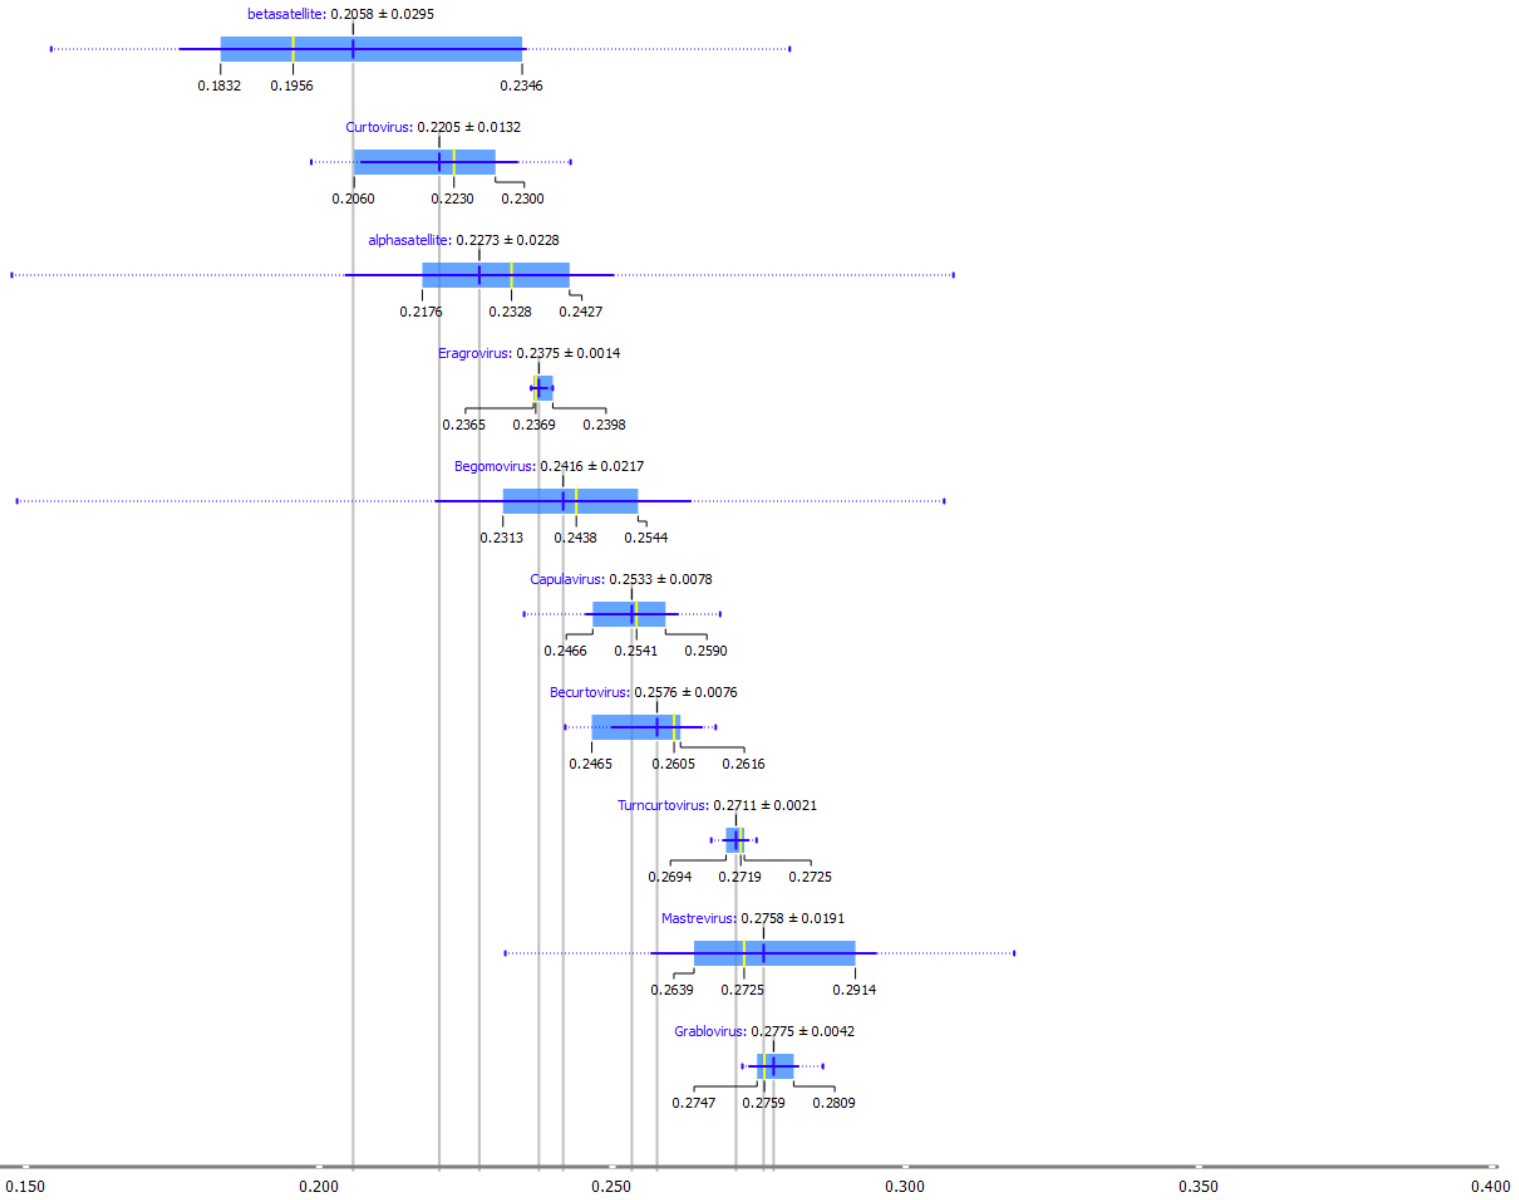



Boxplots





Boxplots

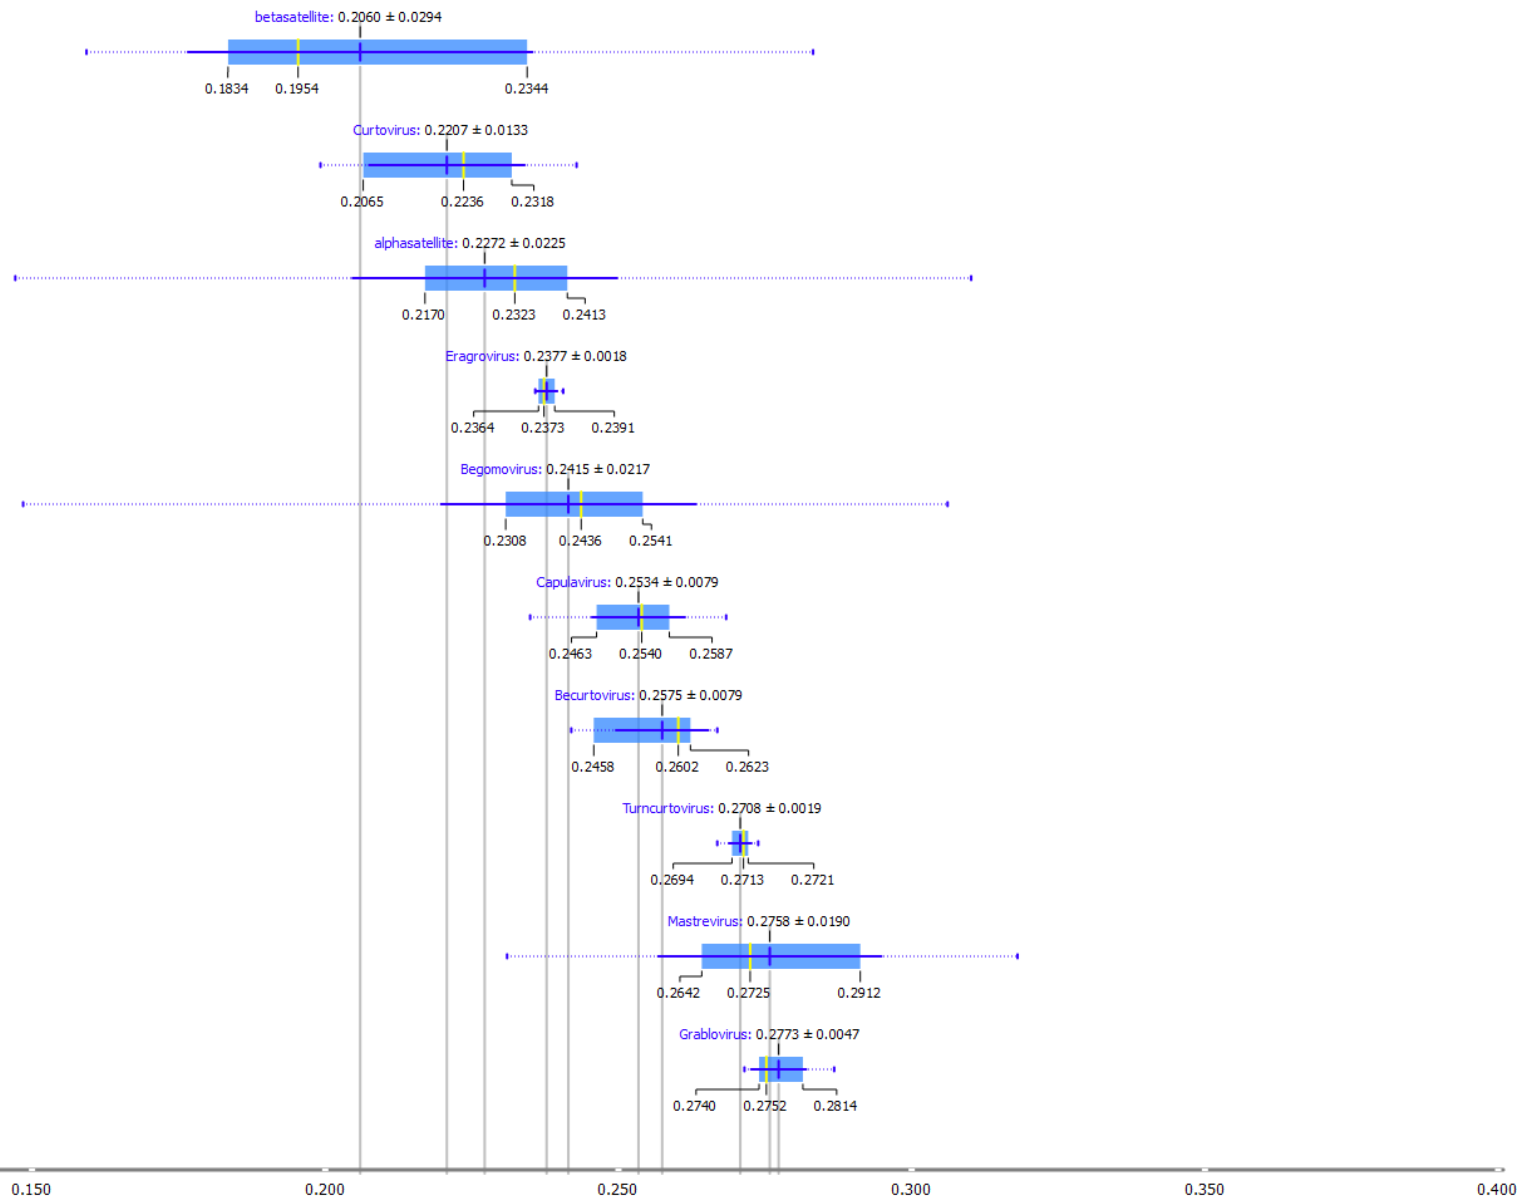



# Proportion of Adenine in the genome

Histogram

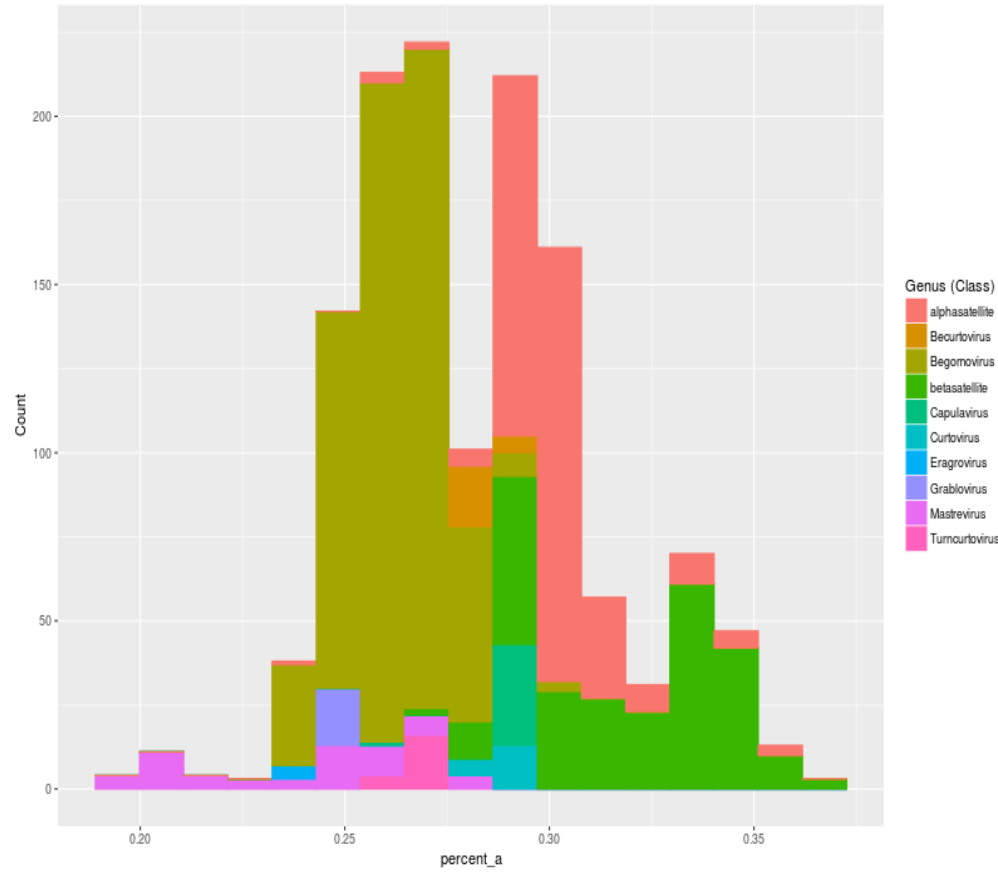

Density

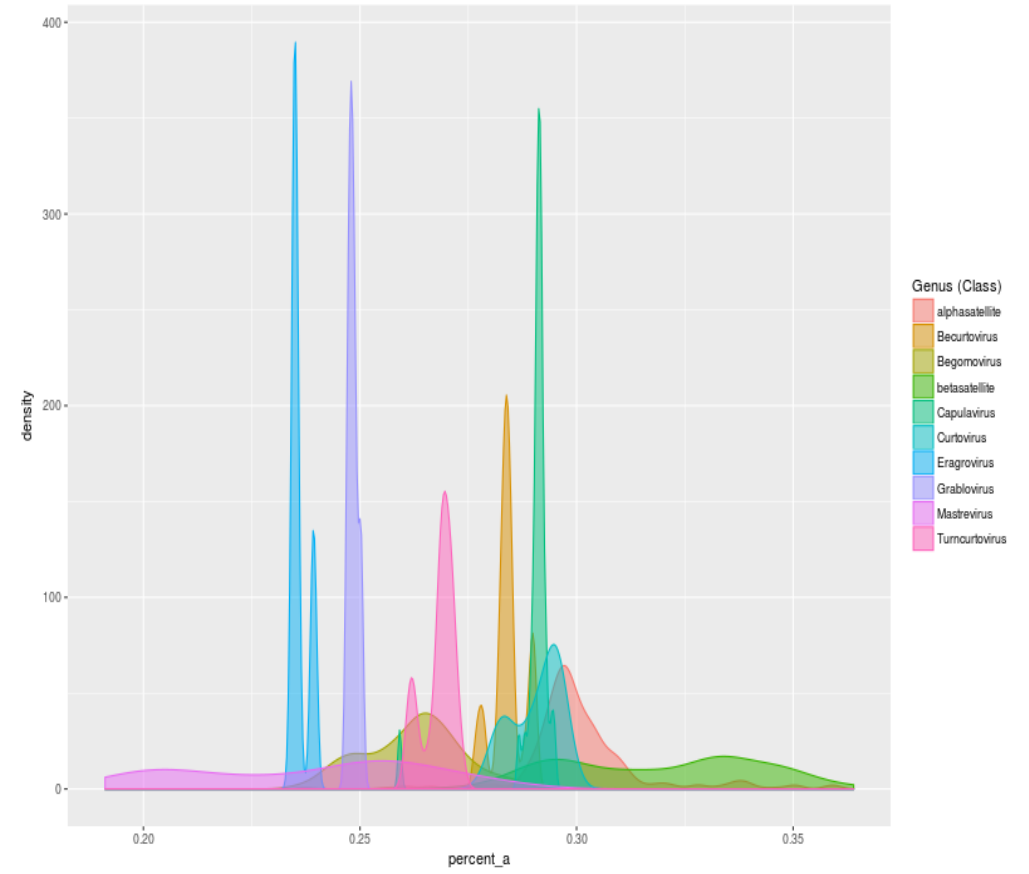

Boxplots

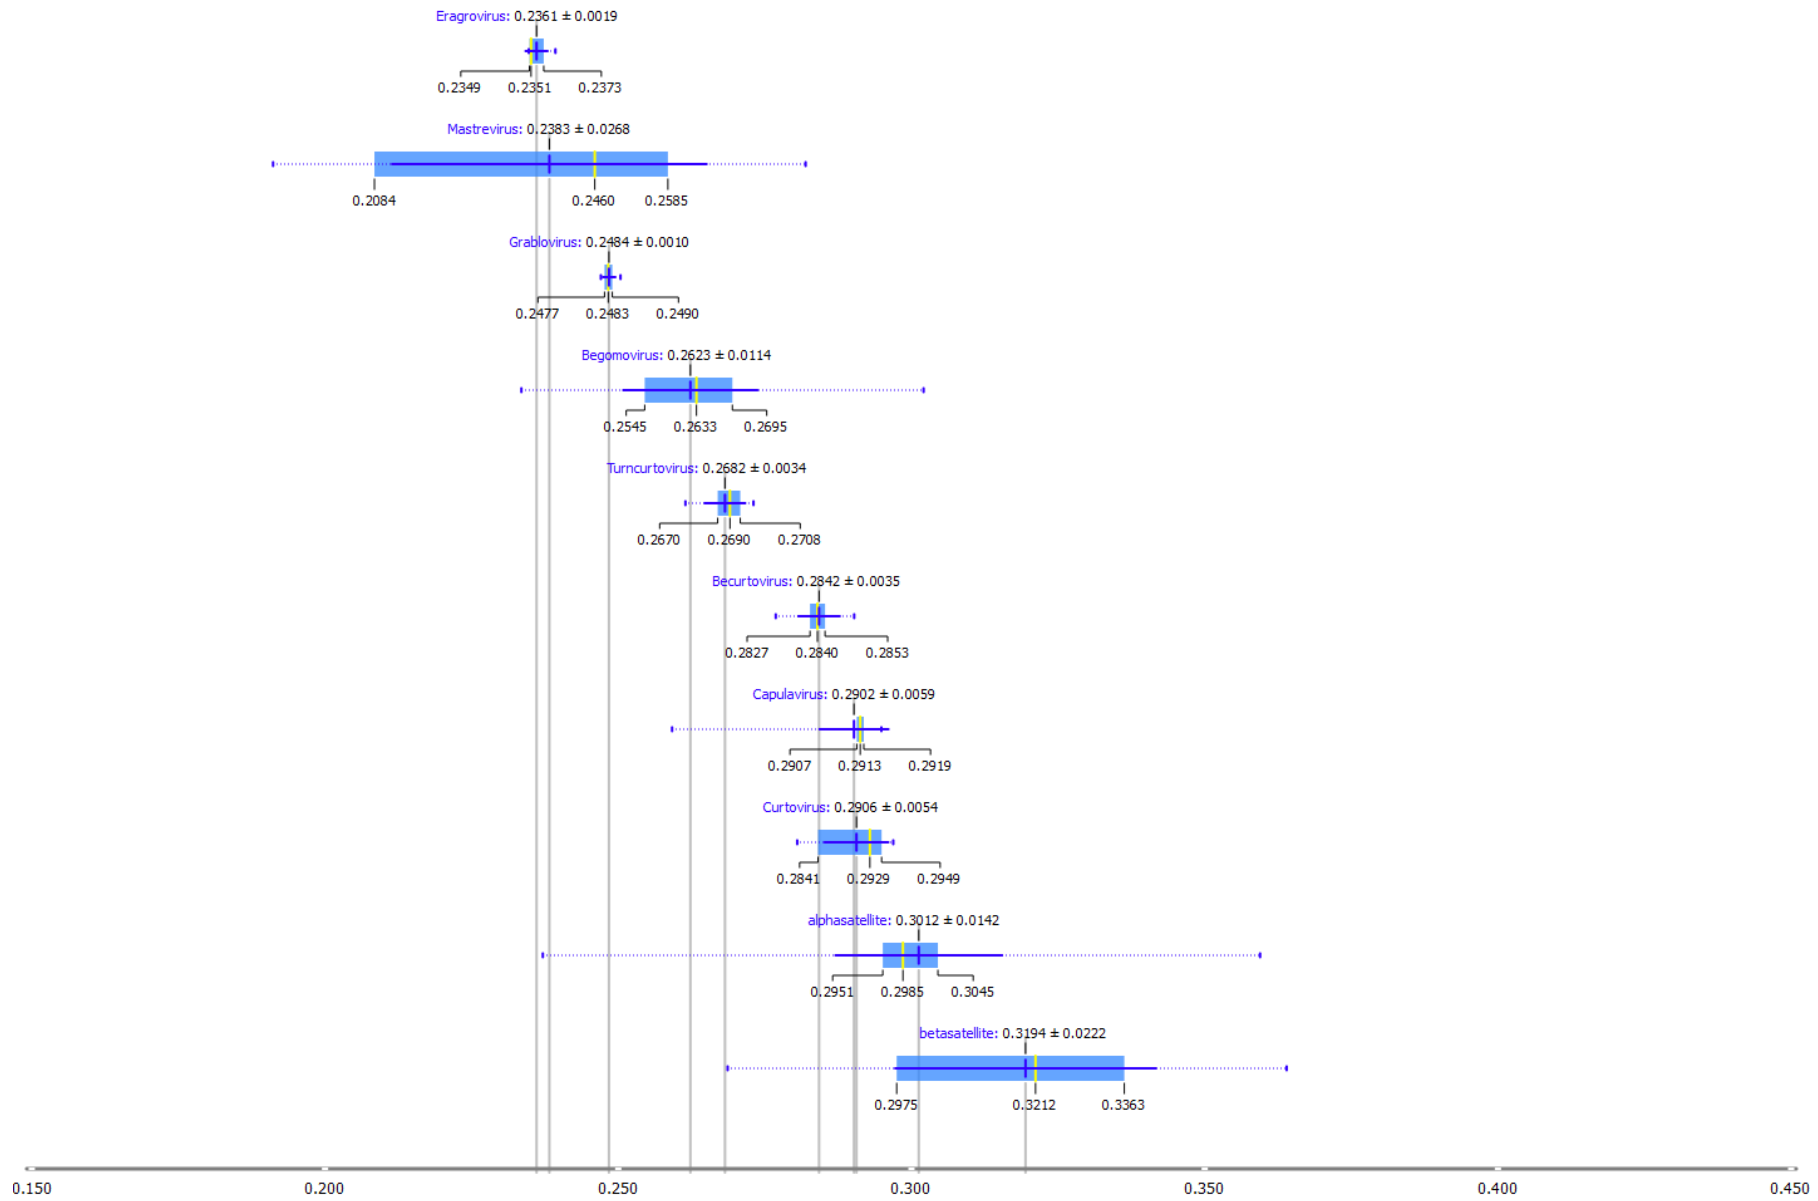

# Proportion of Adenine in region 1

## Histogram

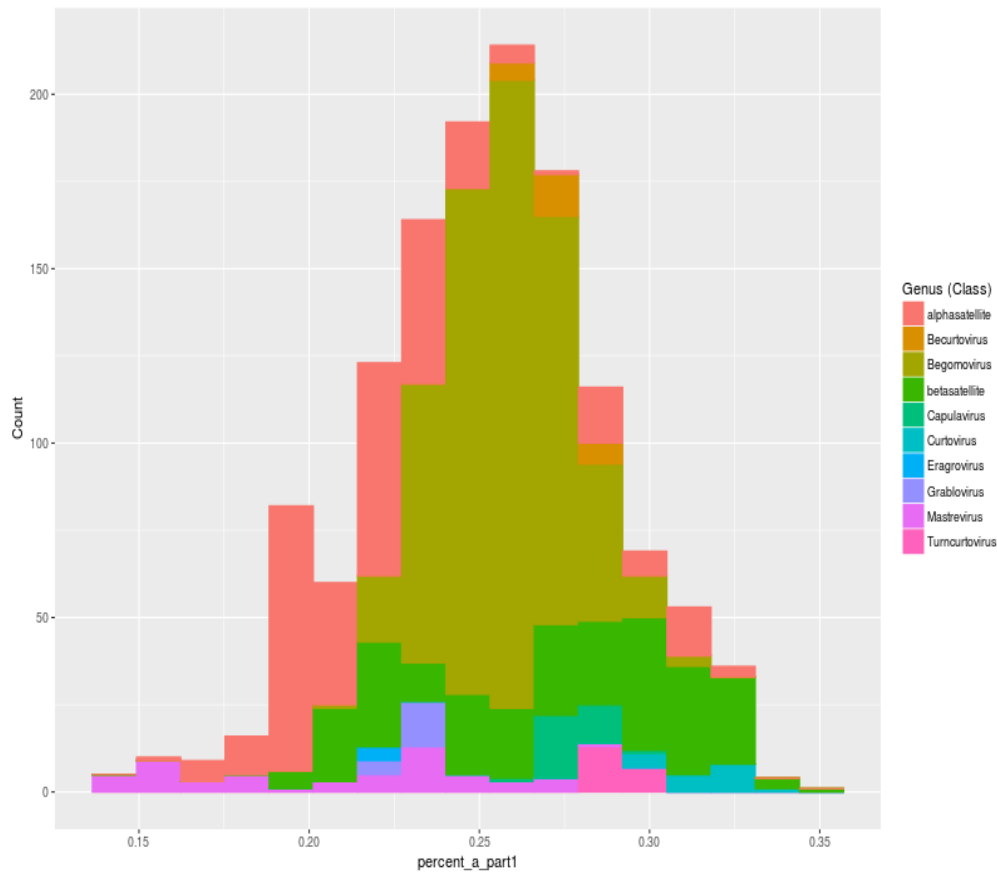

## Density

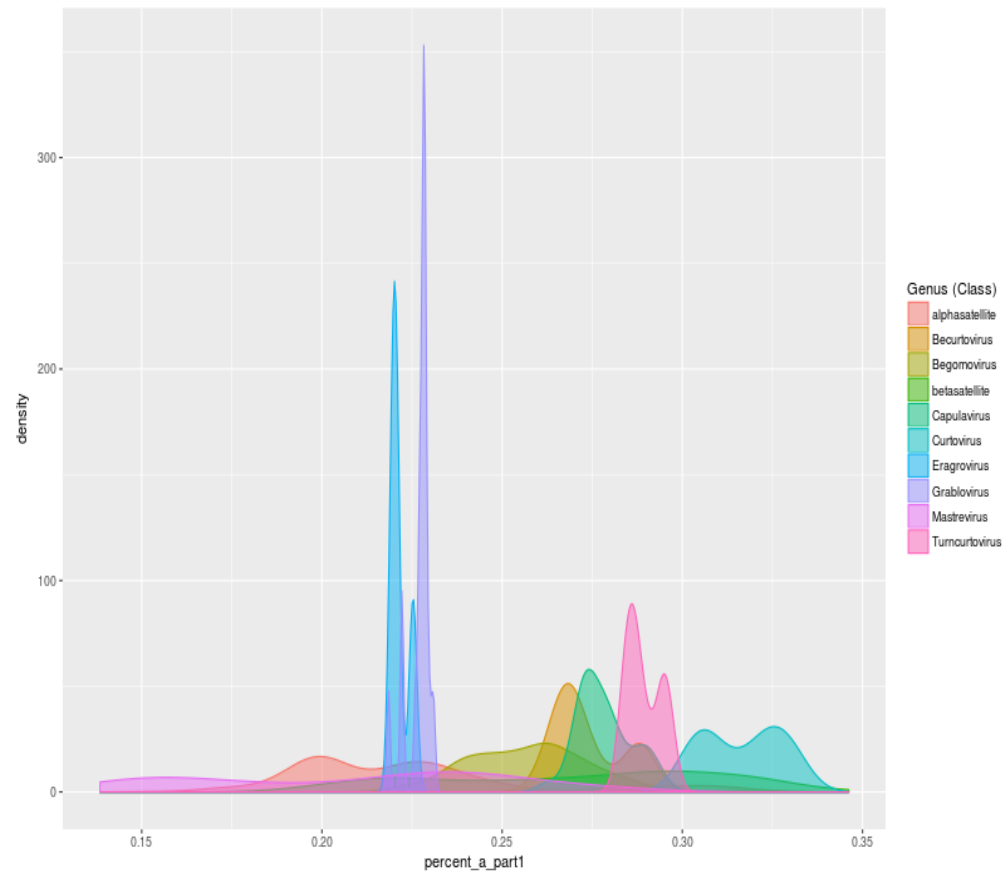

Boxplots

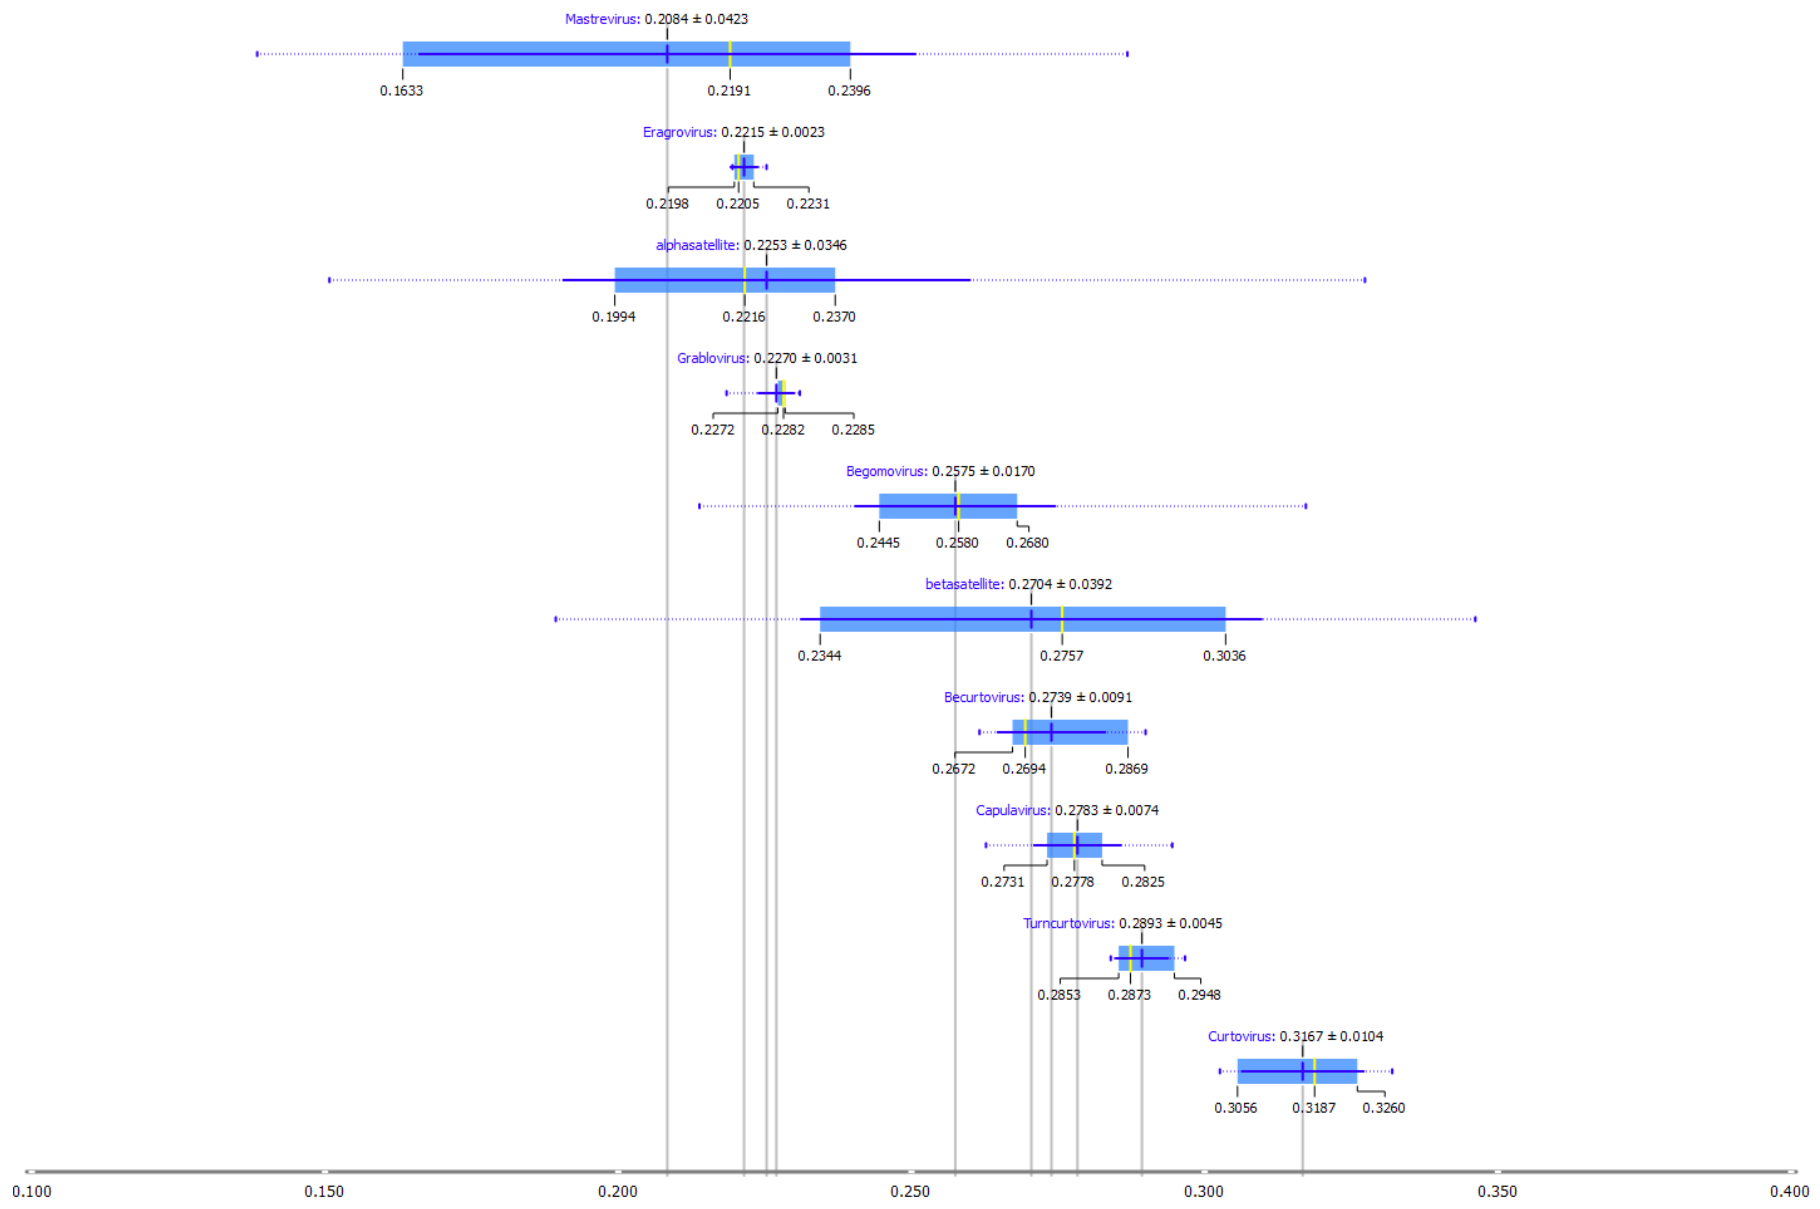

## Proportion of Adenine in region 2

Histogram

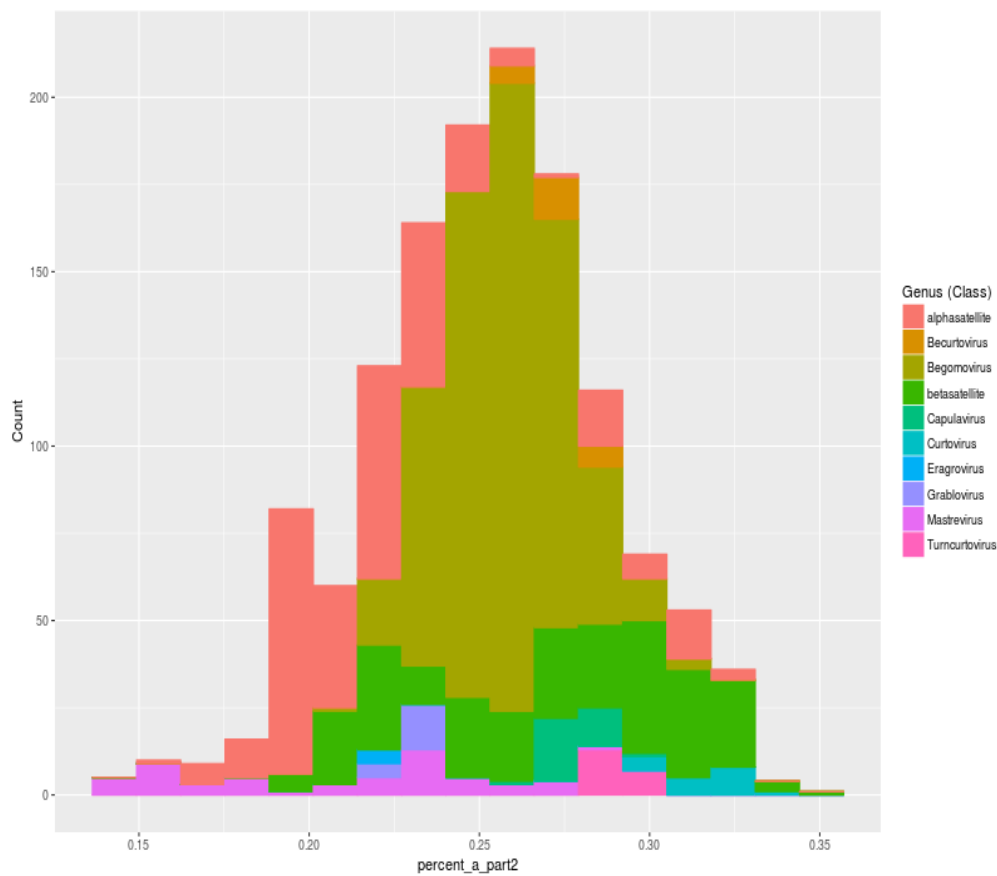

Density

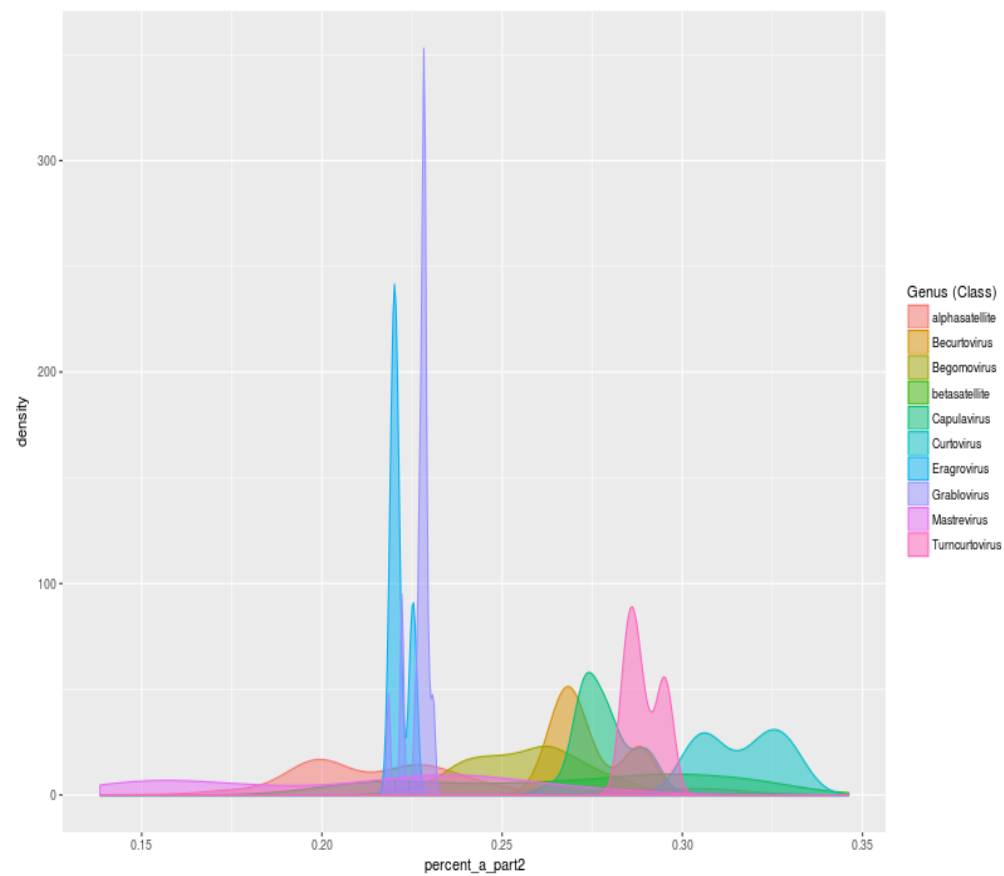

Boxplots



## Proportion of Adenine in region 3

Histogram

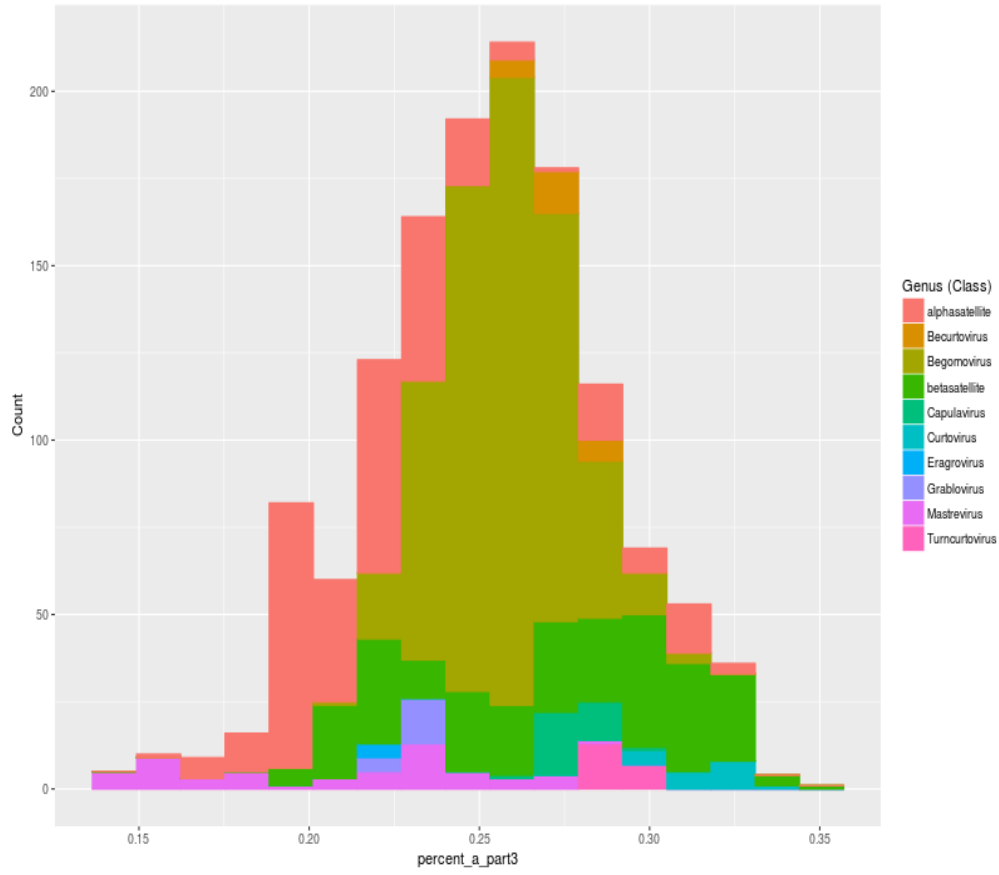

Density

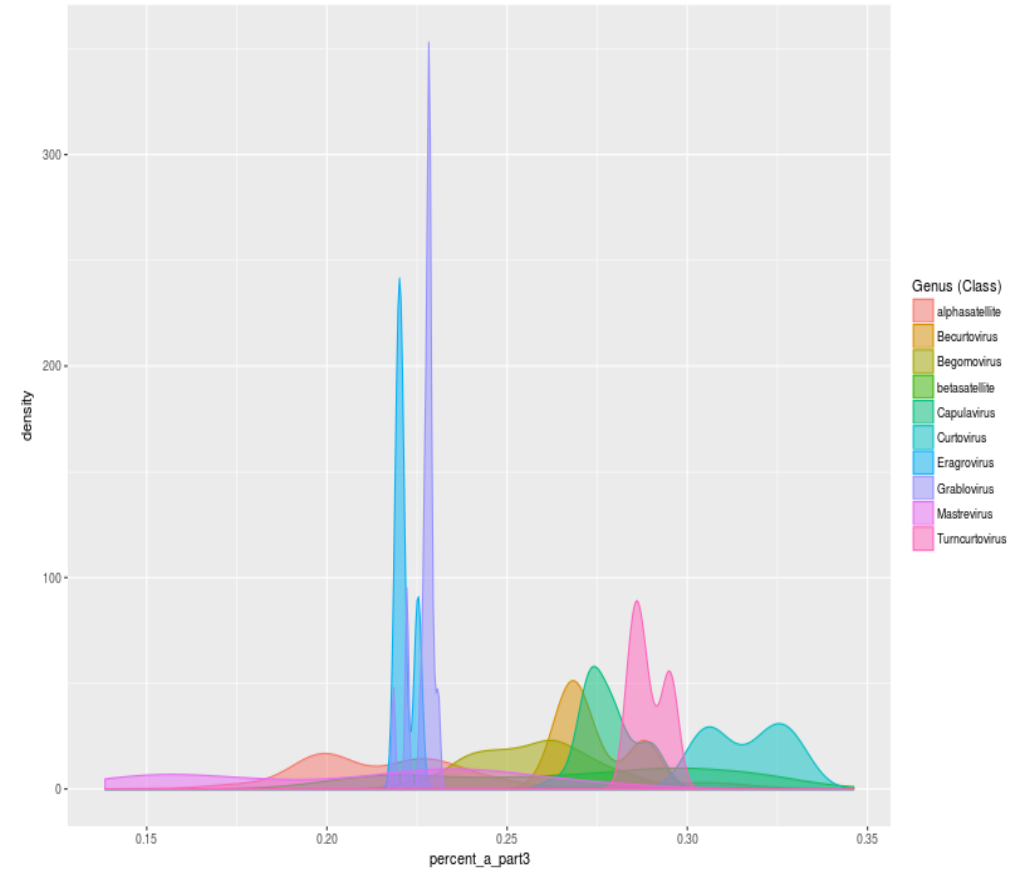

Boxplots





## Proportion of Adenine in region 4

Histogram

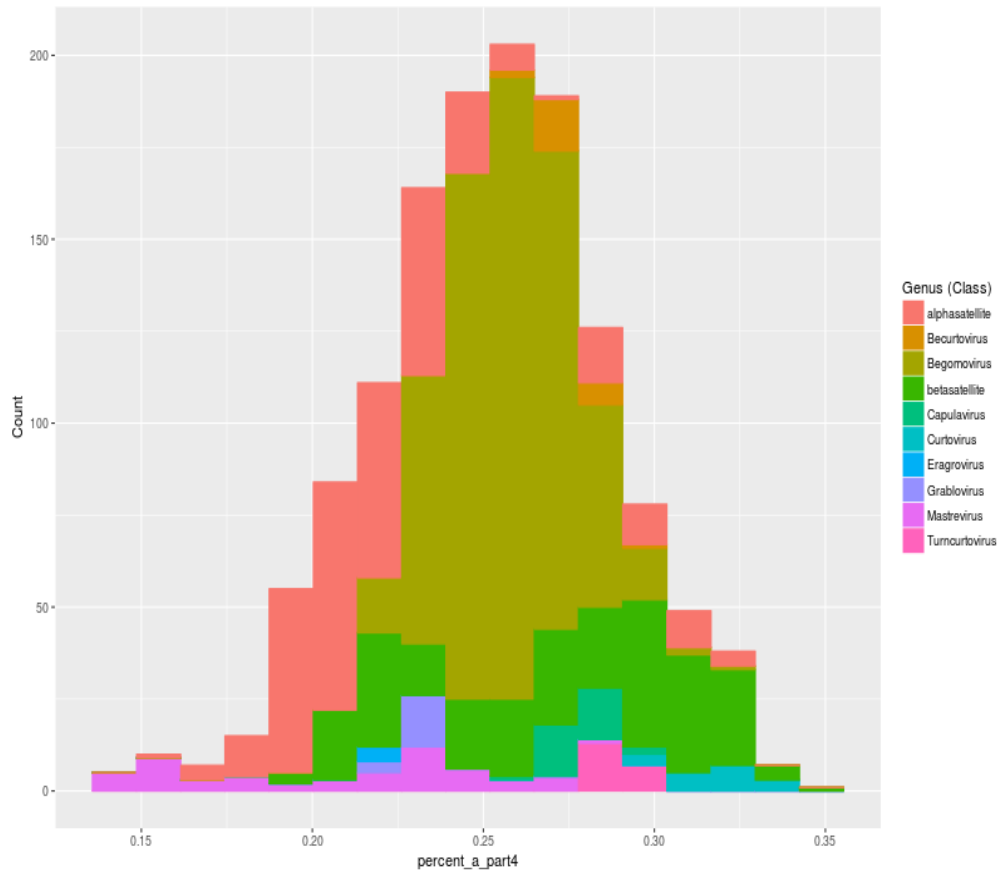

Density

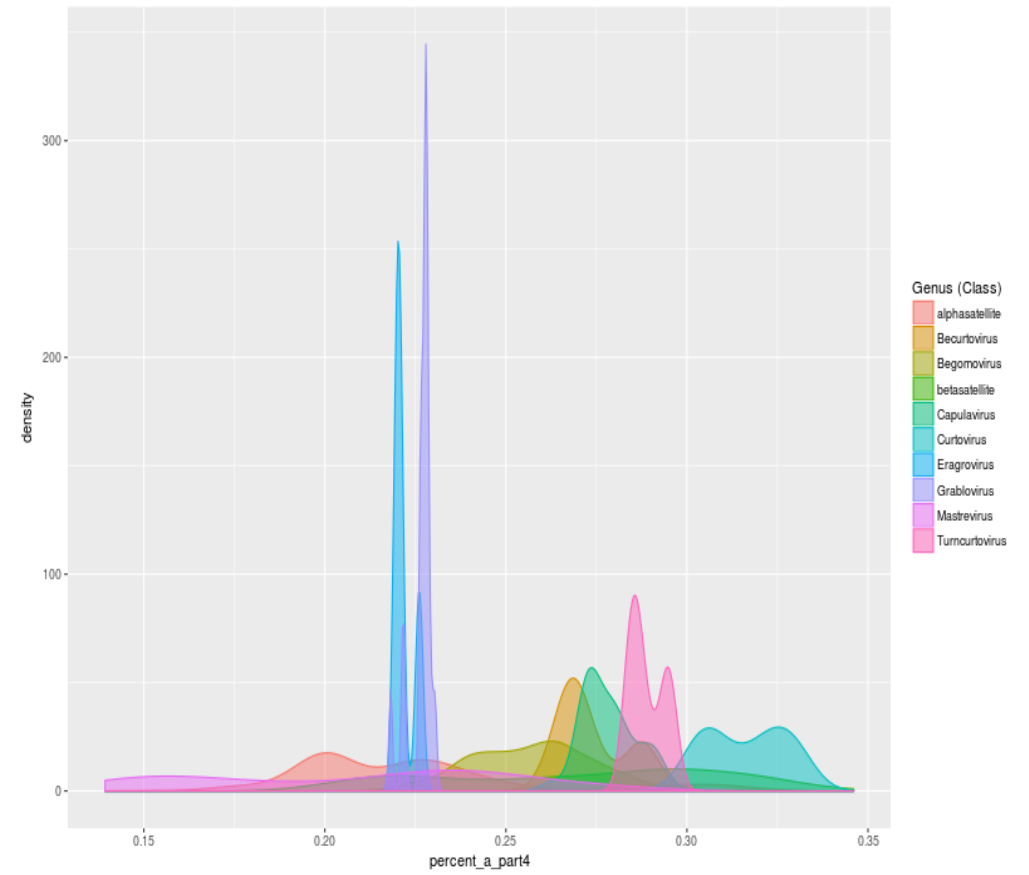

Boxplots

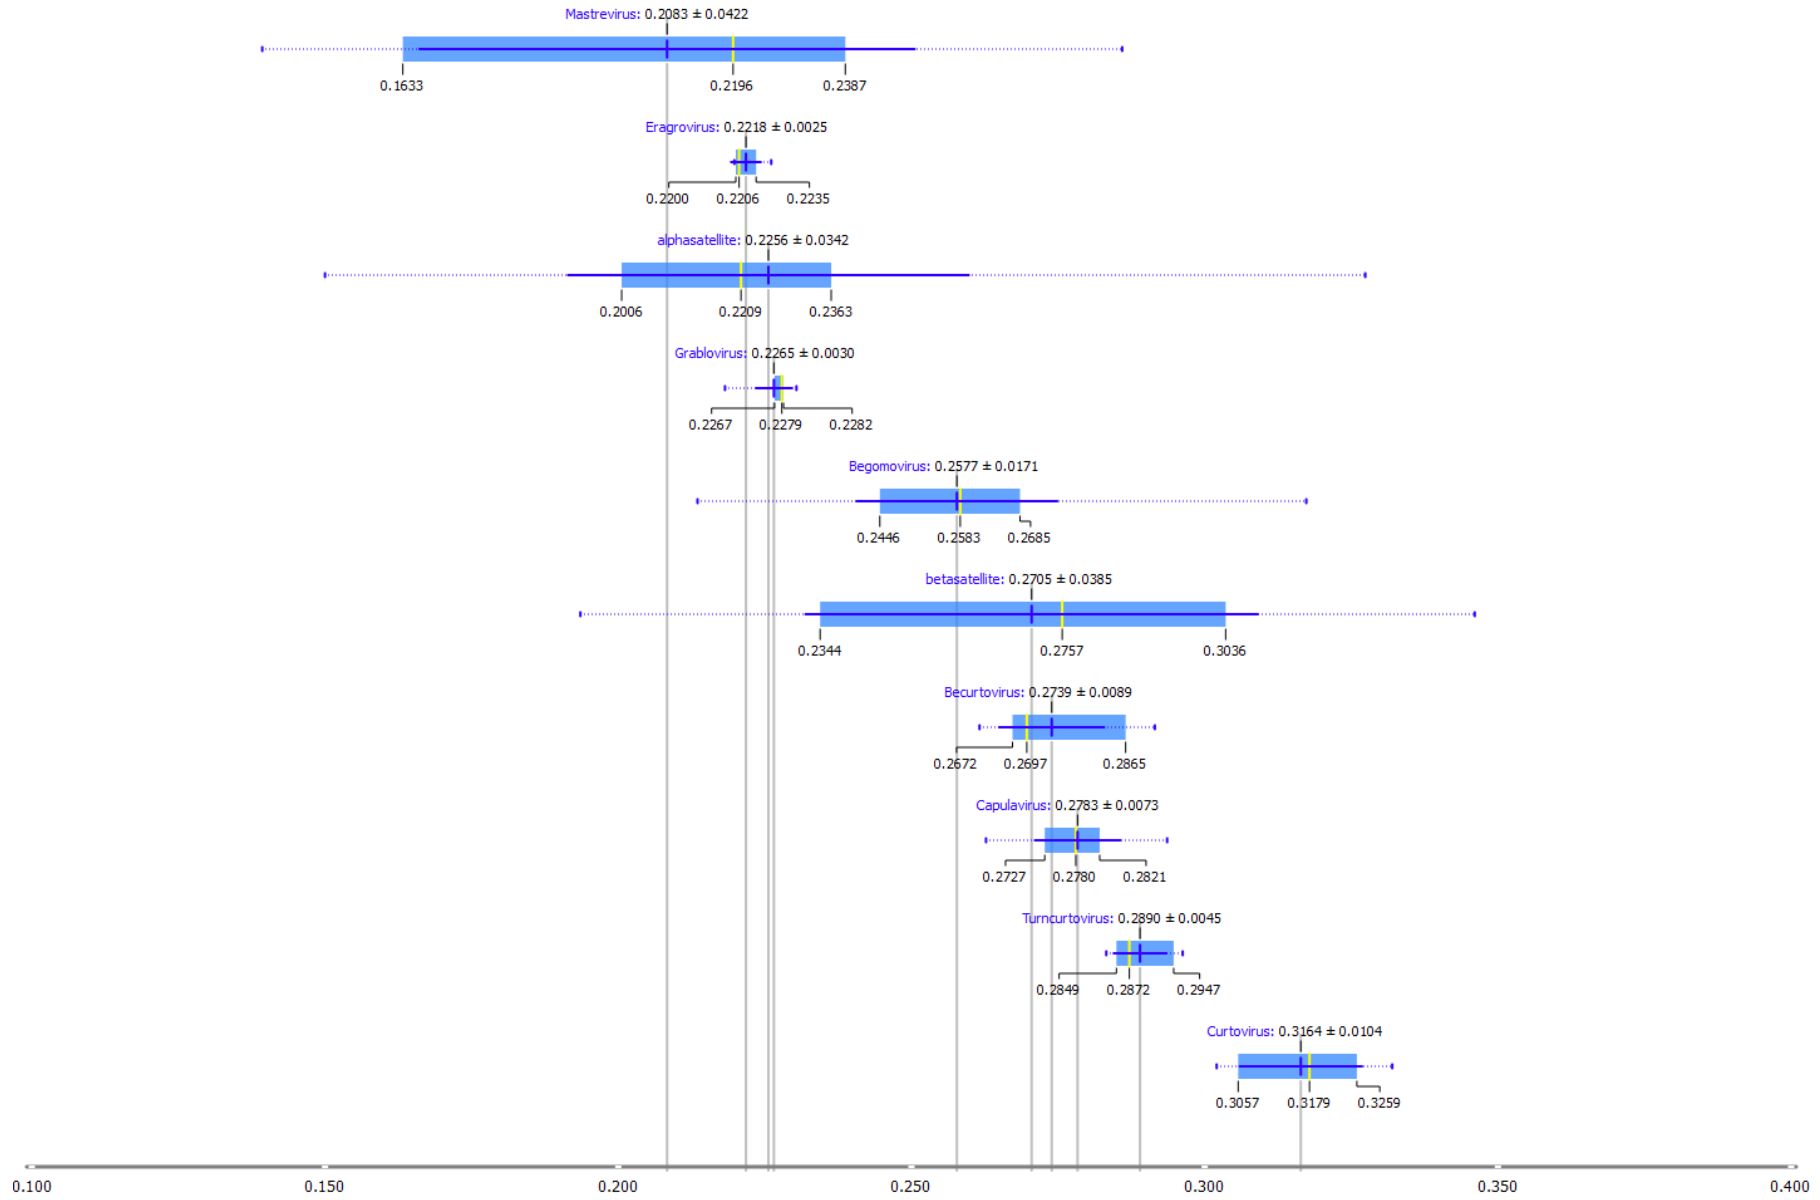

# Proportion of Thymine in the genome

Histogram

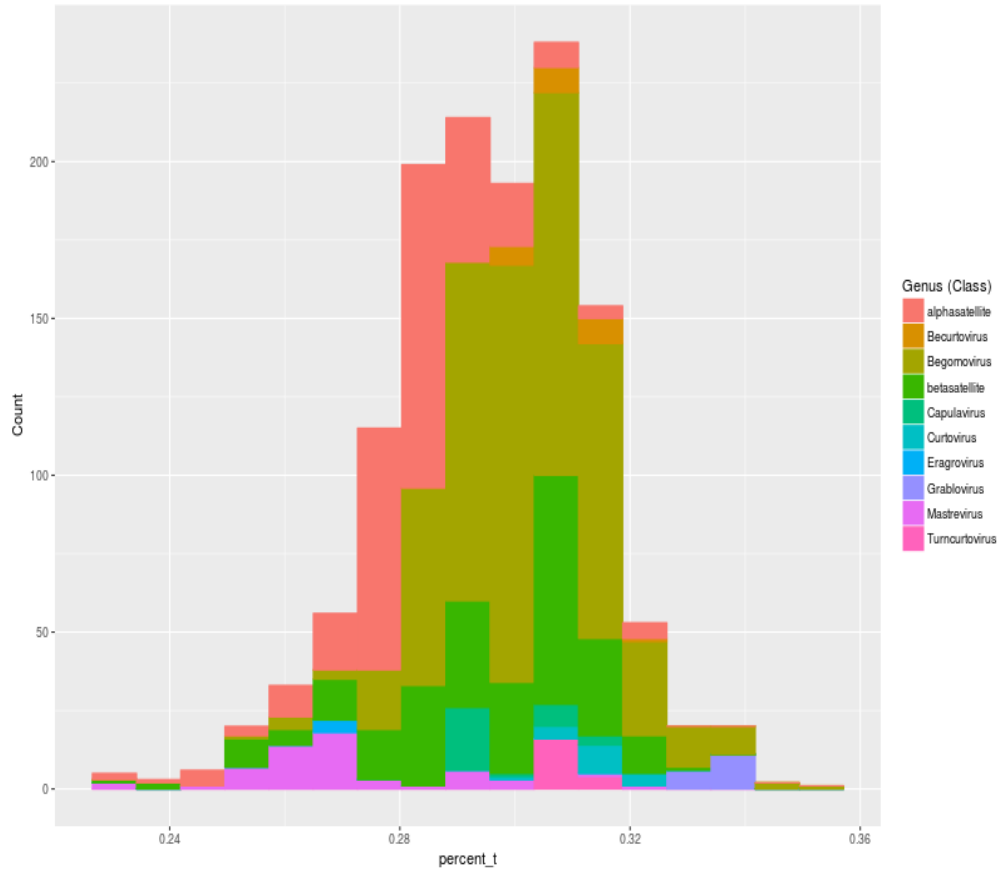

Density

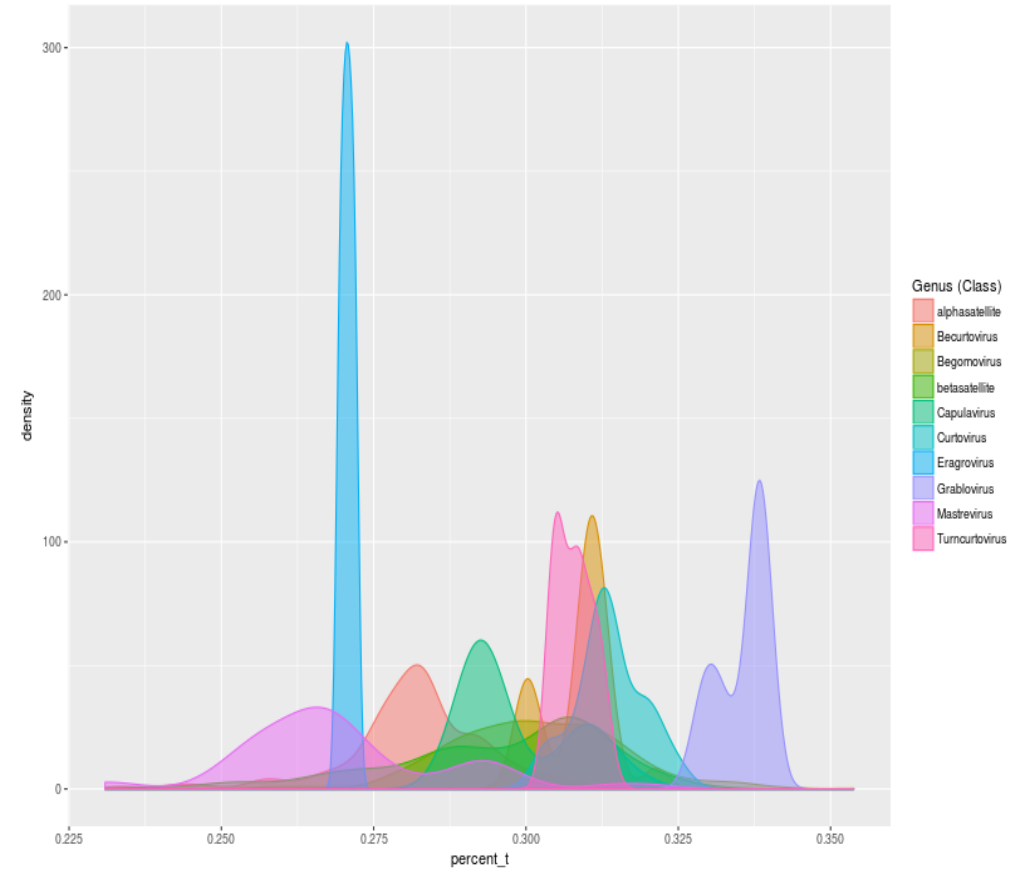

Boxplots

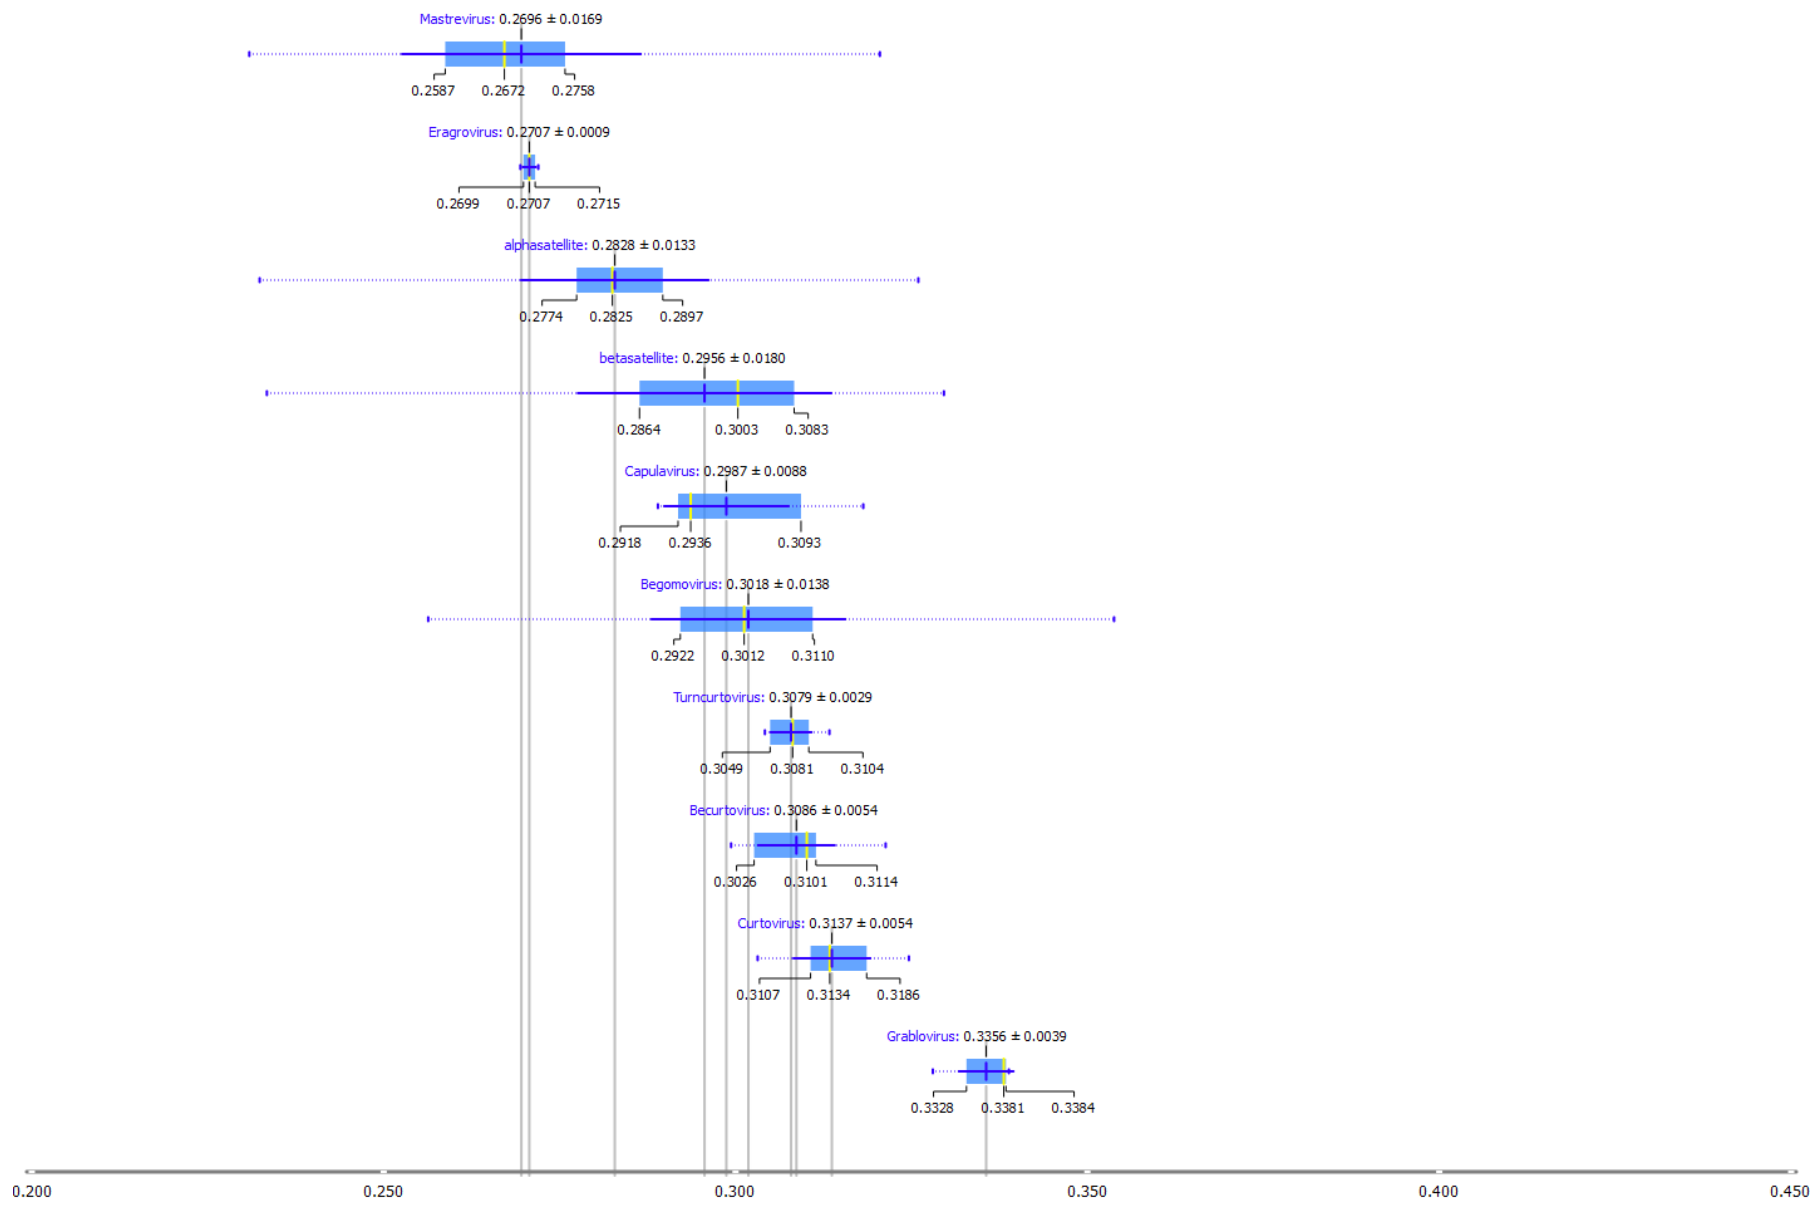

# Proportion of Thymine in region 1

Histogram

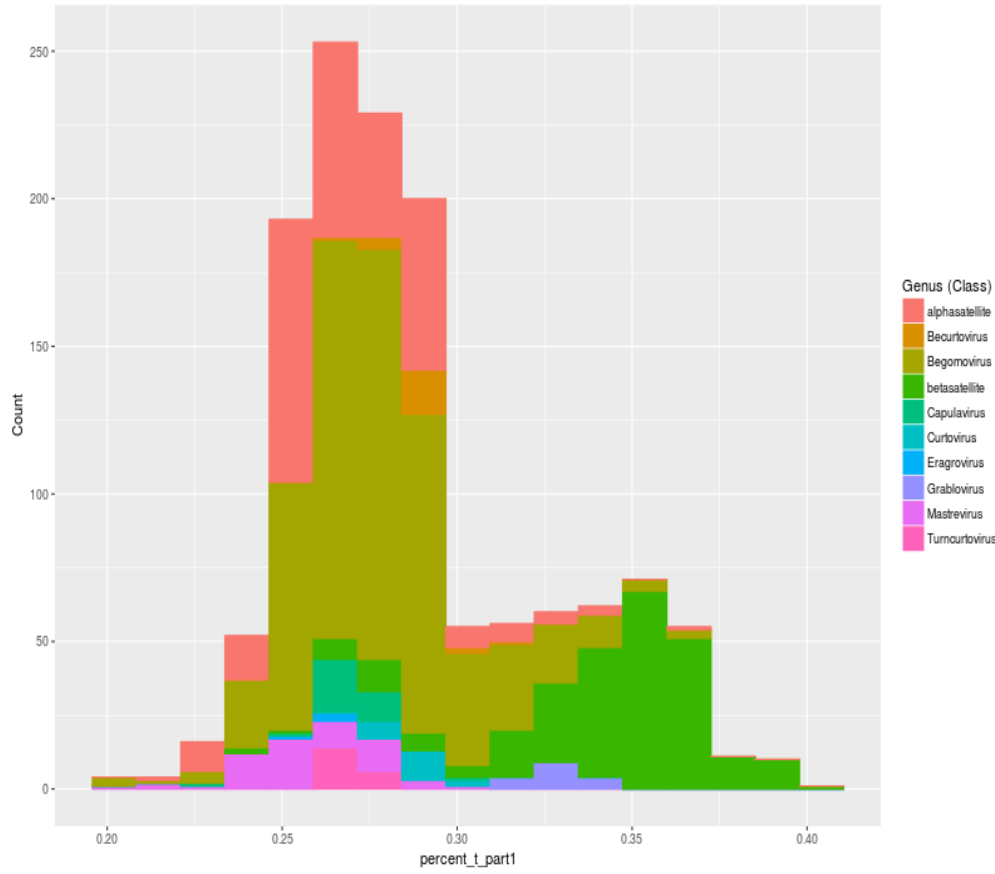

Density

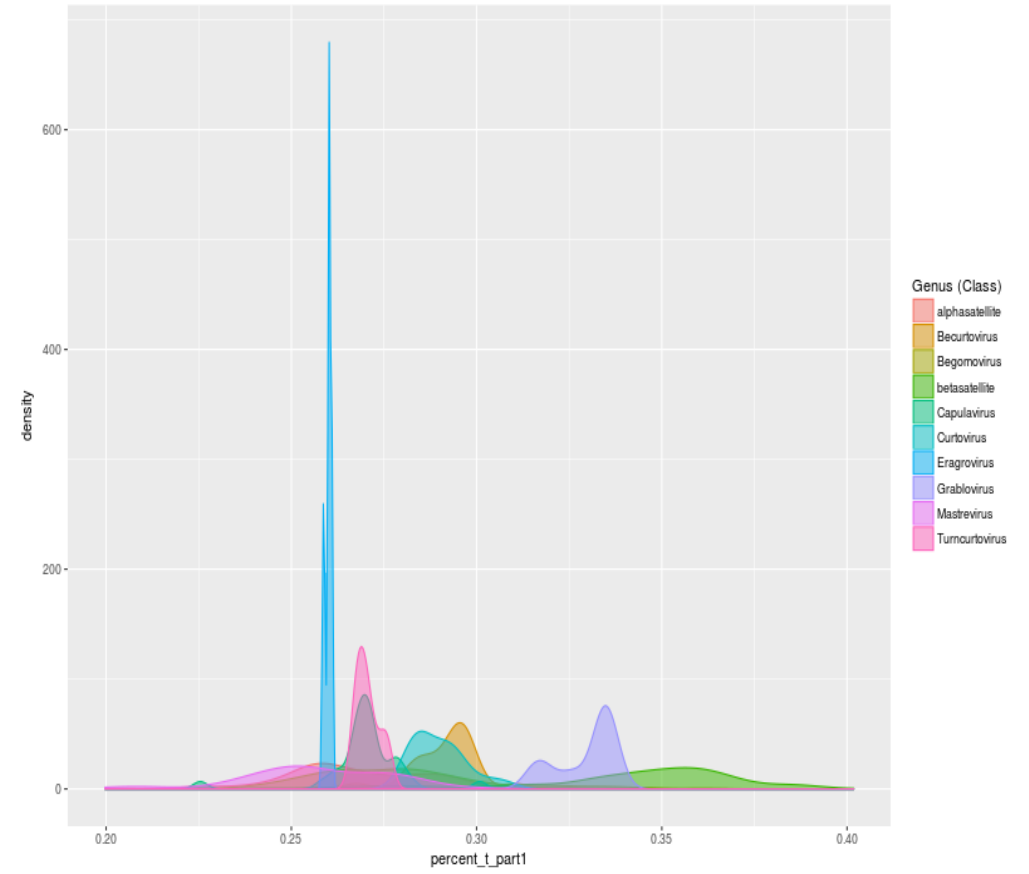

Boxplots

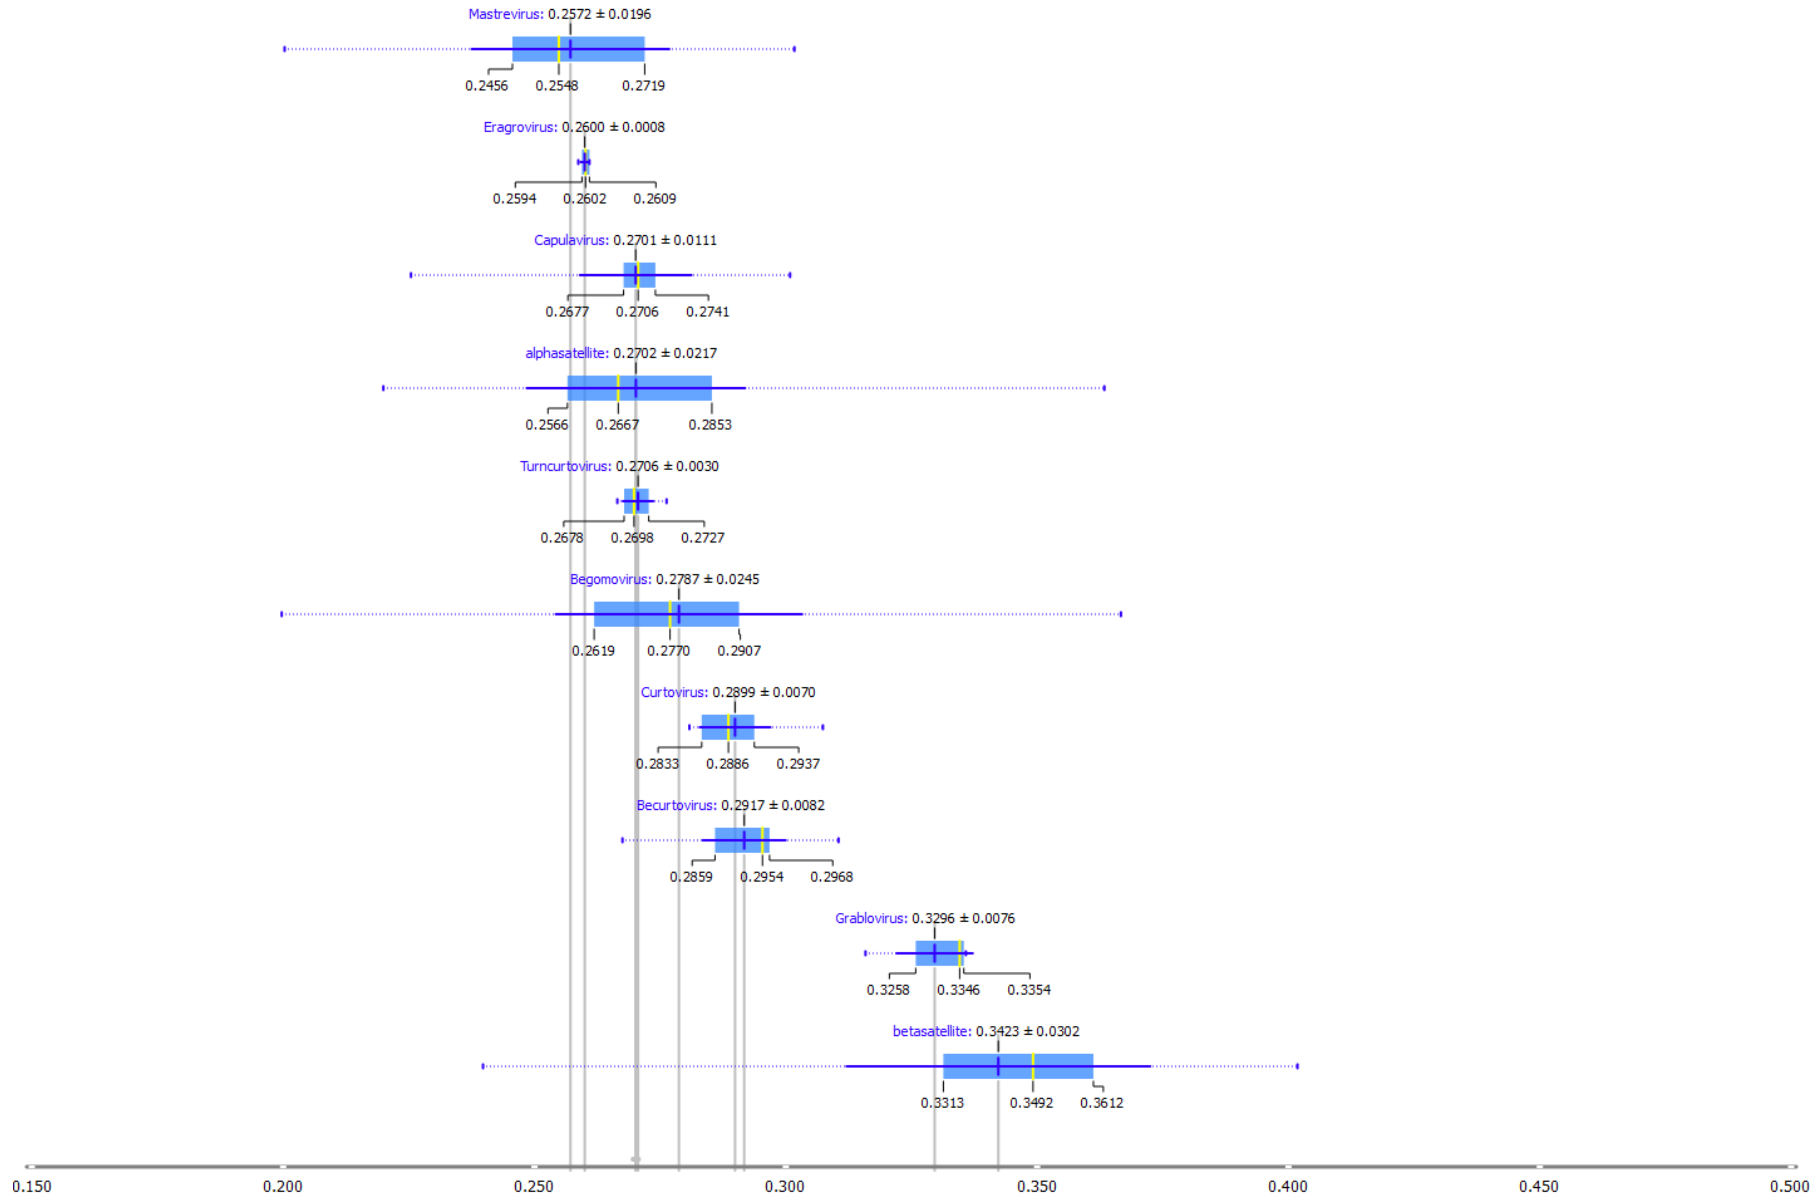

## Proportion of Thymine in region 2

Histogram

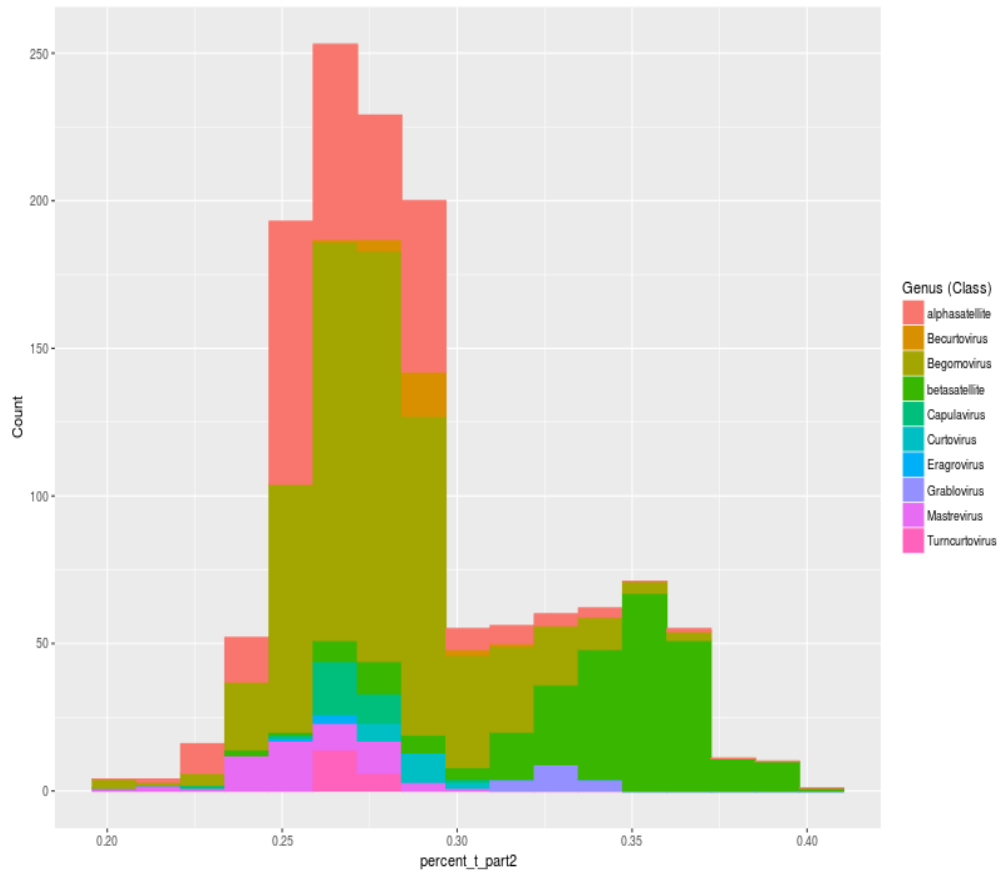

Density

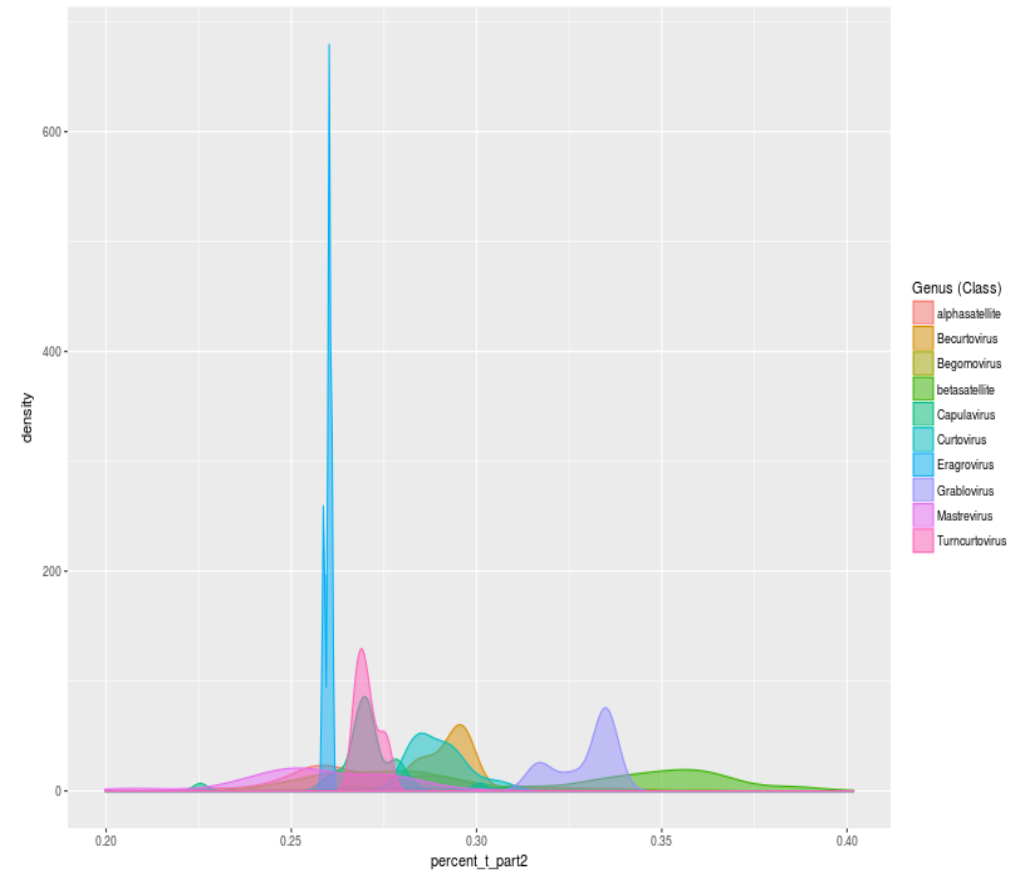

Boxplots

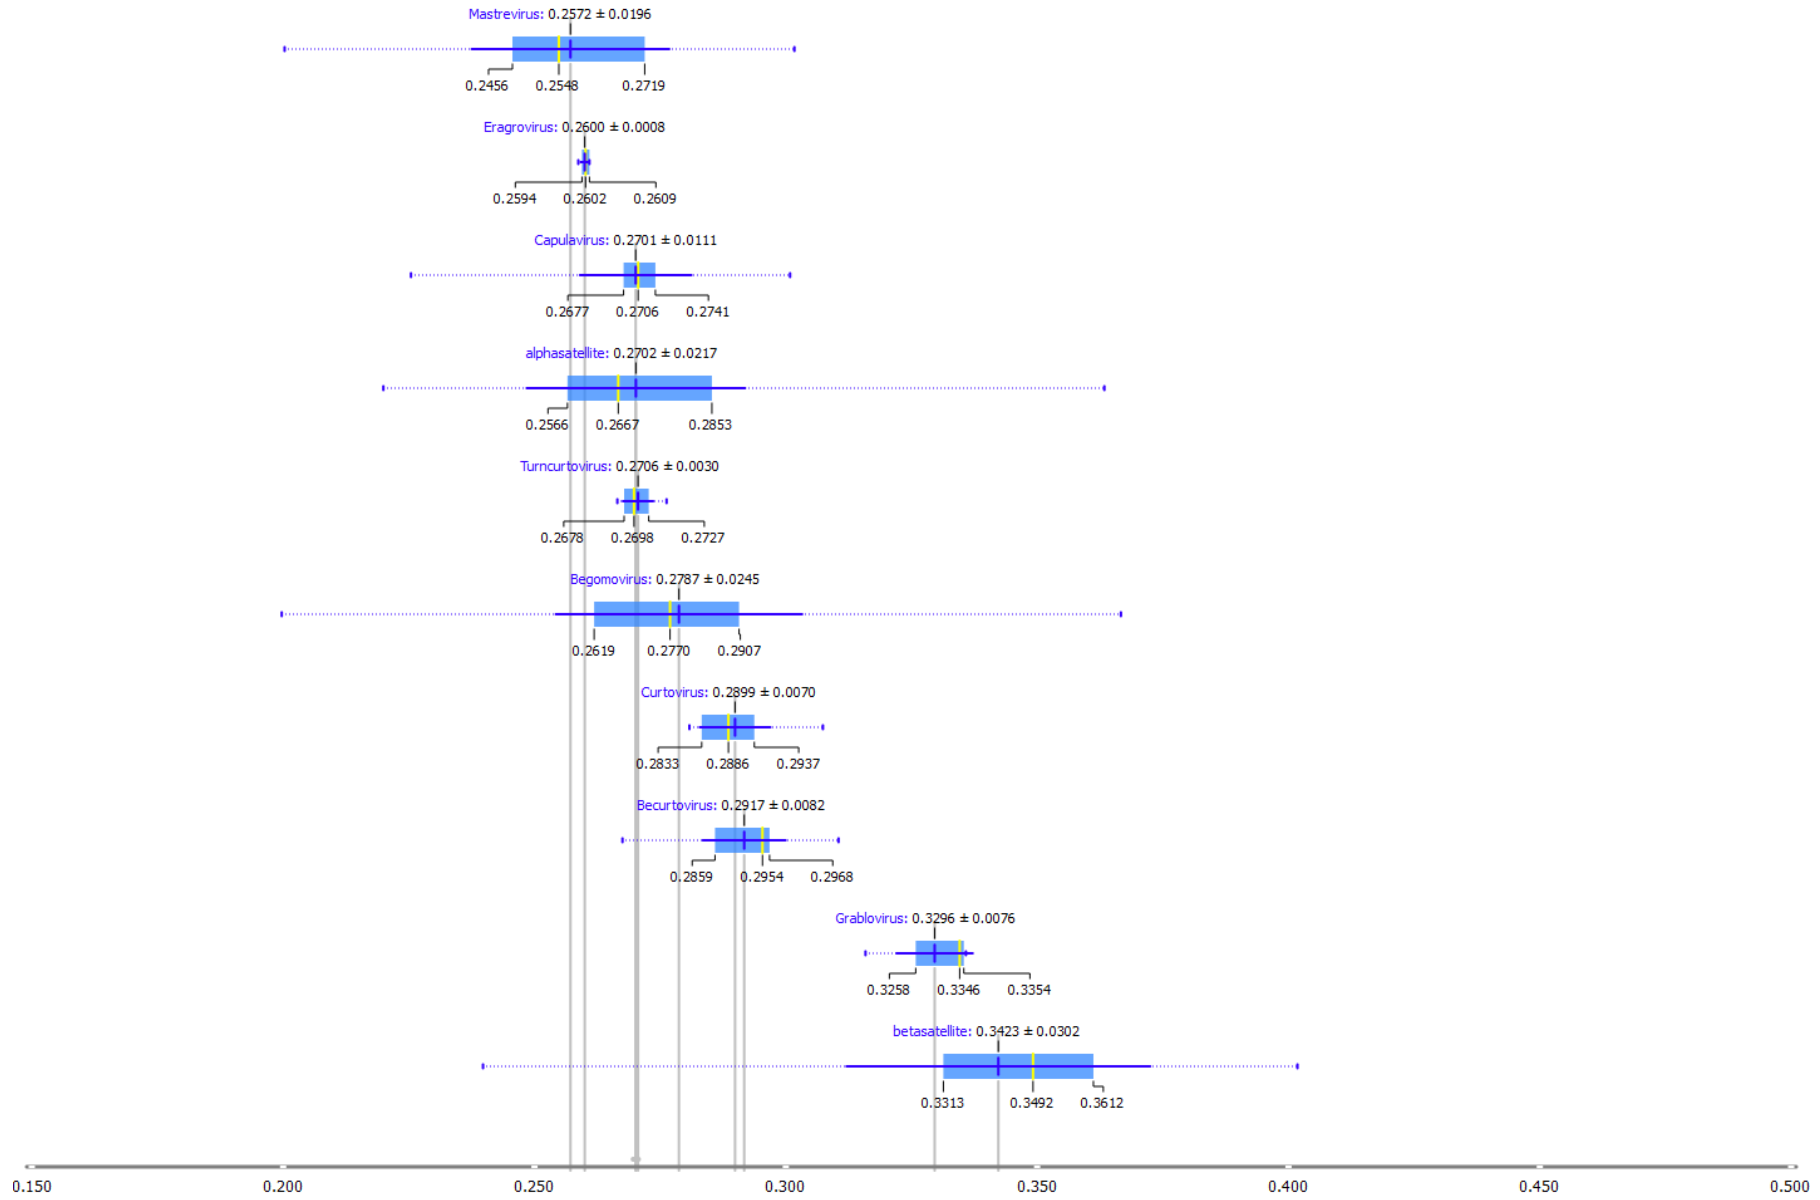



## Proportion of Thymine in region 3

Histogram

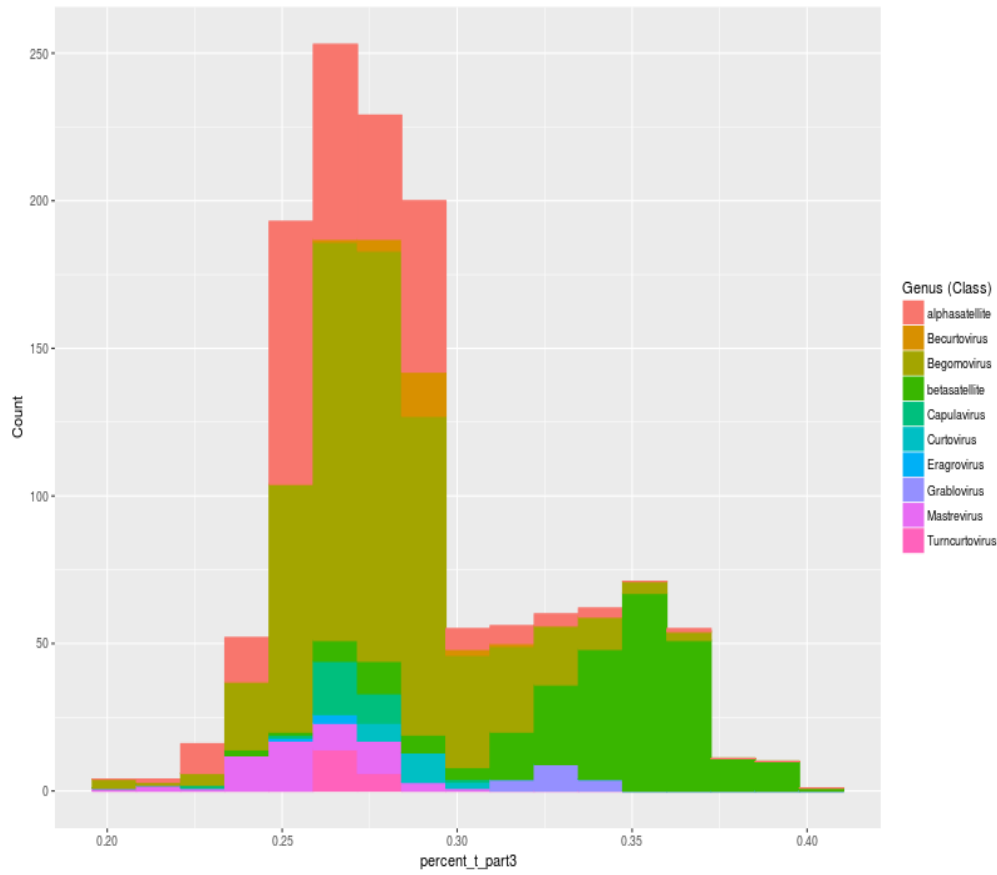

Density

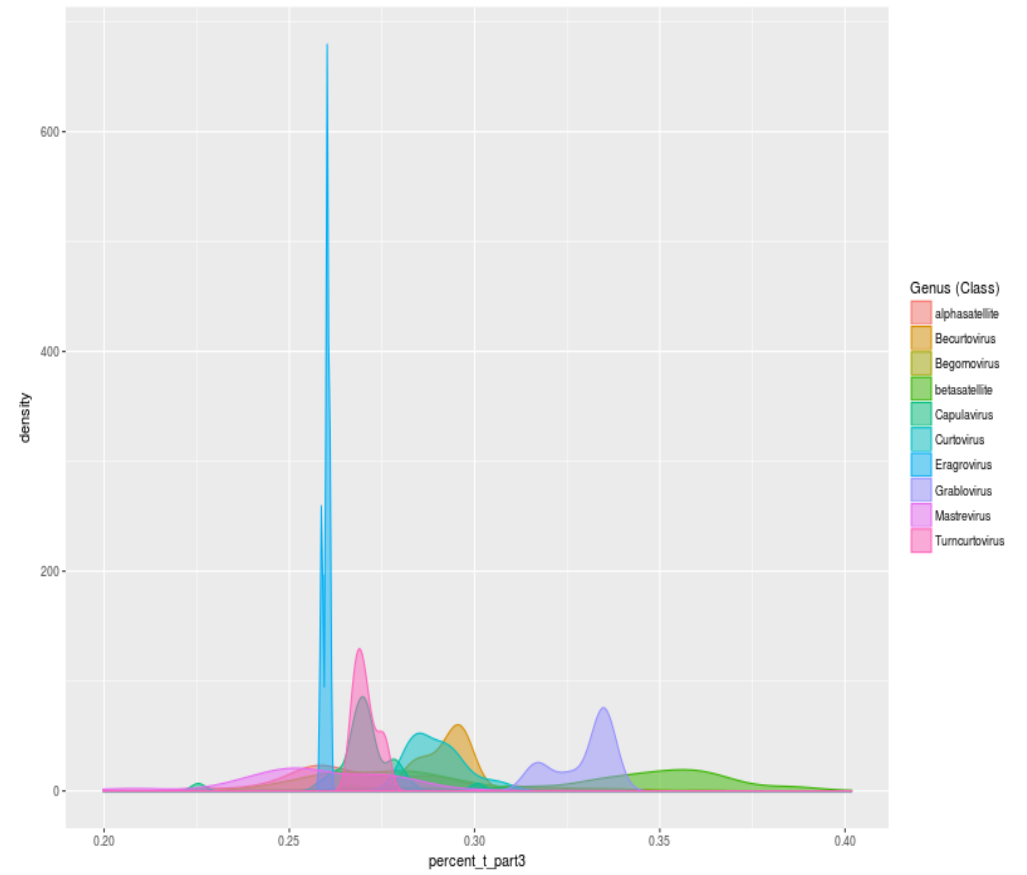

Boxplots



## Proportion of Thymine in region 4

Histogram

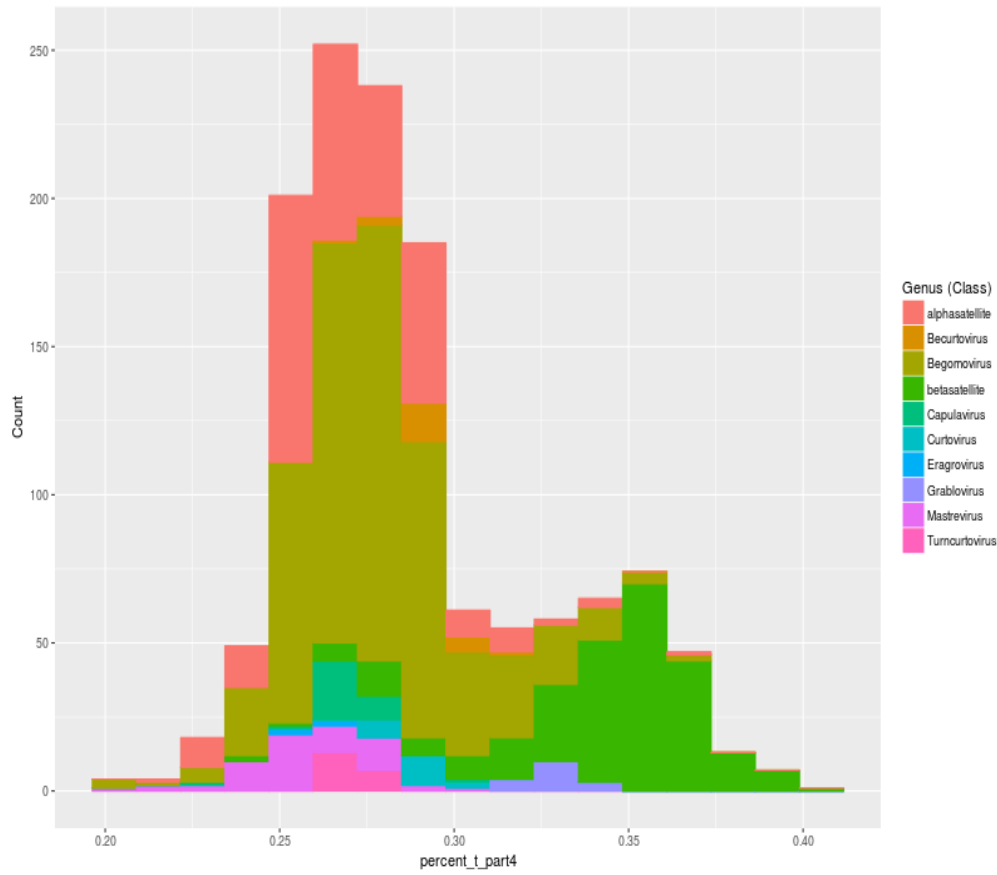

Density

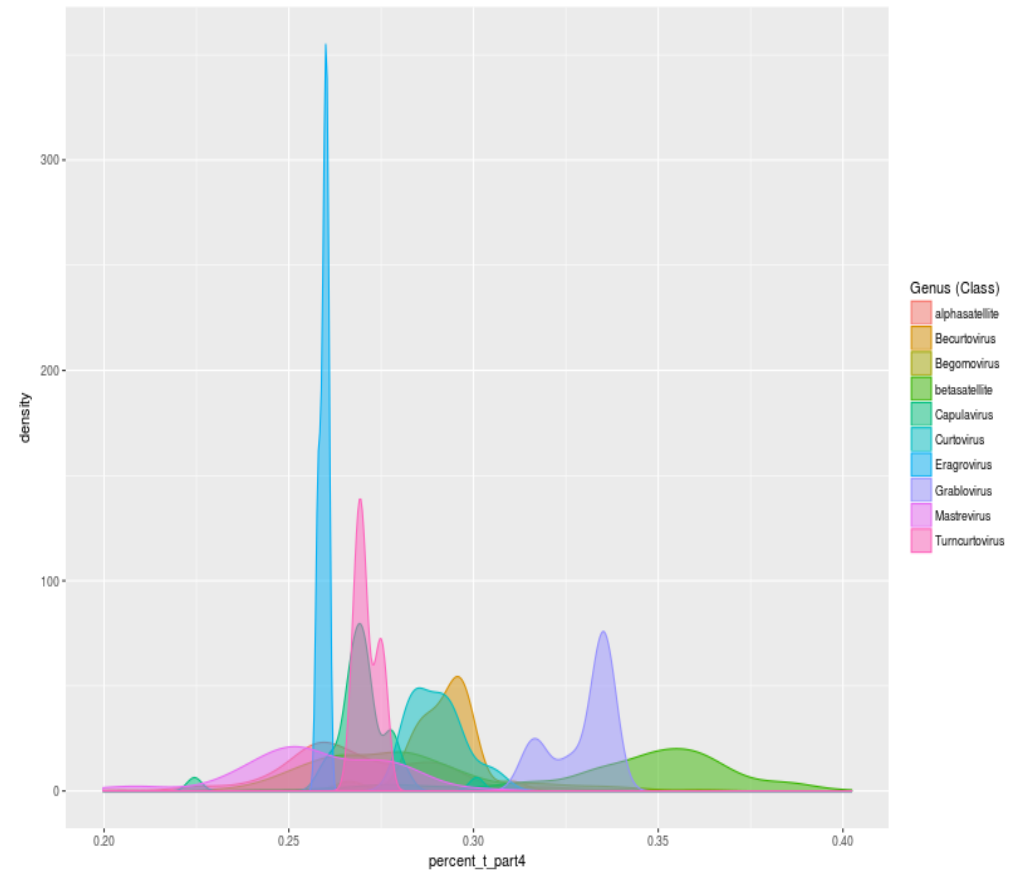

Boxplots

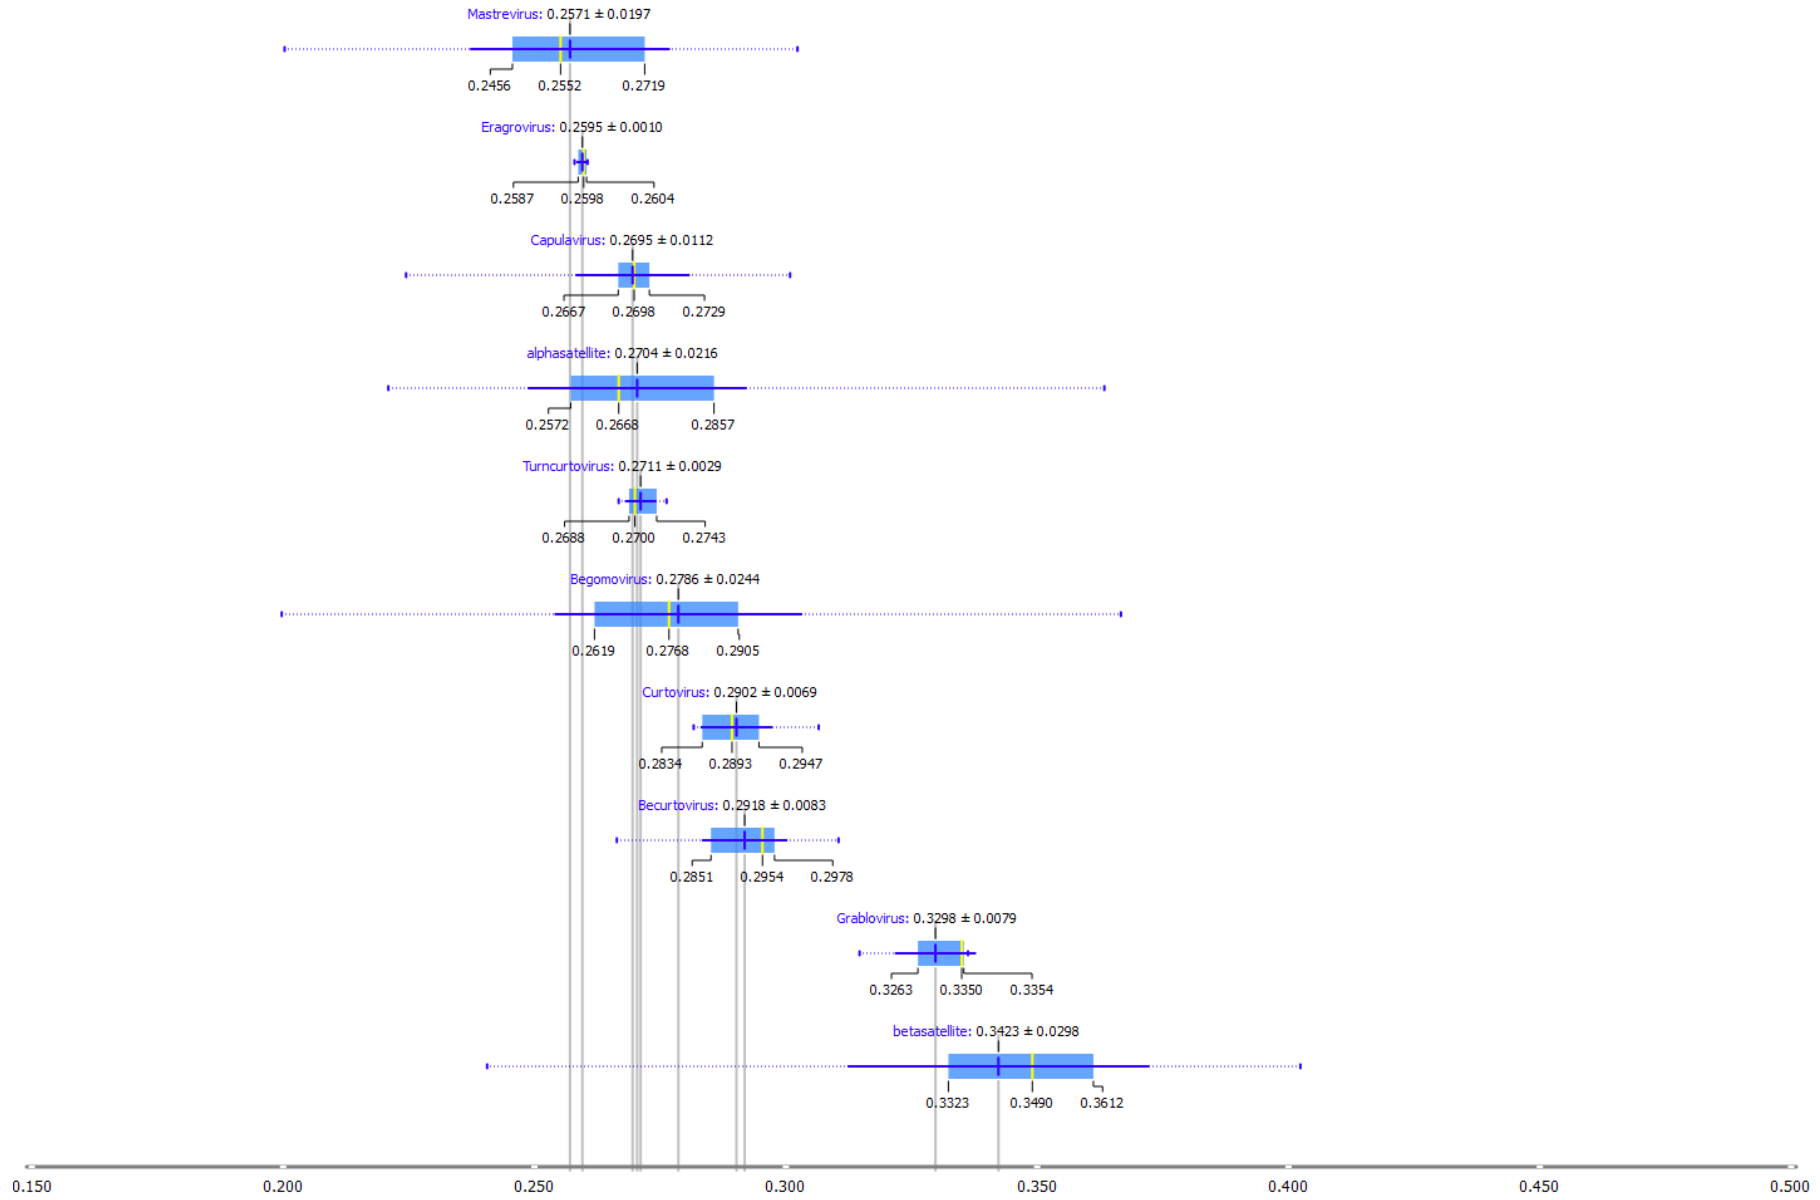

# Proportion of Cytosine in the genome

Histogram

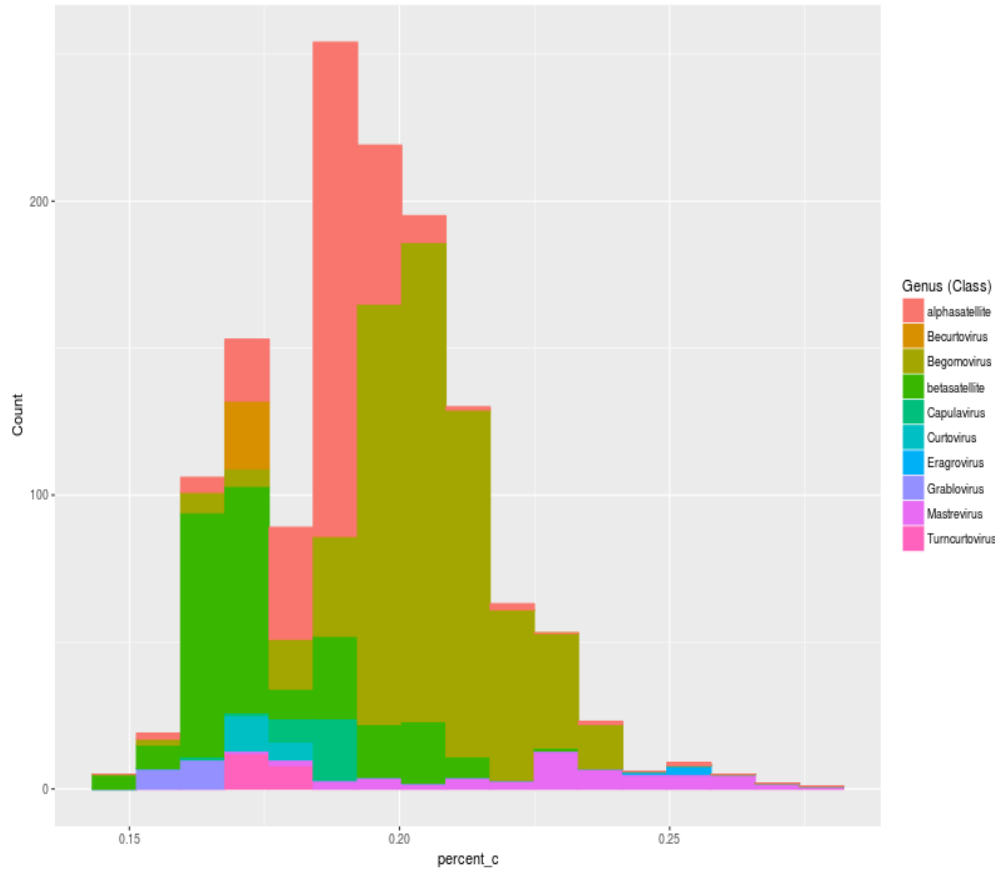

Density

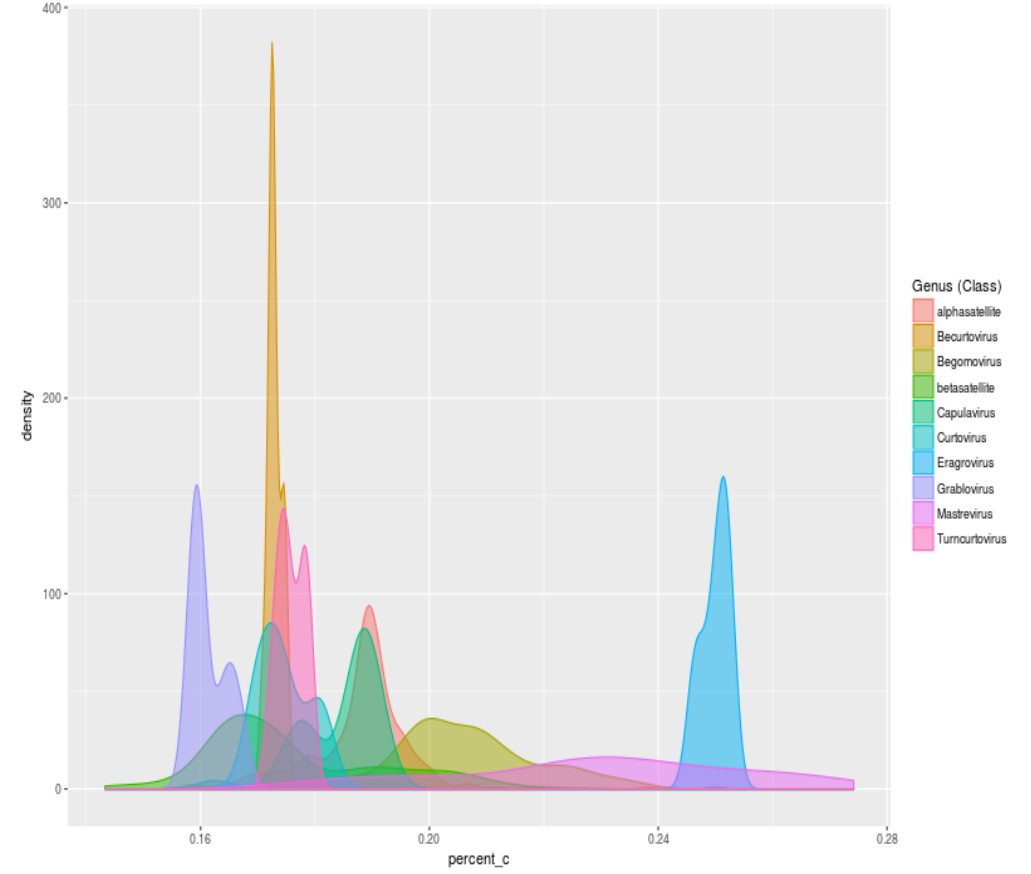

Boxplots

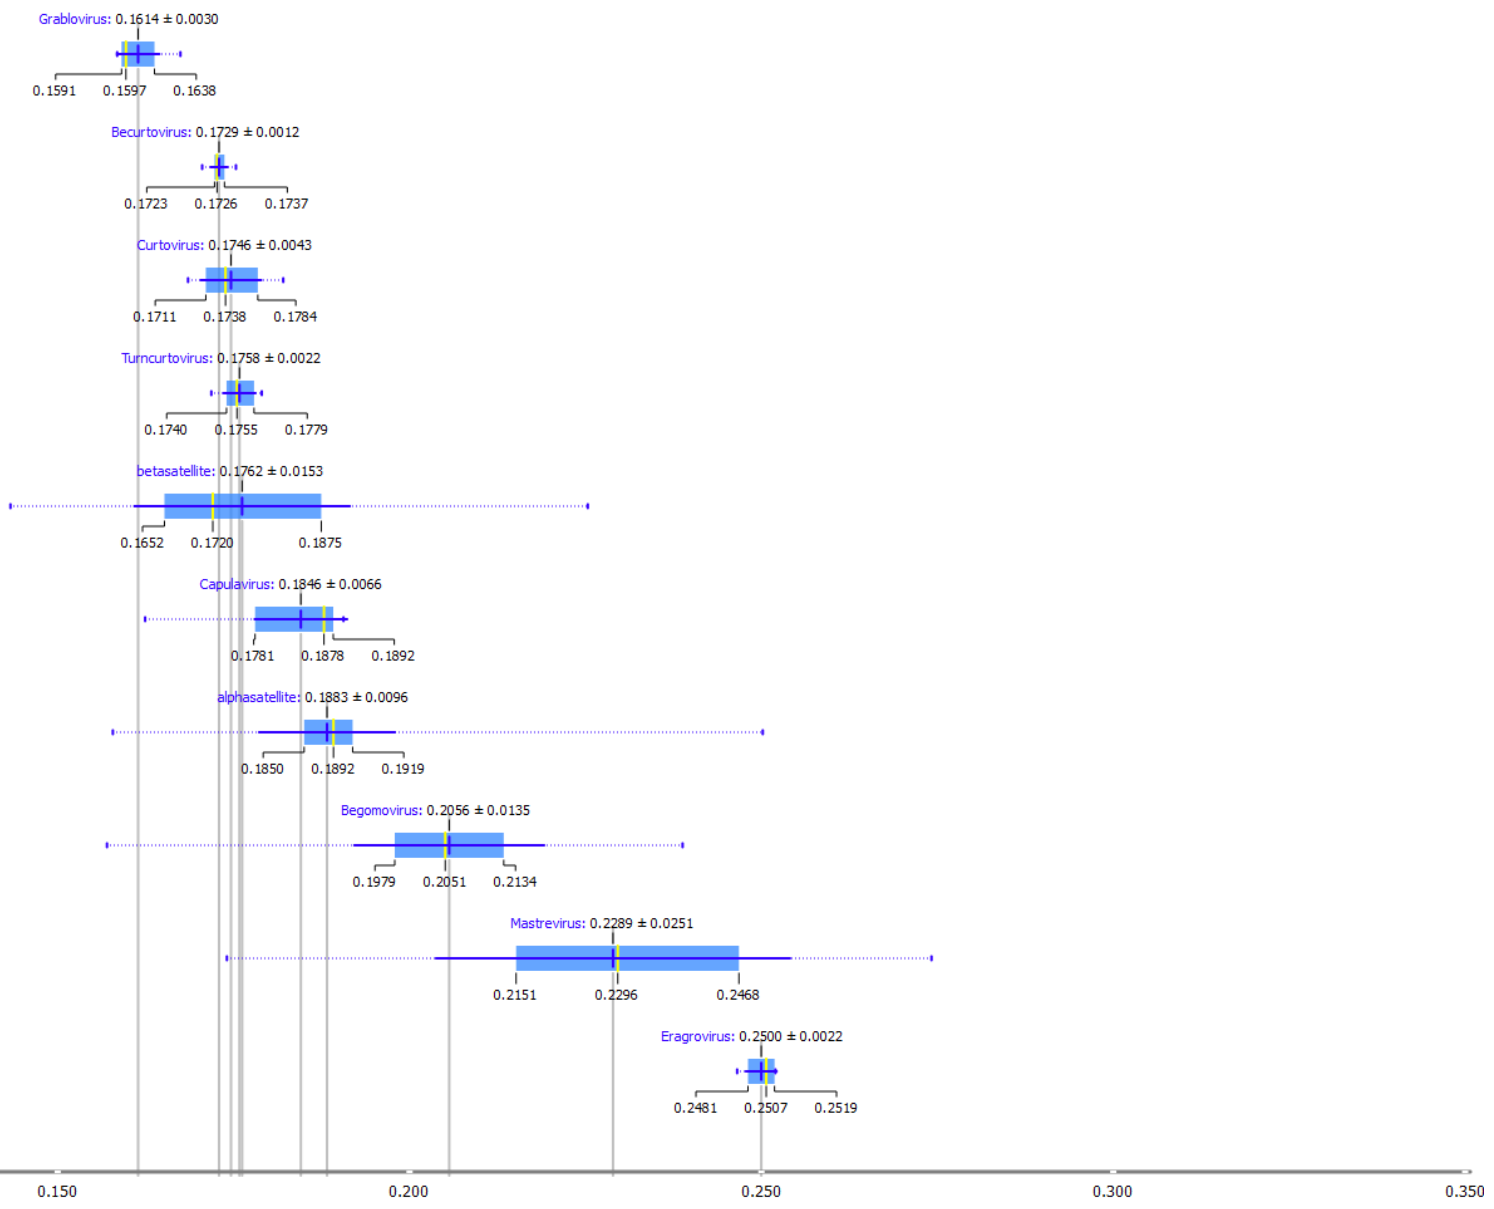

# Proportion of Cytosine in region 1

Histogram

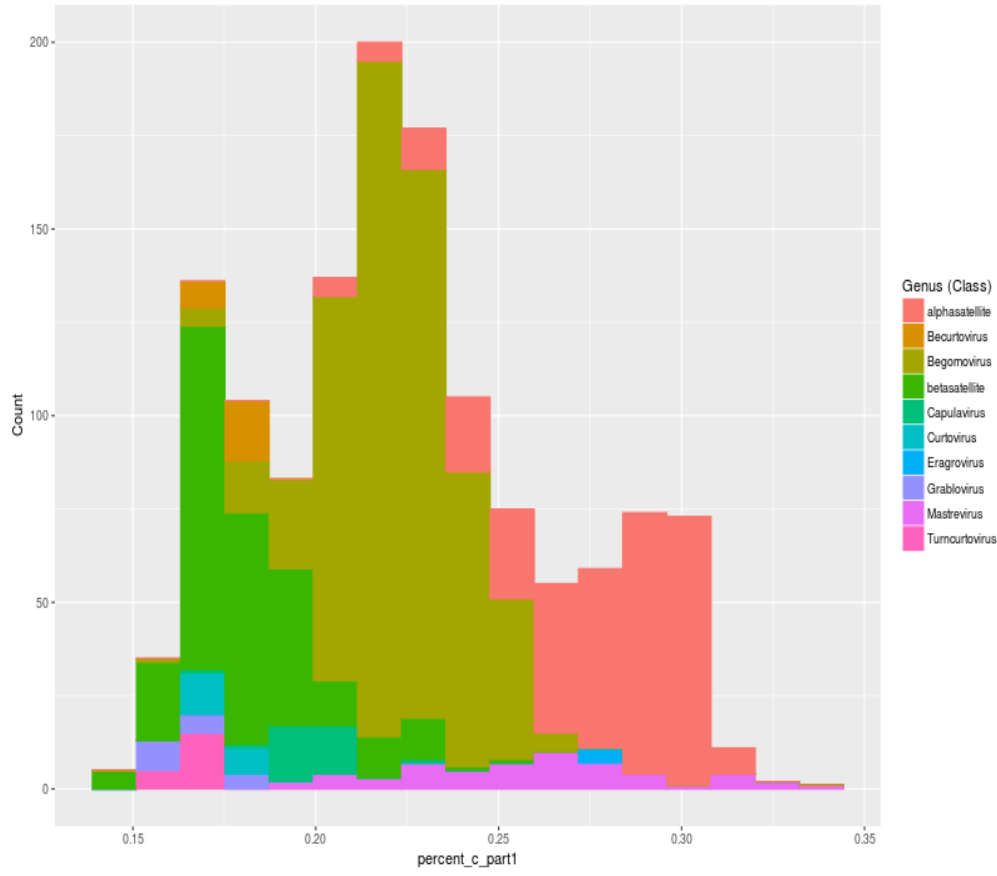

Density

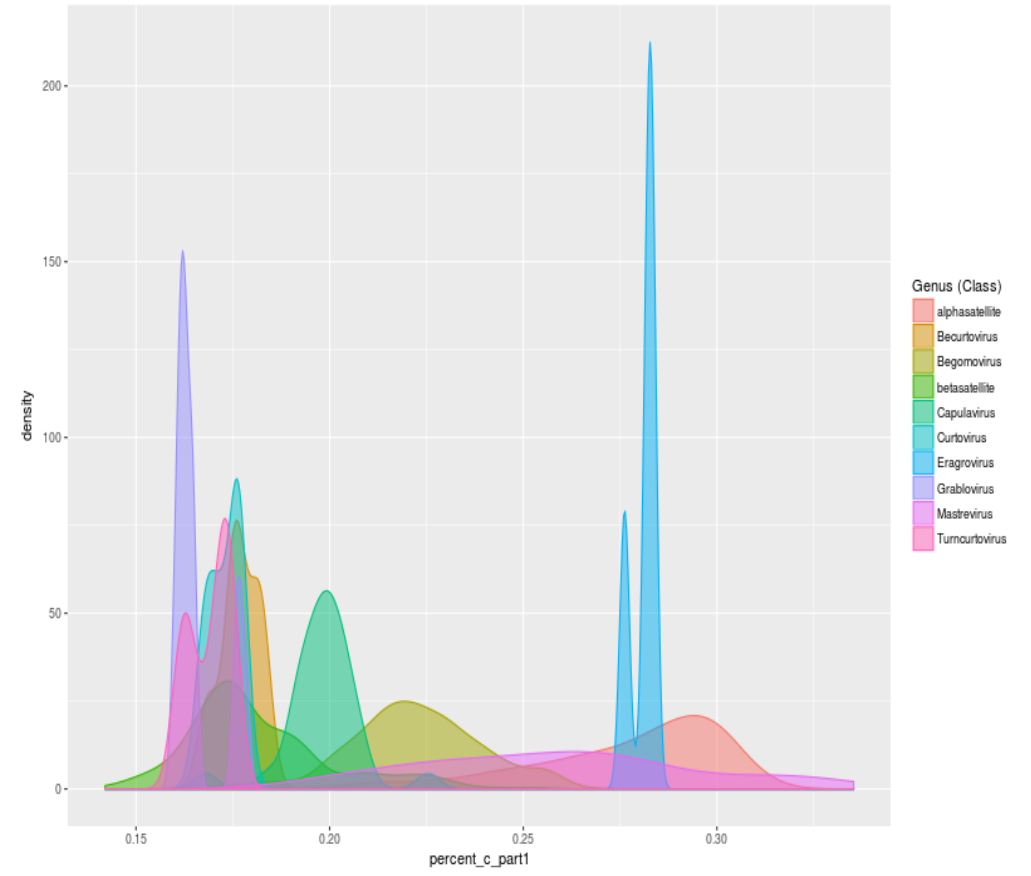

Boxplots

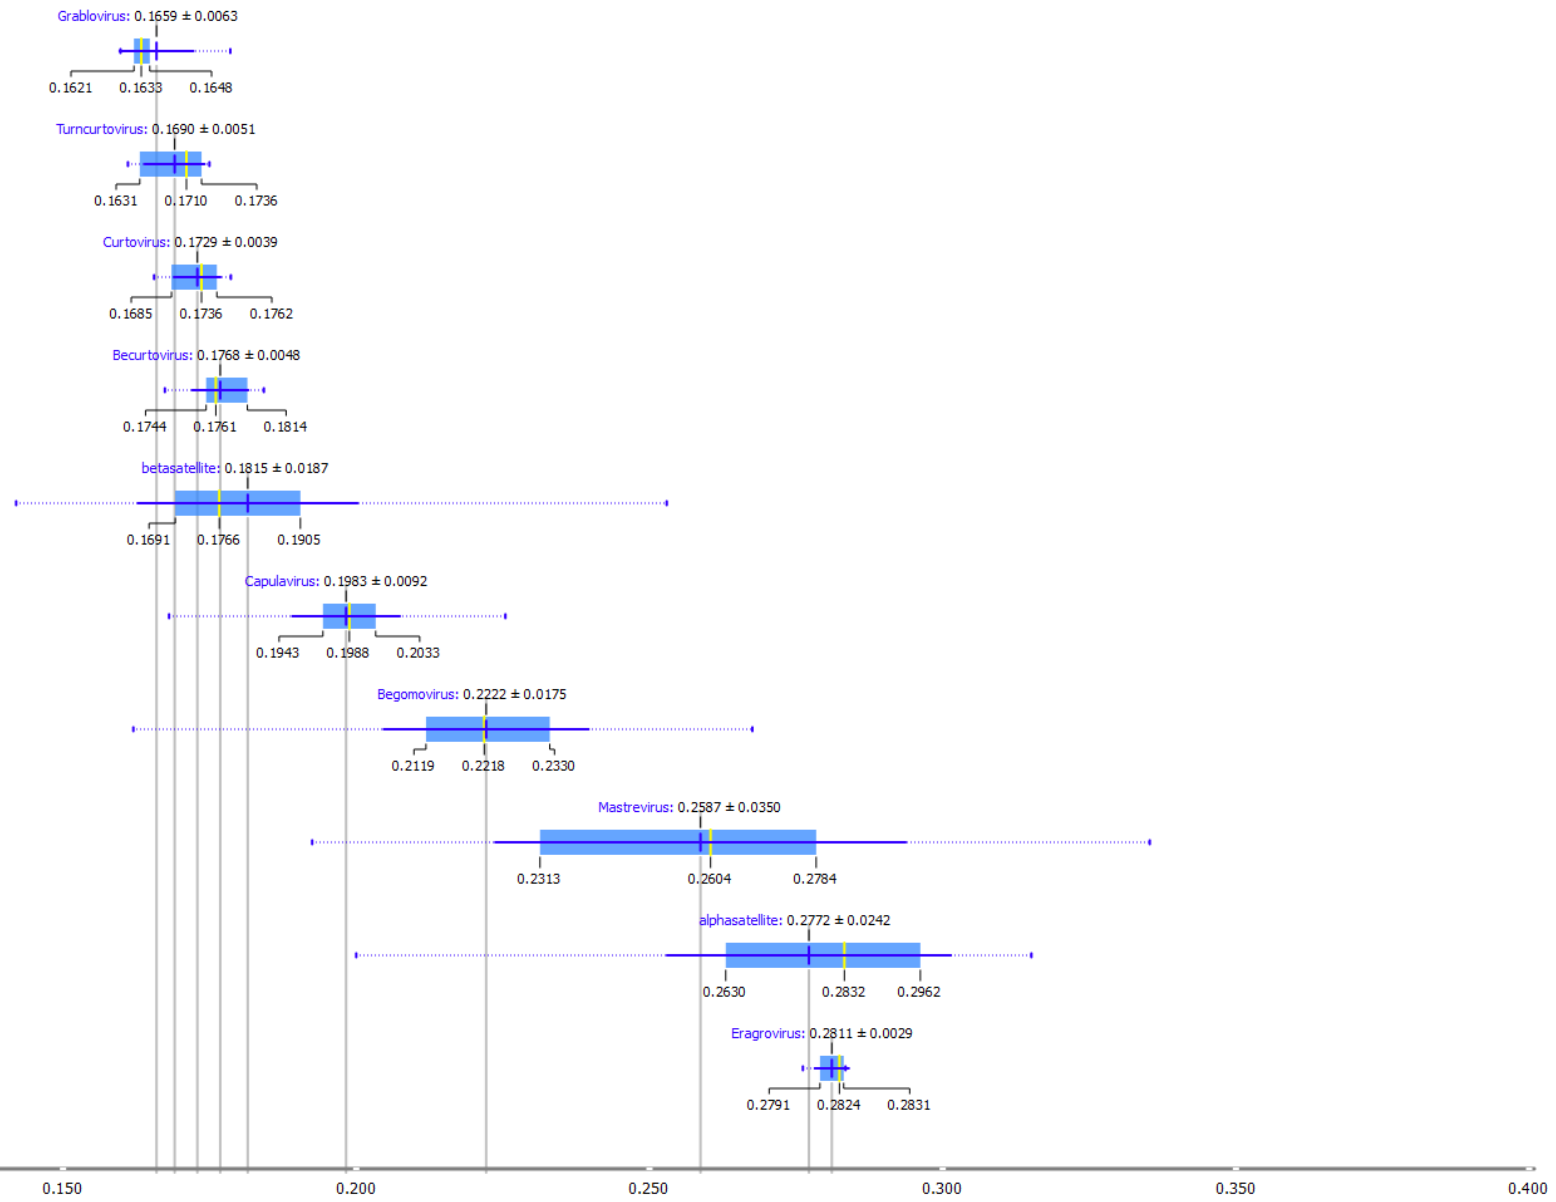



## Proportion of Cytosine in region 2

Histogram

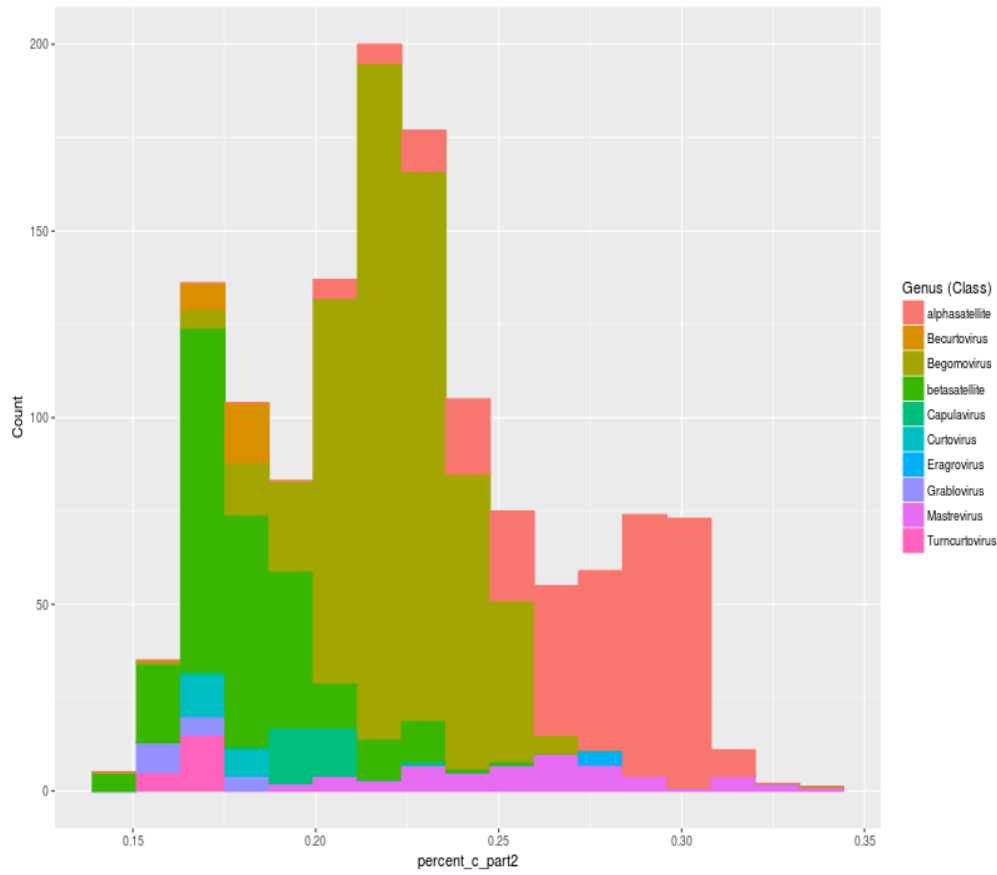

Density

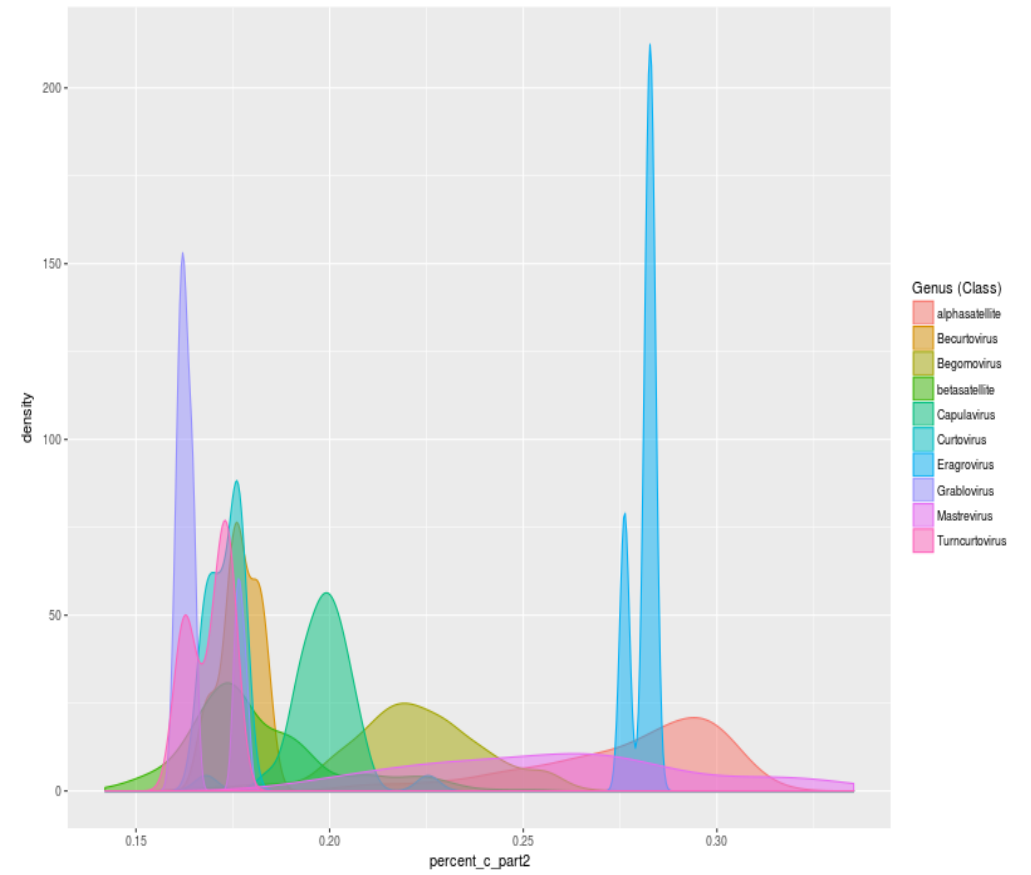

Boxplots

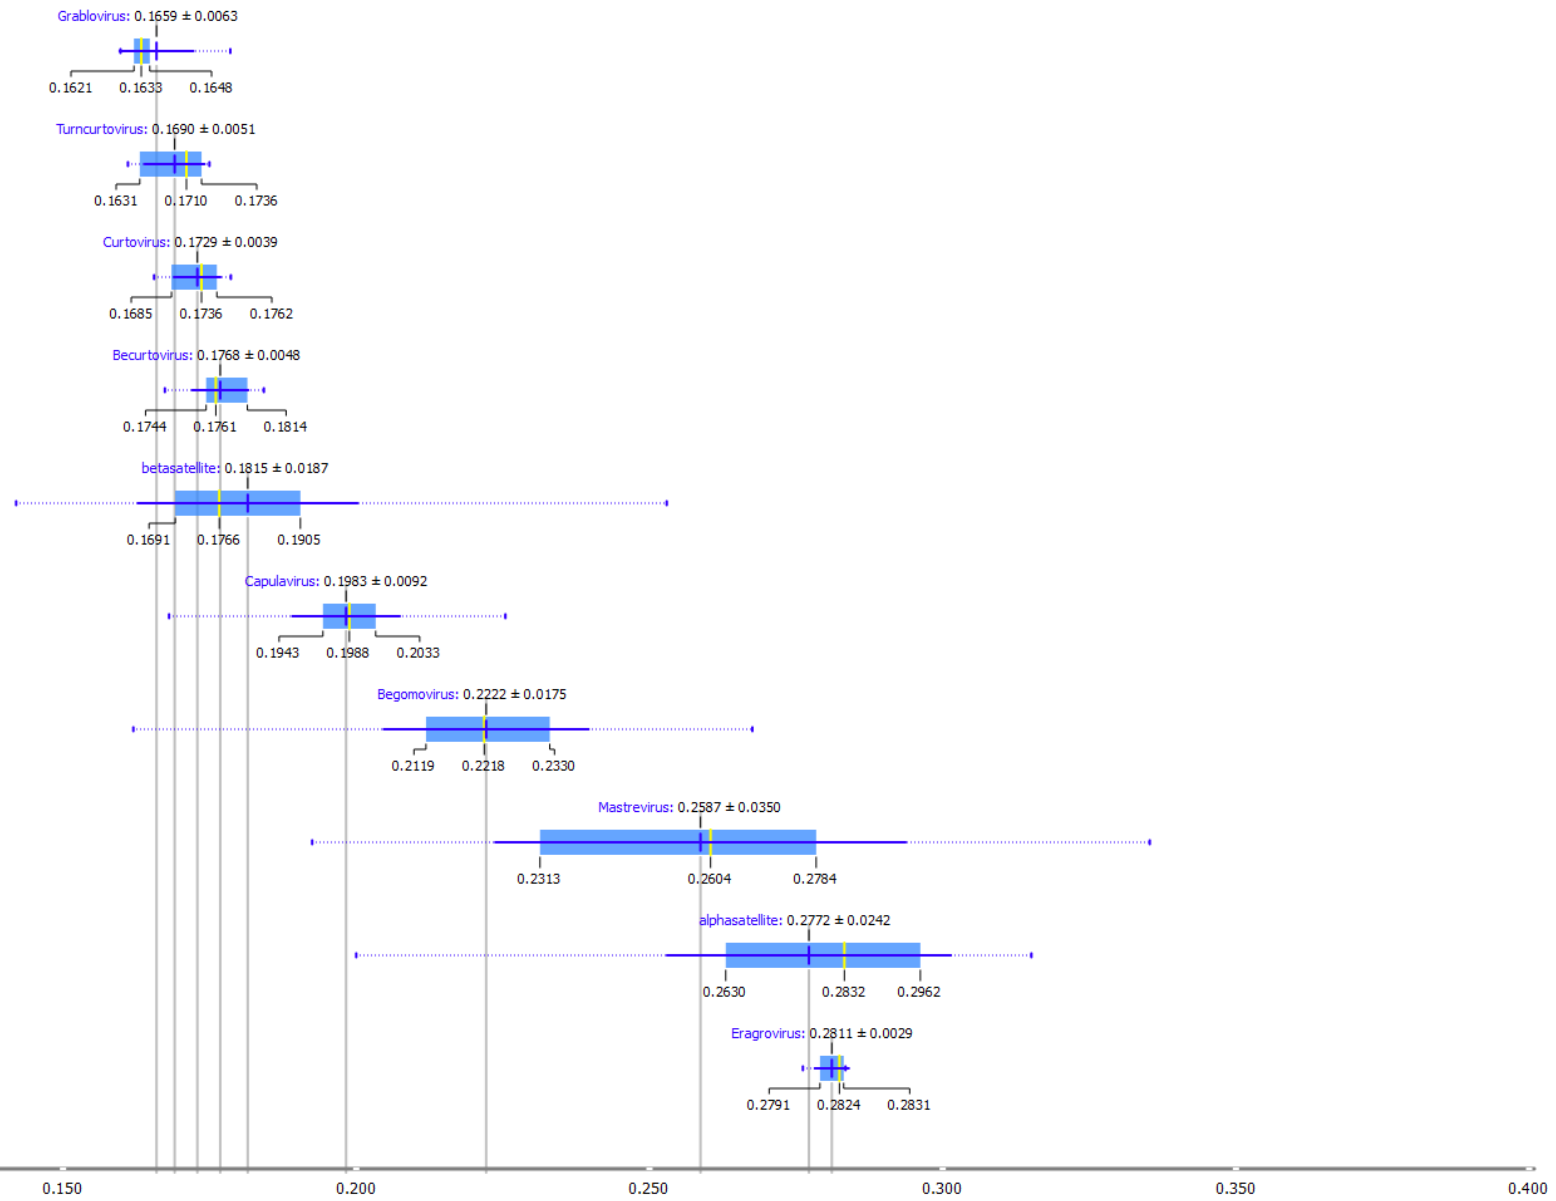

## Proportion of Cytosine in region 3

Histogram

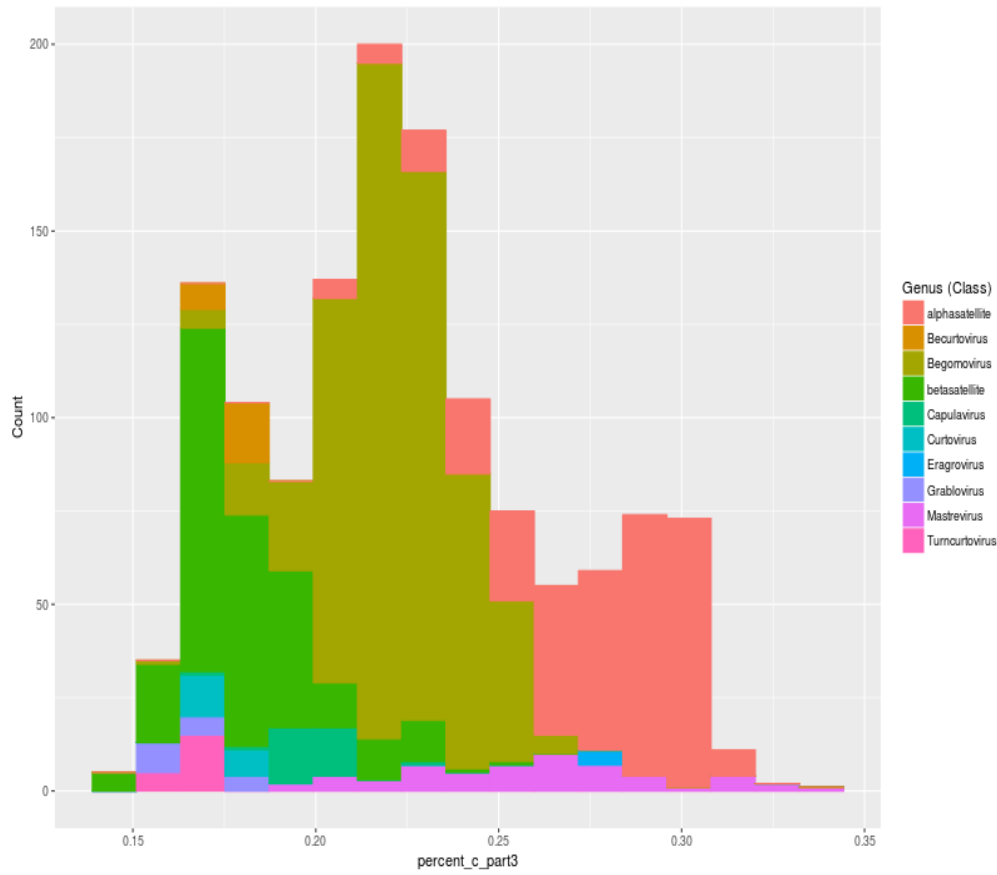

Density

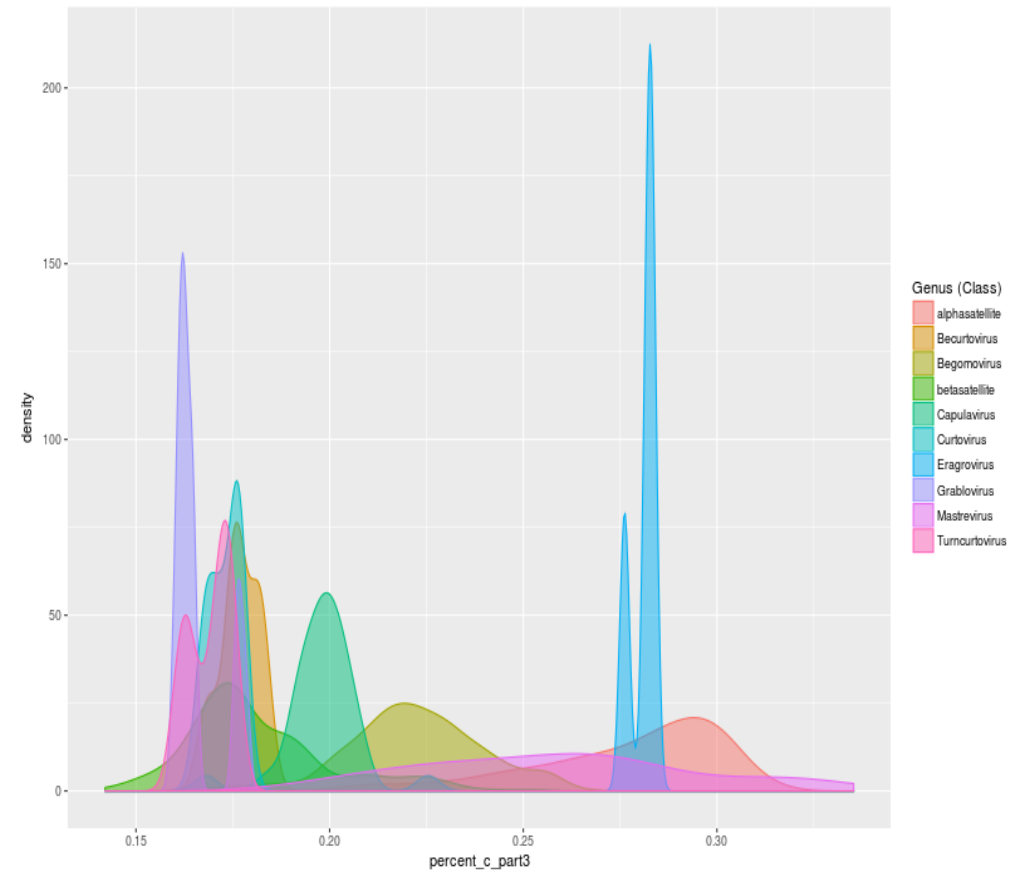

Boxplots



## Proportion of Cytosine in region 4

Histogram

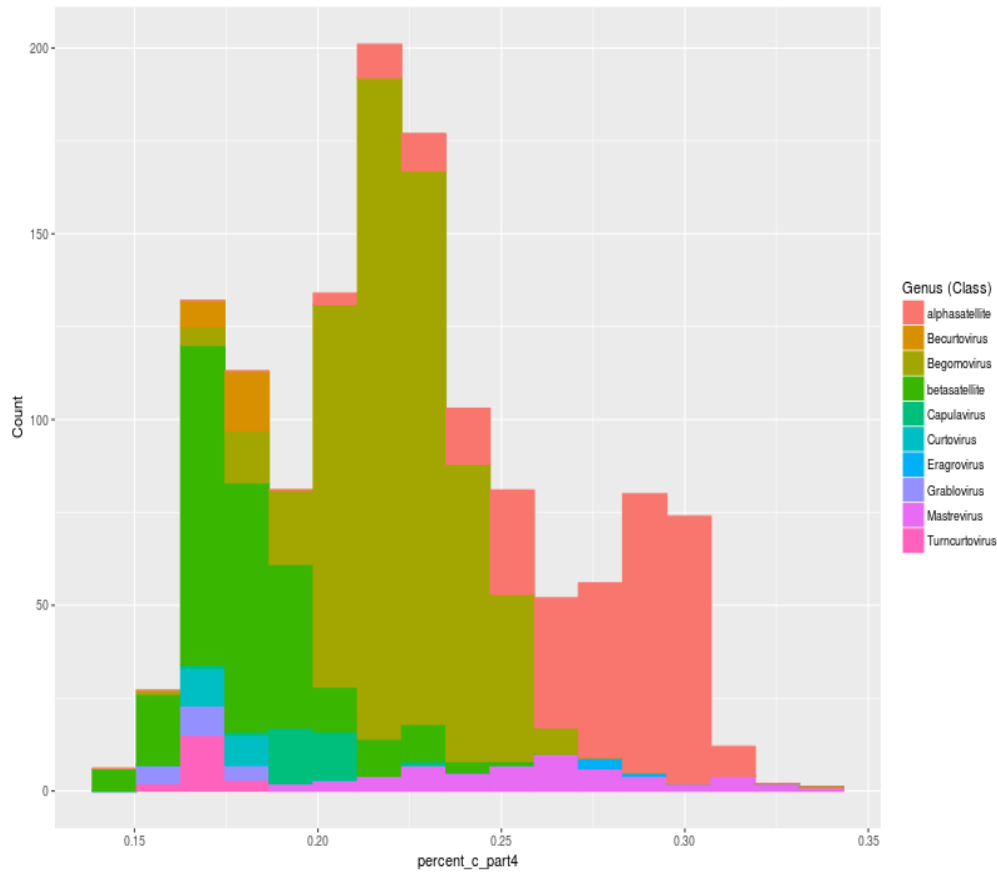

Density

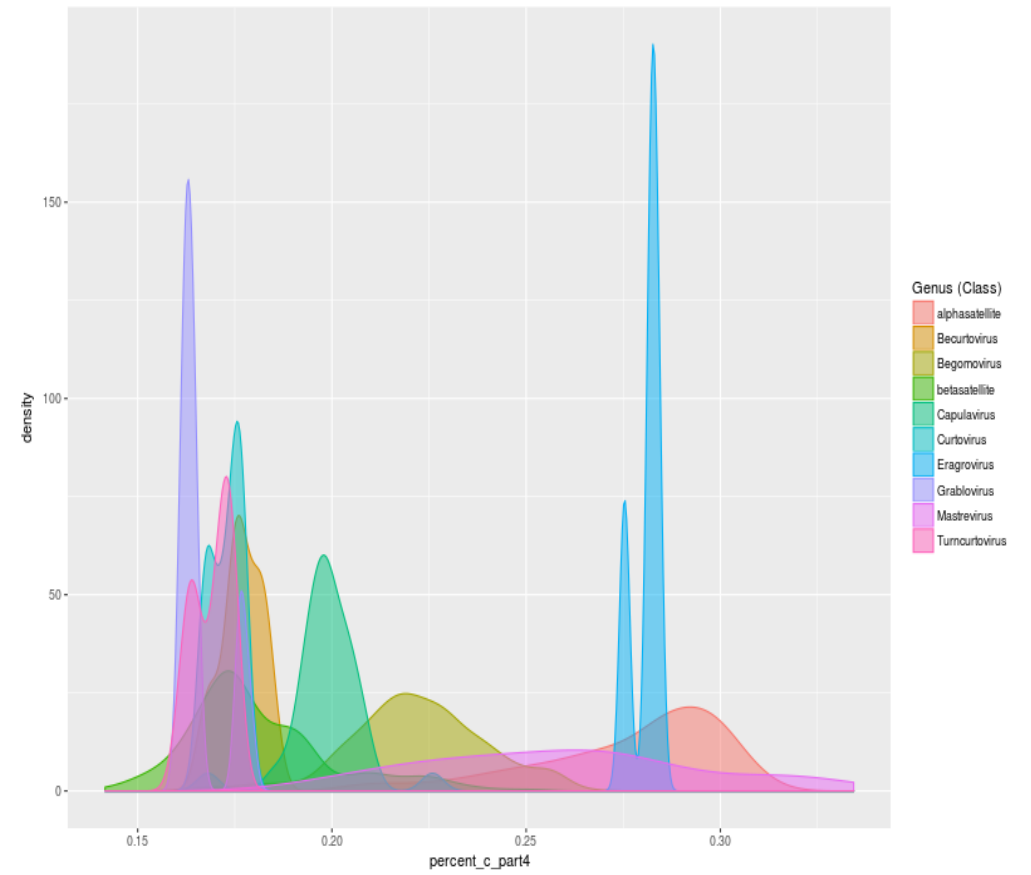

Boxplots

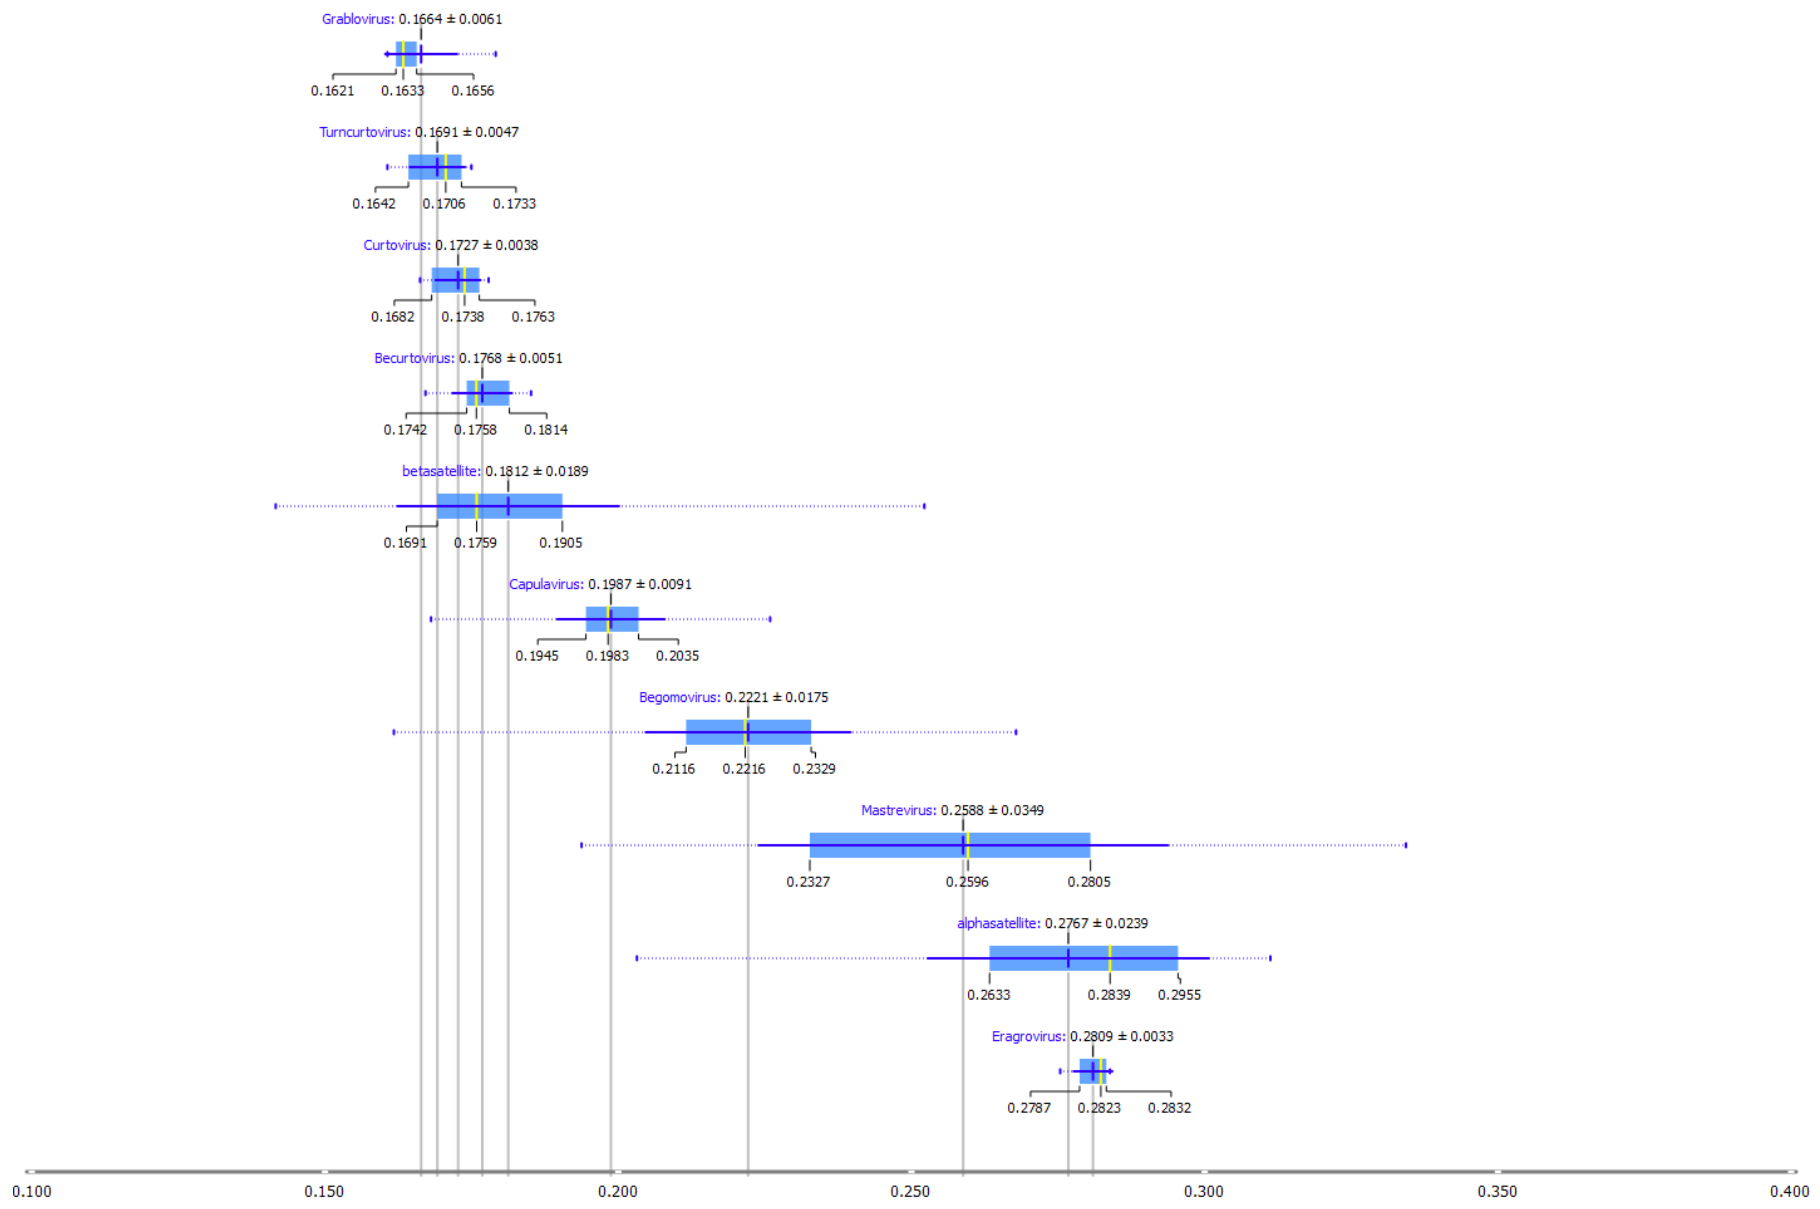

## Proportion of Guanine and Cytosine in region 1

Histogram

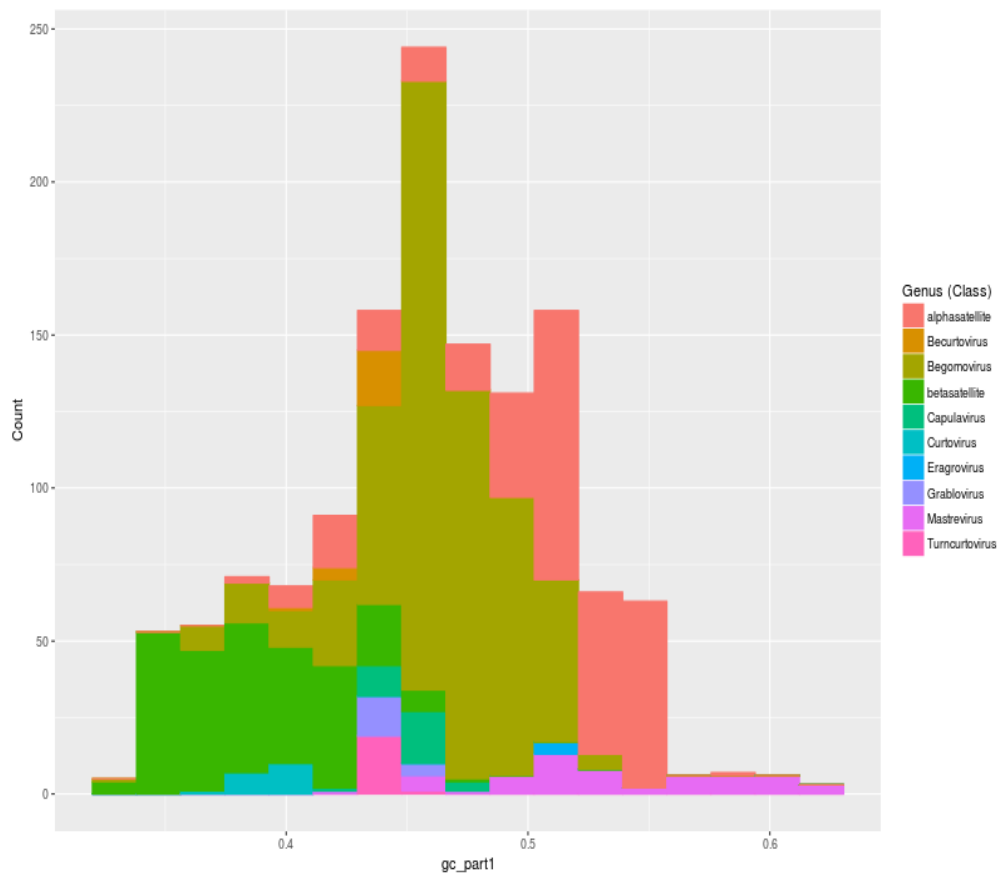

Density

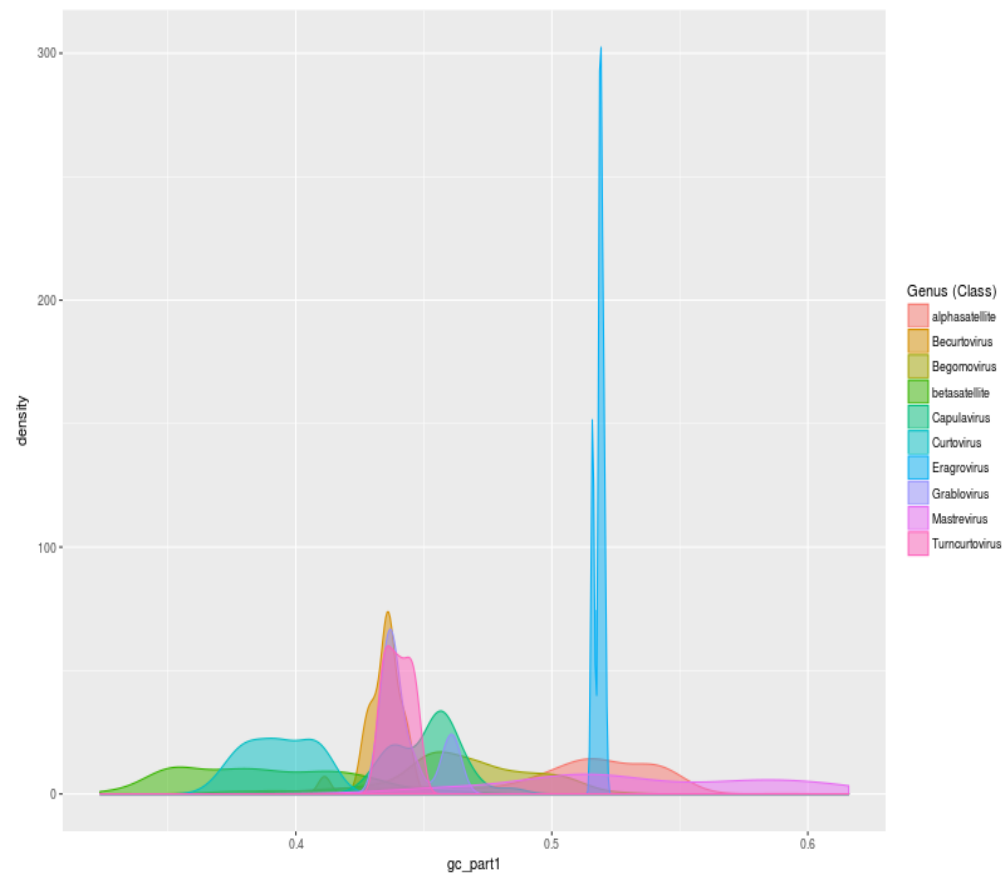

Boxplots

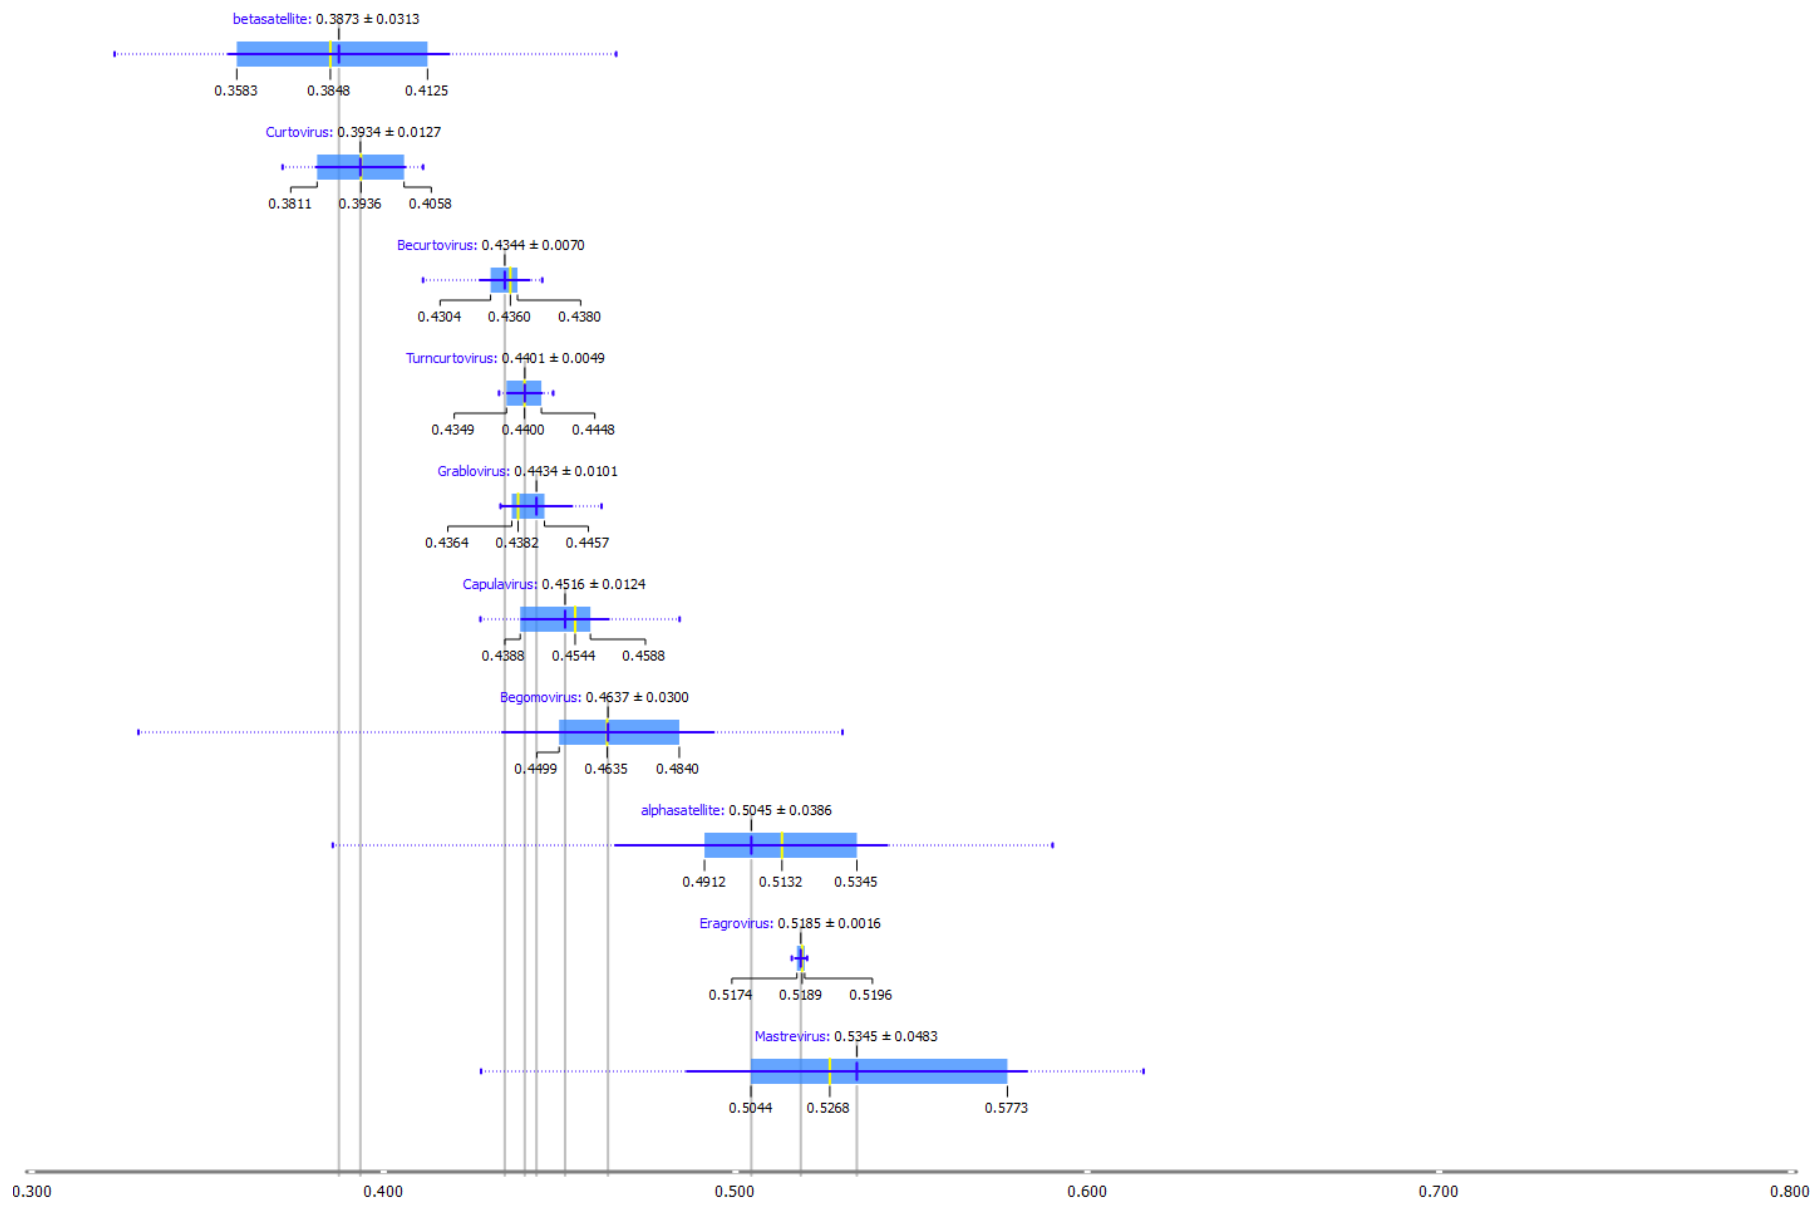



## Proportion of Guanine and Cytosine in region 2

Histogram

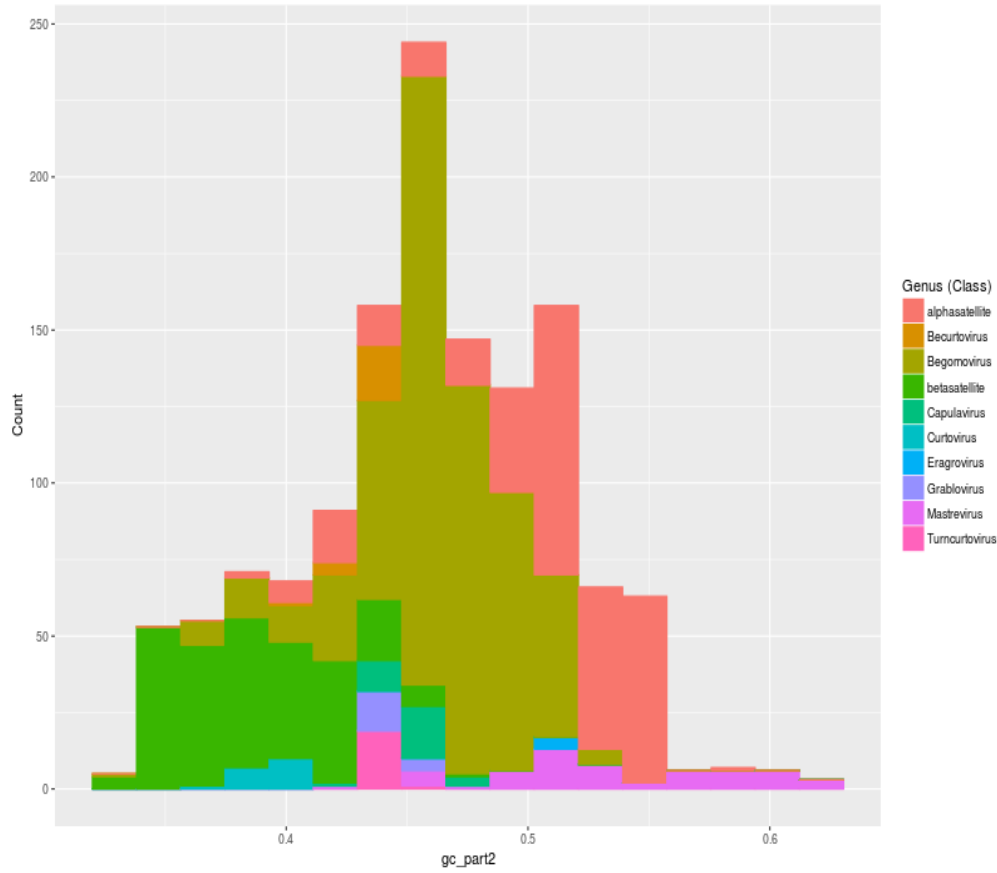

Density

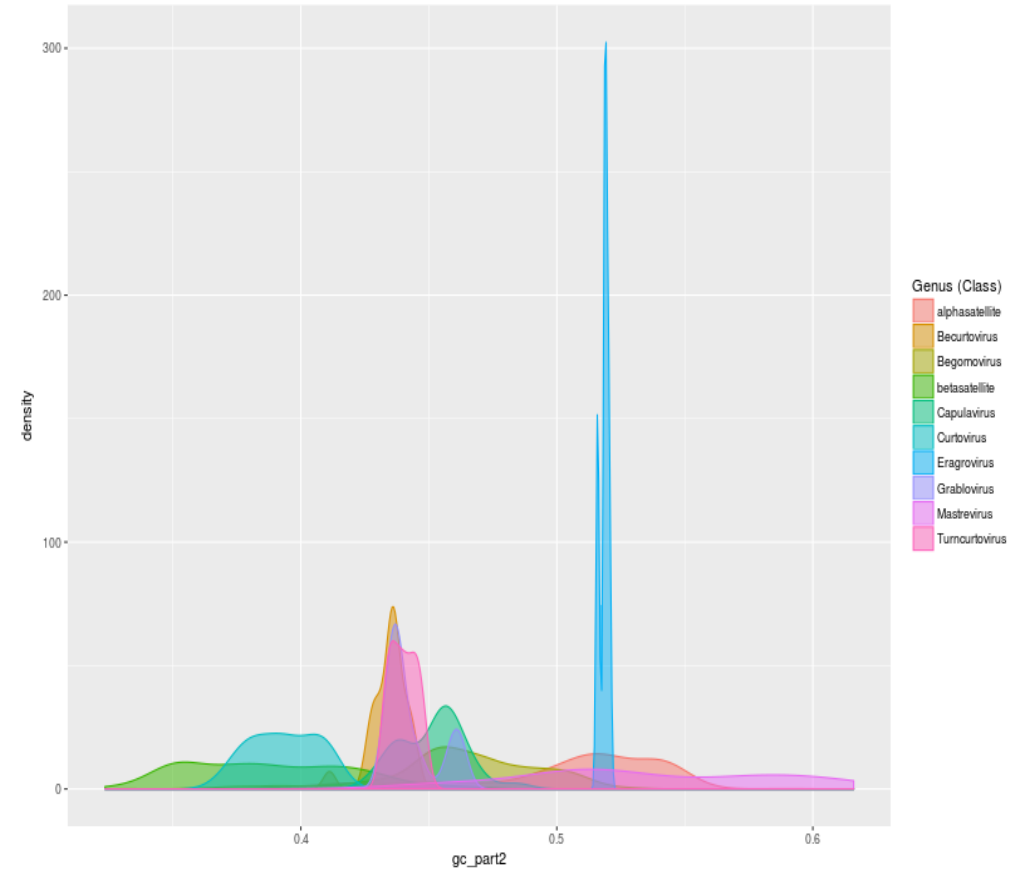

Boxplots



### Proportion of Guanine and Cytosine in region 3

Histogram

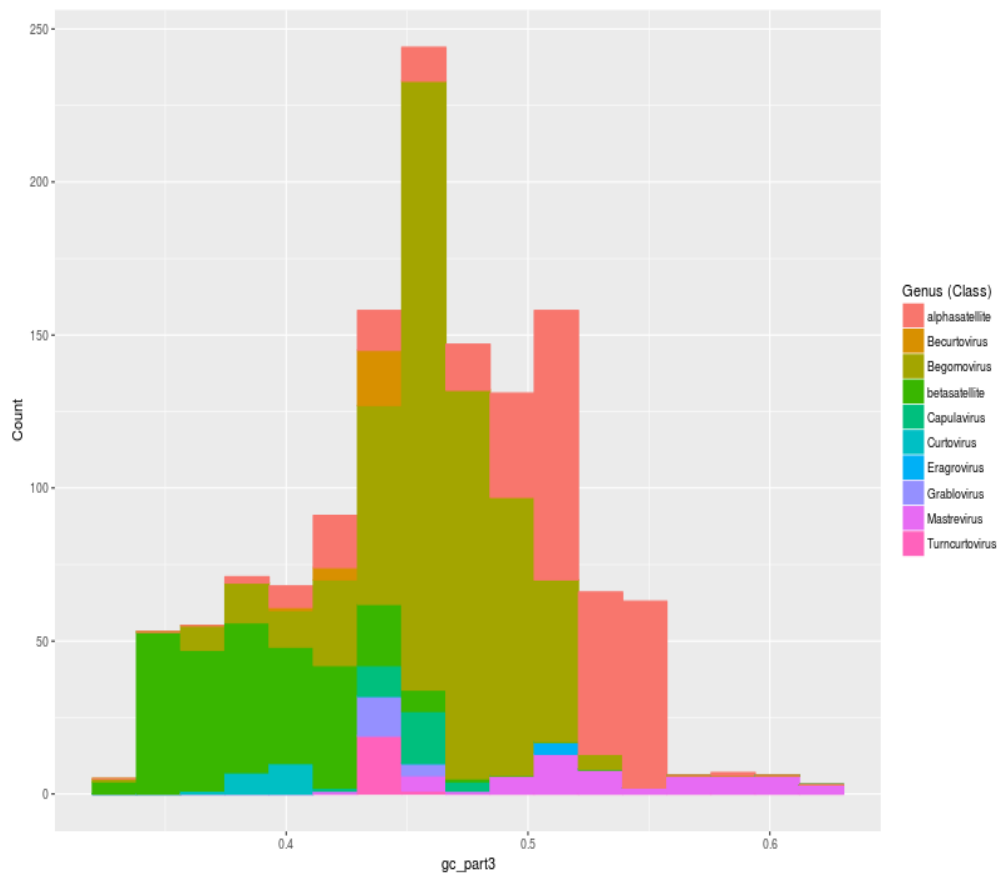

Density

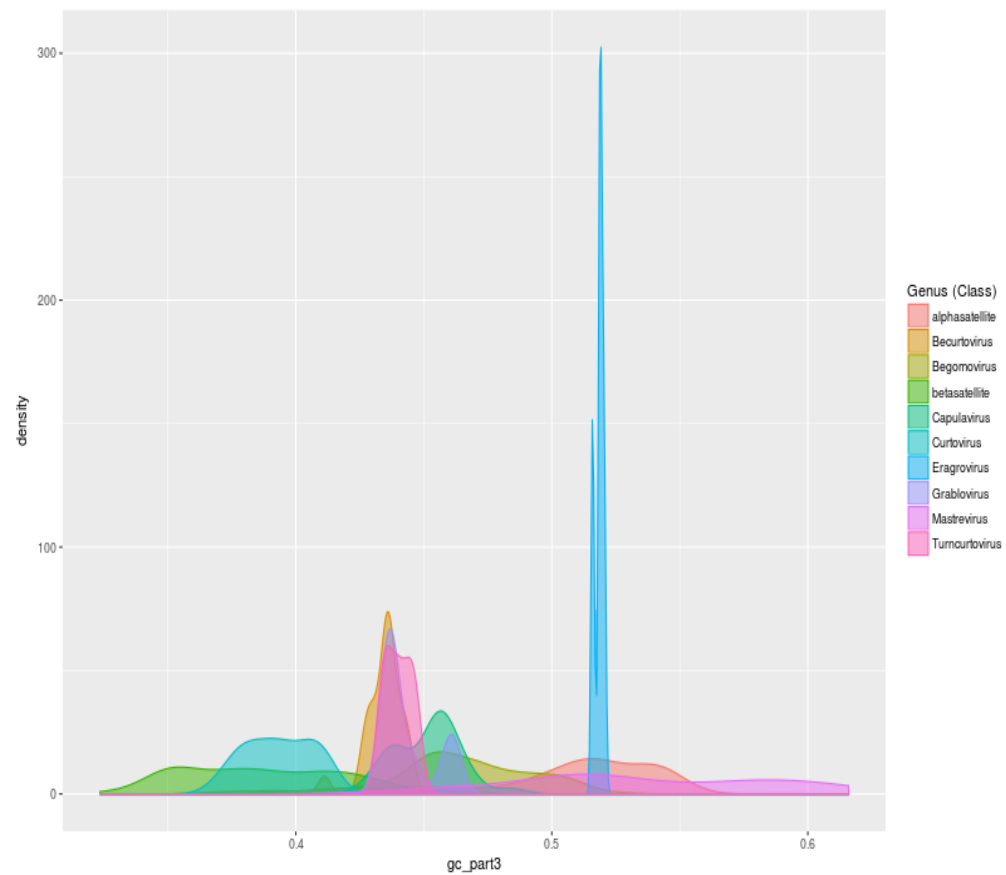

Boxplots



## Proportion of Guanine and Cytosine in region 4

Histogram

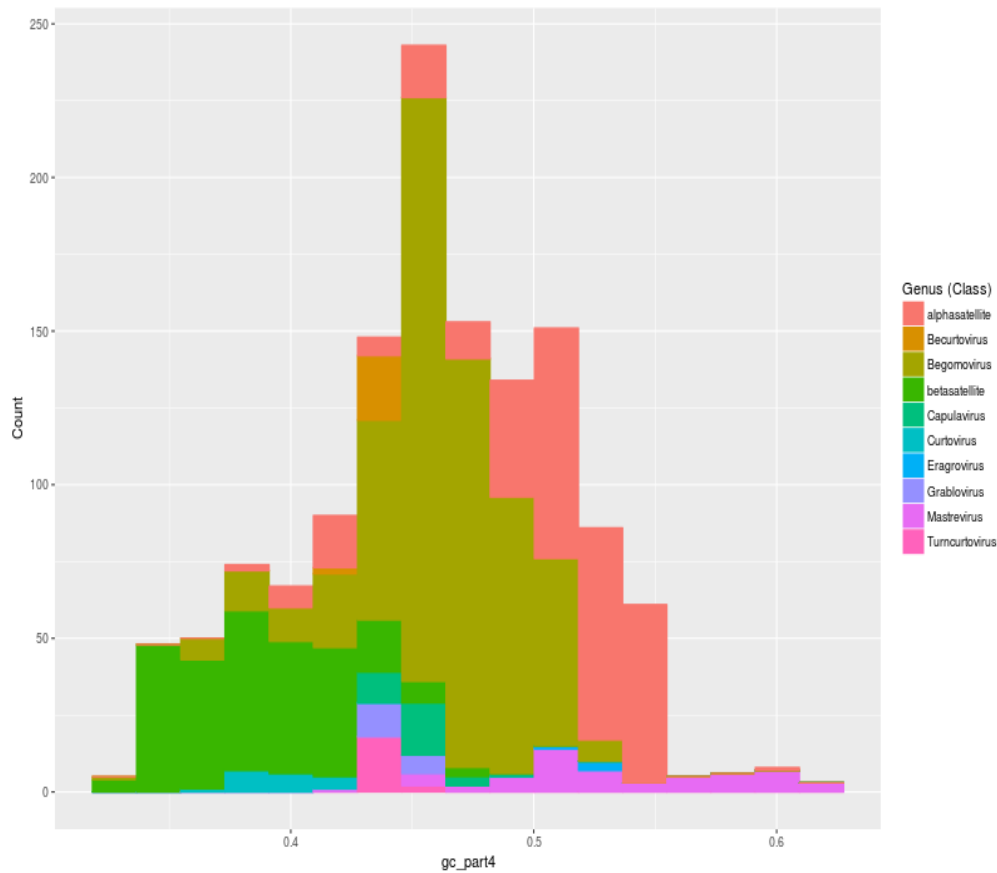

Density

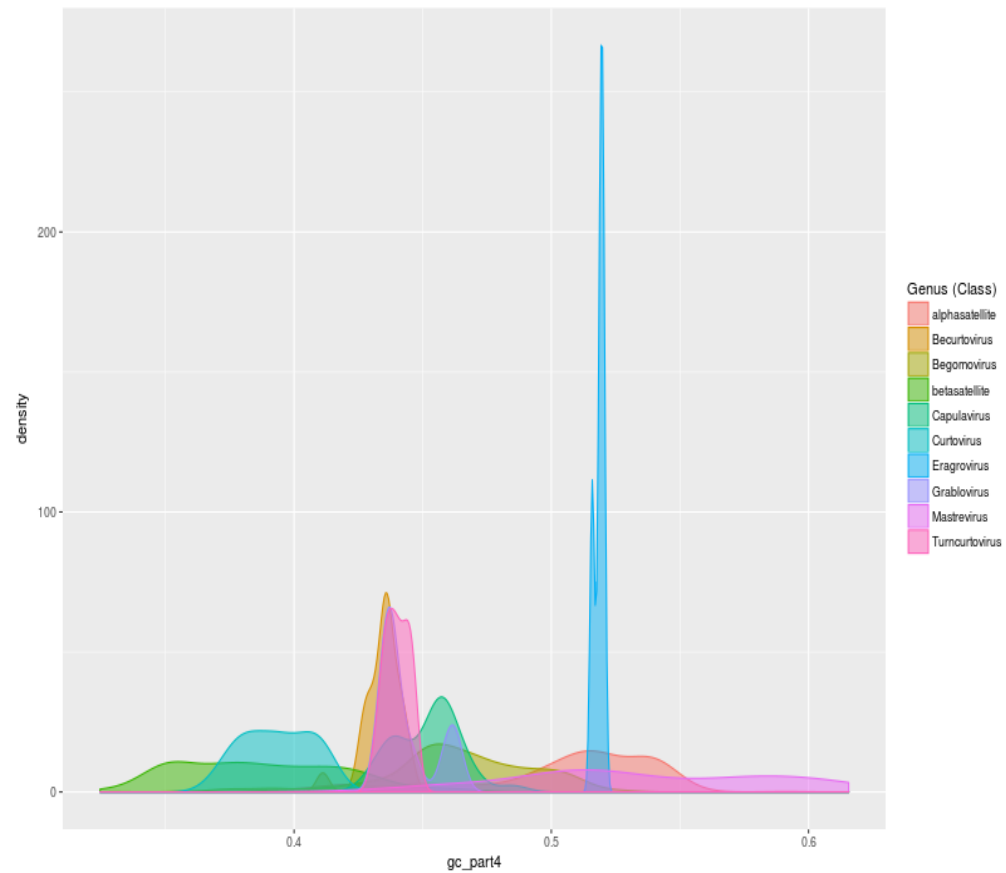

Boxplots

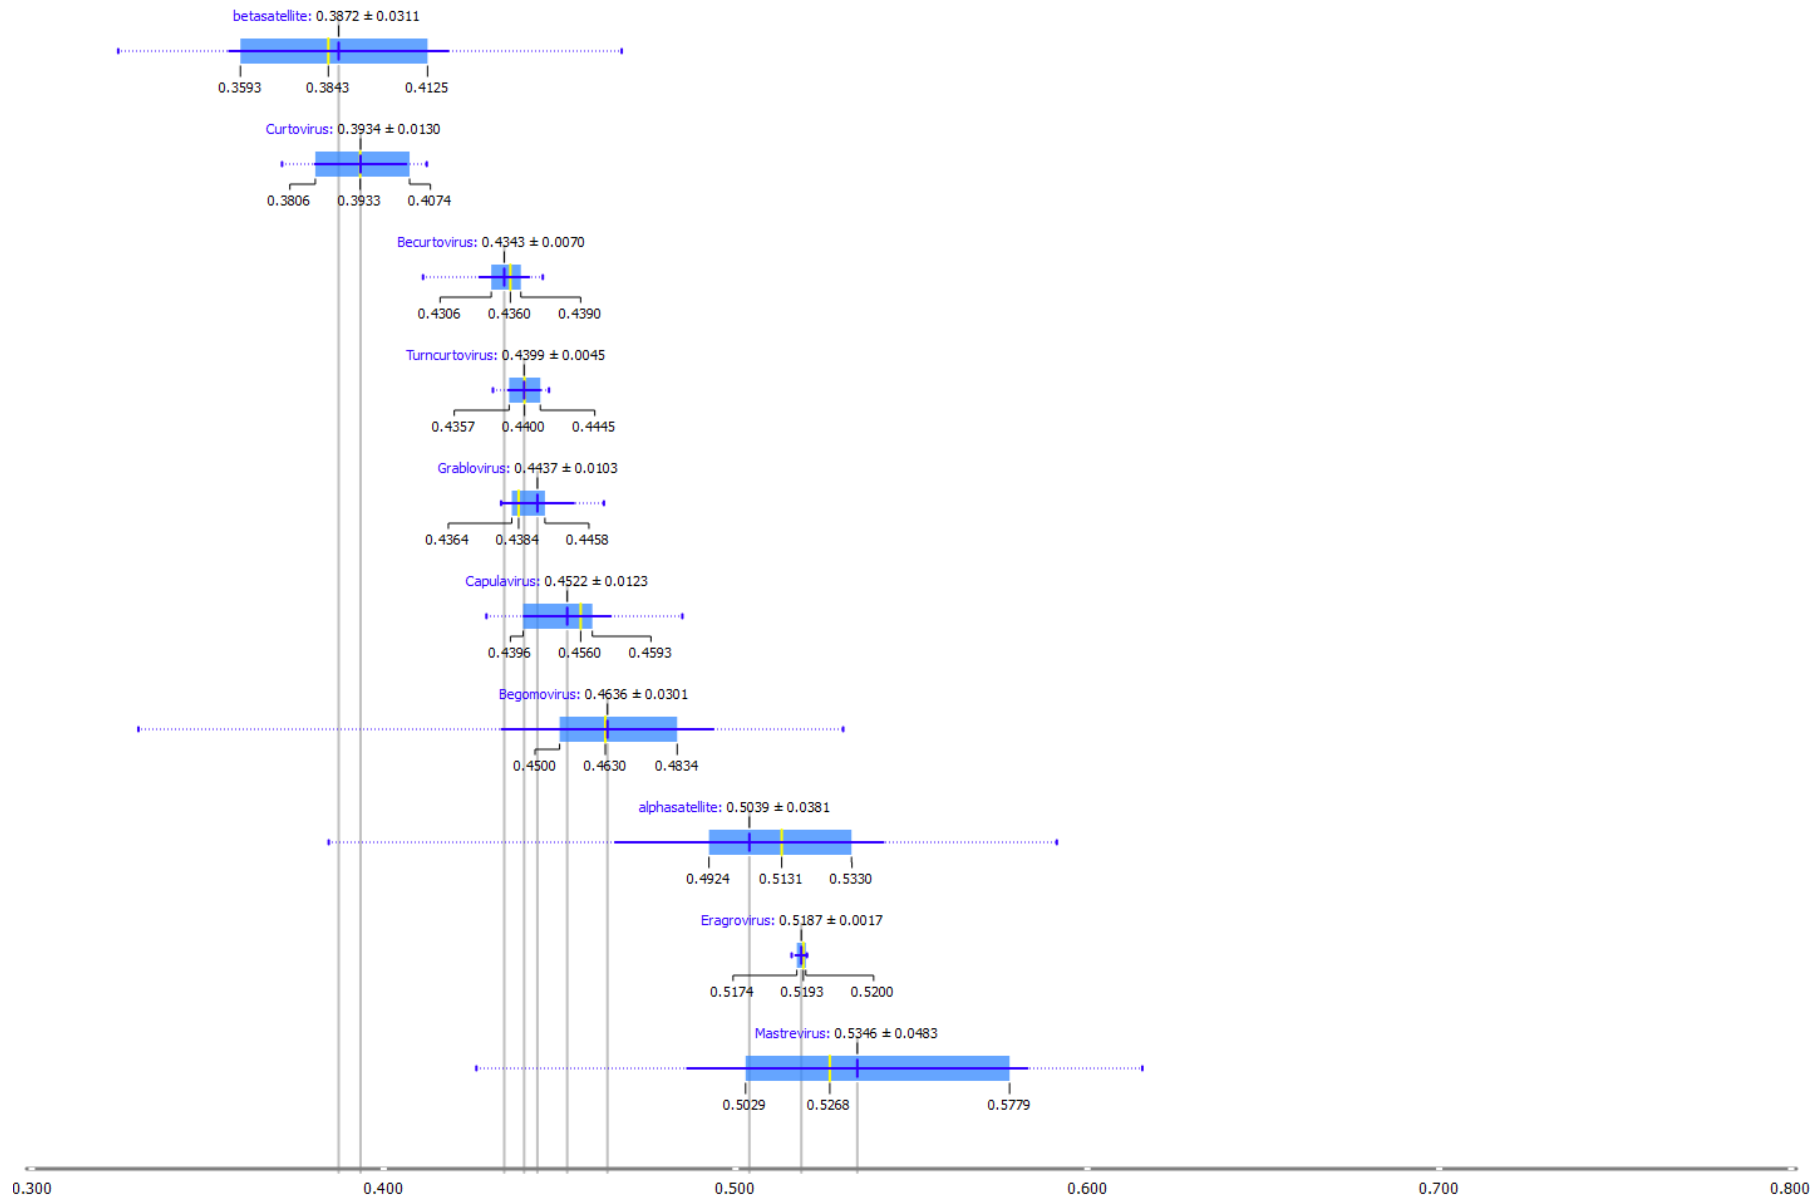

# Charts of ORF attributes

## Proportion of Arginine

Histogram

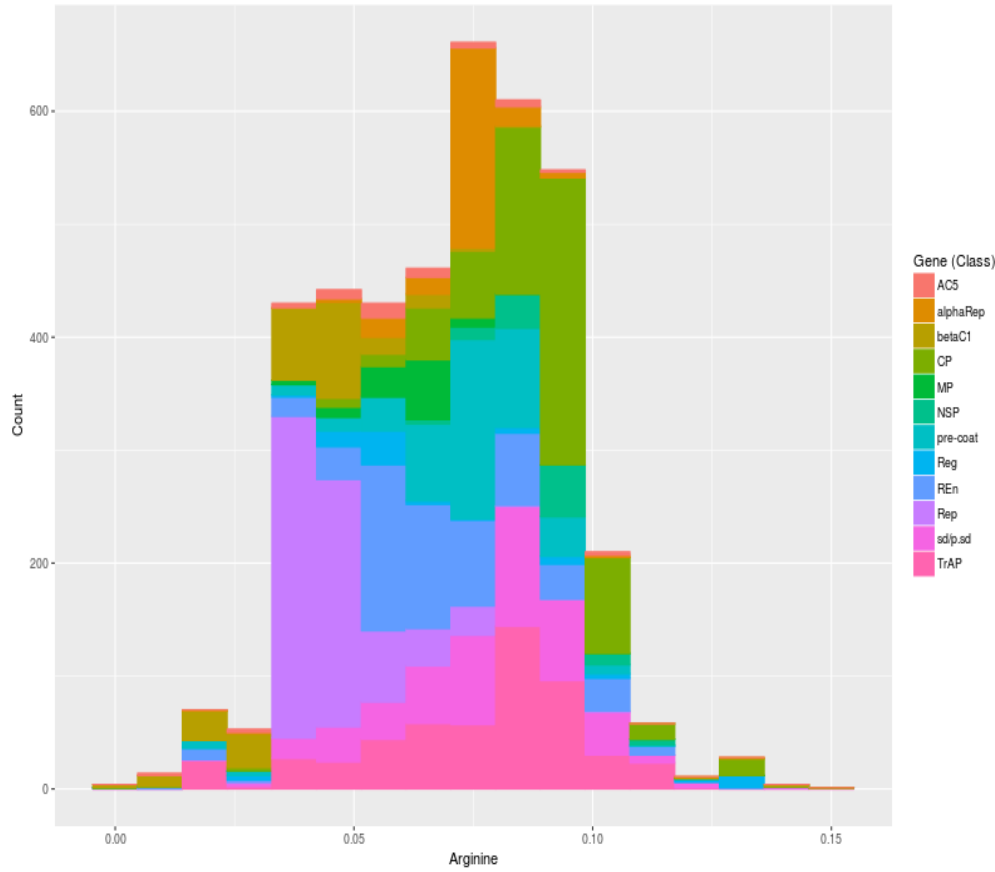

Density

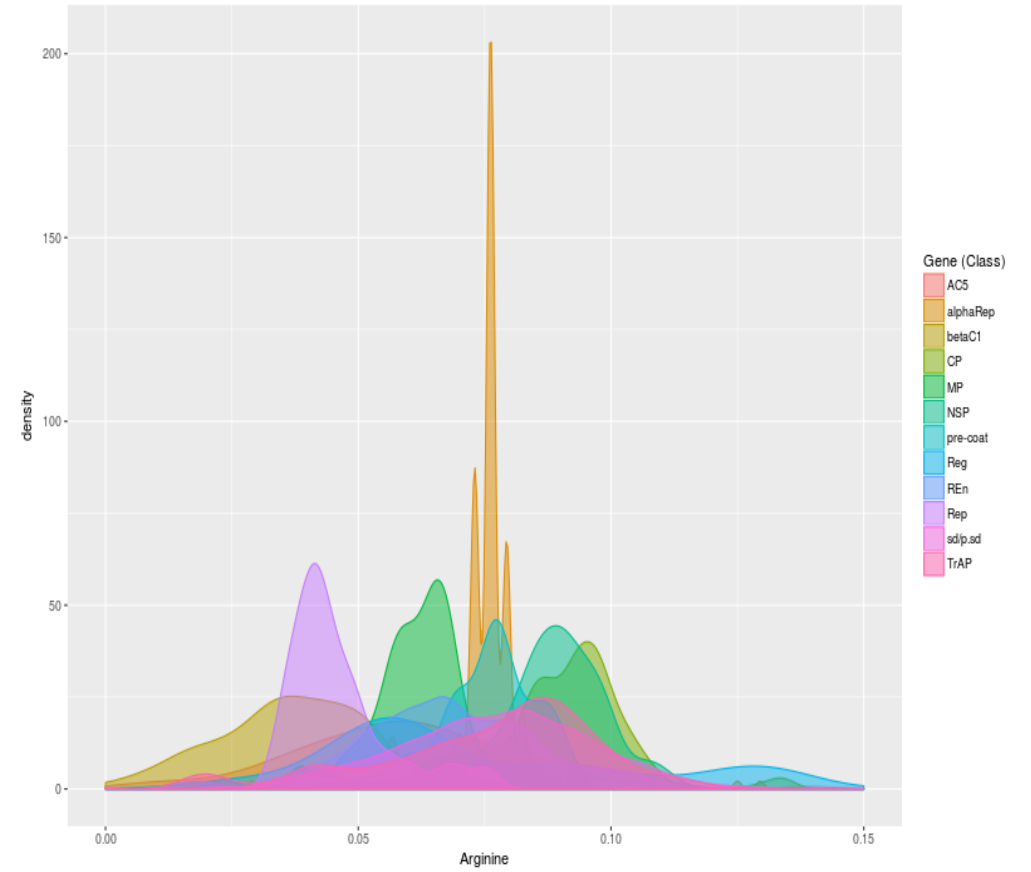

Boxplots

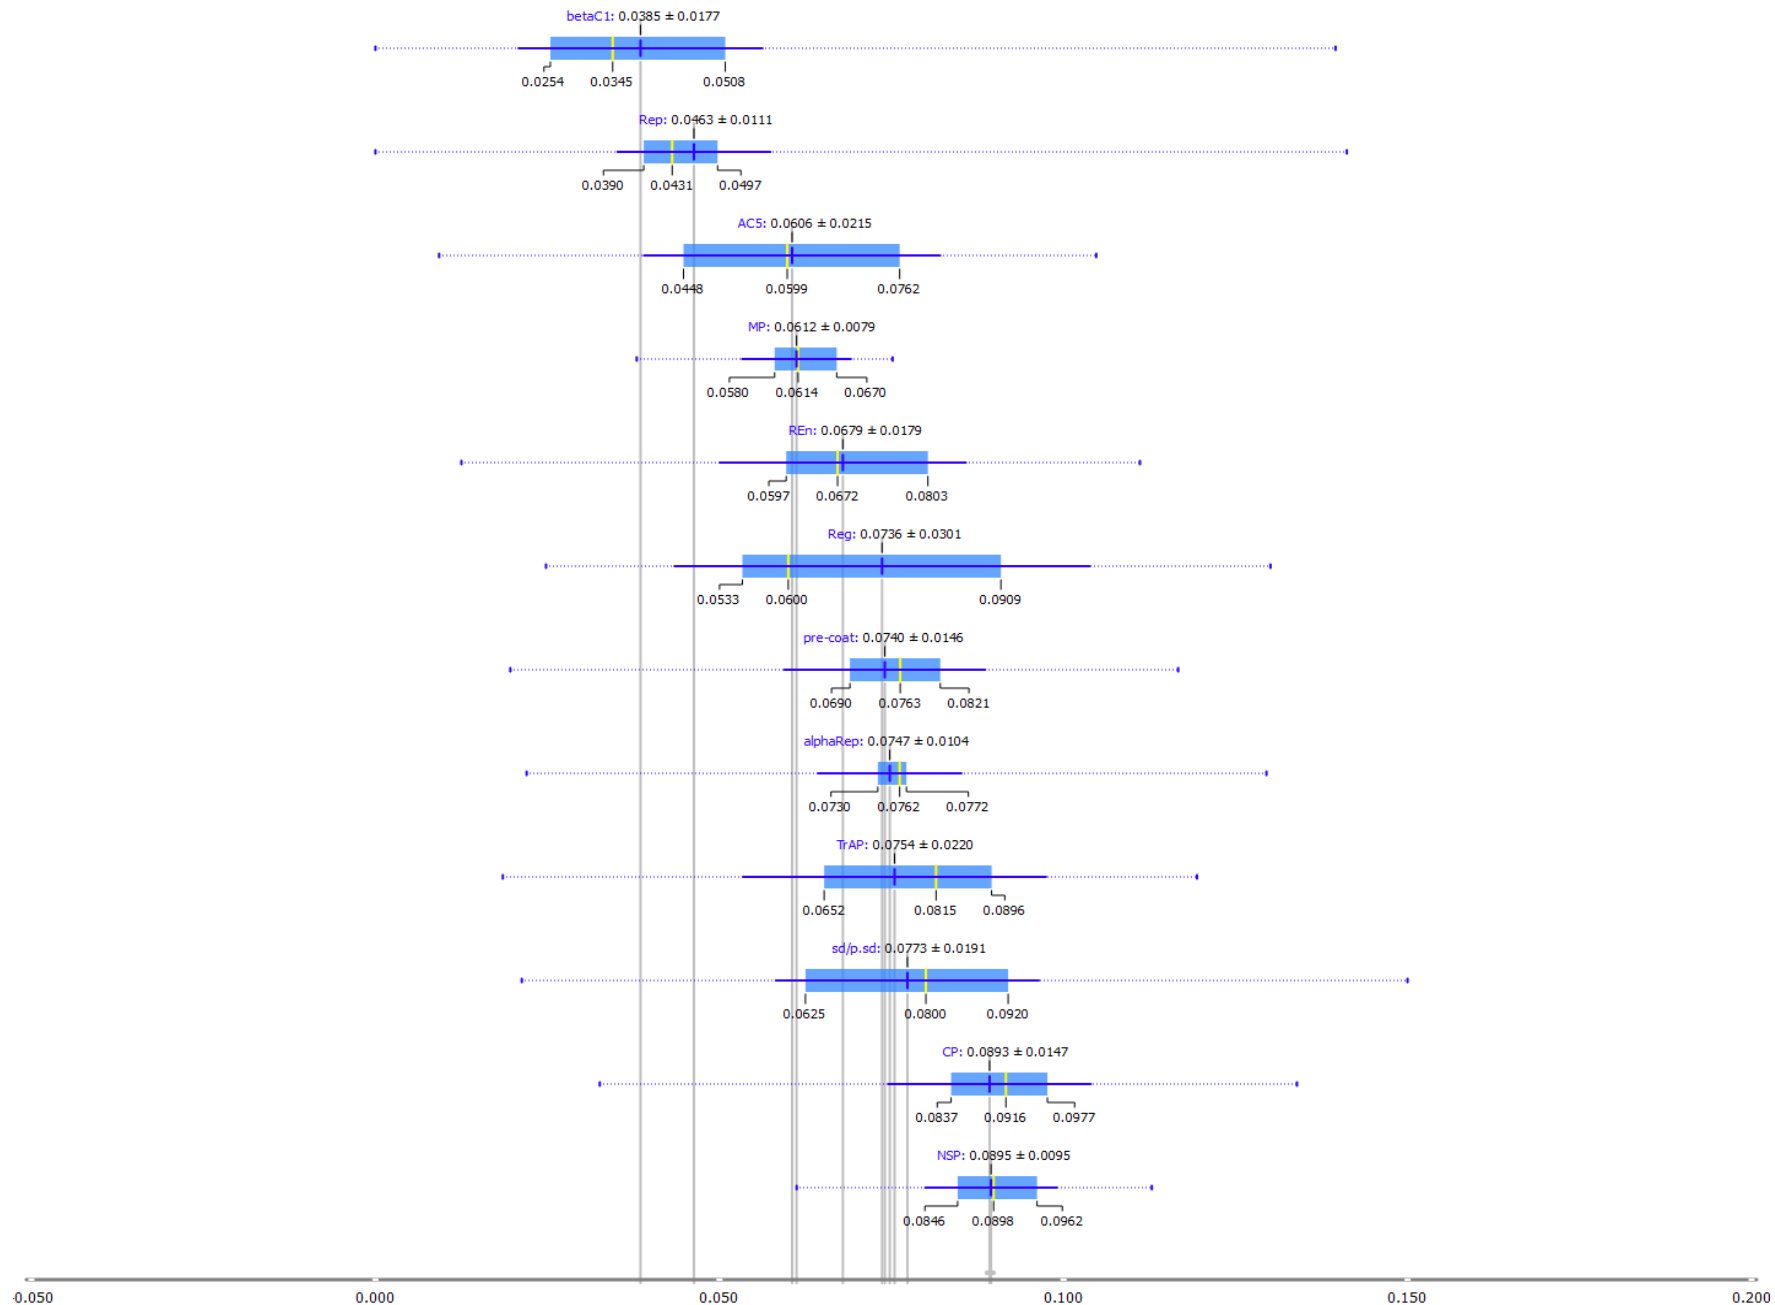



# Proportion of Alanine

Histogram

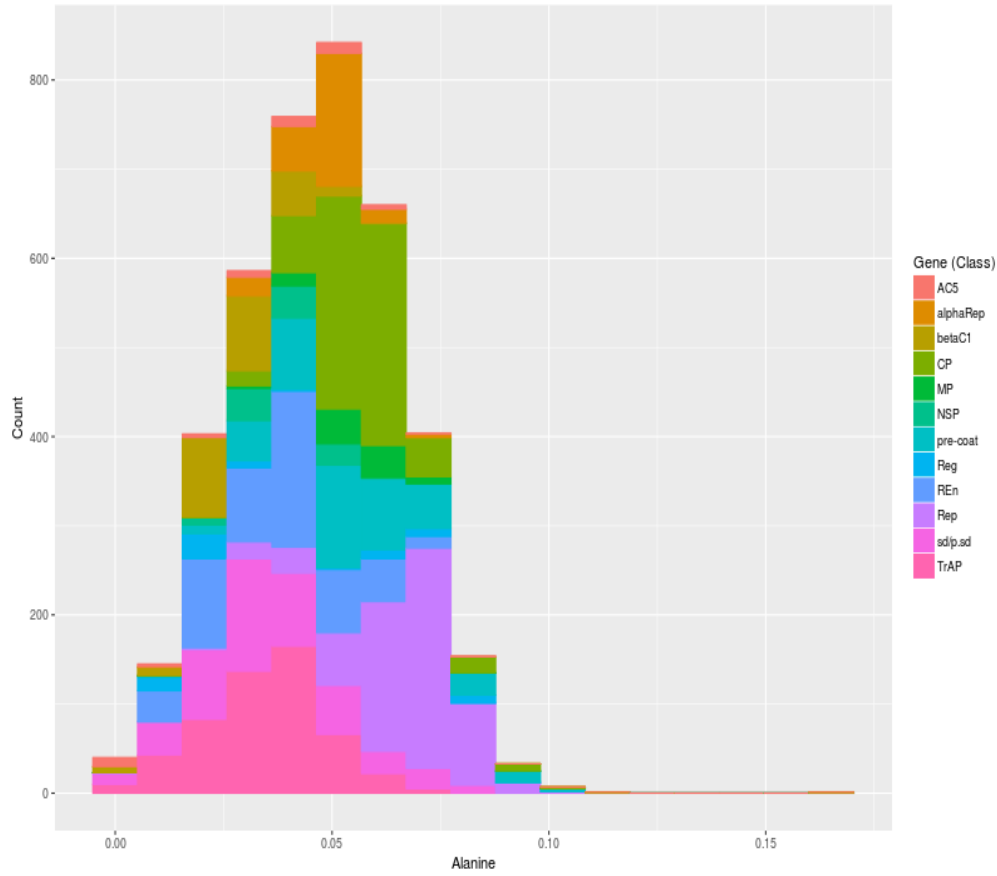

Density

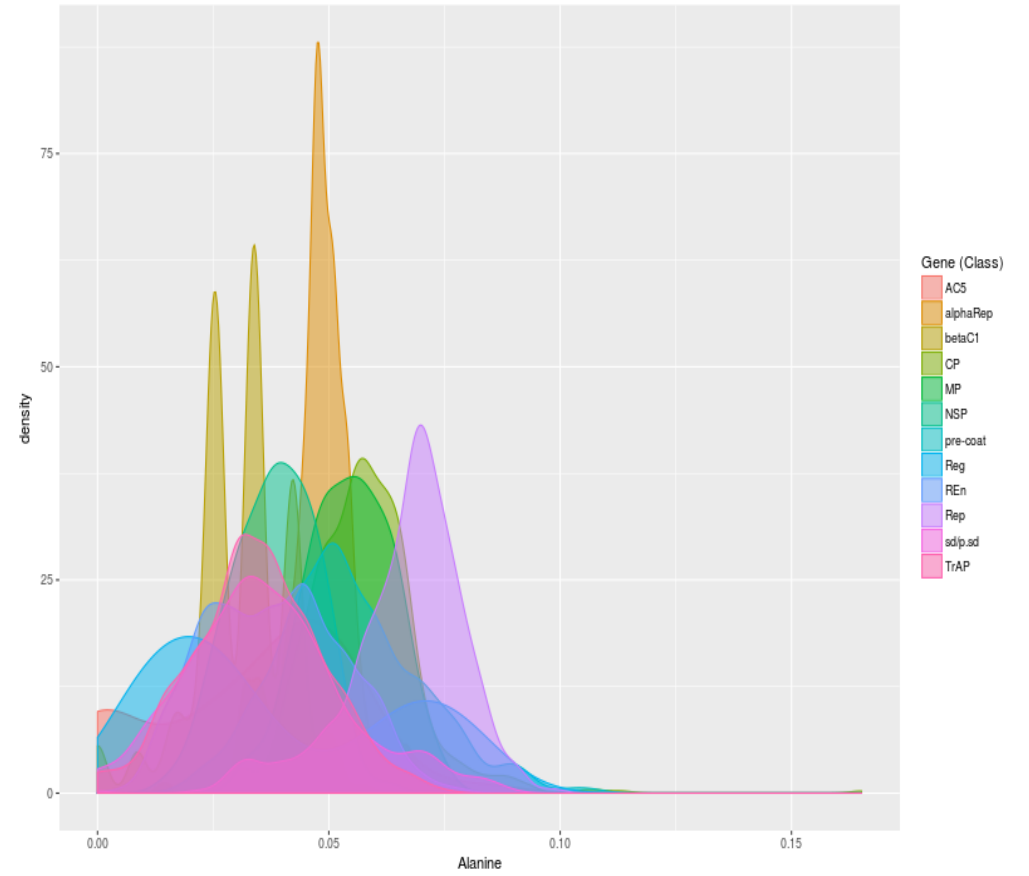

Boxplots

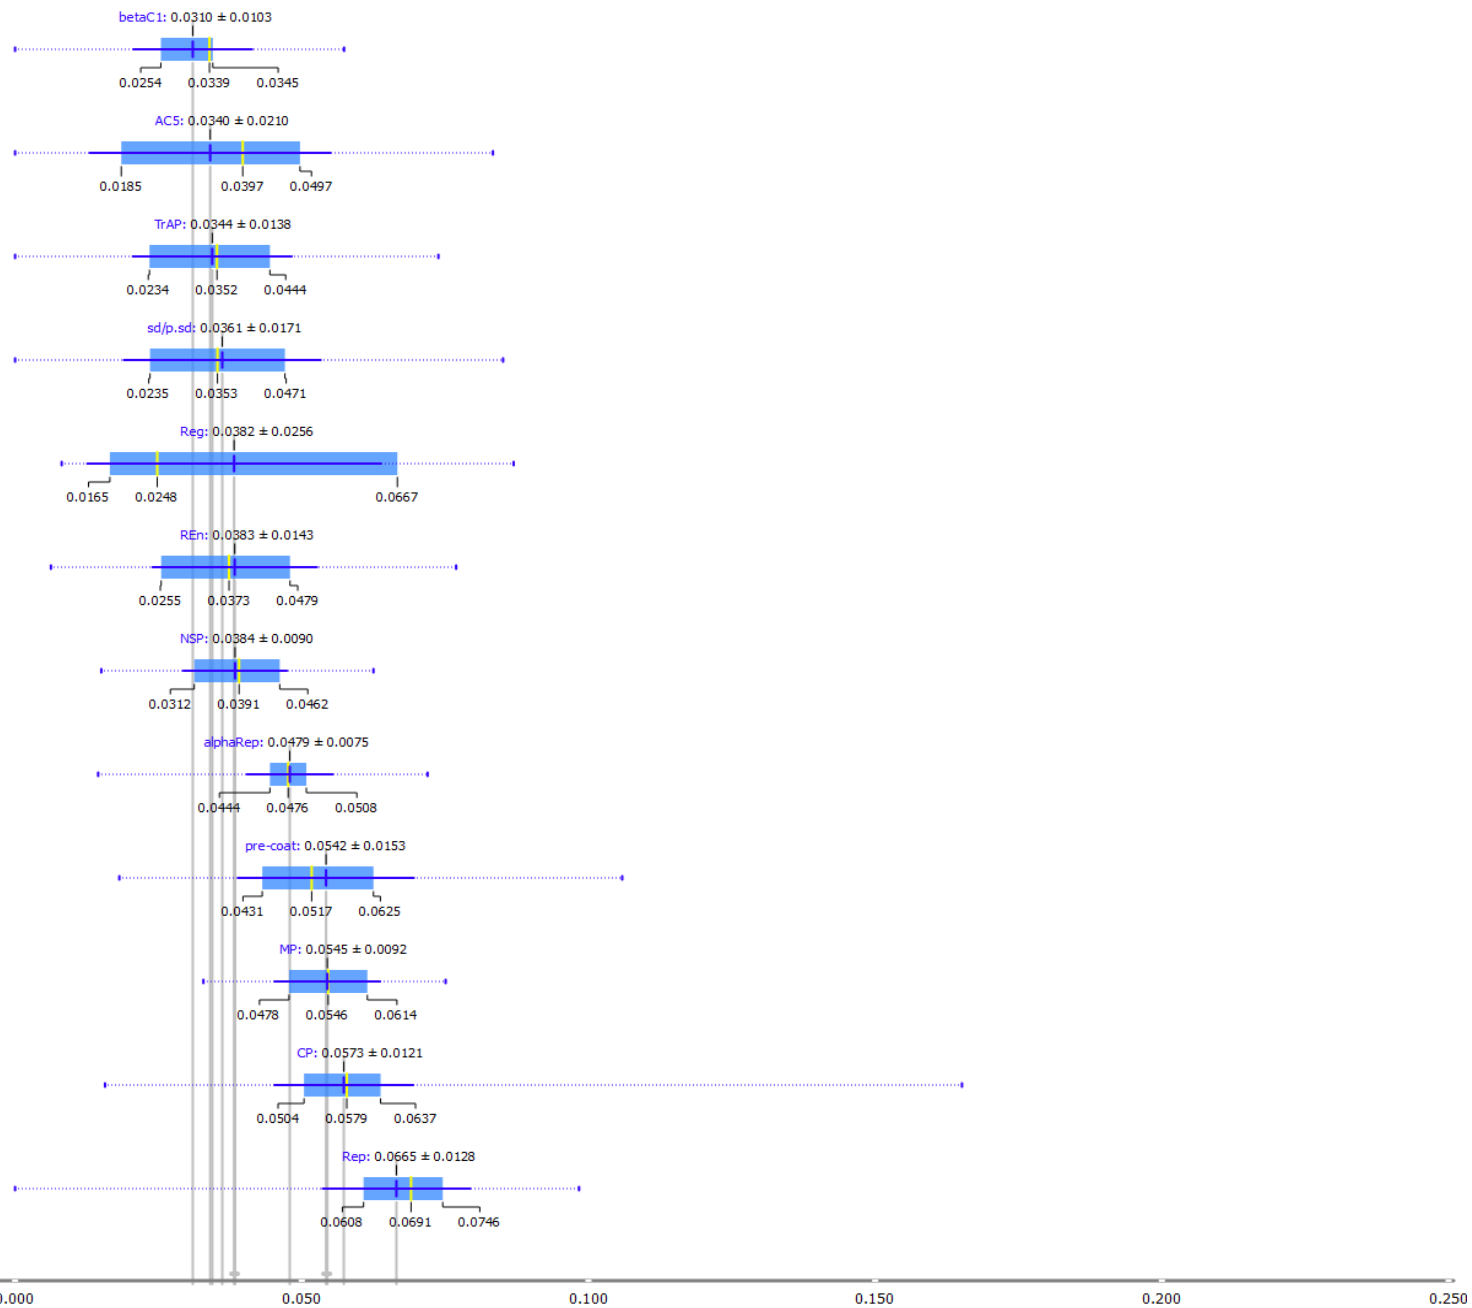

# Proportion of Asparagine

Histogram

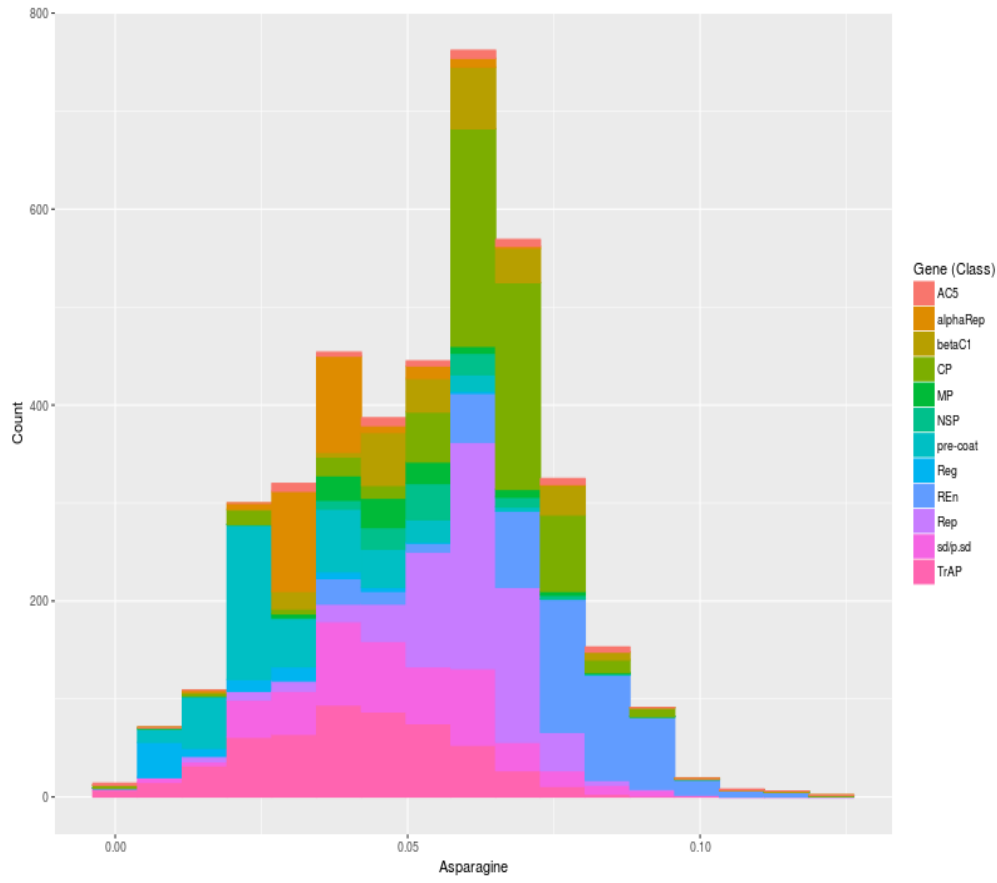

Density

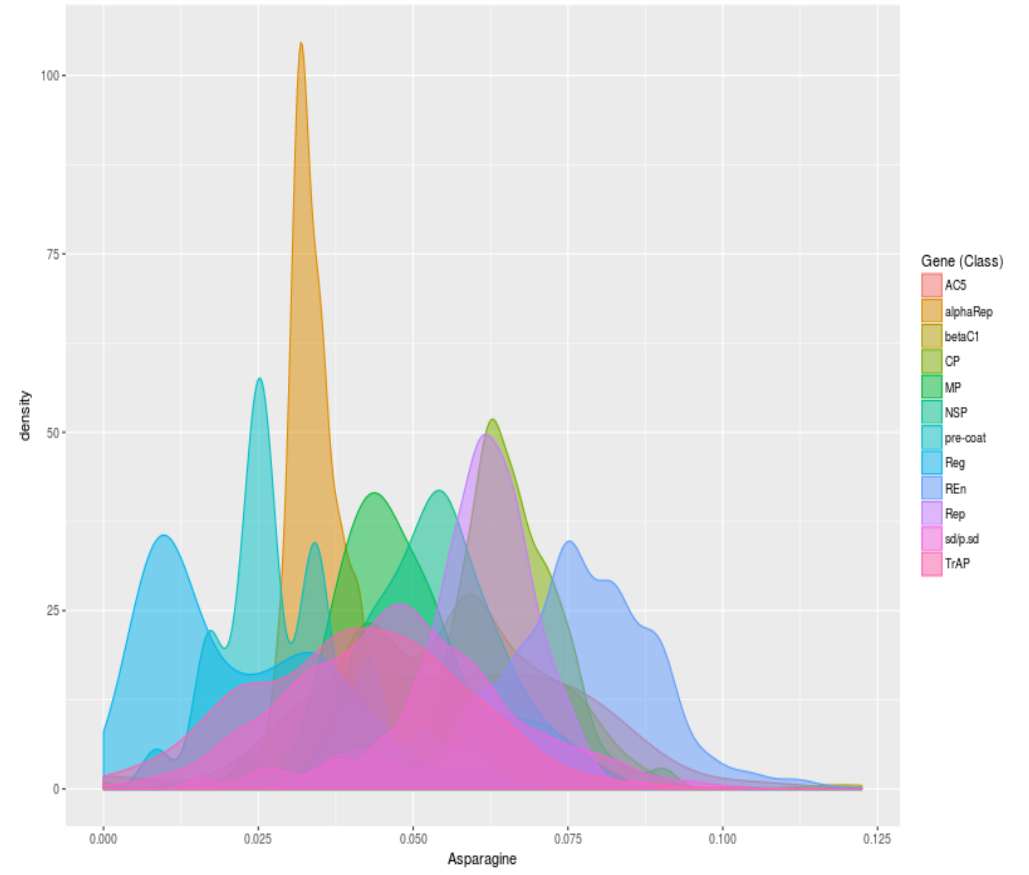

Boxplots

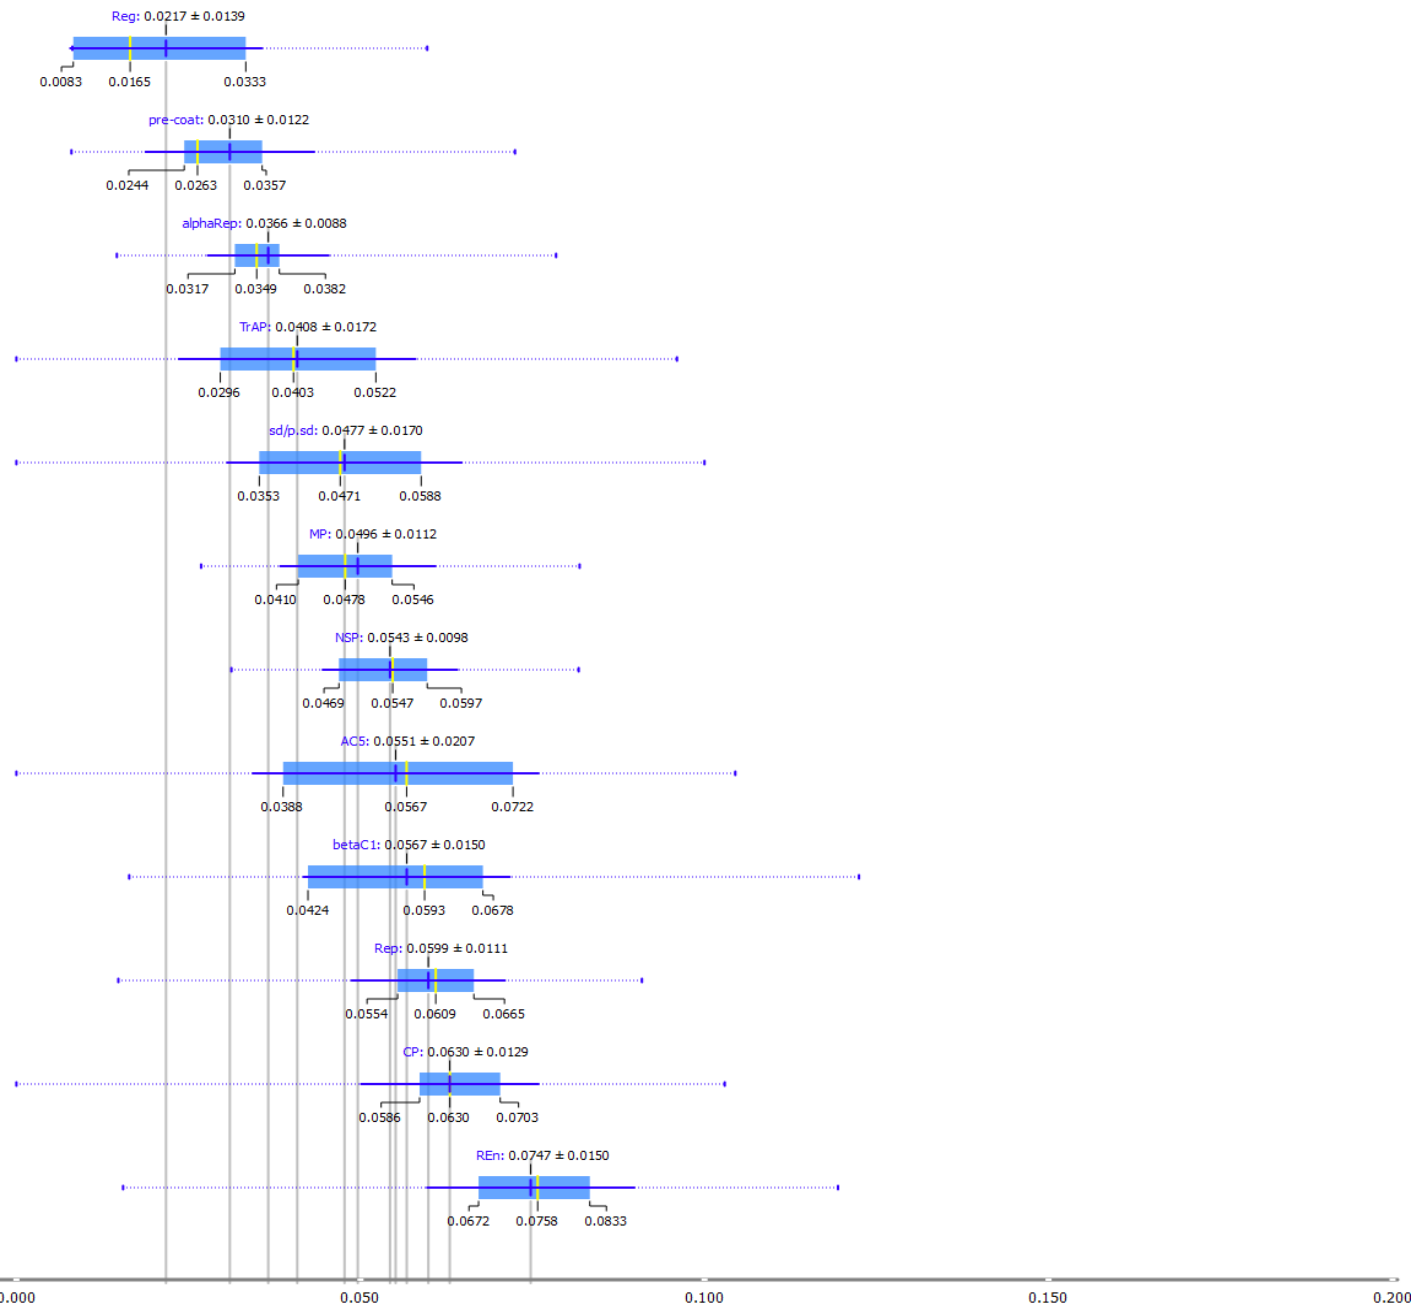

## Proportion of Aspartic Acid

Histogram

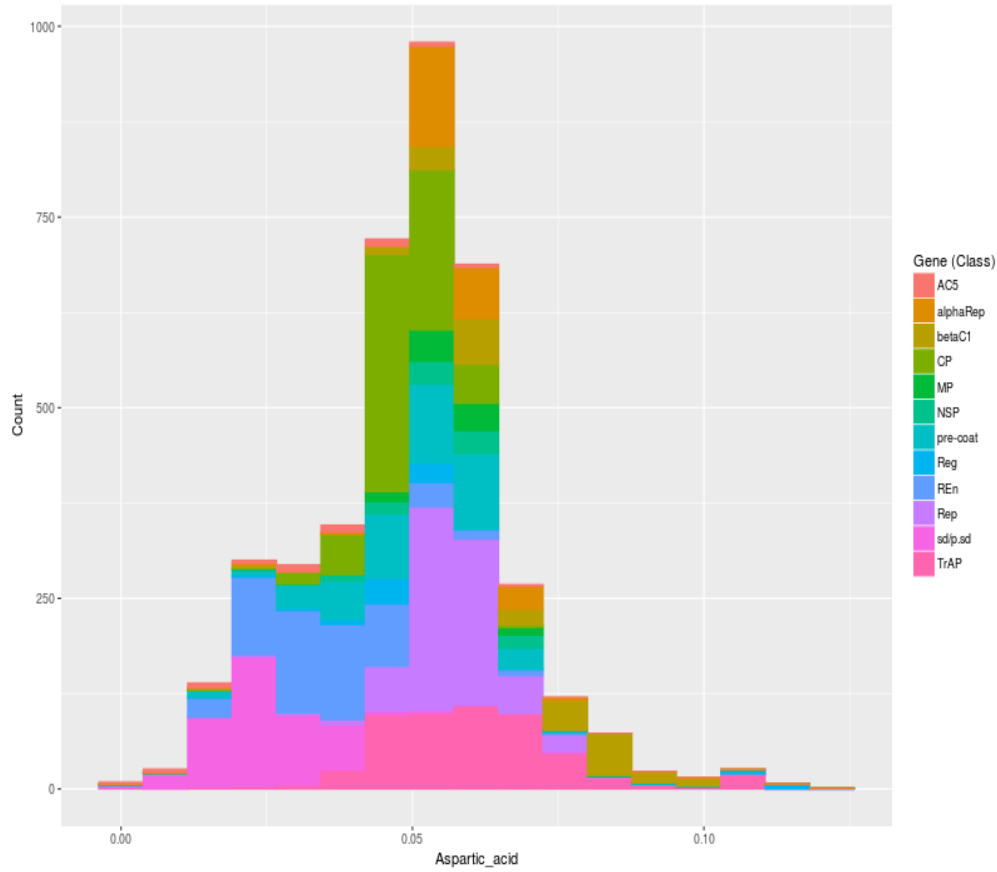

Density

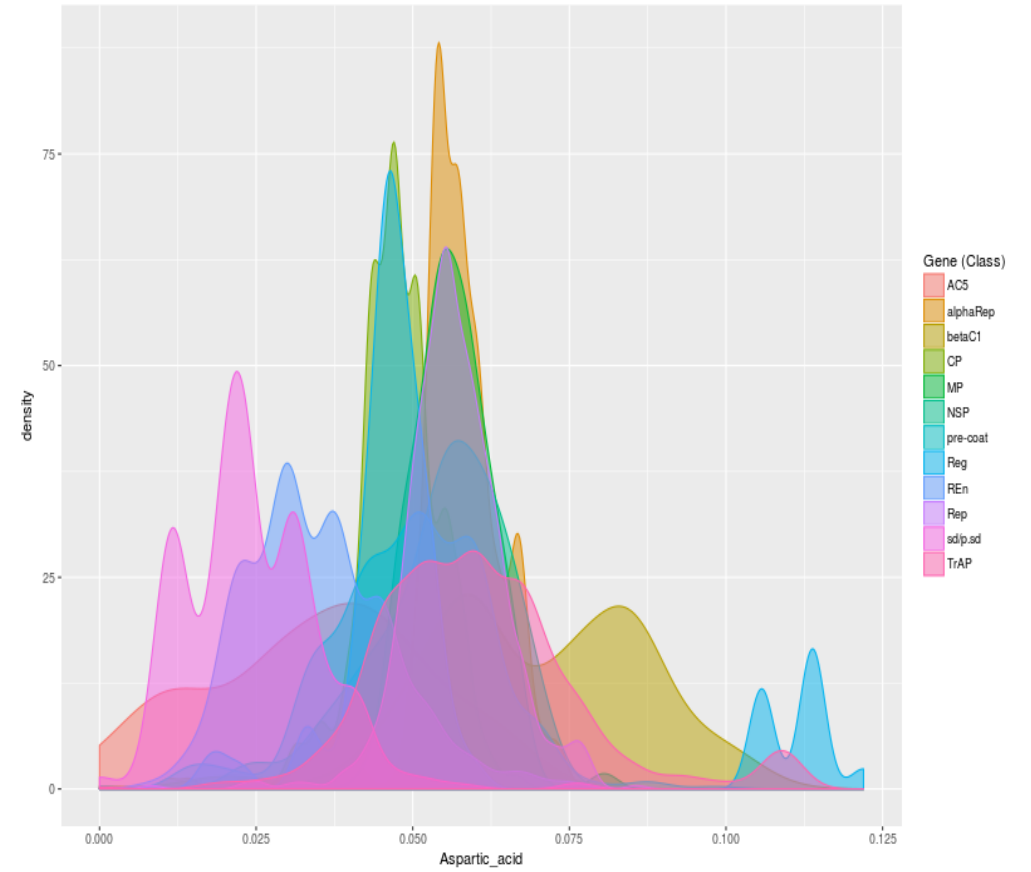

Boxplots

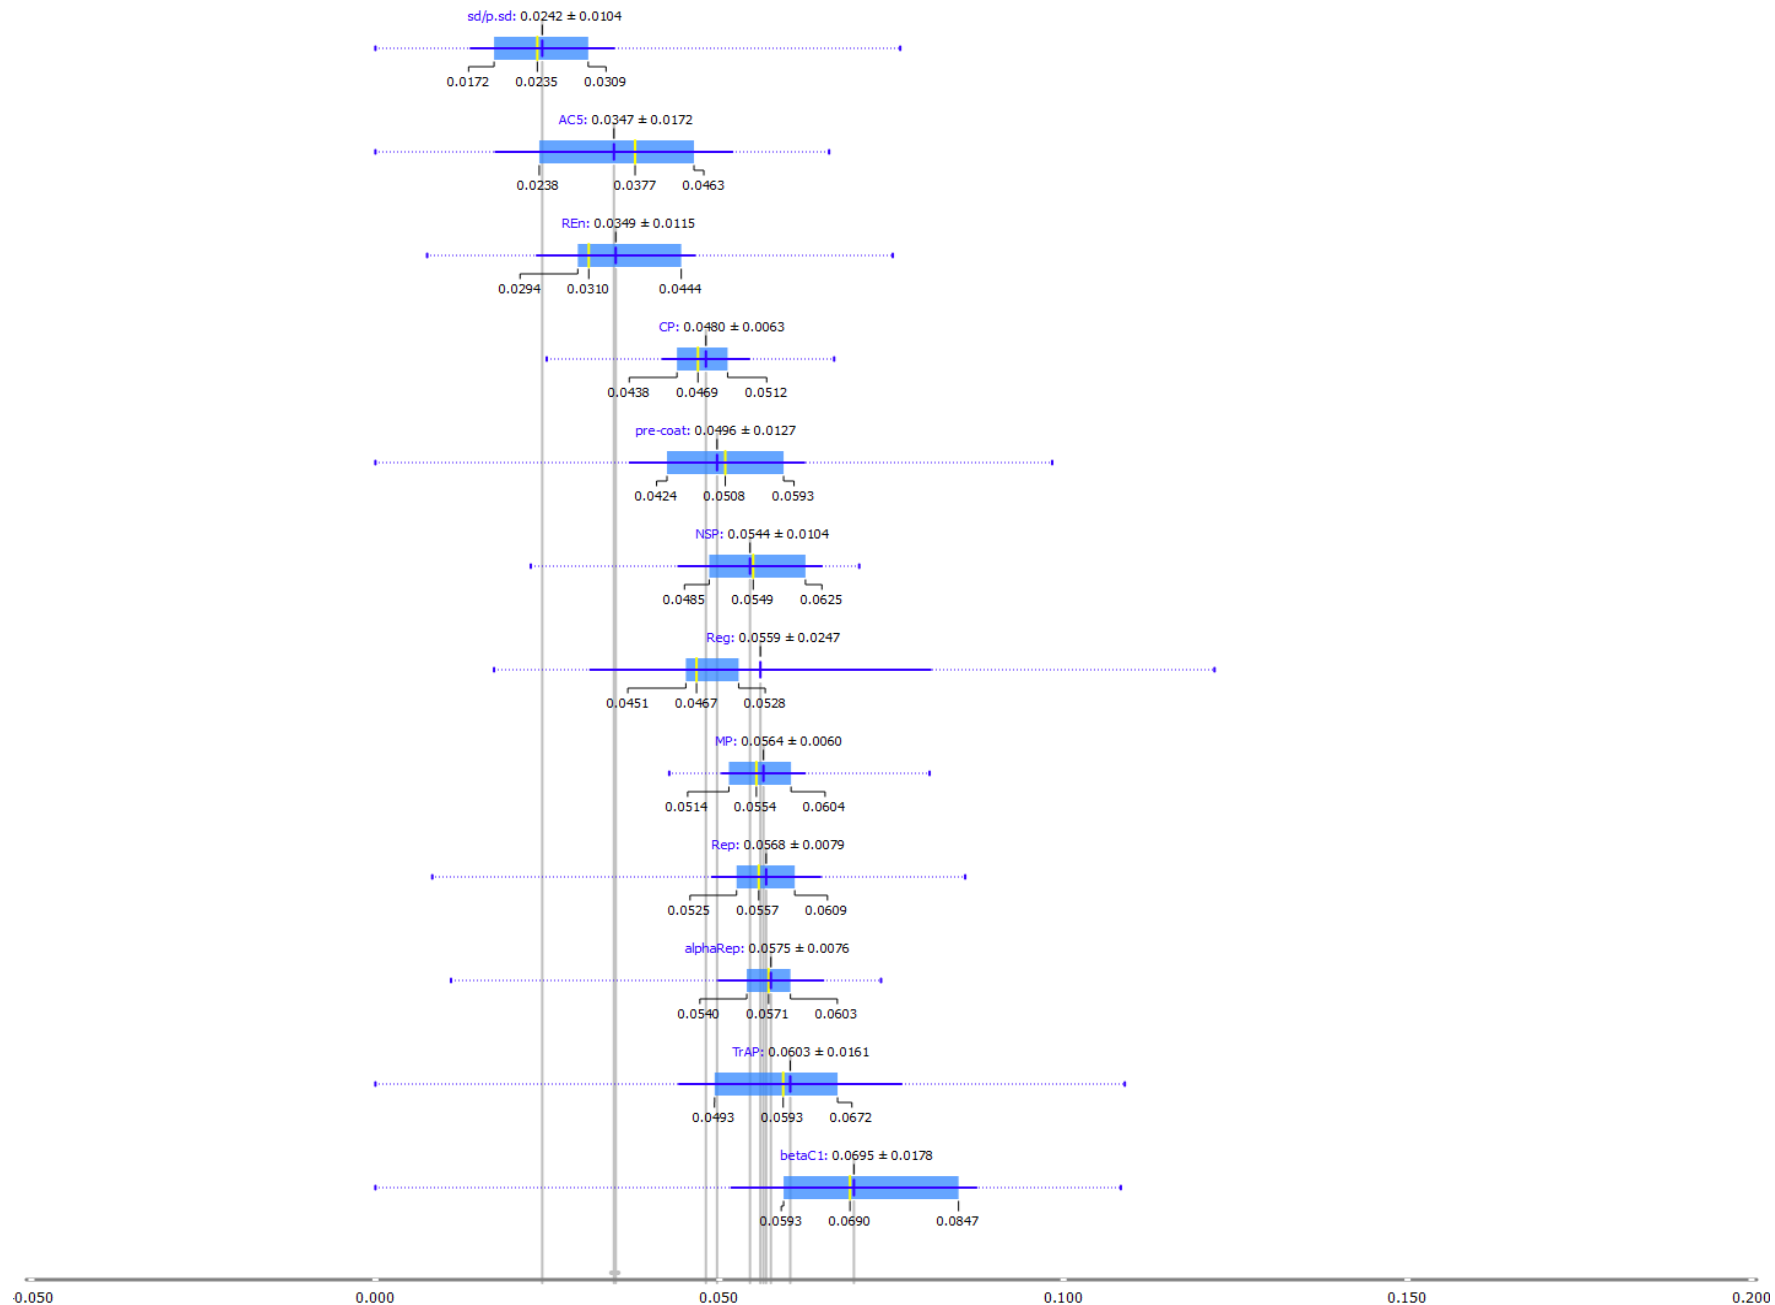

# Proportion of Cysteine

## Histogram

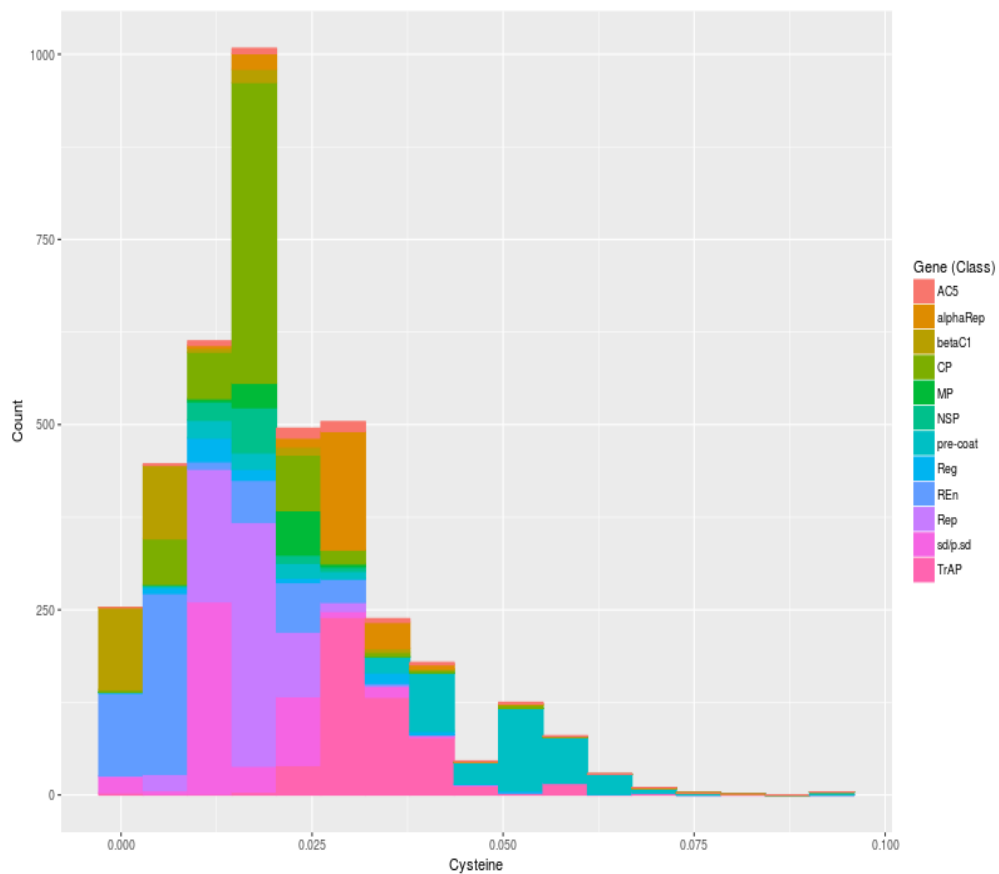

## Density

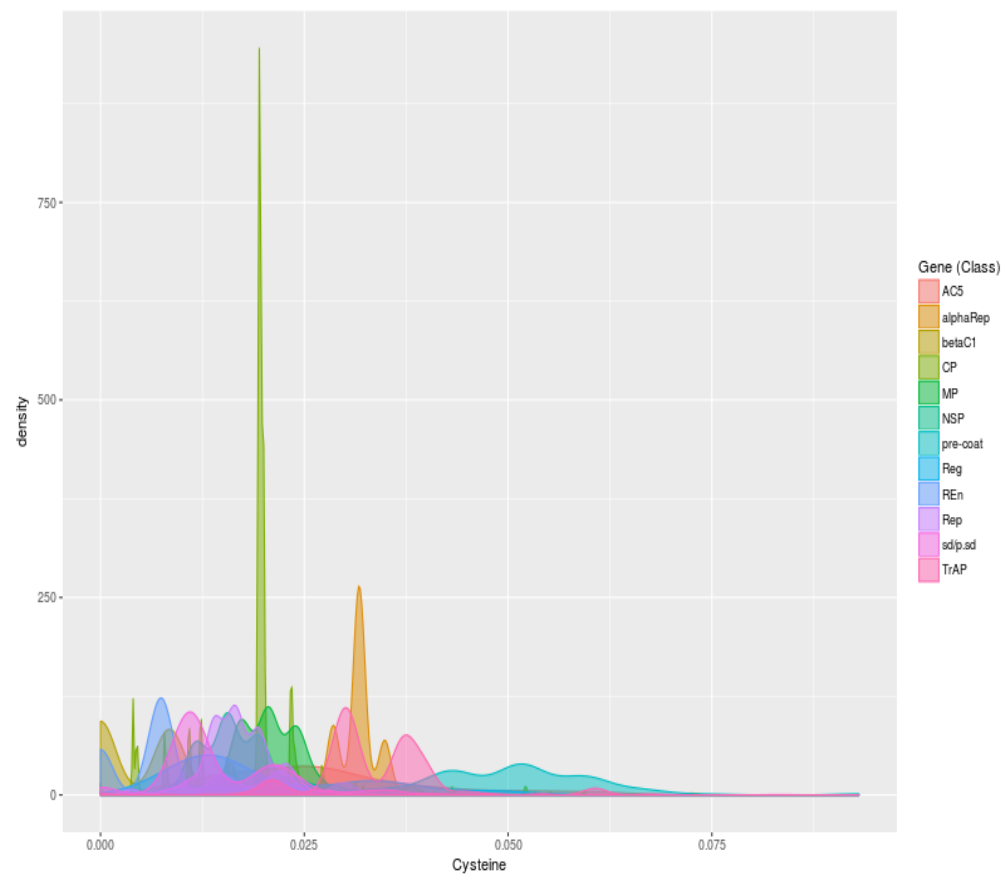

Boxplots

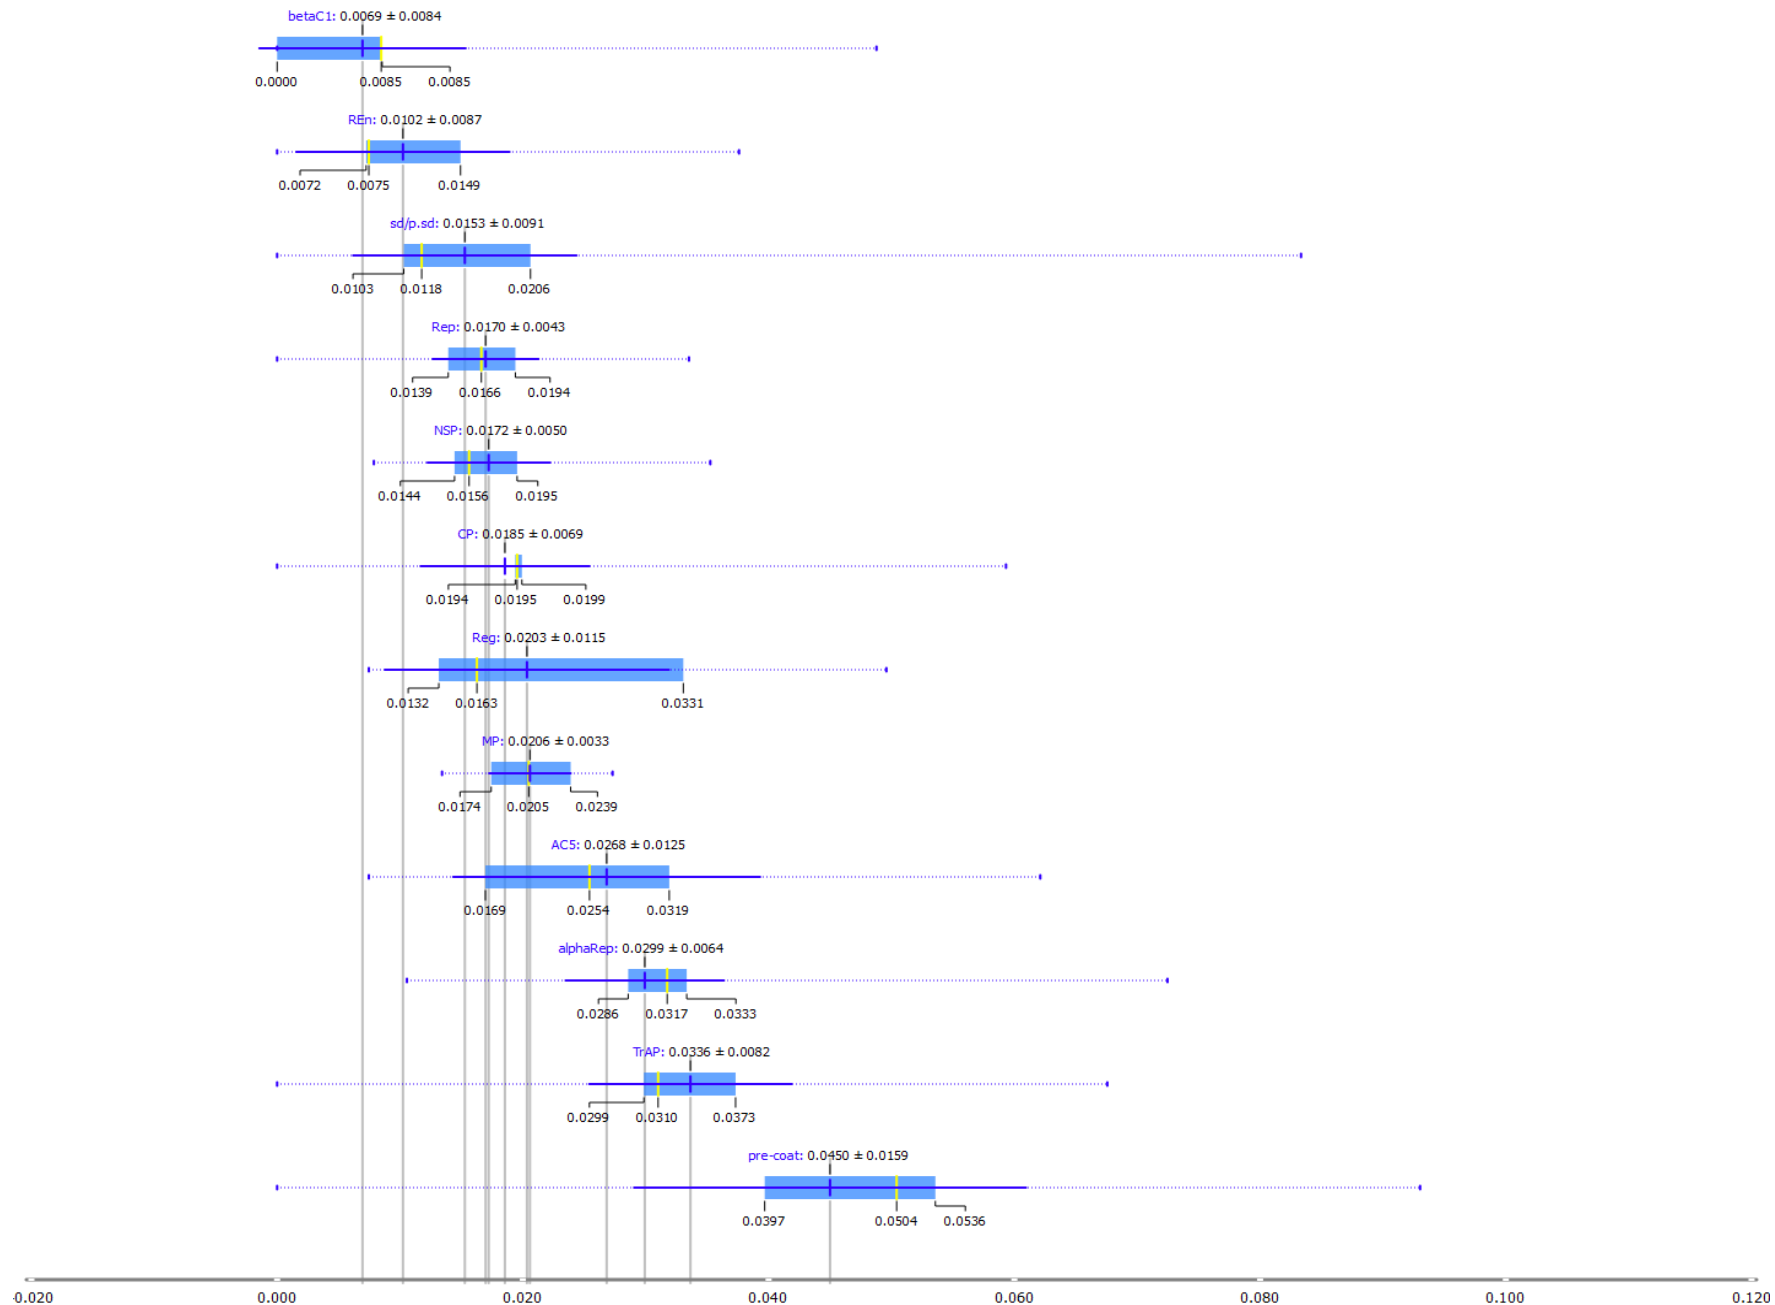



## Proportion of Glutamic Acid

Histogram

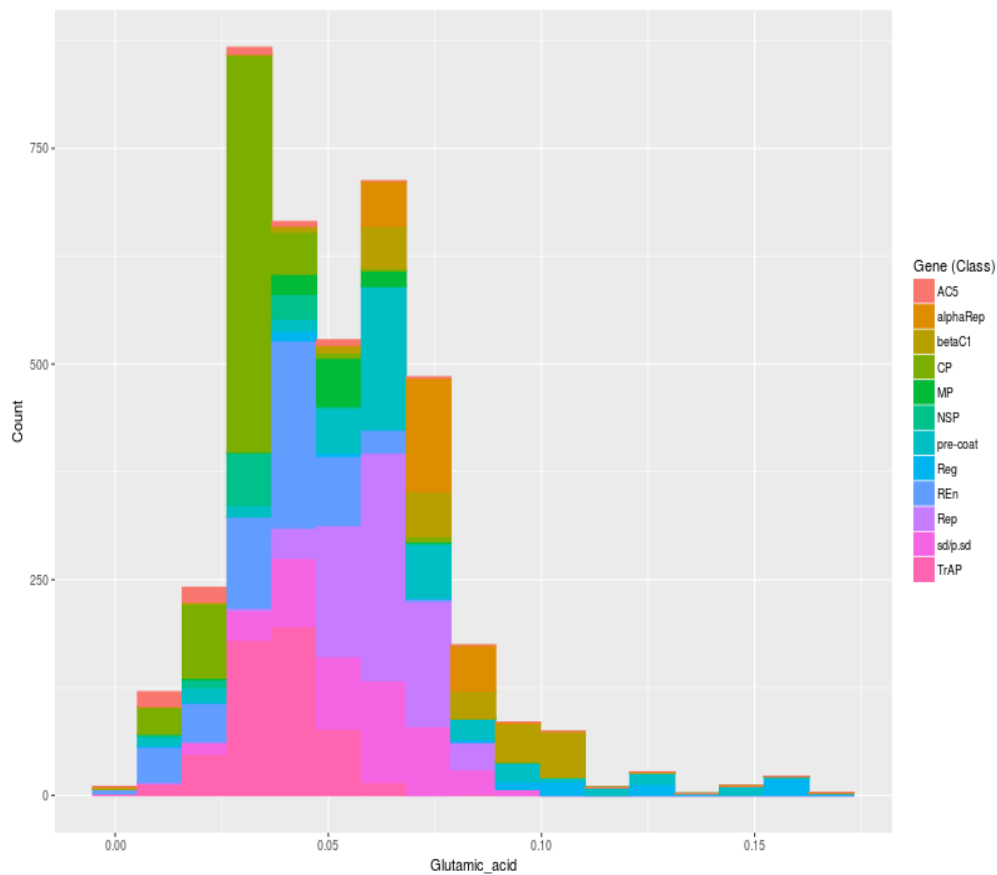

Density

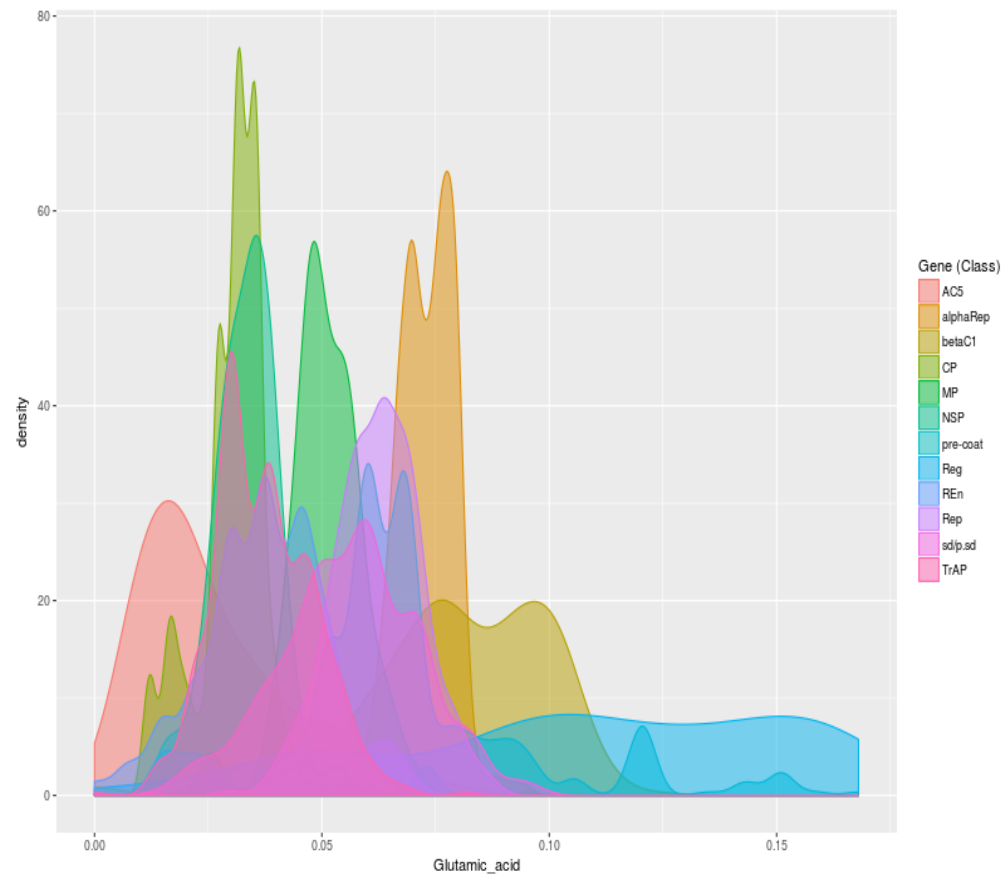

Boxplots

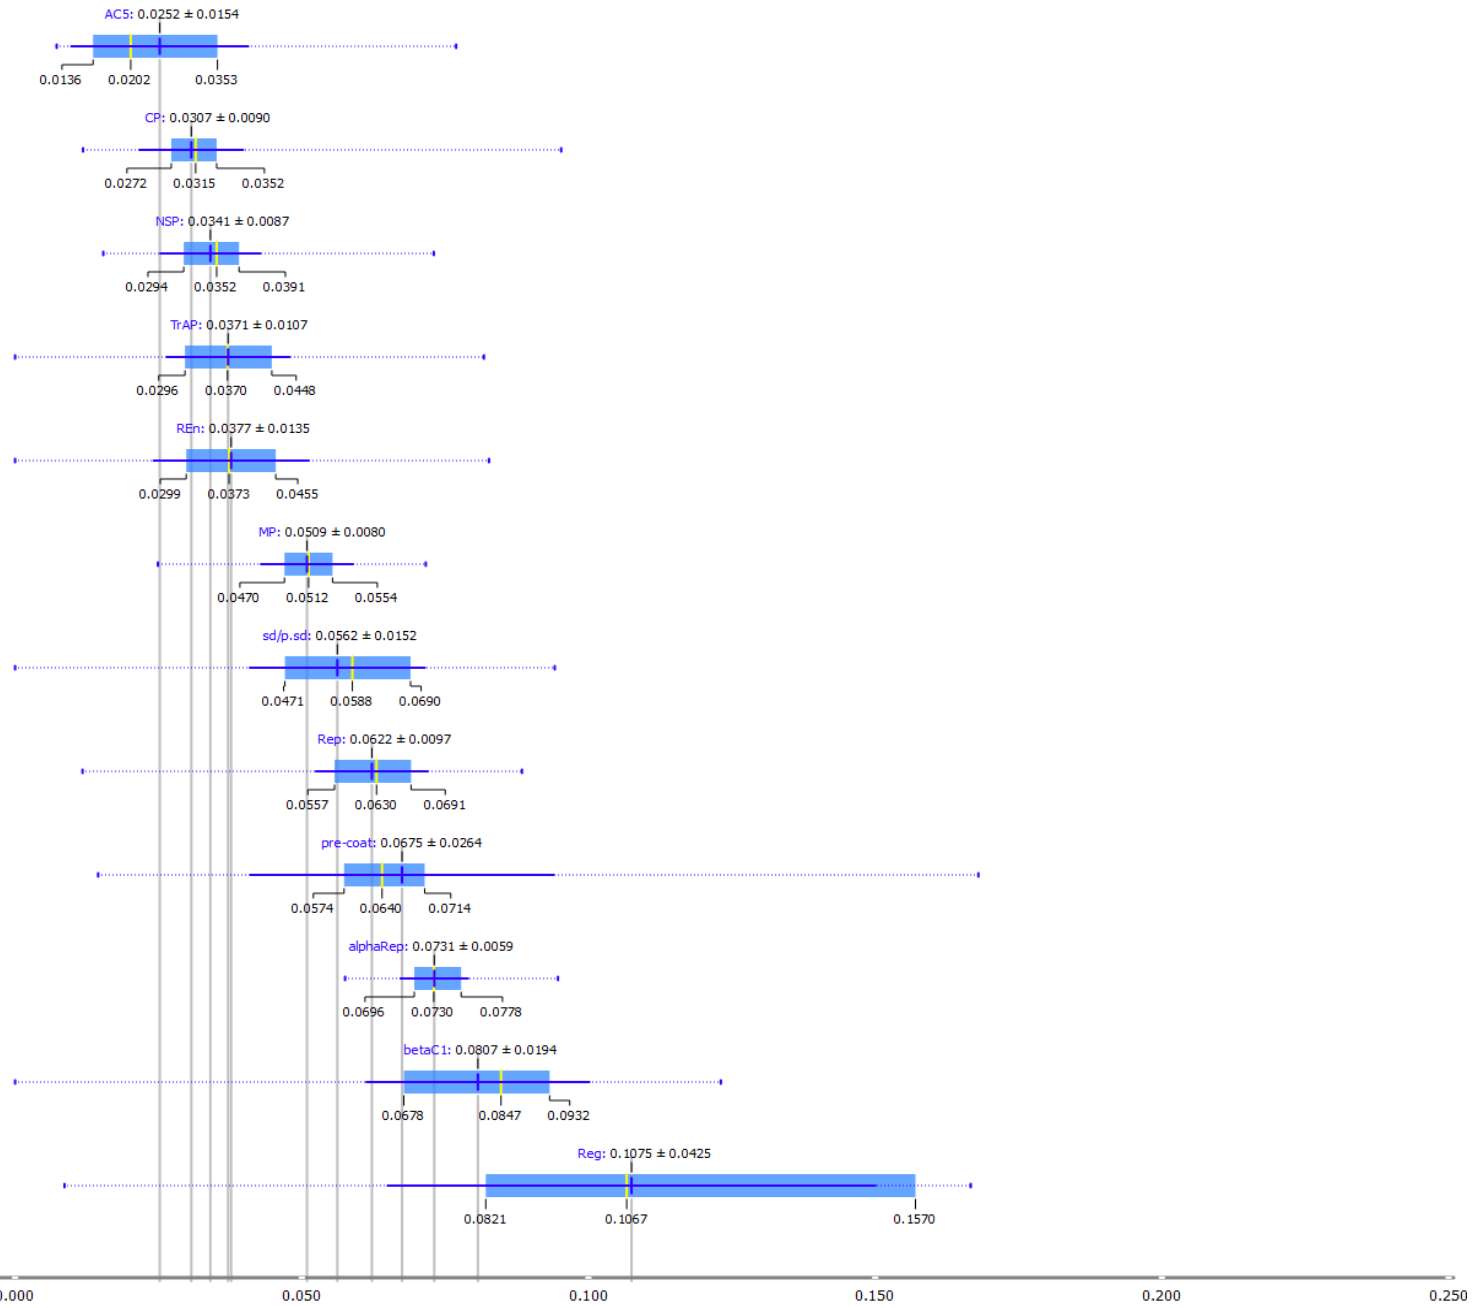

## Proportion of Glutamine

Histogram

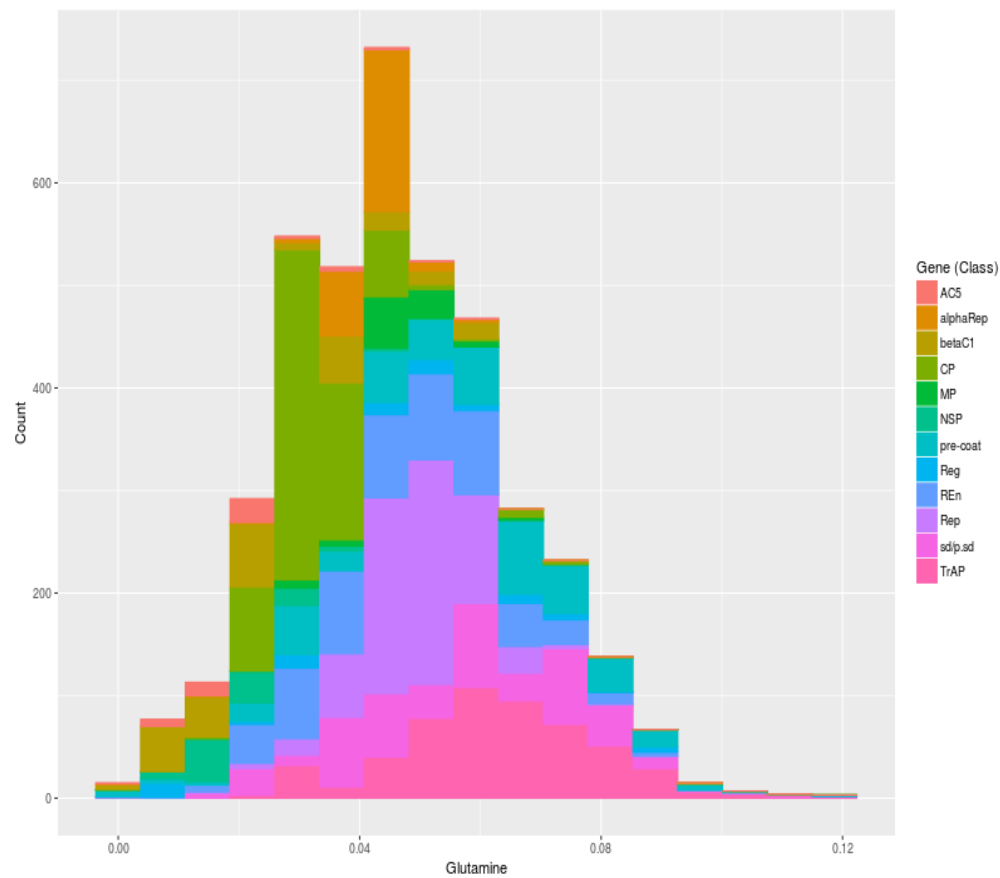

Density

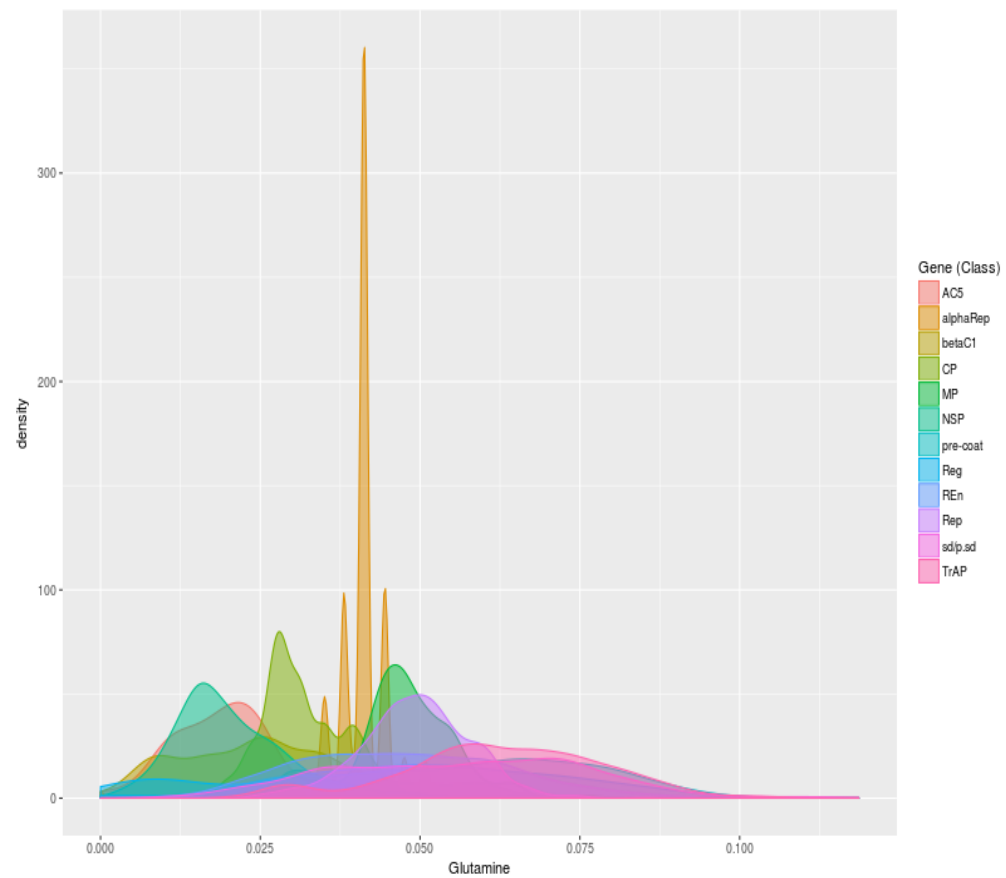

Boxplots

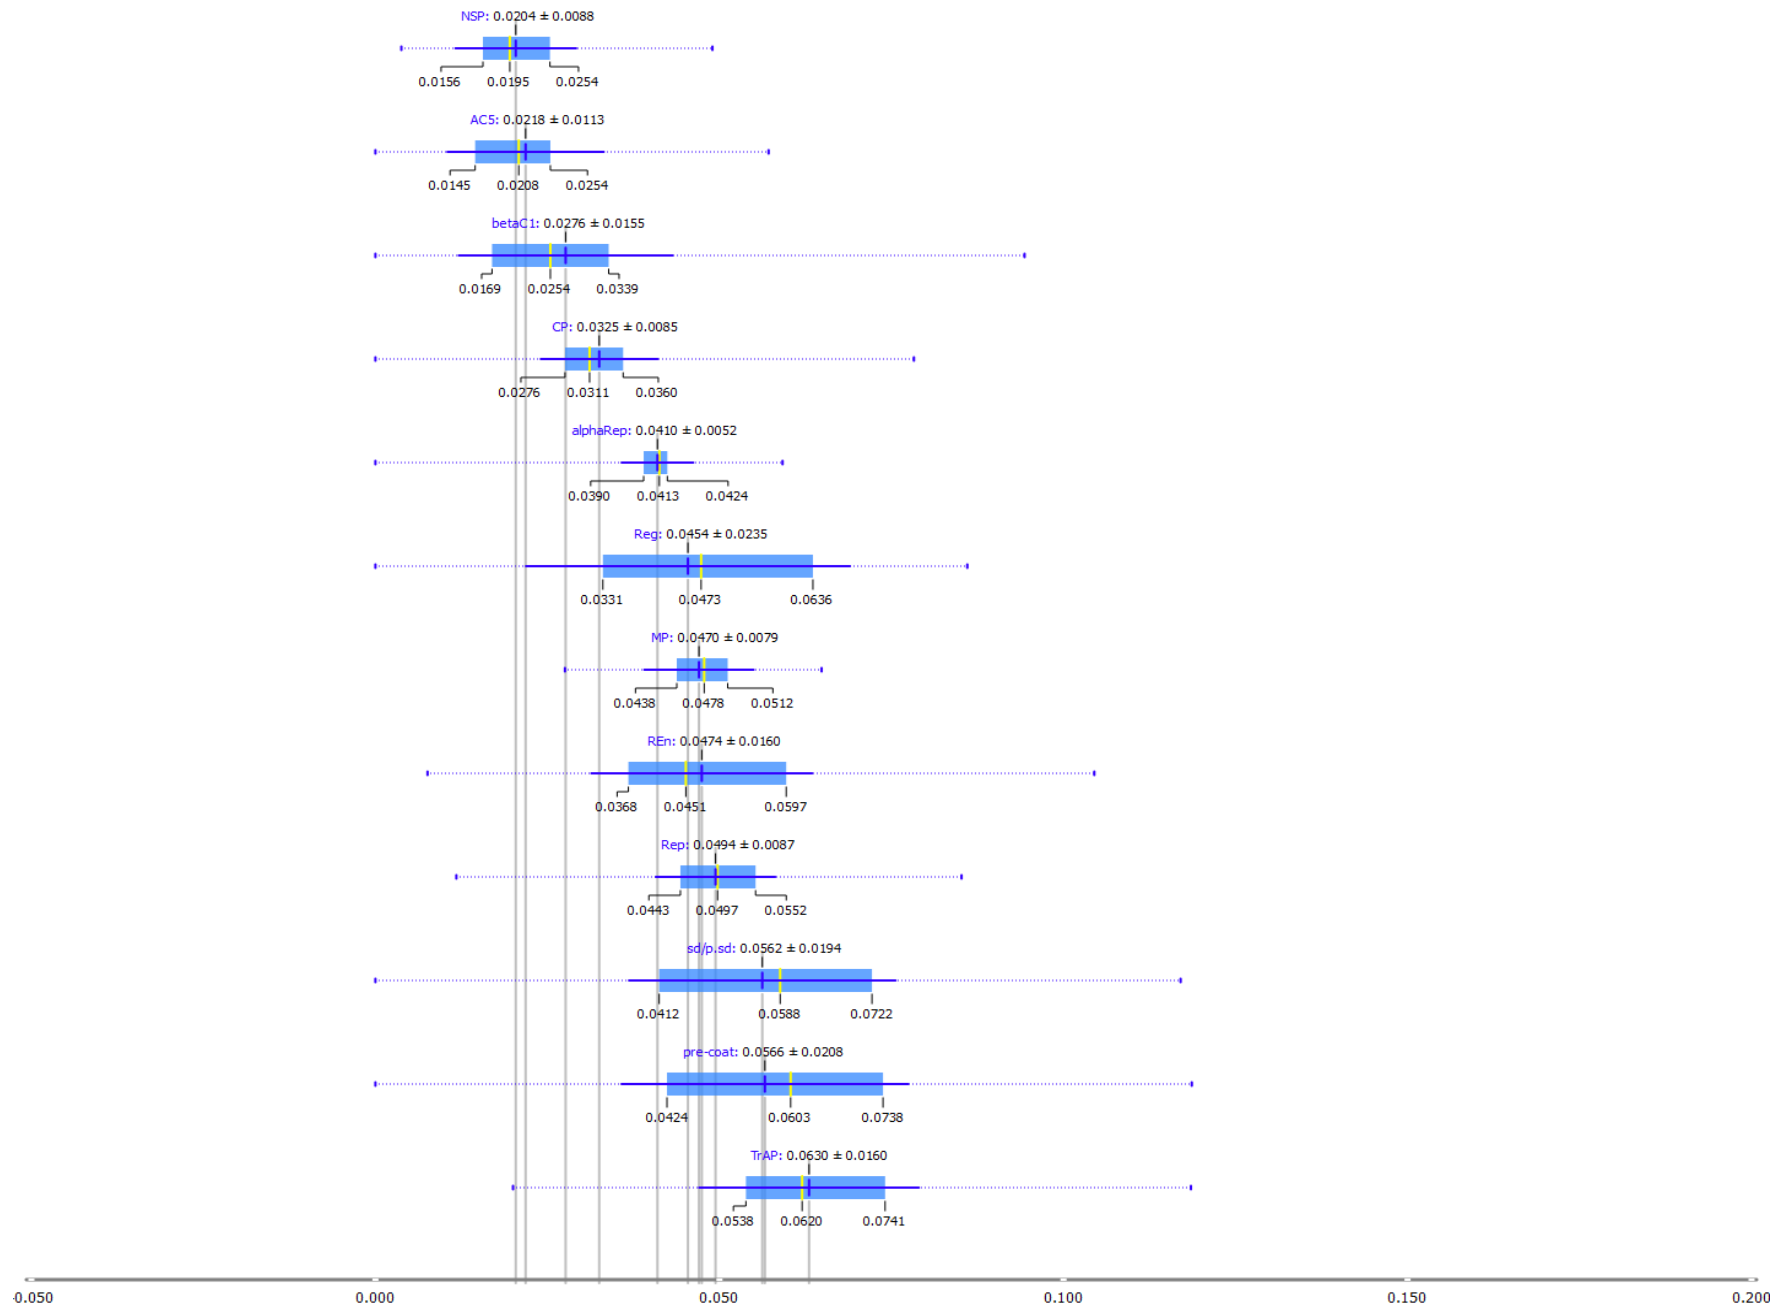

# Proportion of Glycine

Histogram

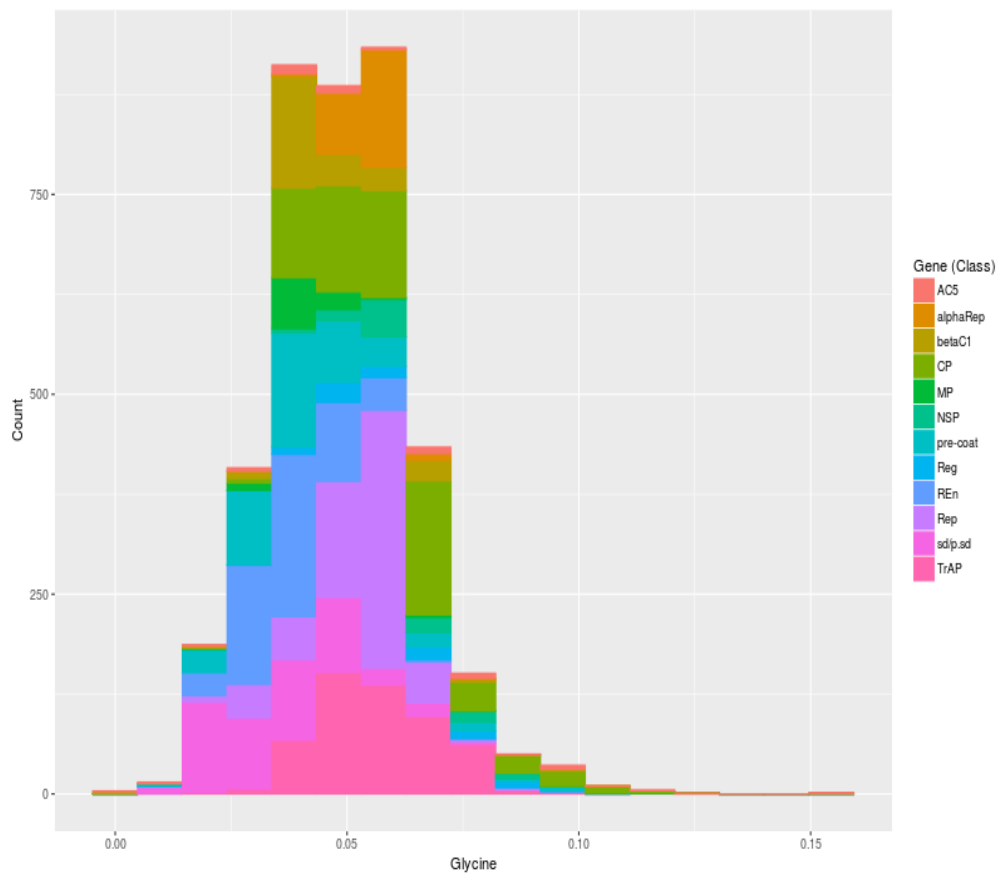

Density

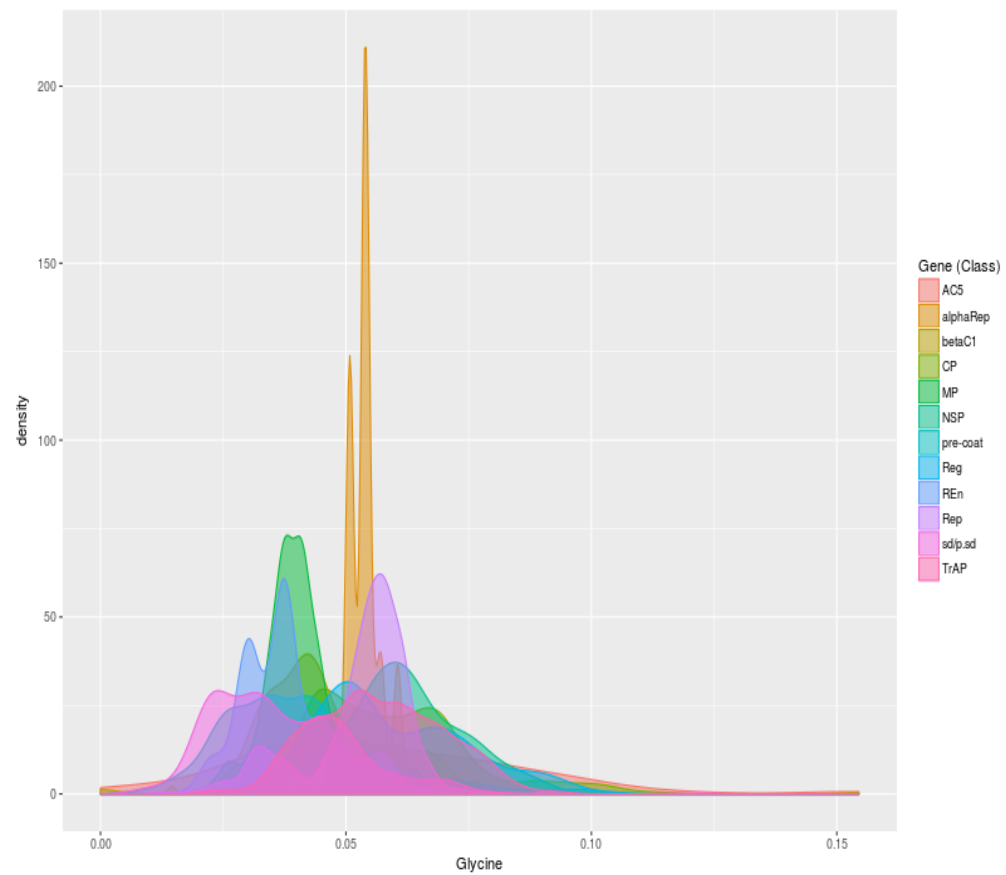

Boxplots

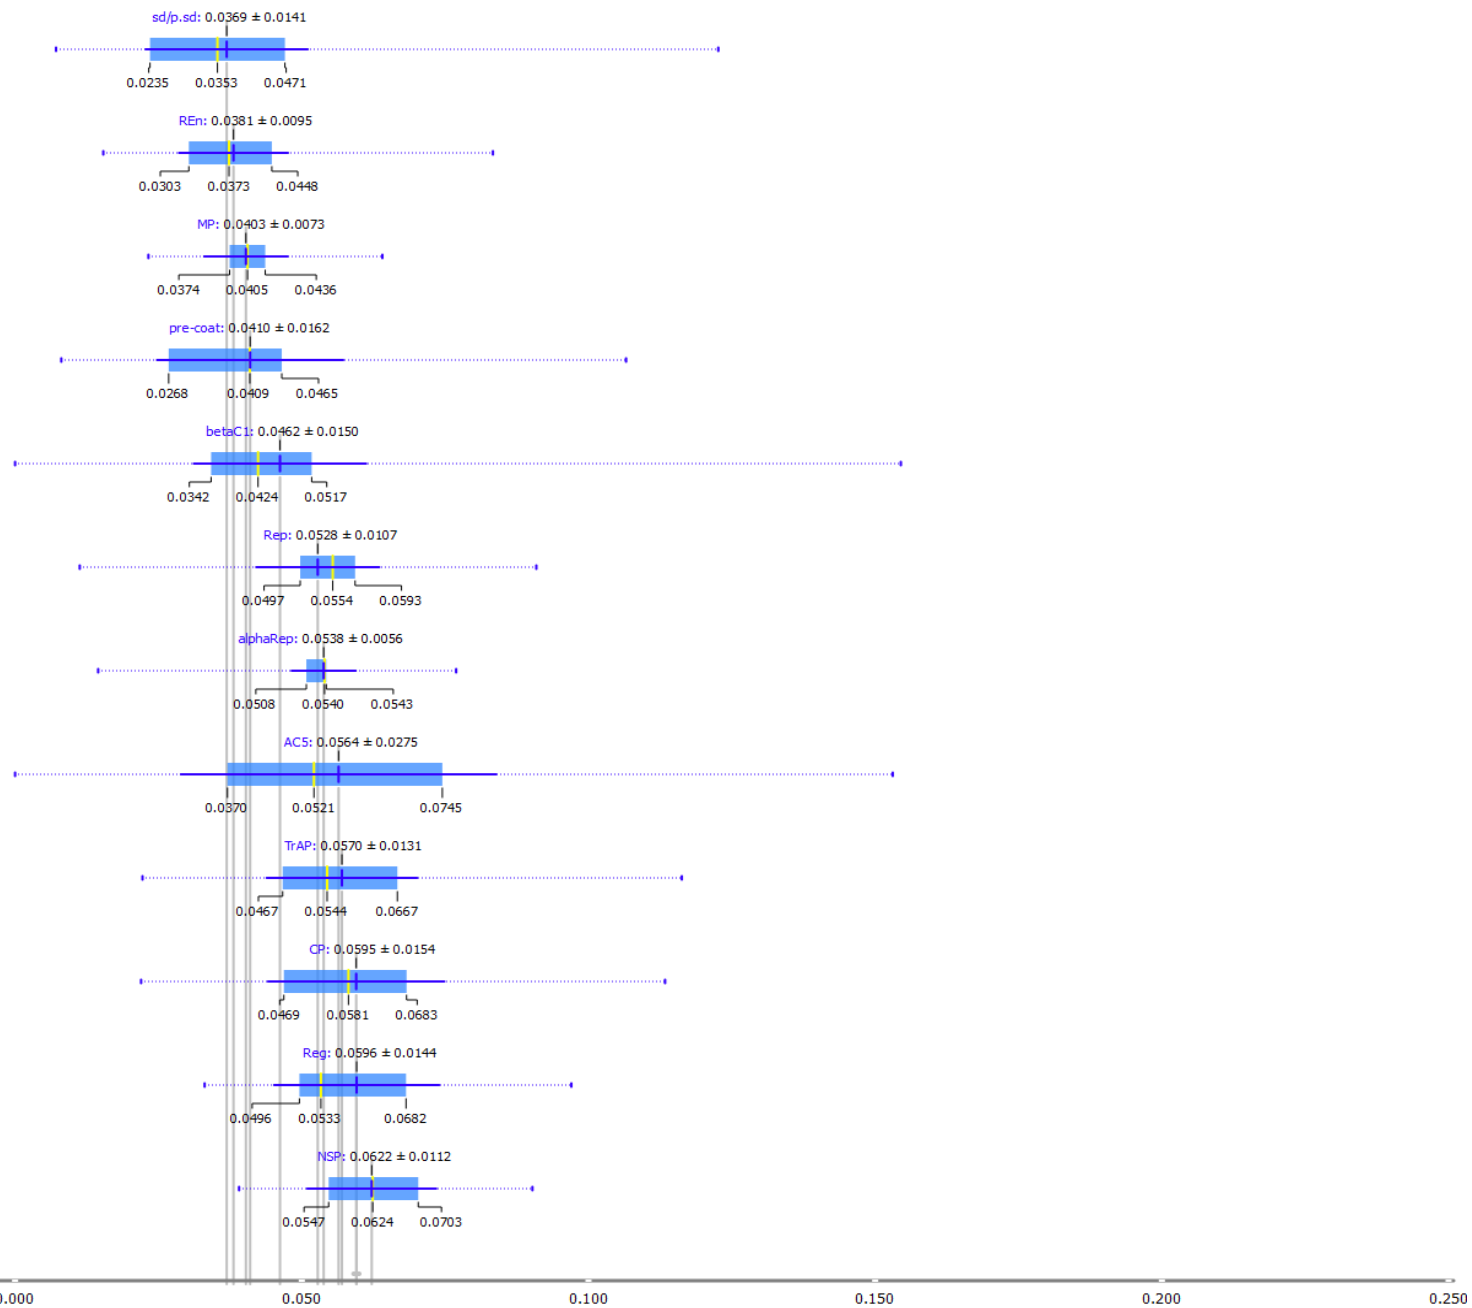

## Proportion of Histidine

Histogram

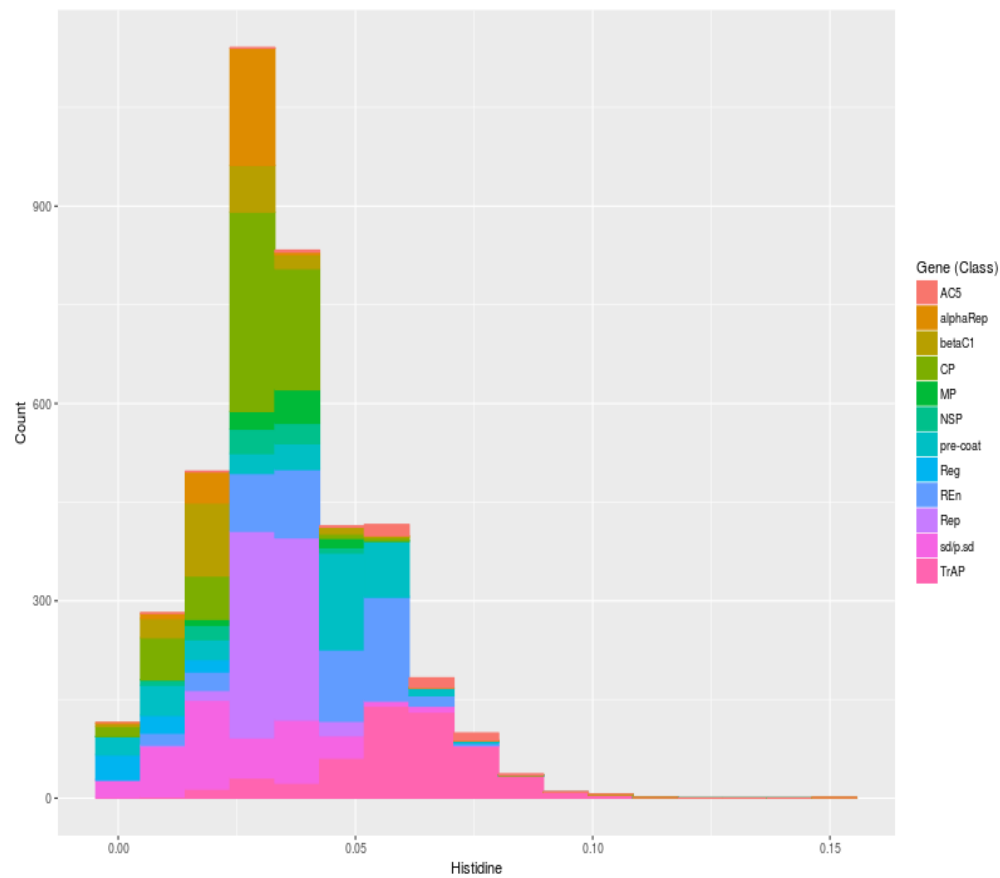

Density

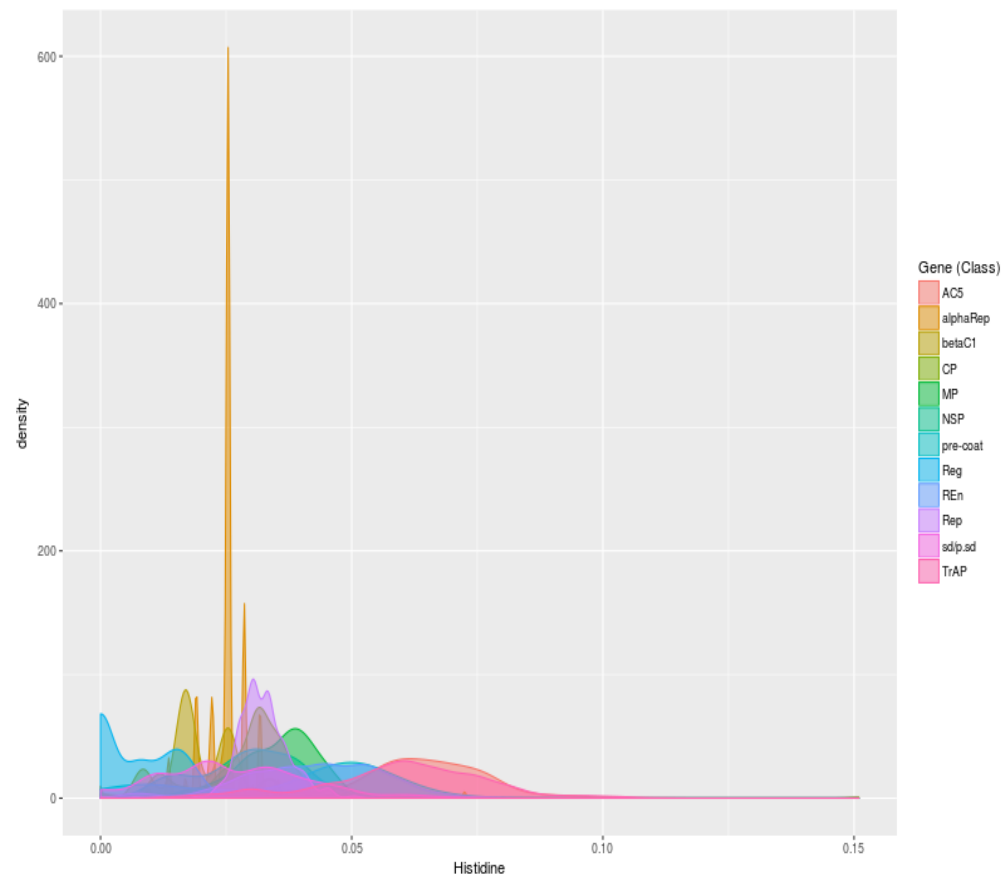

Boxplots

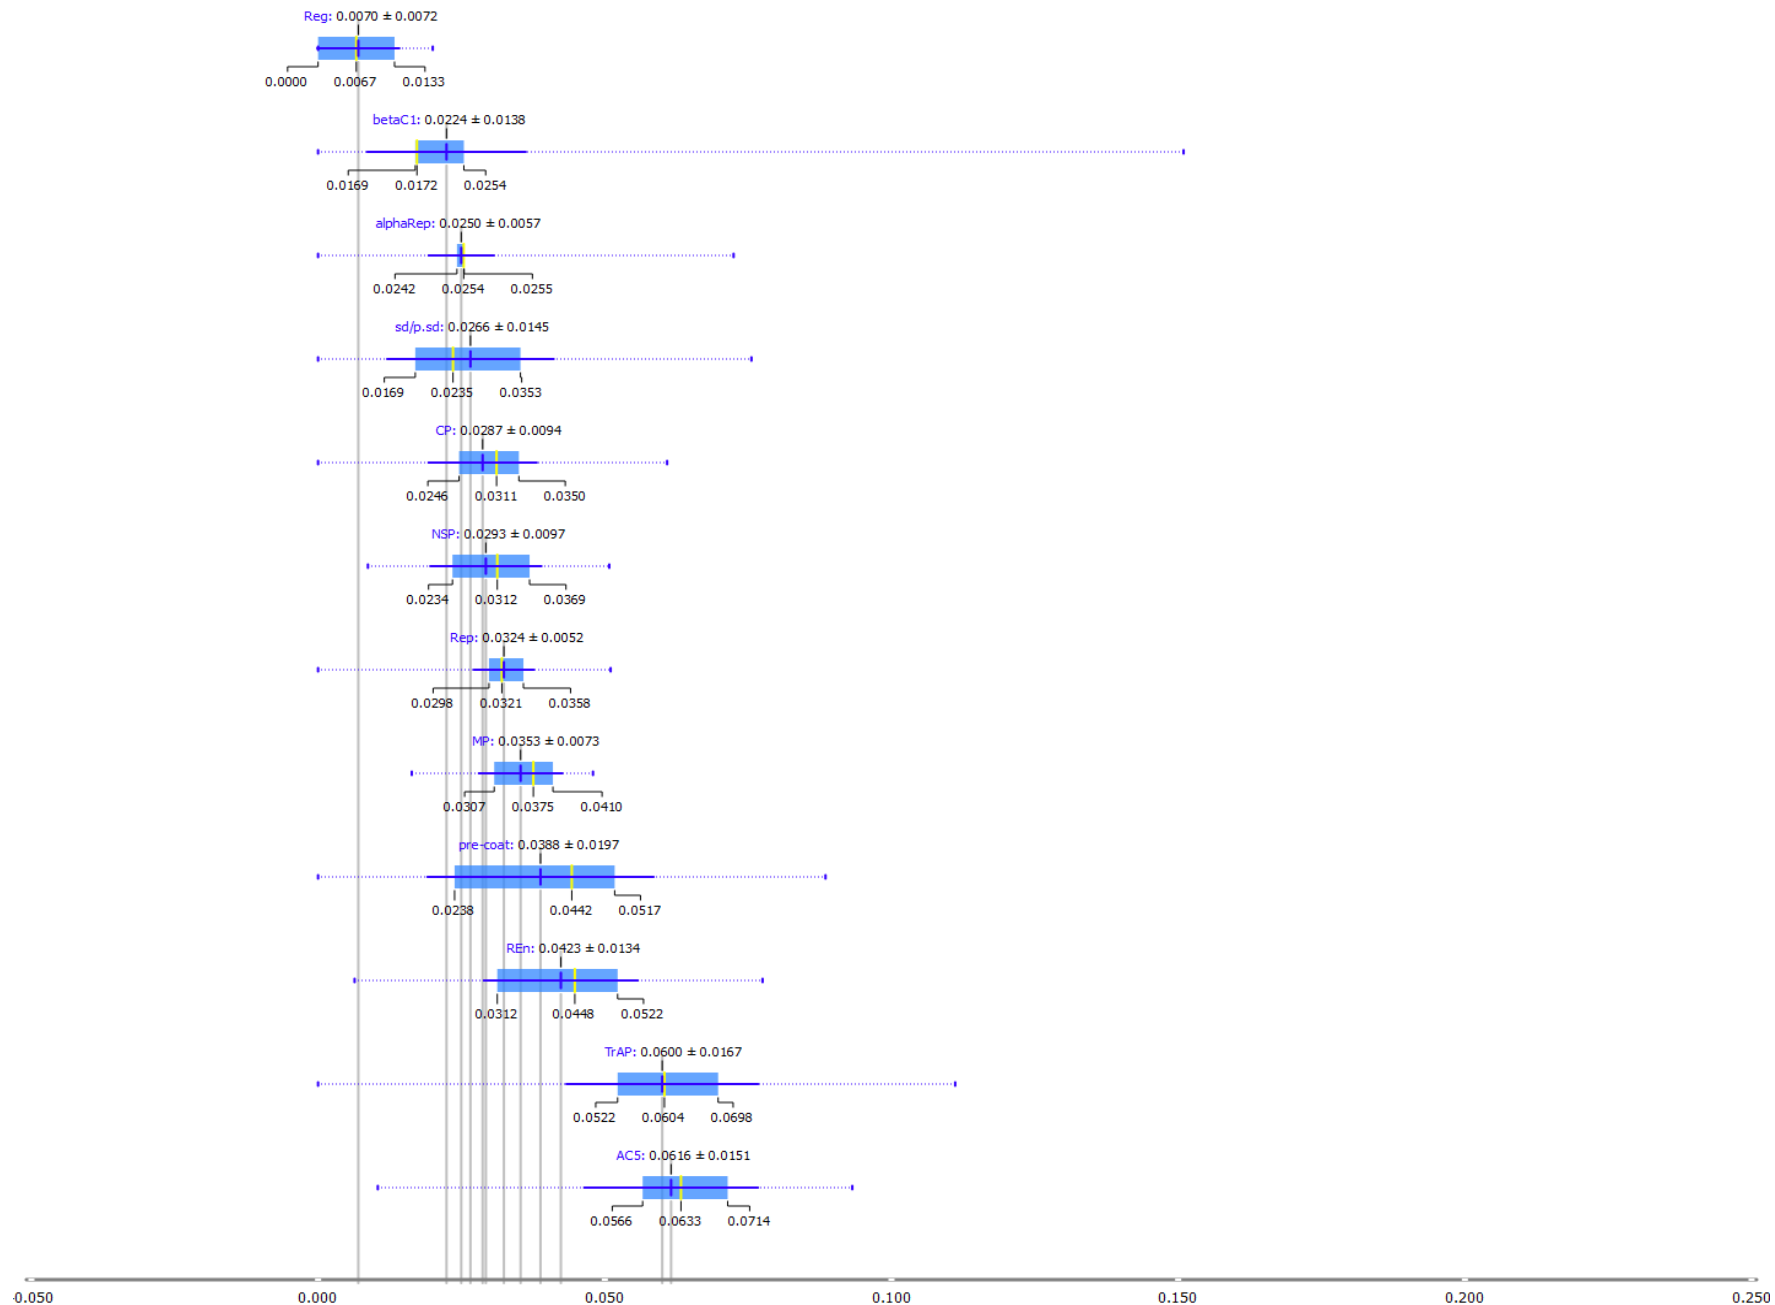



## Proportion of Isoleucine

Histogram

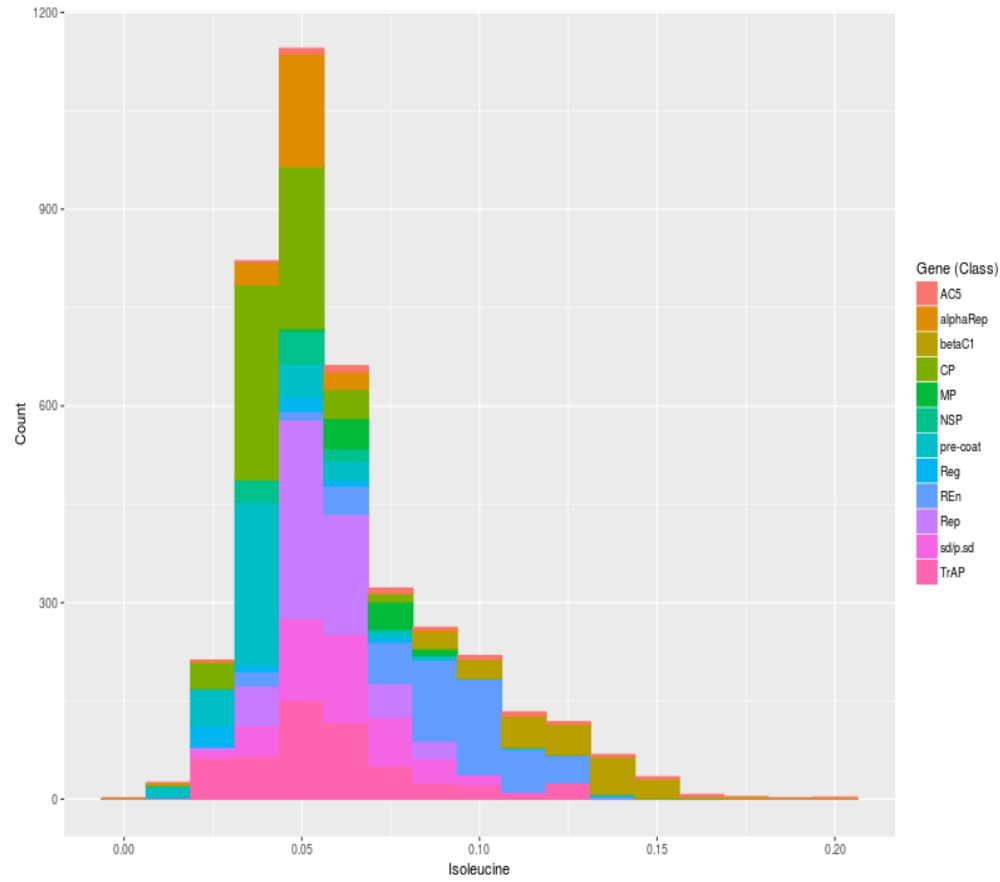

Density

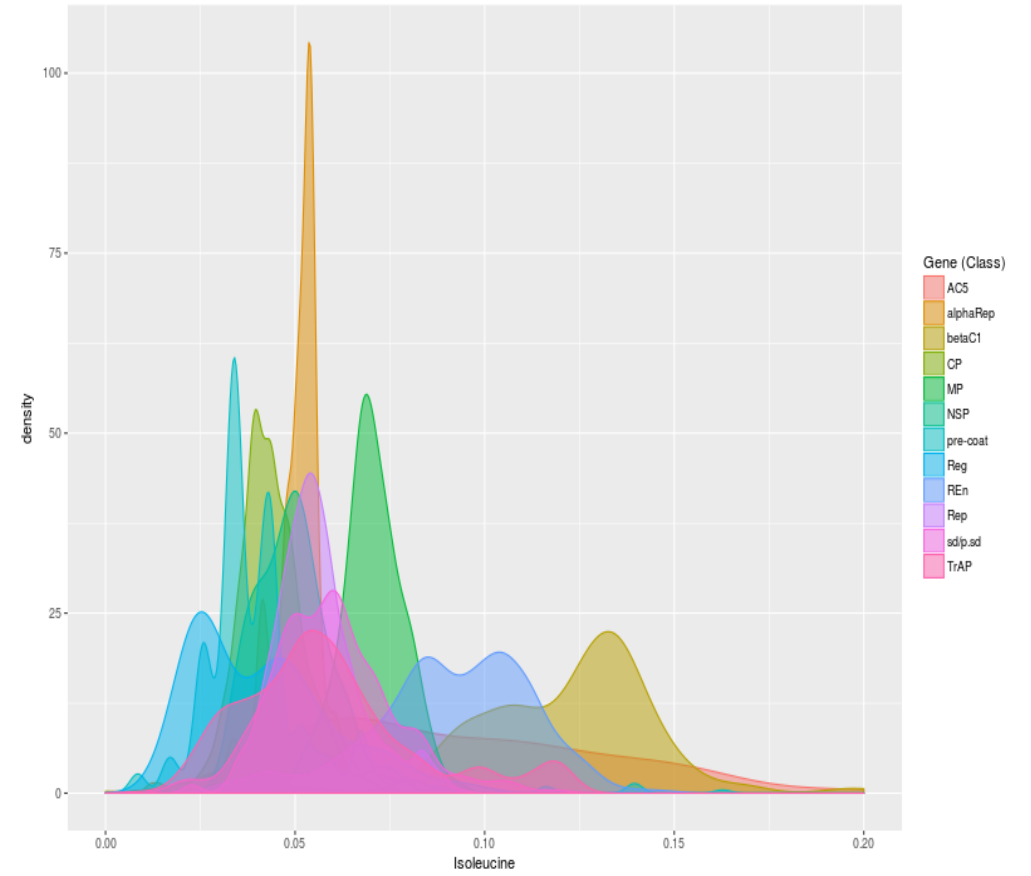

Boxplots

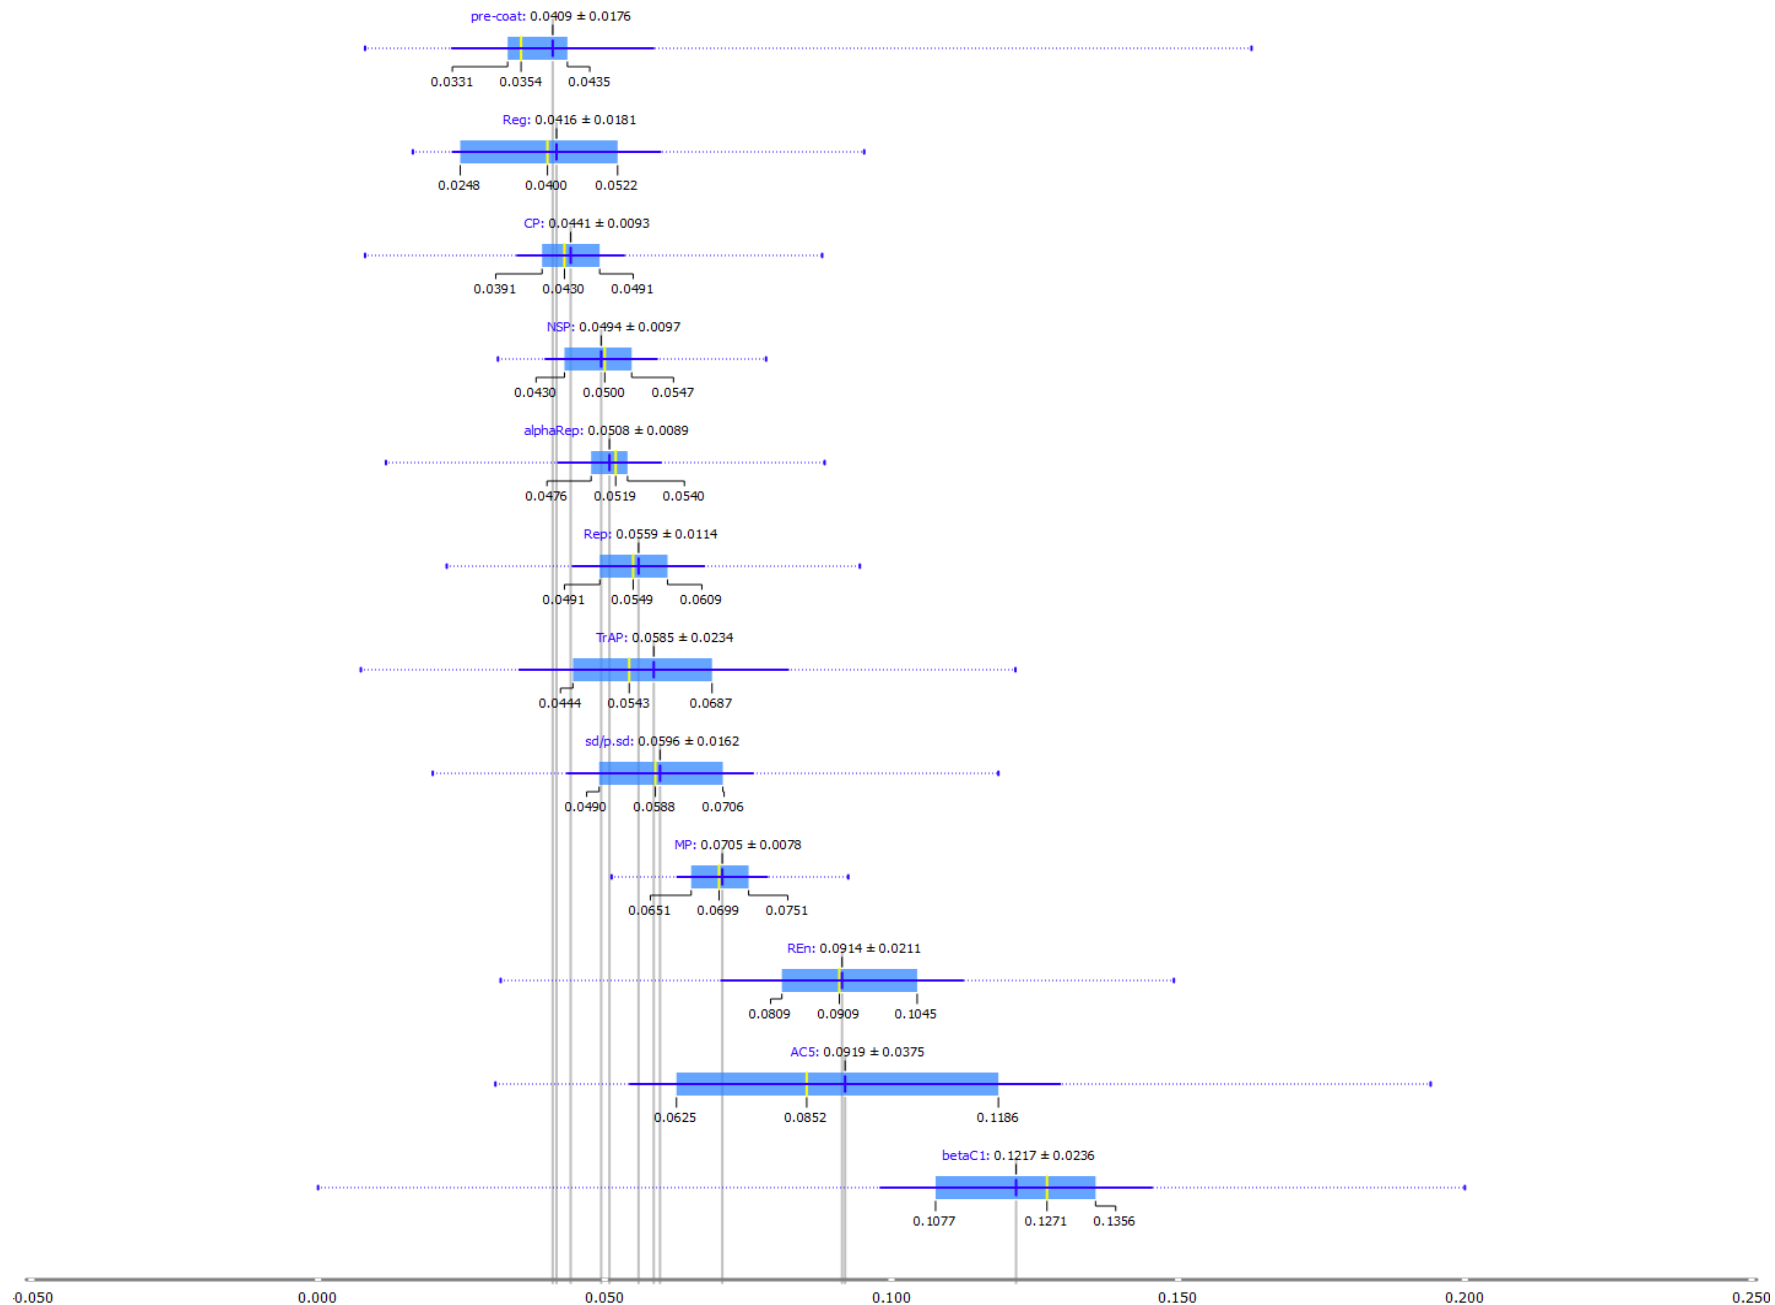

# Length

## Histogram

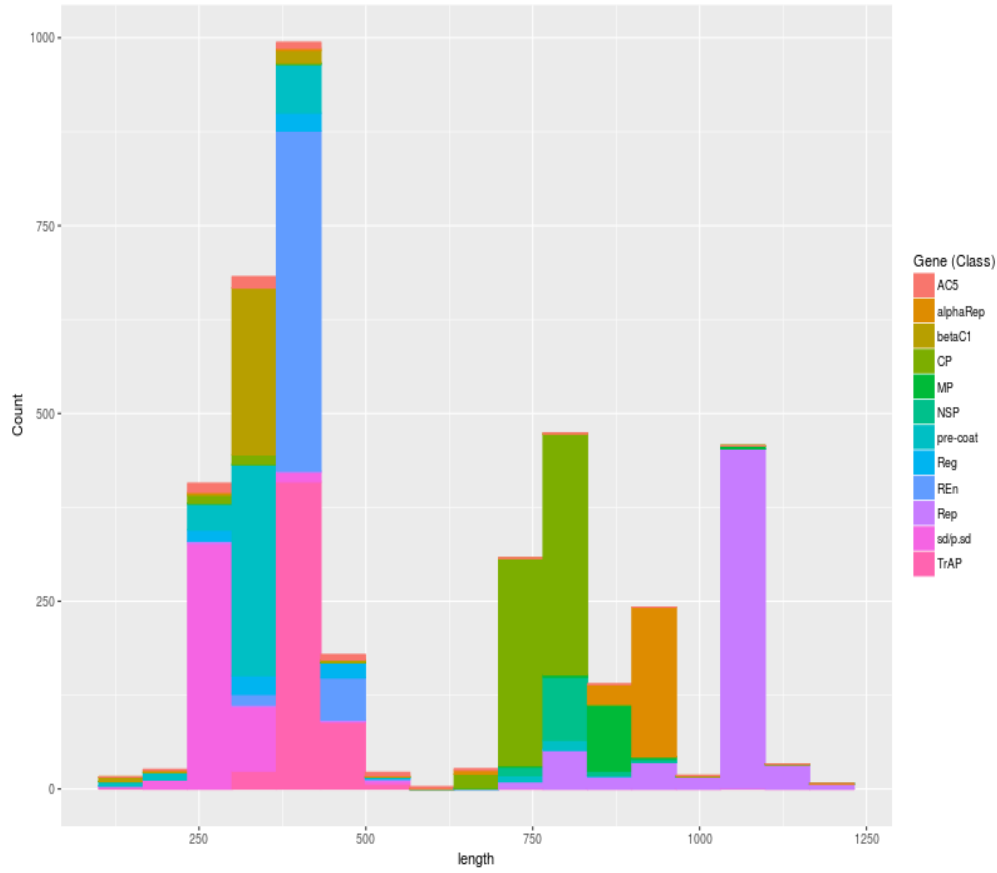

## Density

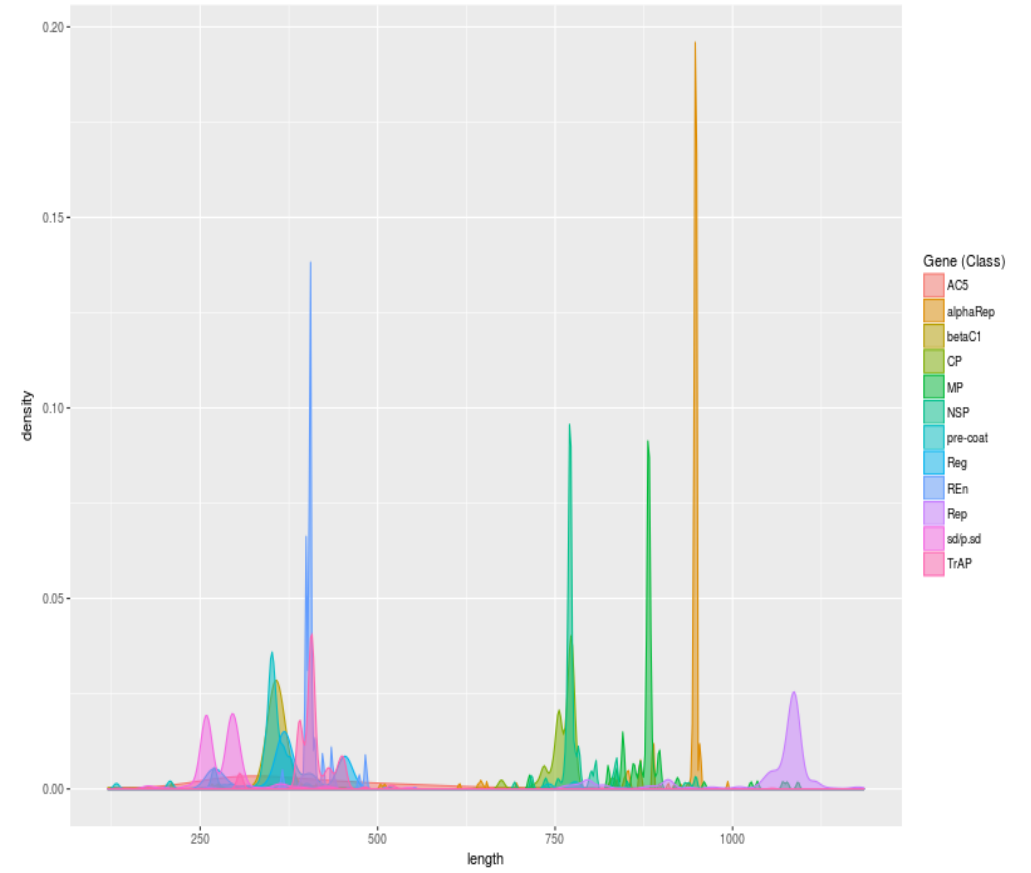

Boxplots

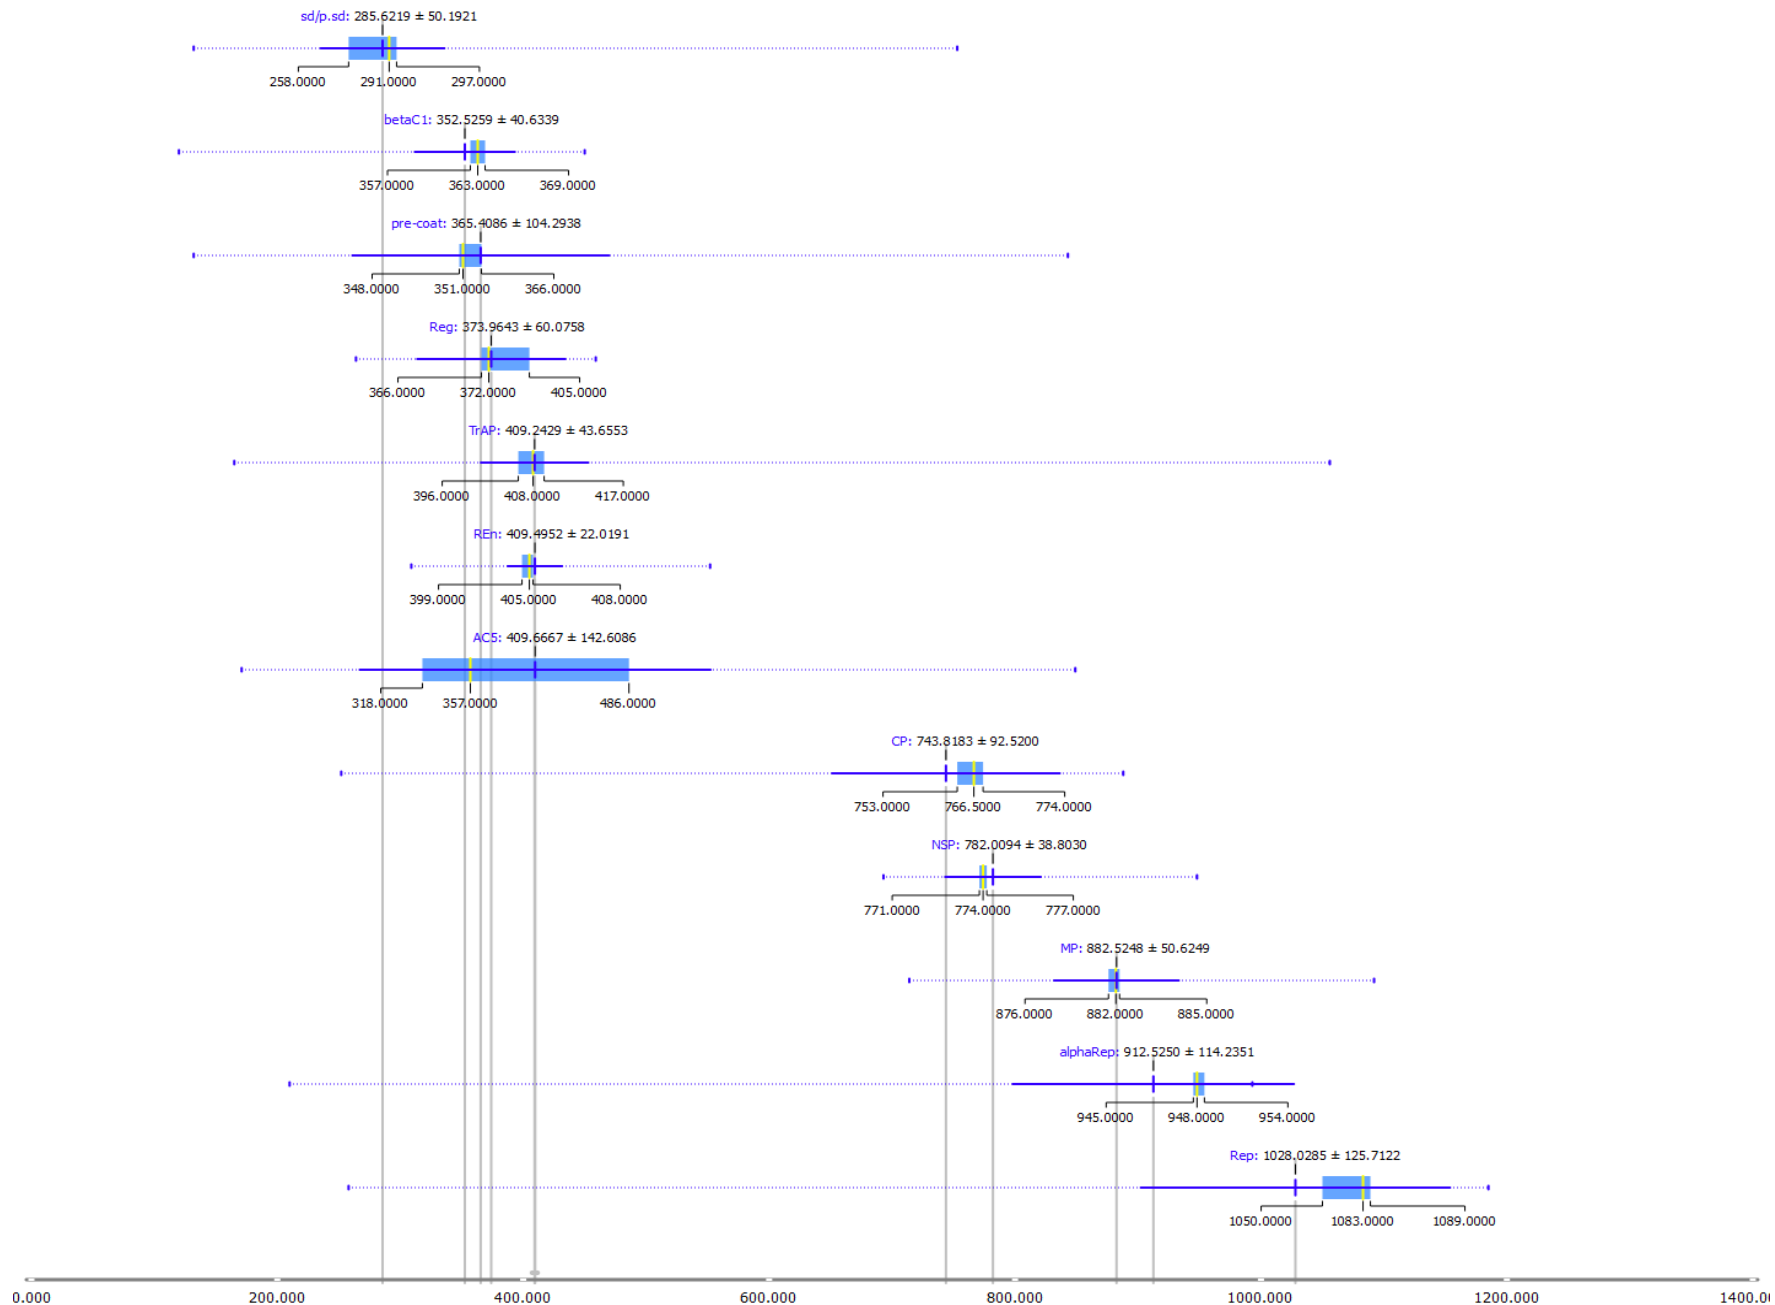

# Sense

## Histogram

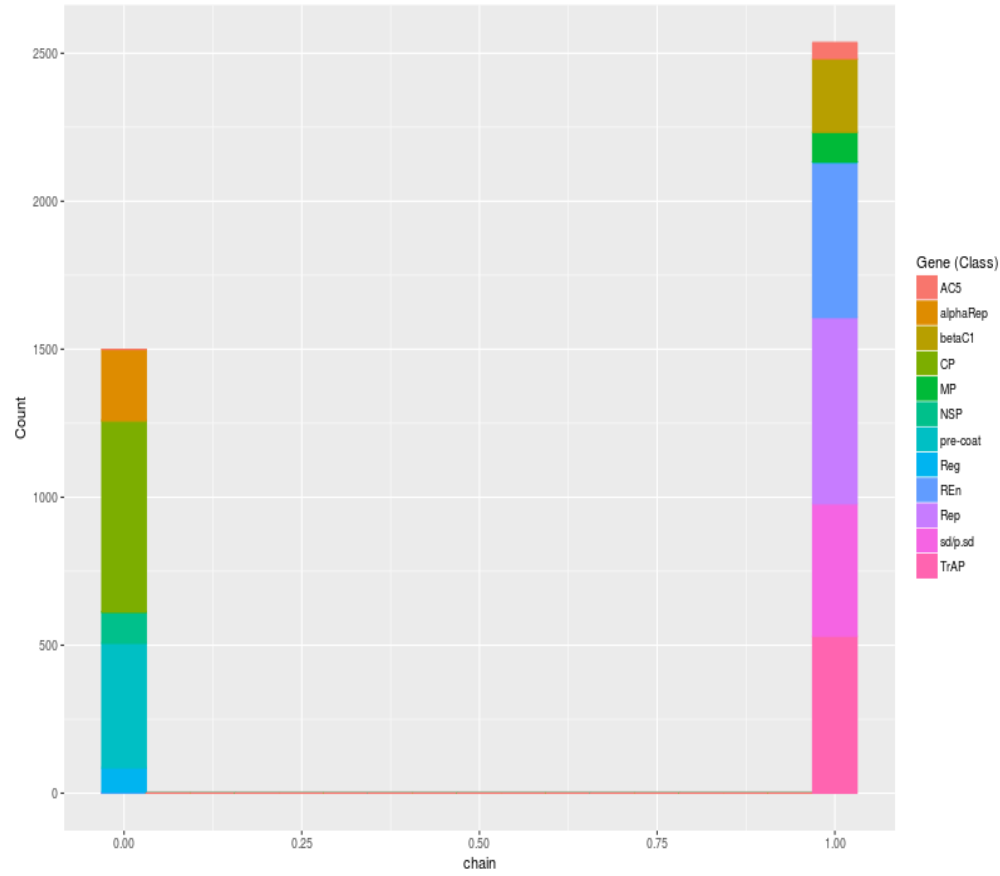

## Density

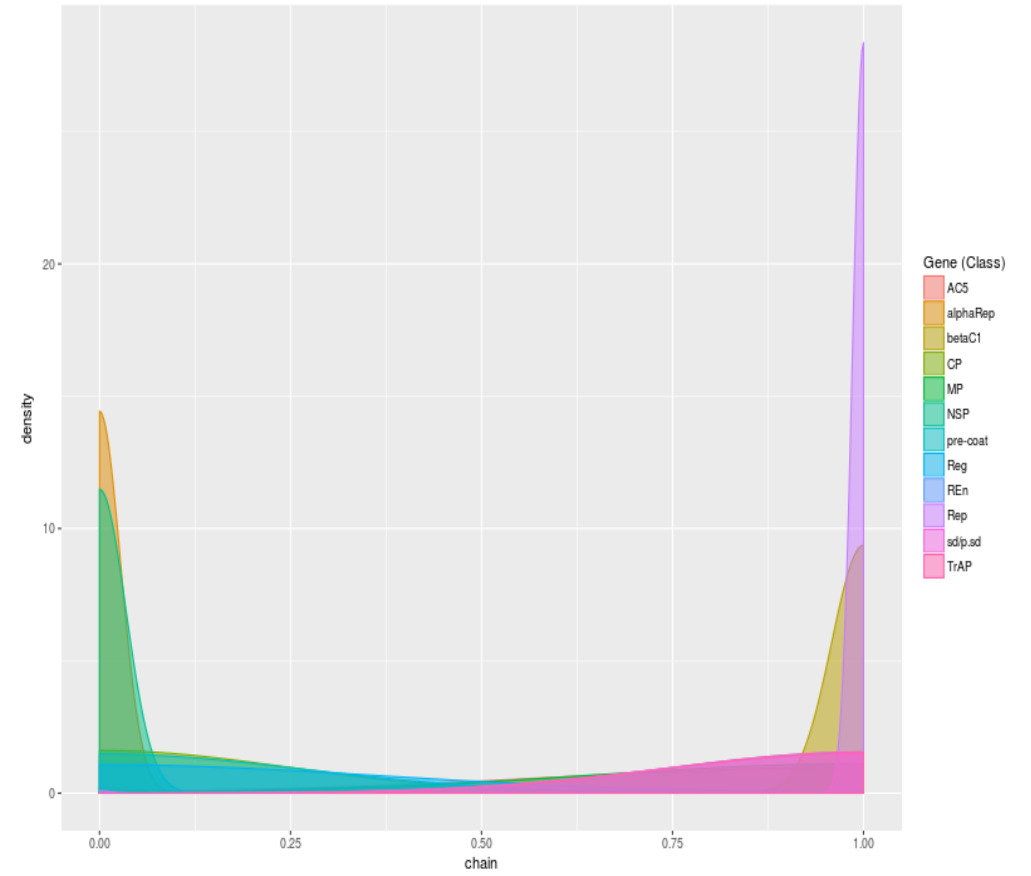

## Proportion of Leucine

Histogram

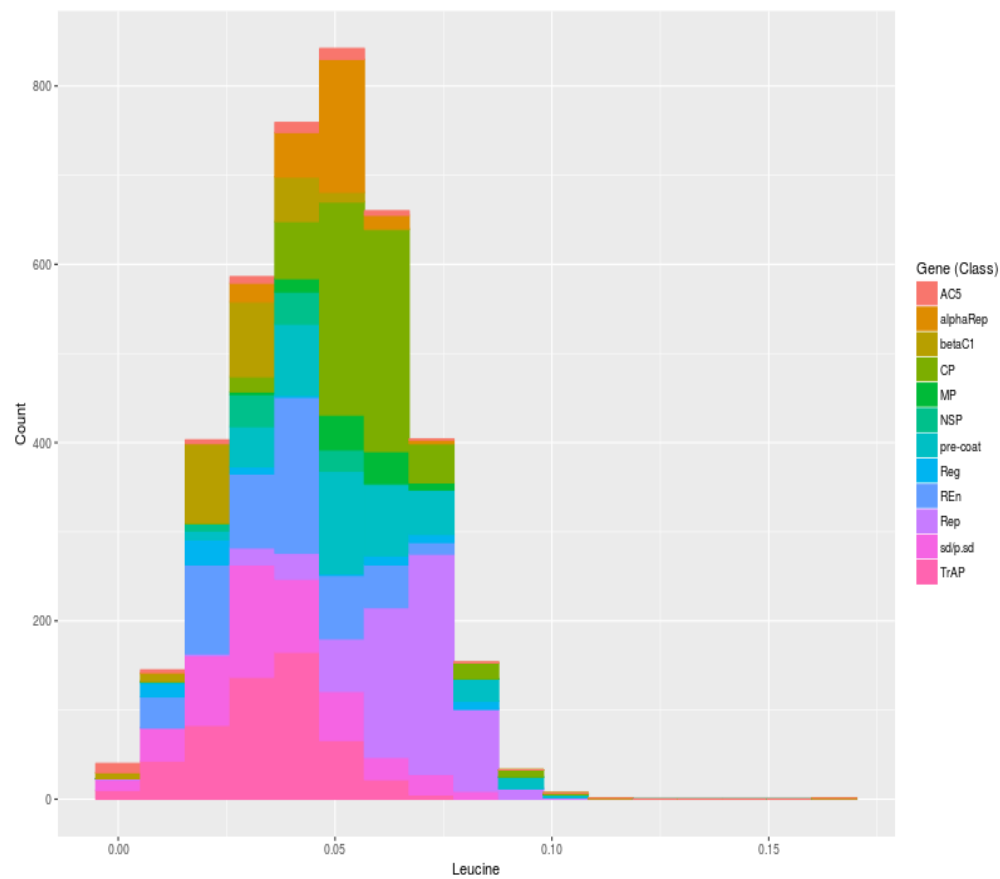

Density

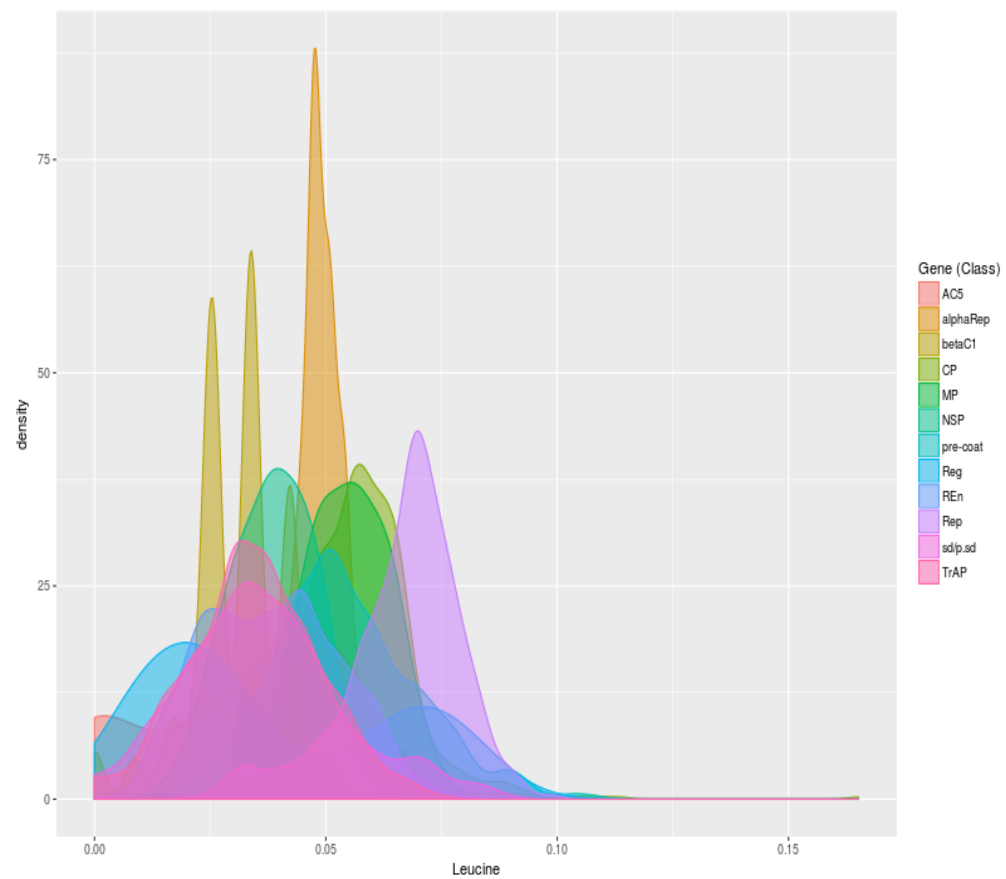

Boxplots



# Proportion of Lysine

## Histogram

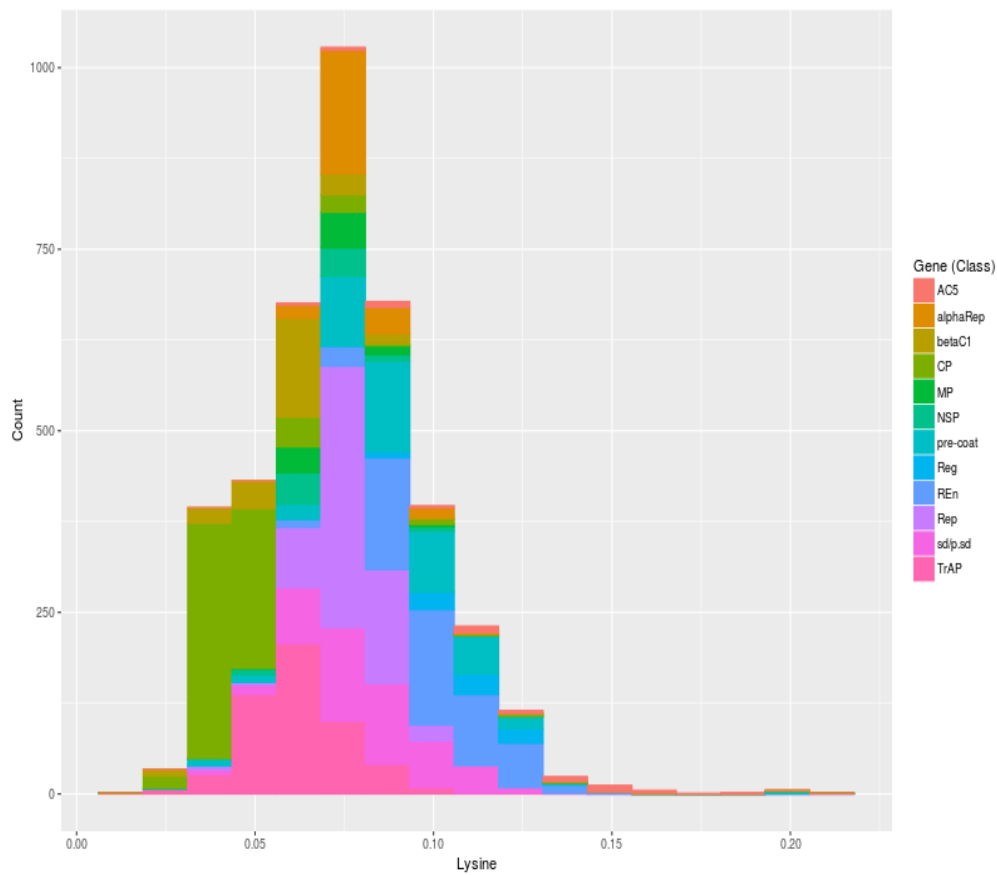

## Density

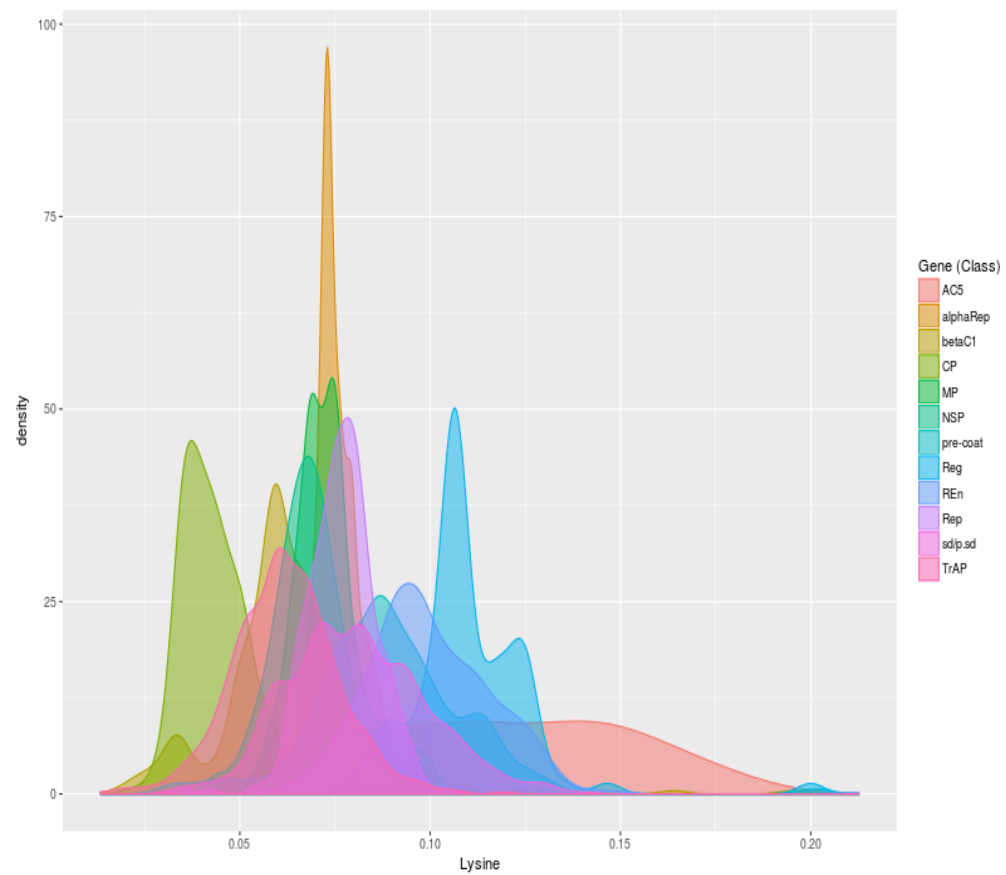



Boxplots

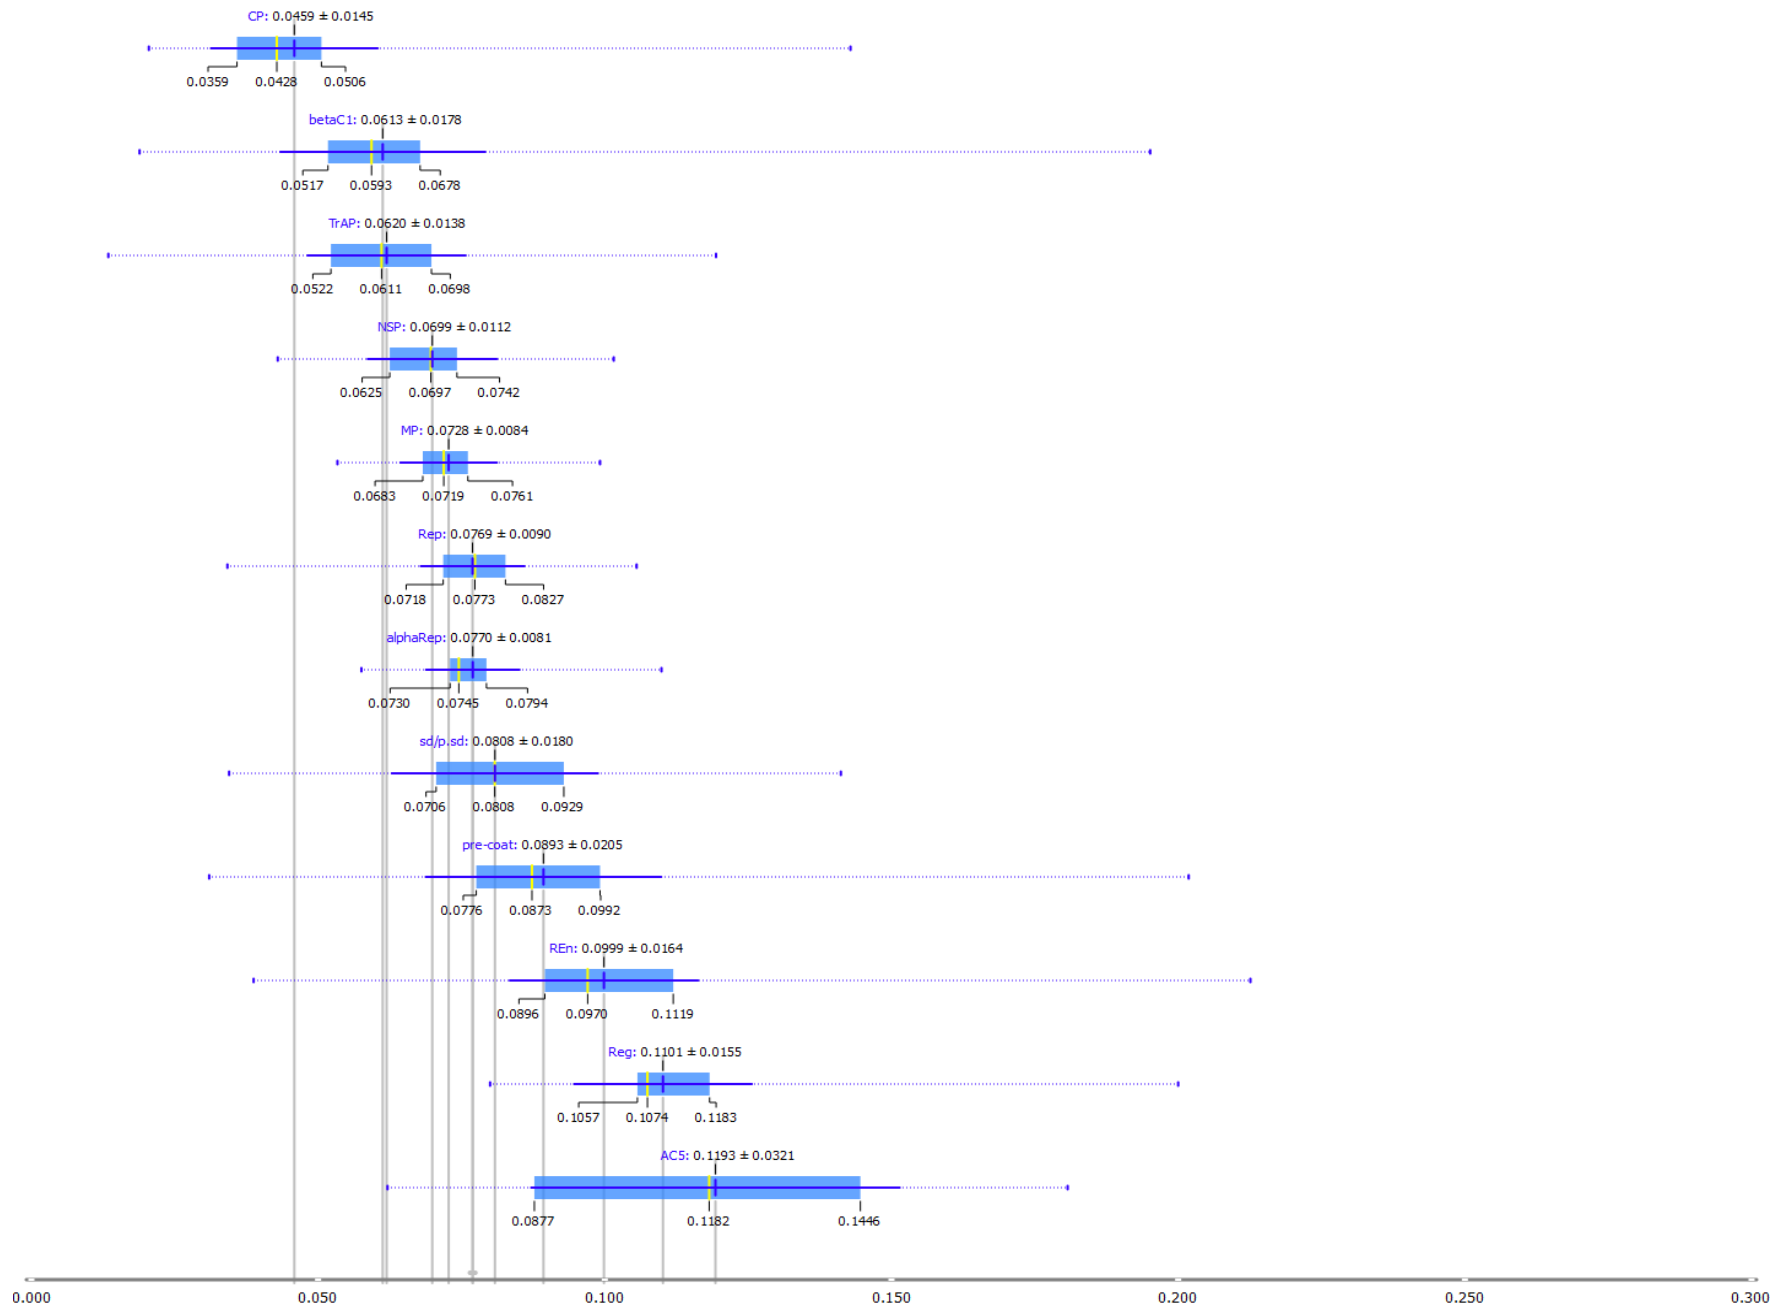

# Proportion of Methionine

Histogram

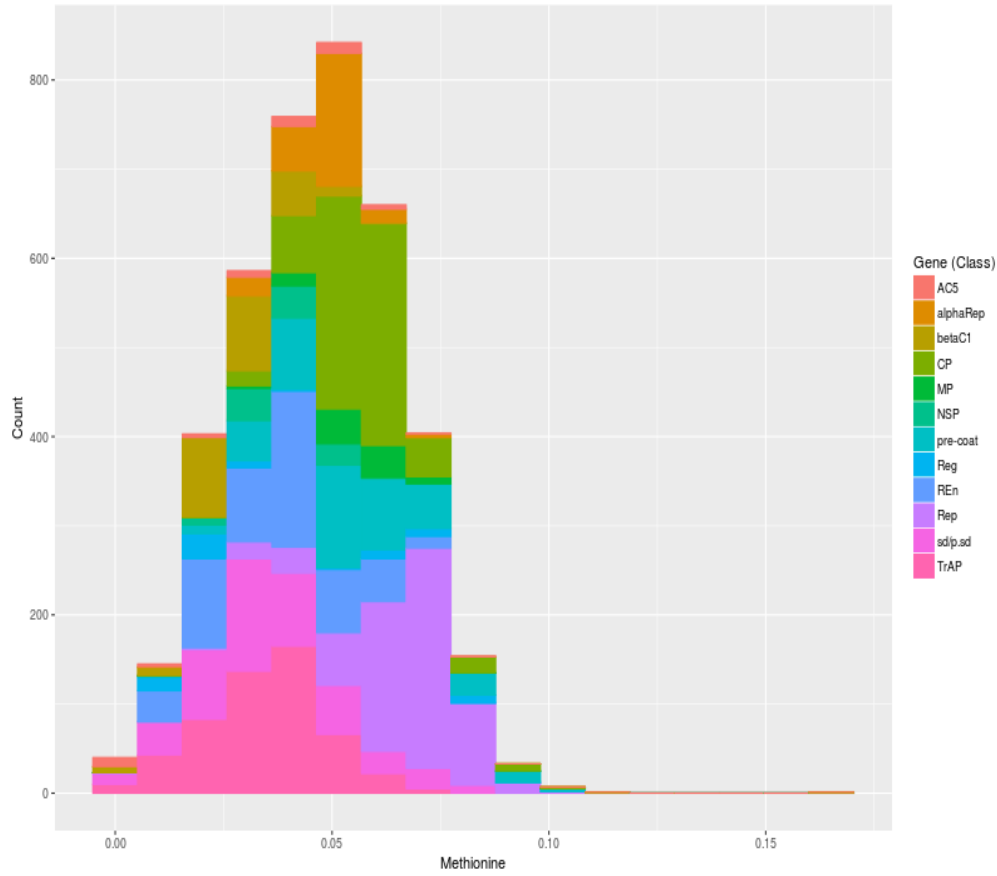

Density

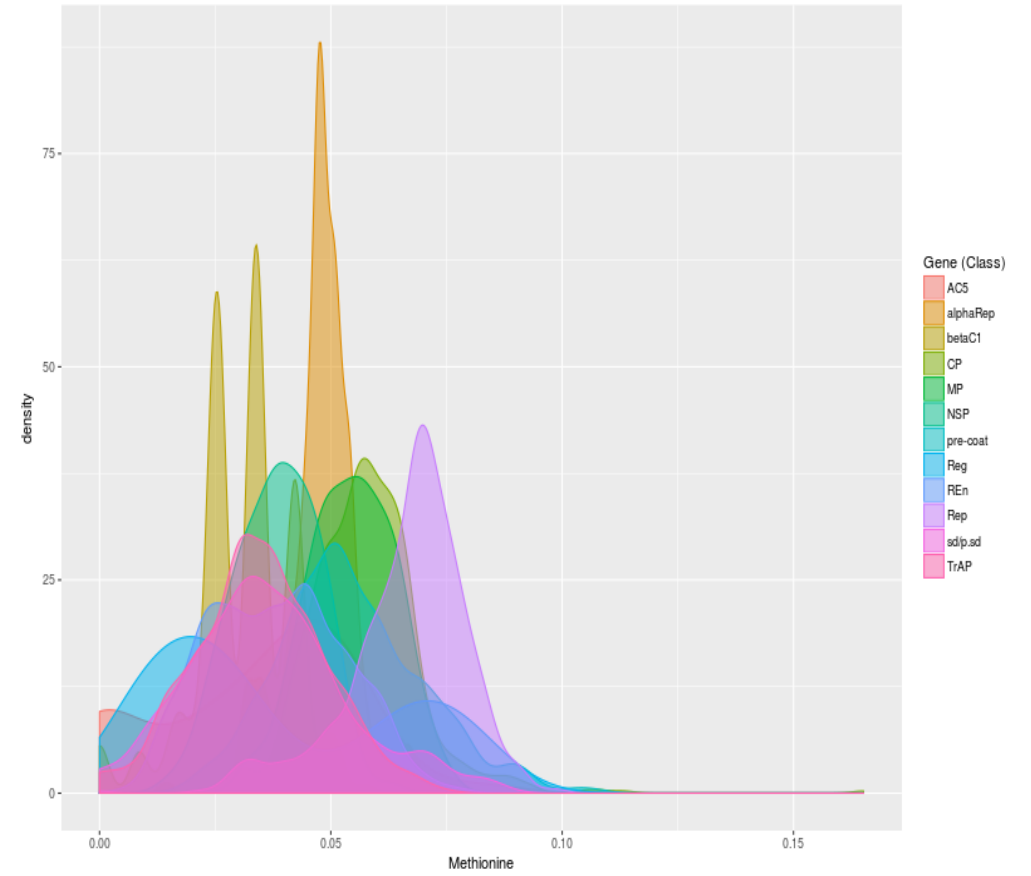

Boxplots



# Proportion of Adenine

Histogram

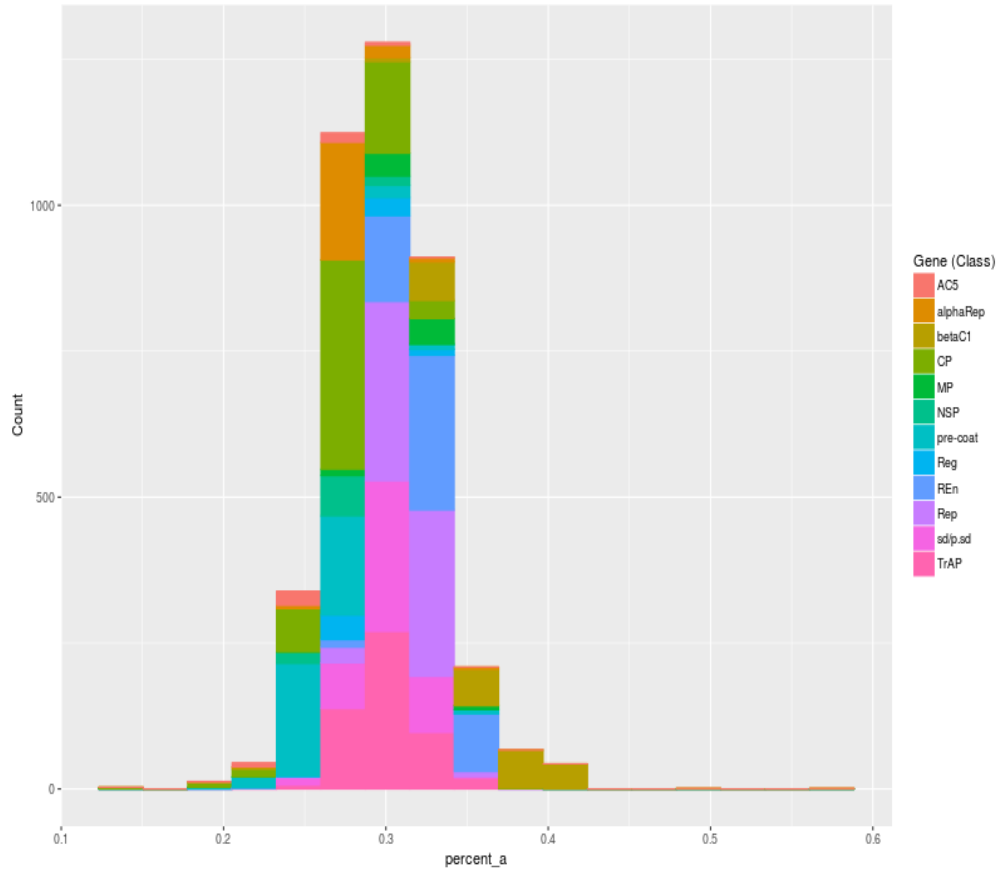

Density

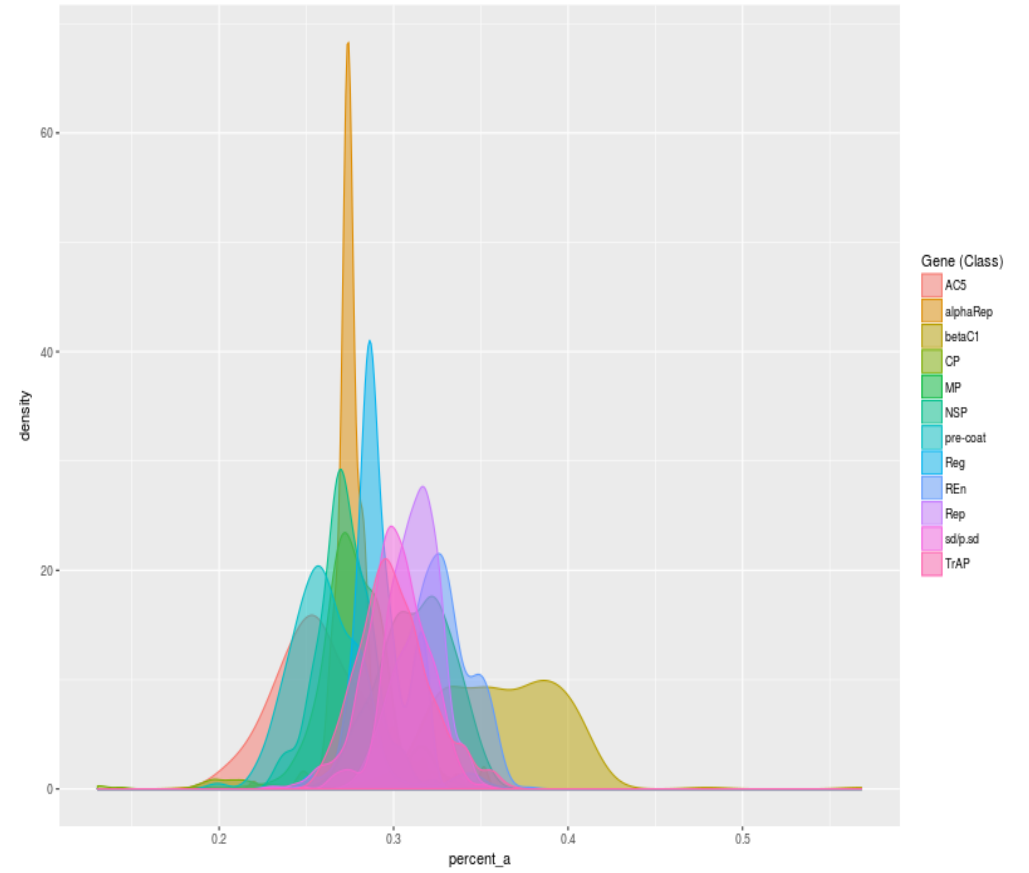

Boxplots

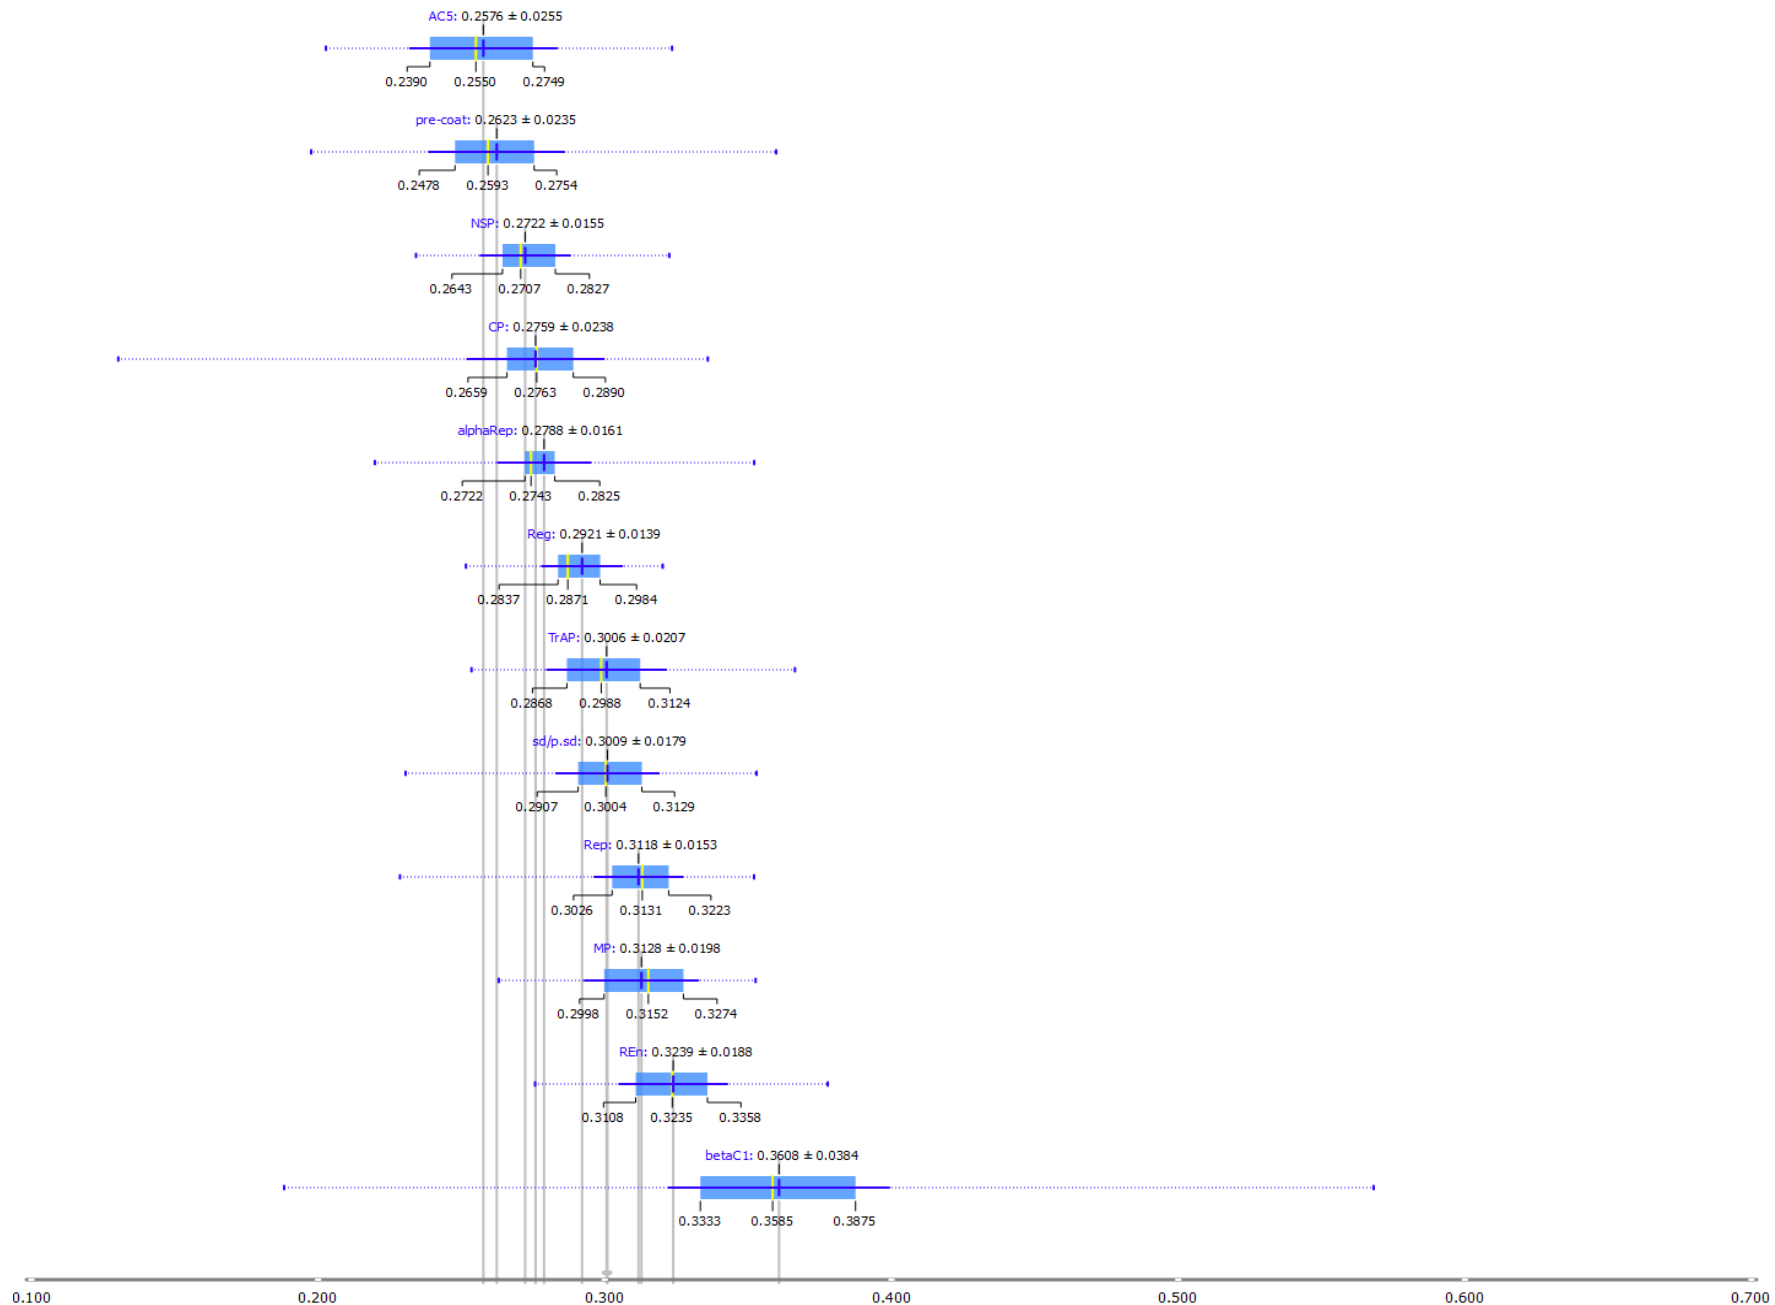

## Proportion of Adenine in region 1

Histogram

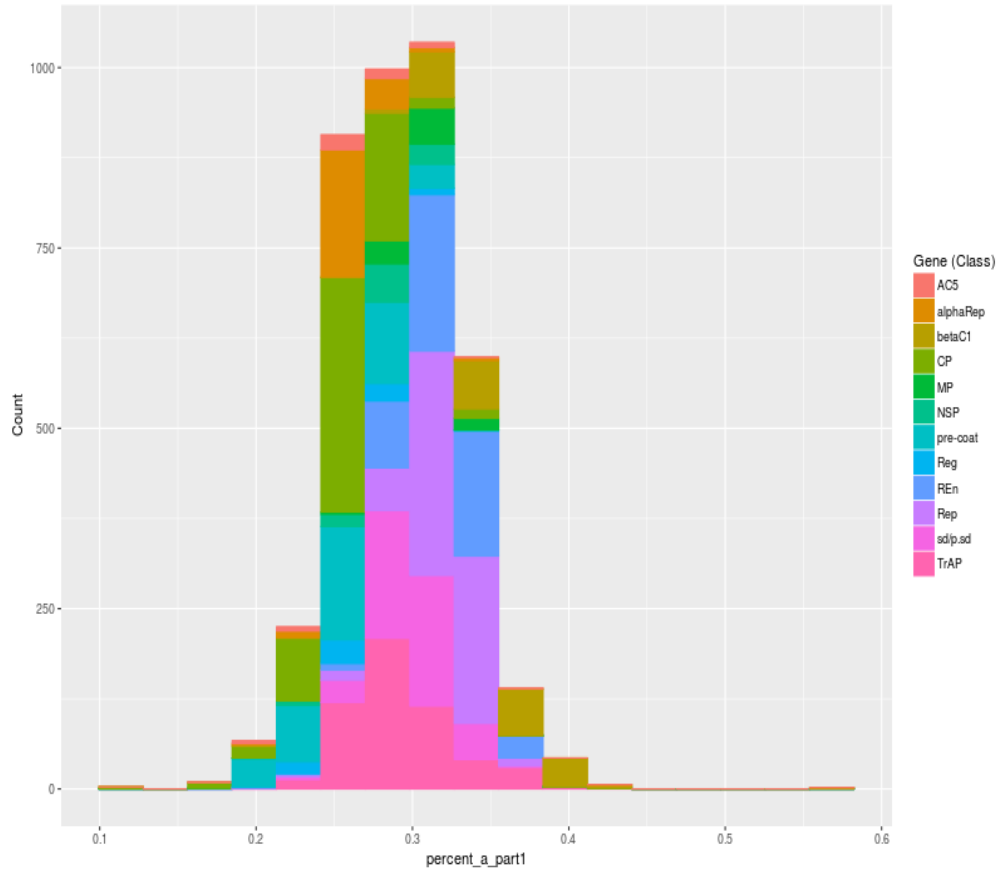

Density

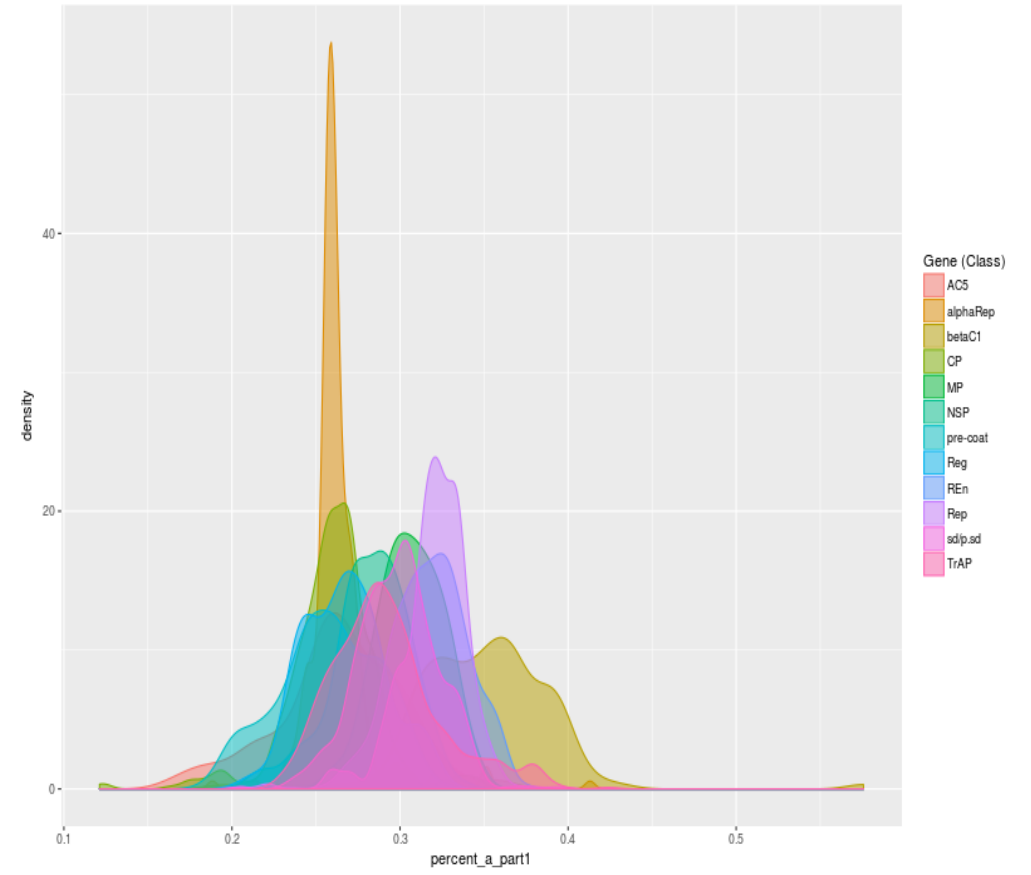

Boxplots

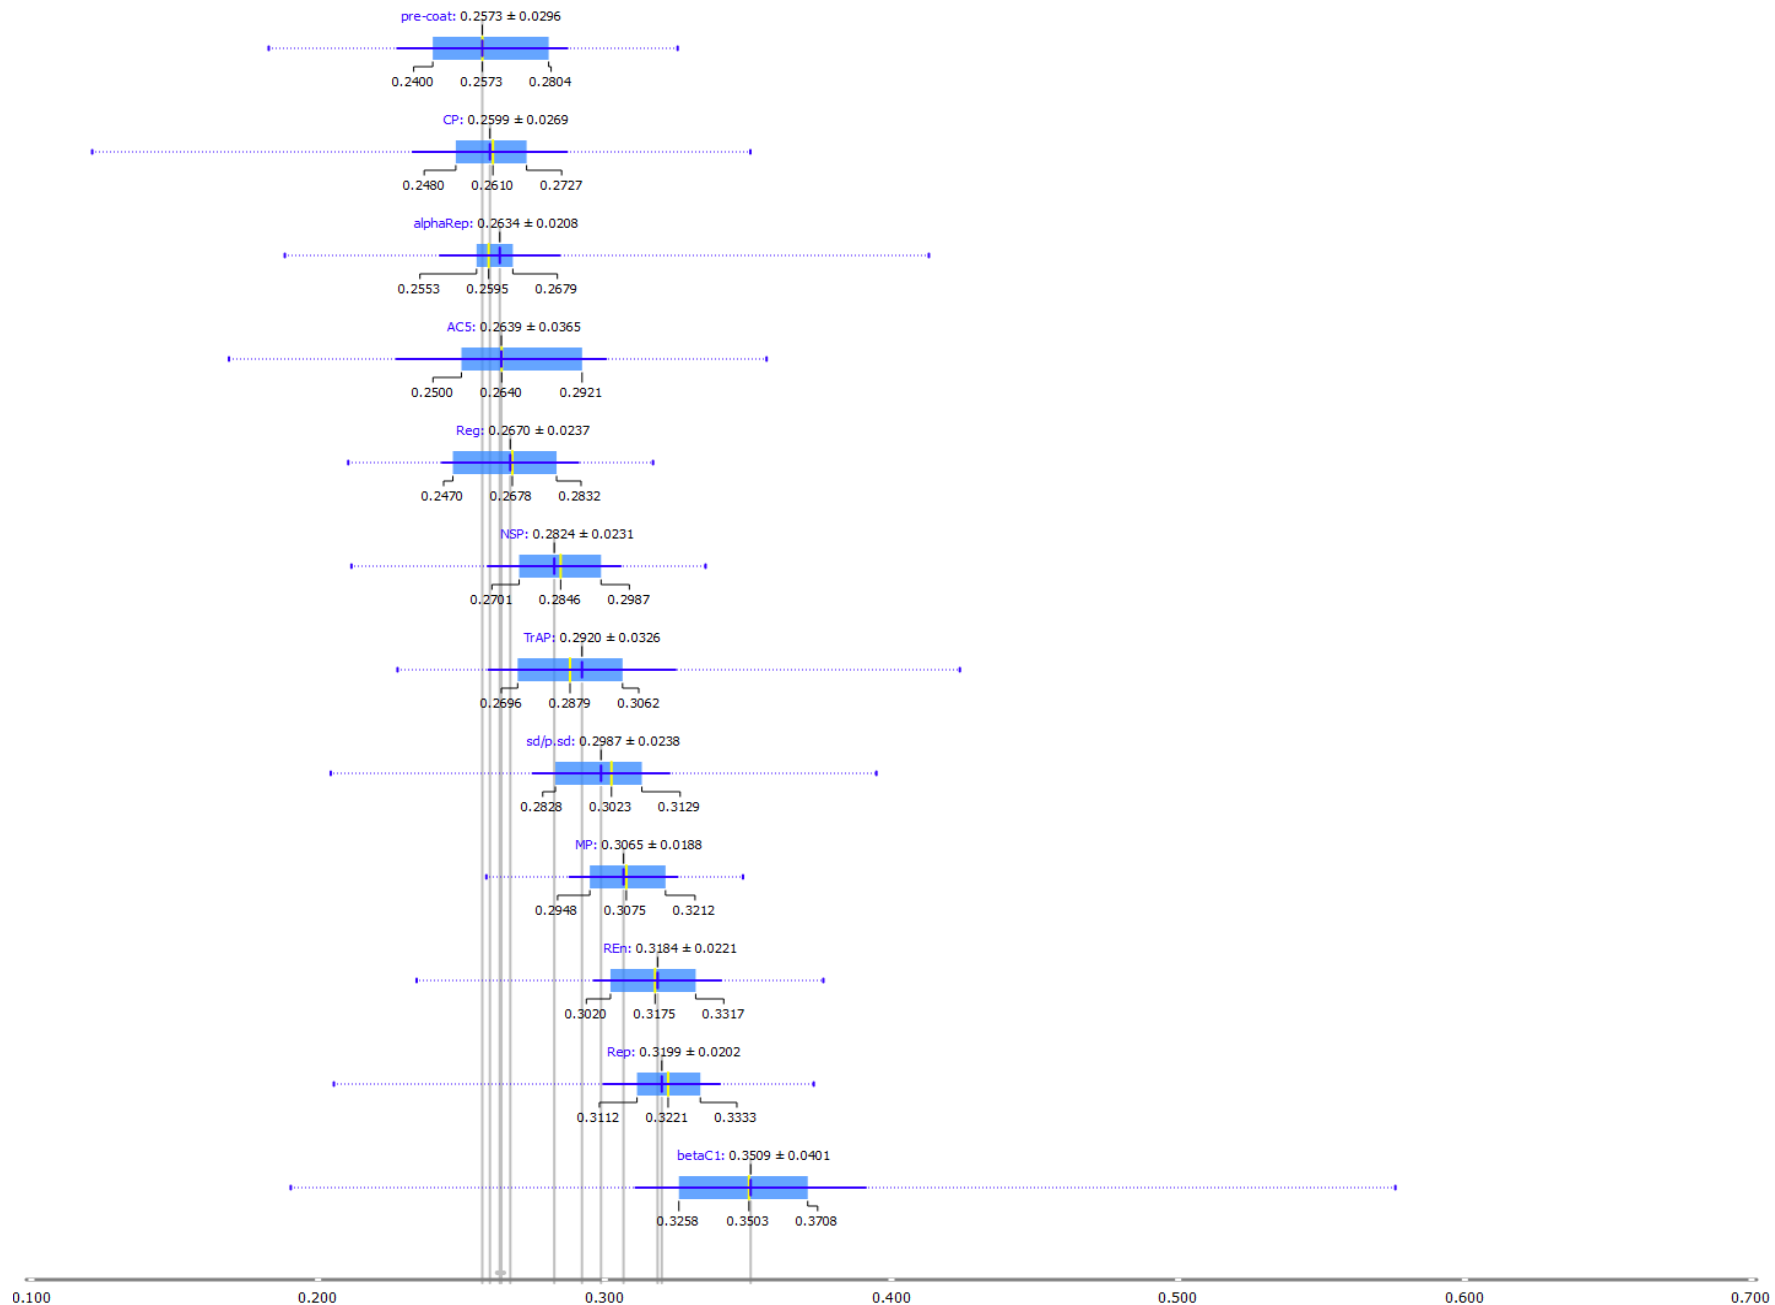

## Proportion of Adenine in region 2

Histogram

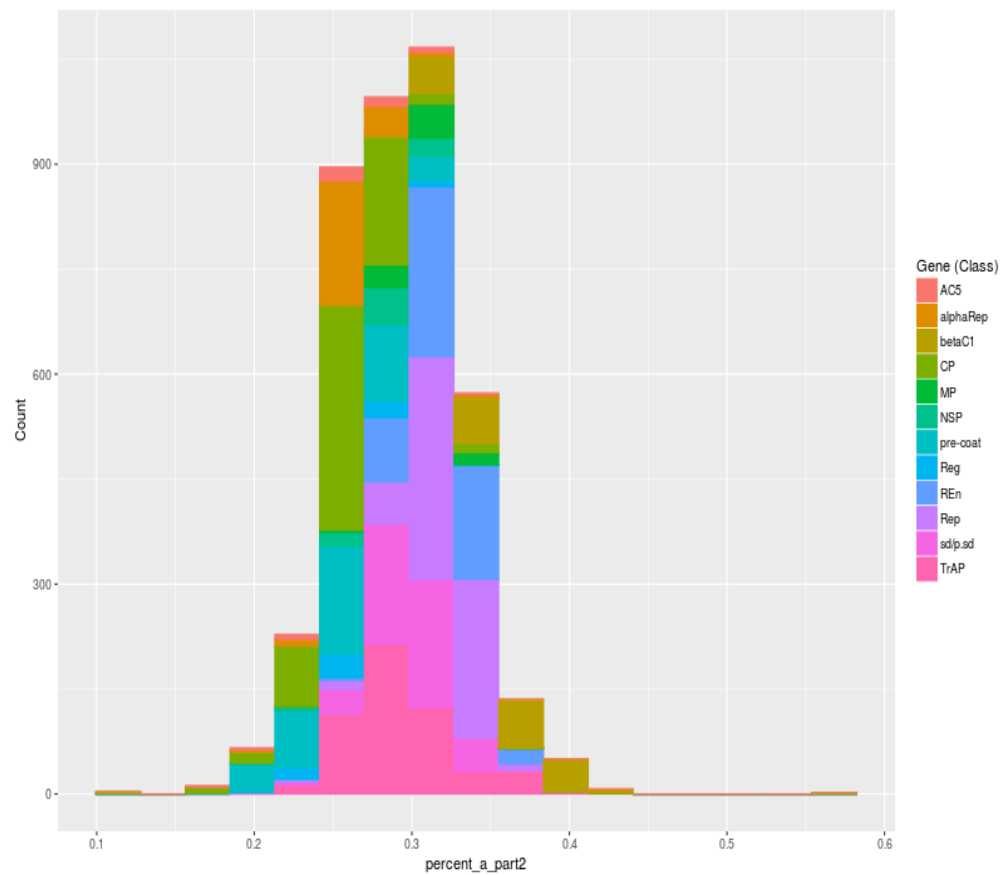

Density

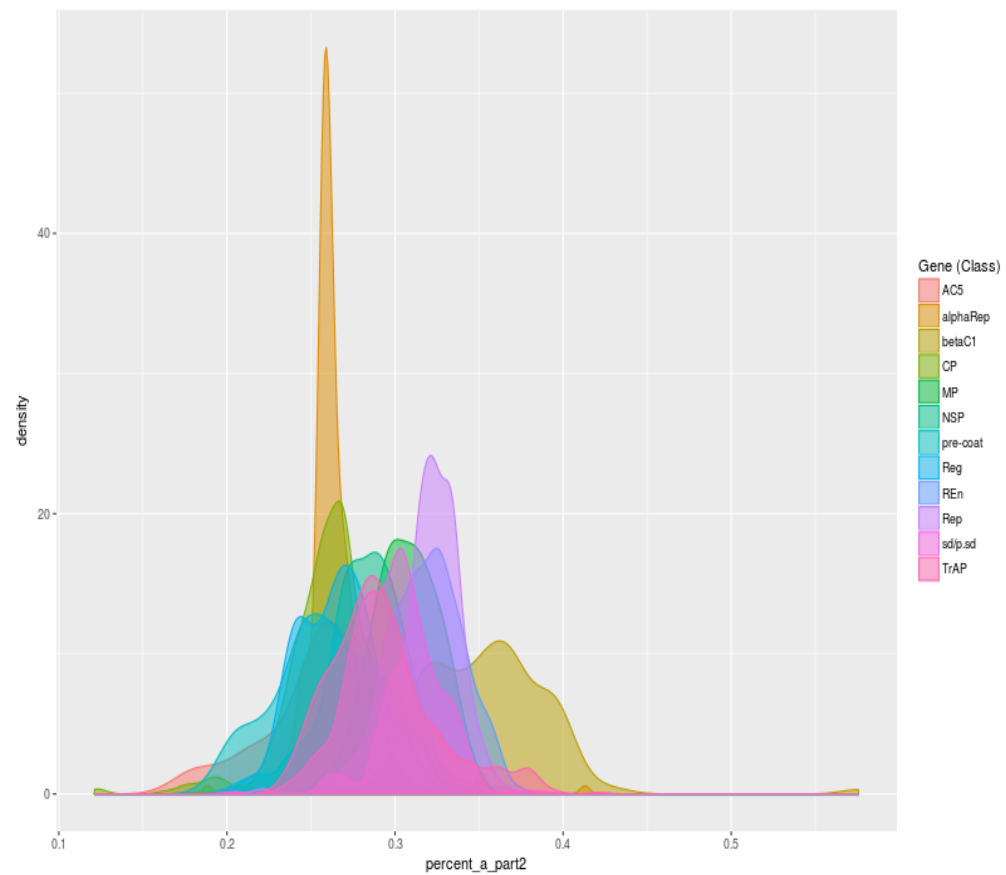



Boxplots

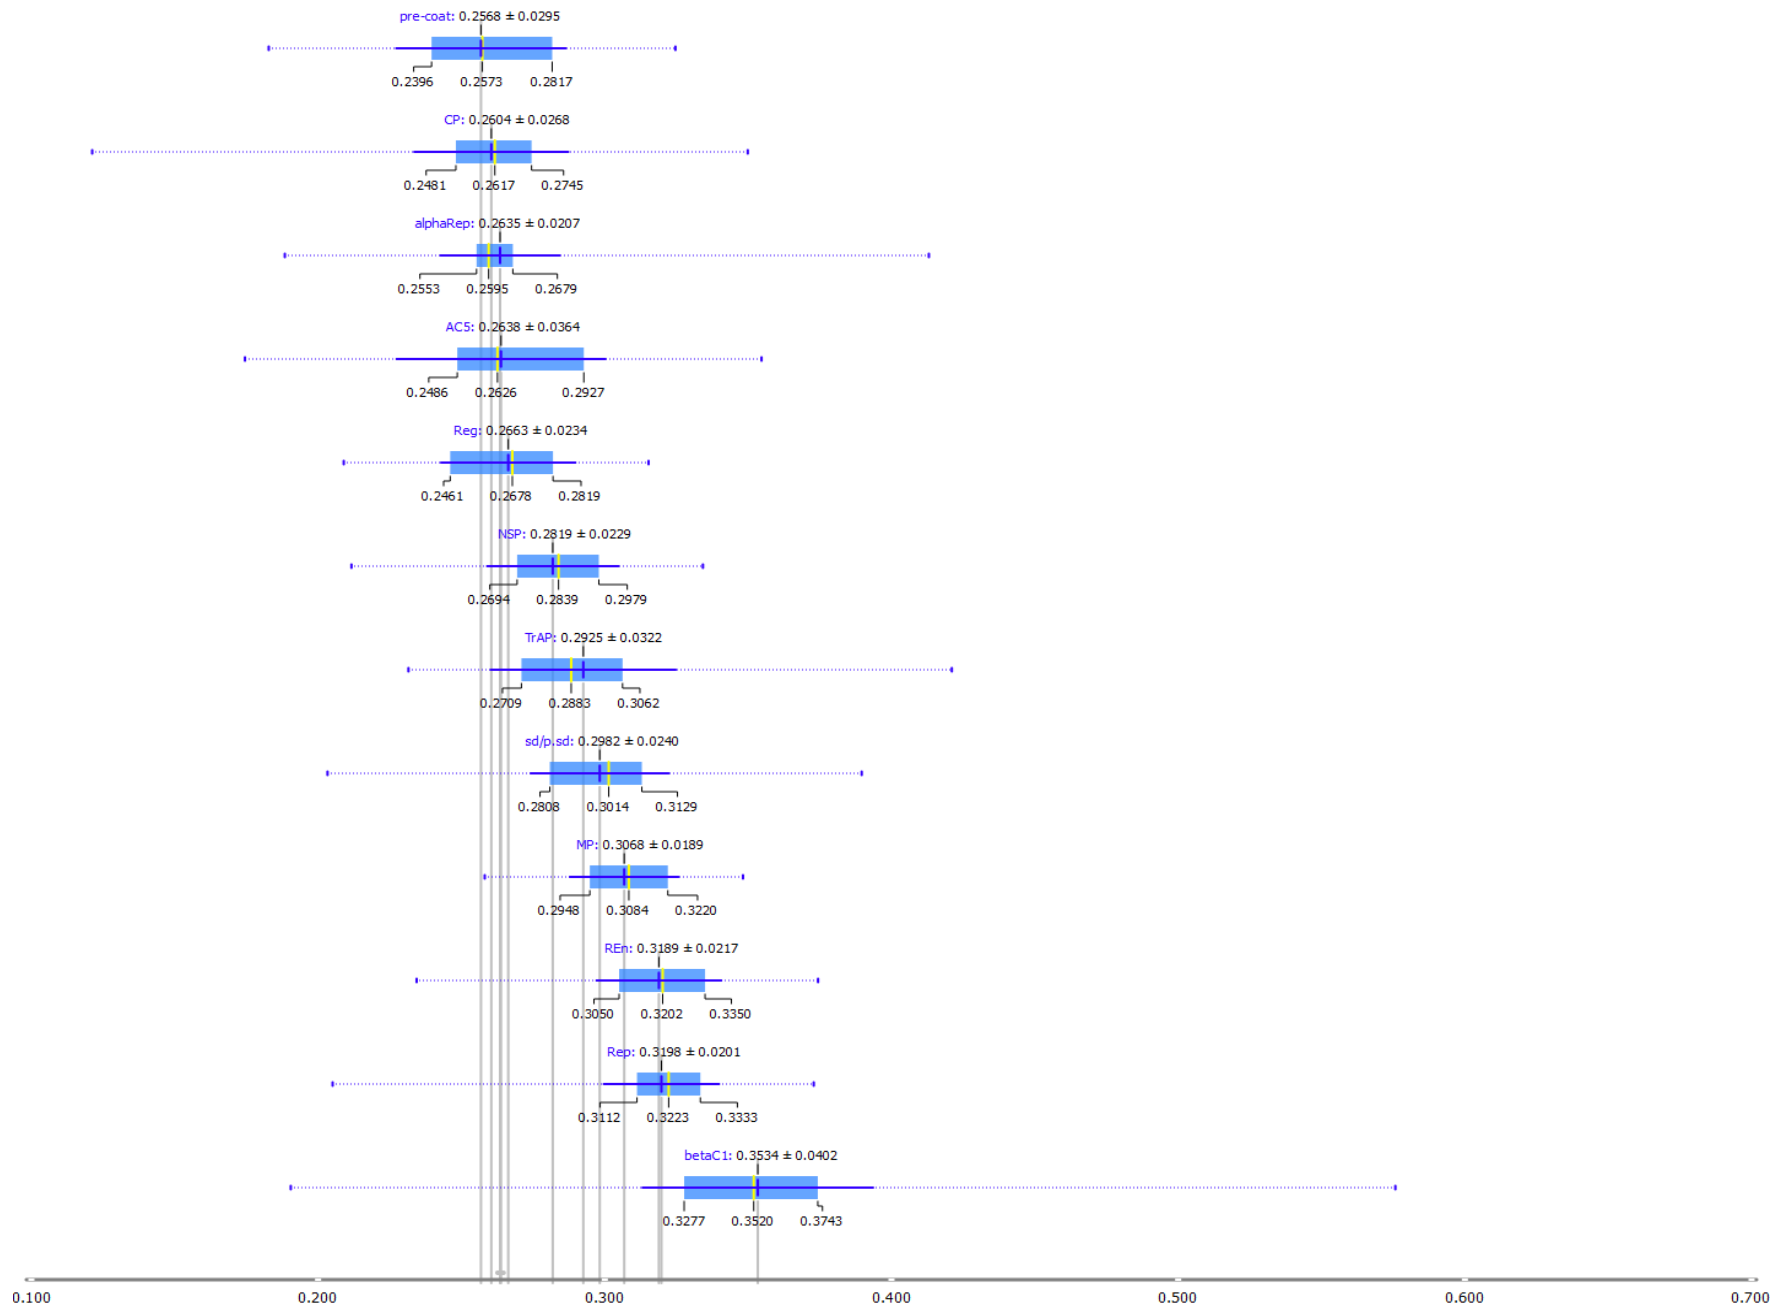

# Proportion of Cytosine

## Histogram

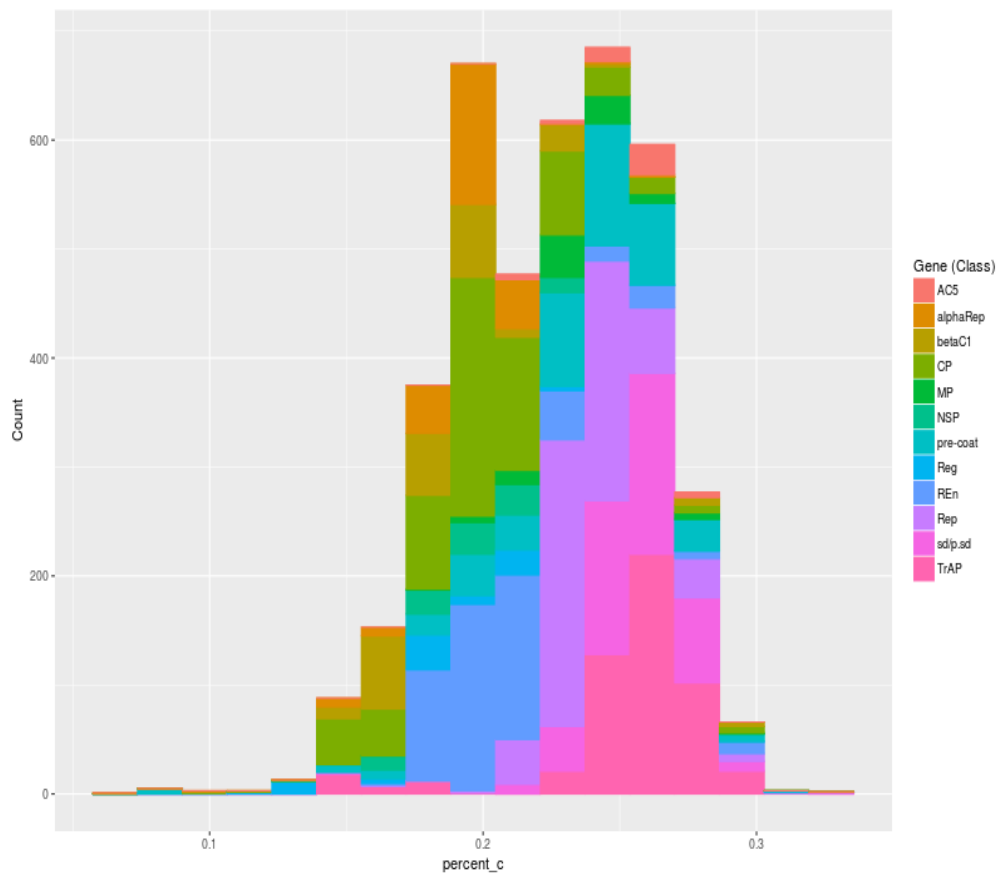

## Density

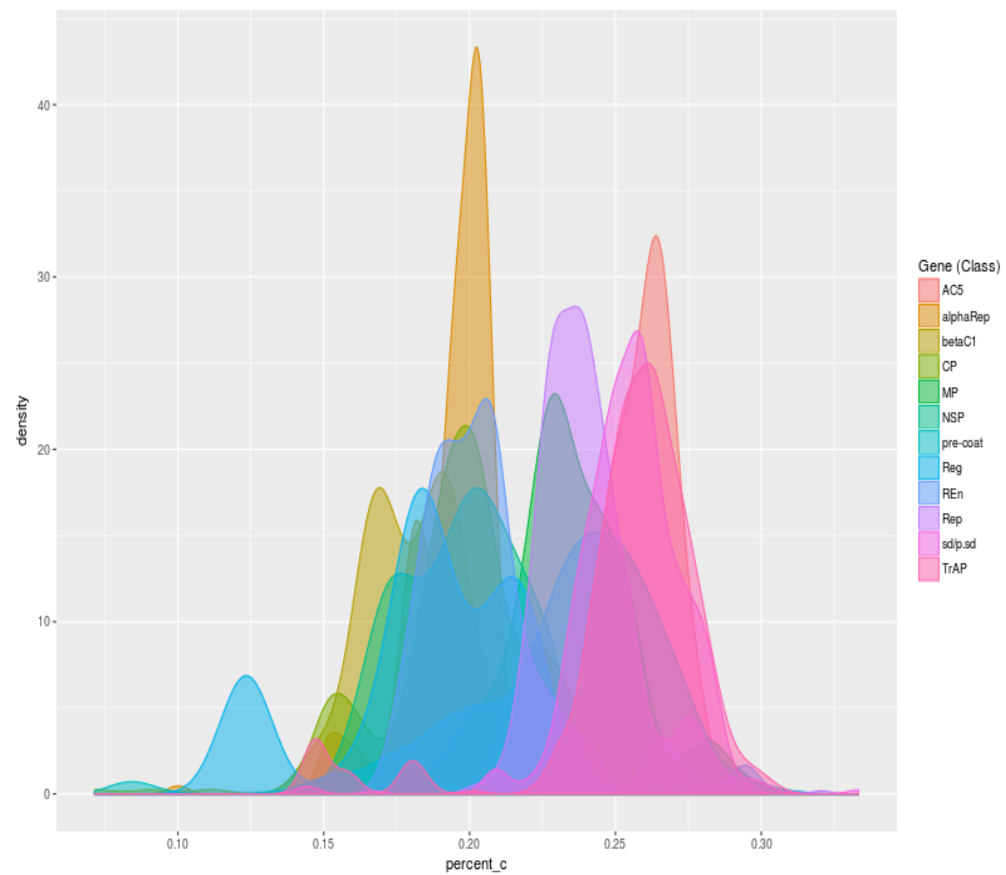

Boxplots

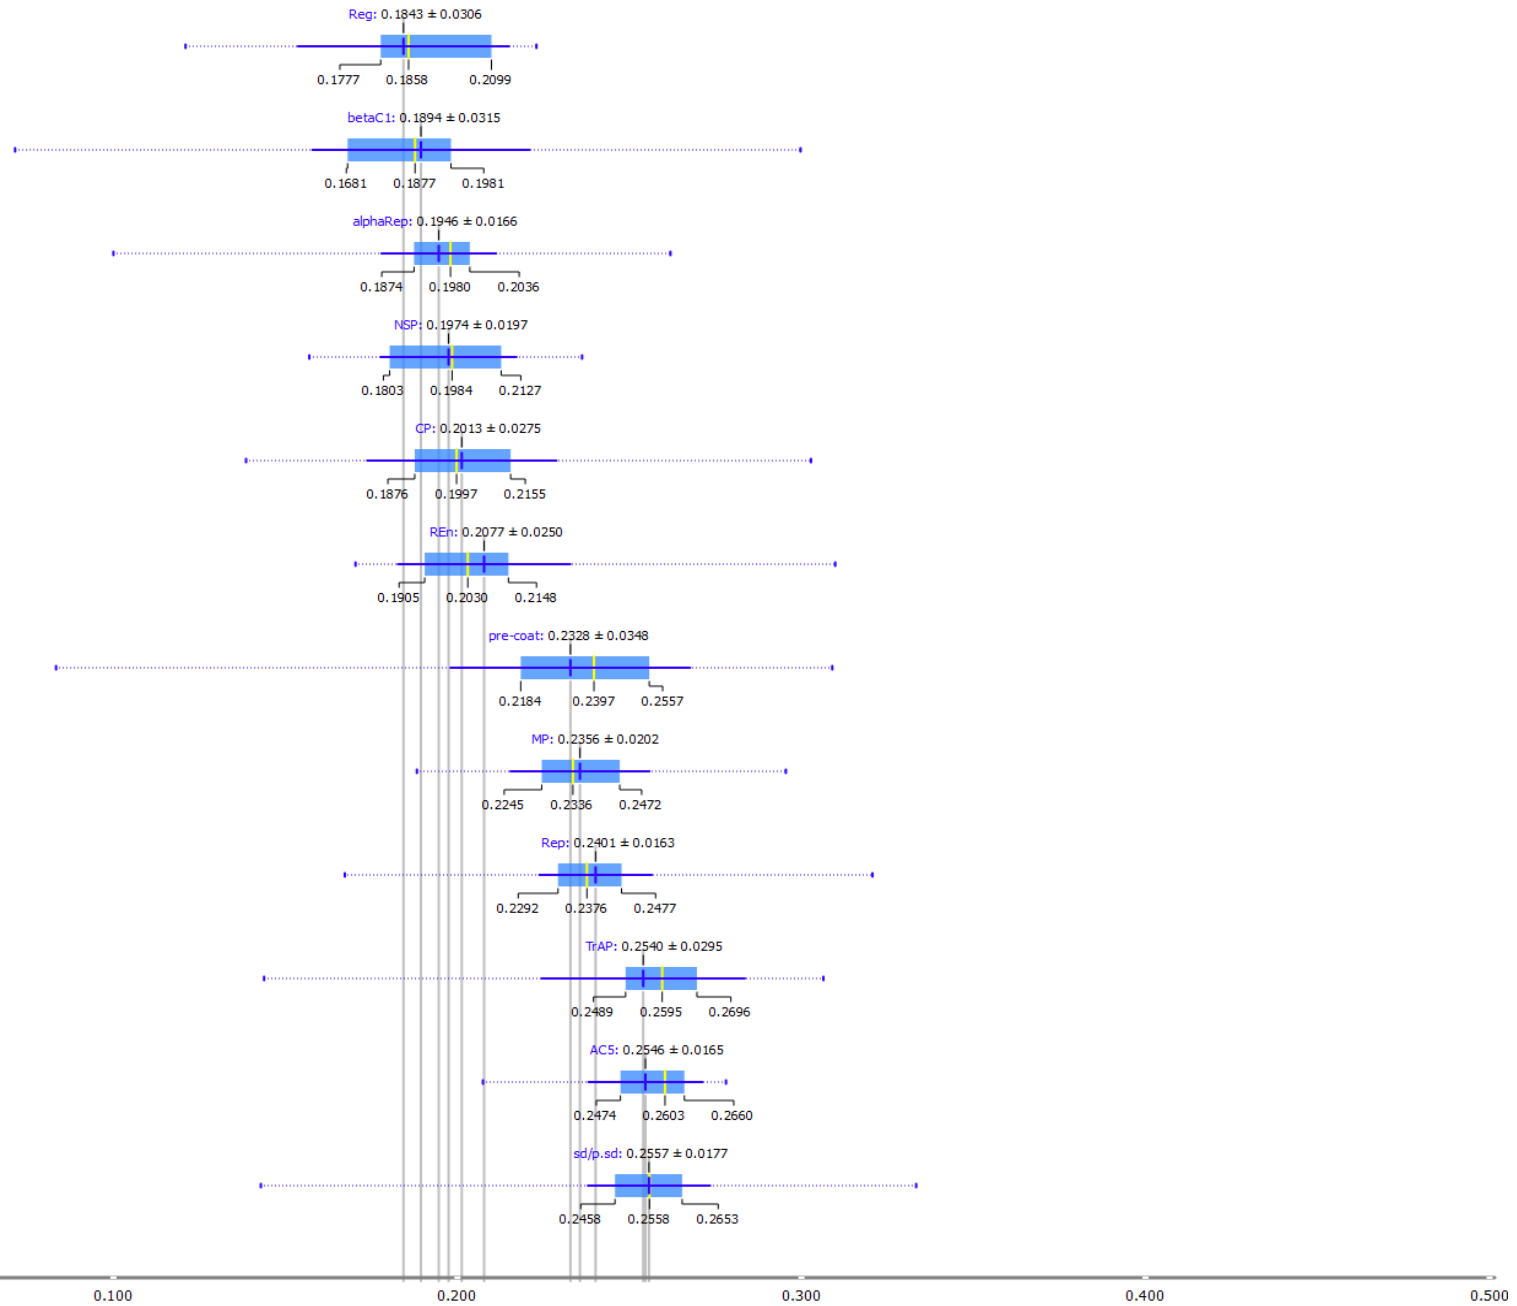

## Proportion of Cytosine in region 1

Histogram

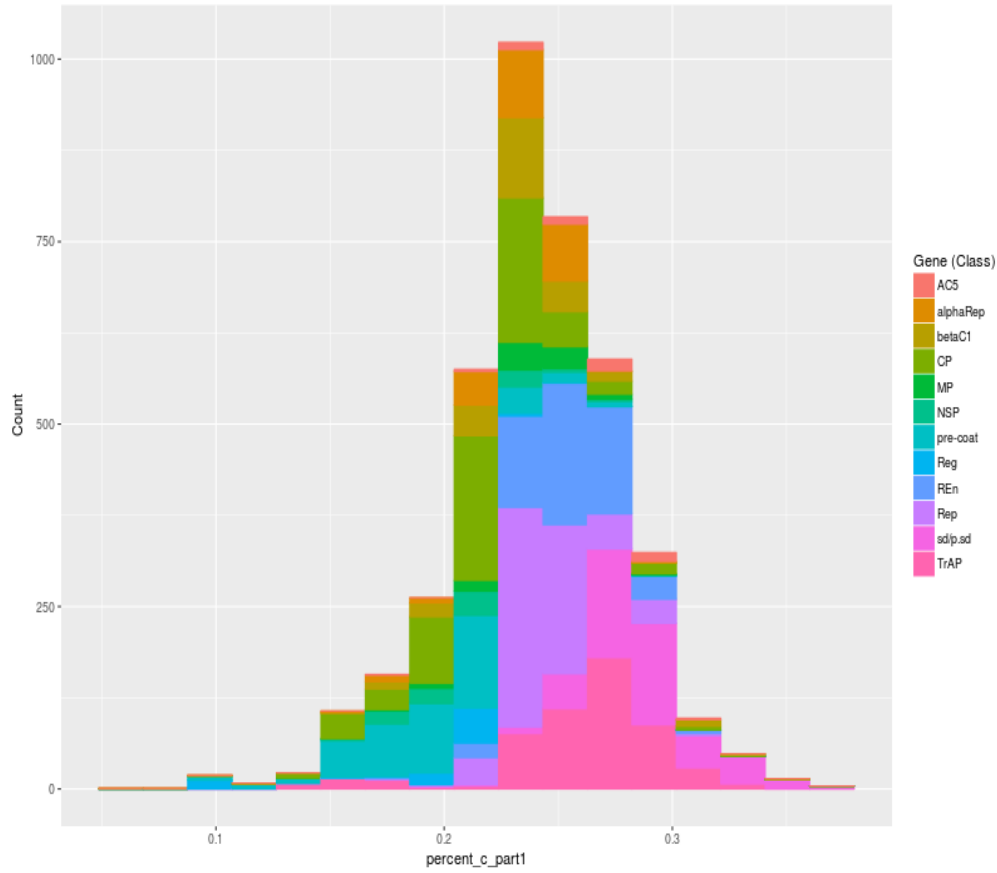

Density

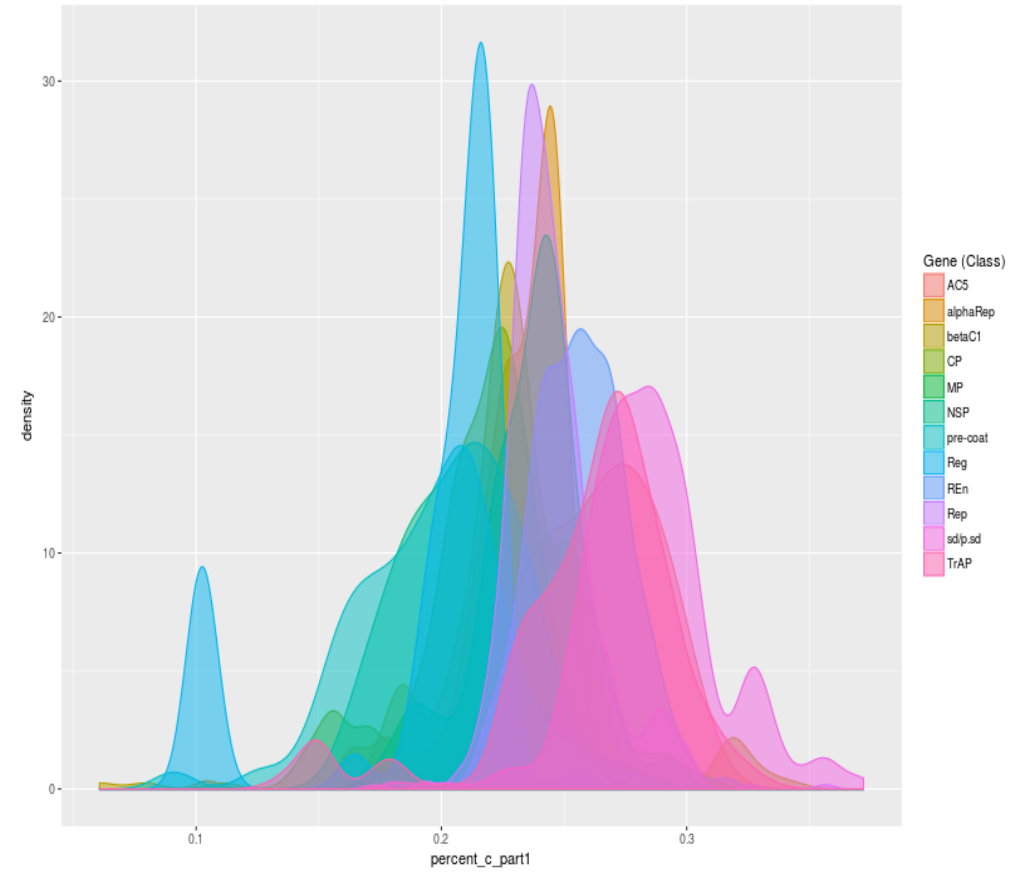

Boxplots

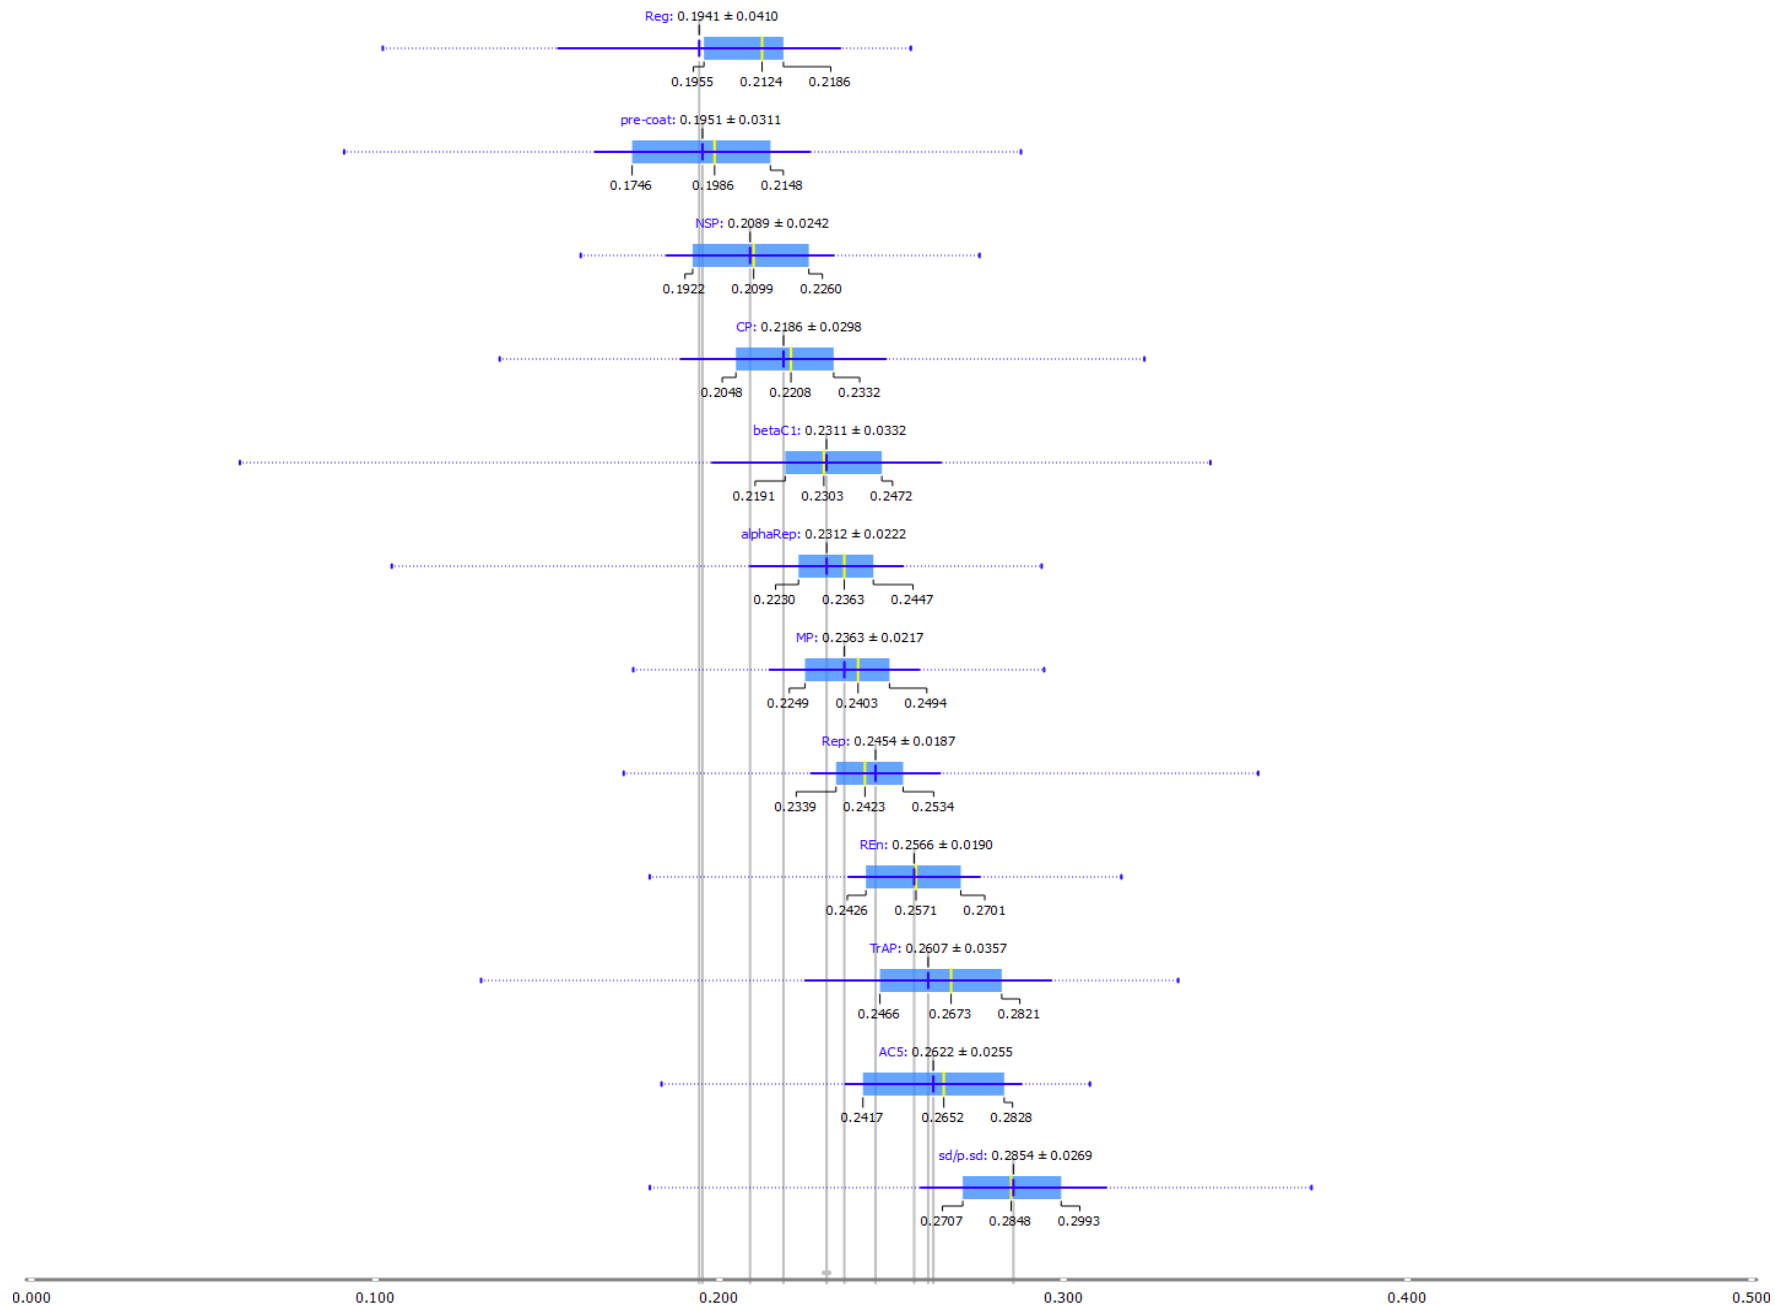

## Proportion of Cytosine in region 2

Histogram

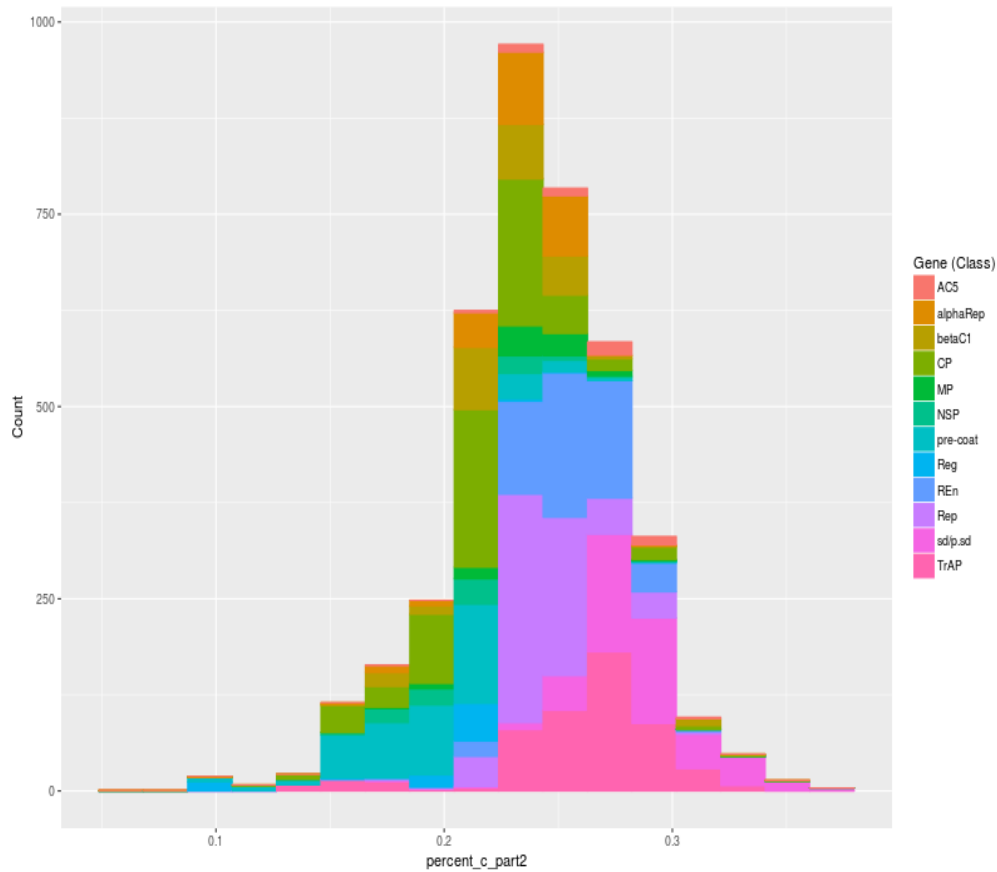

Density

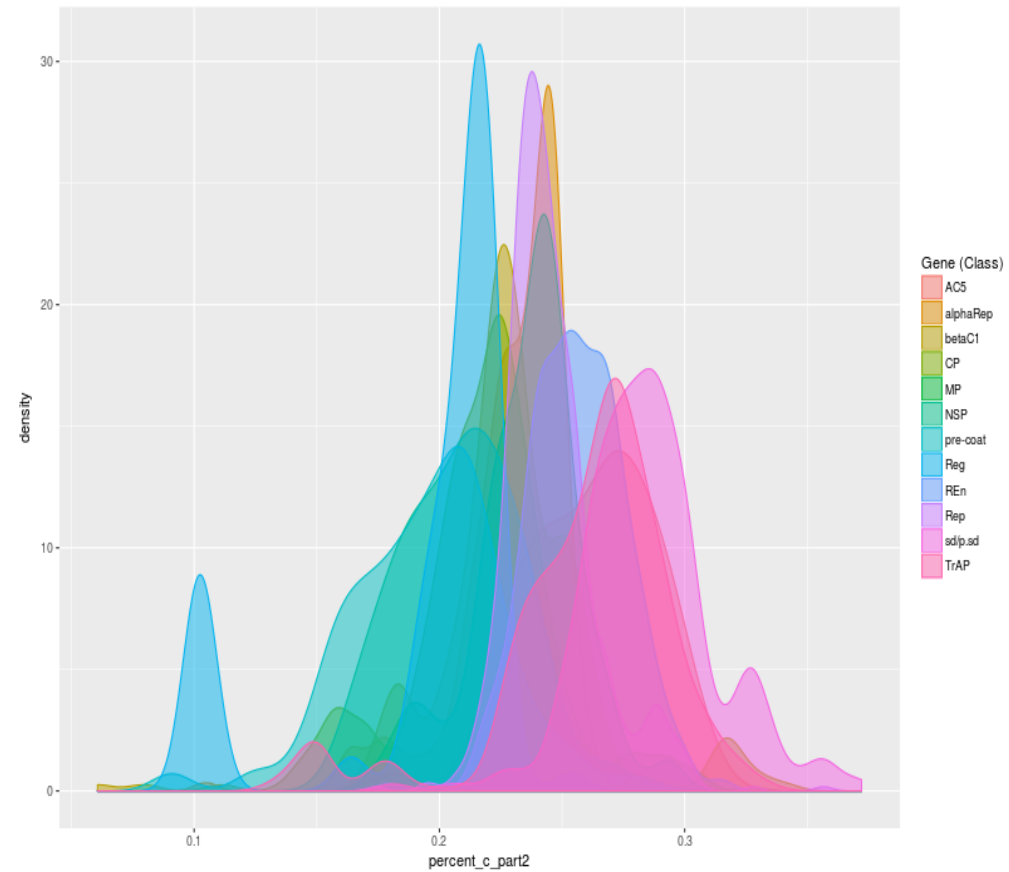

Boxplots

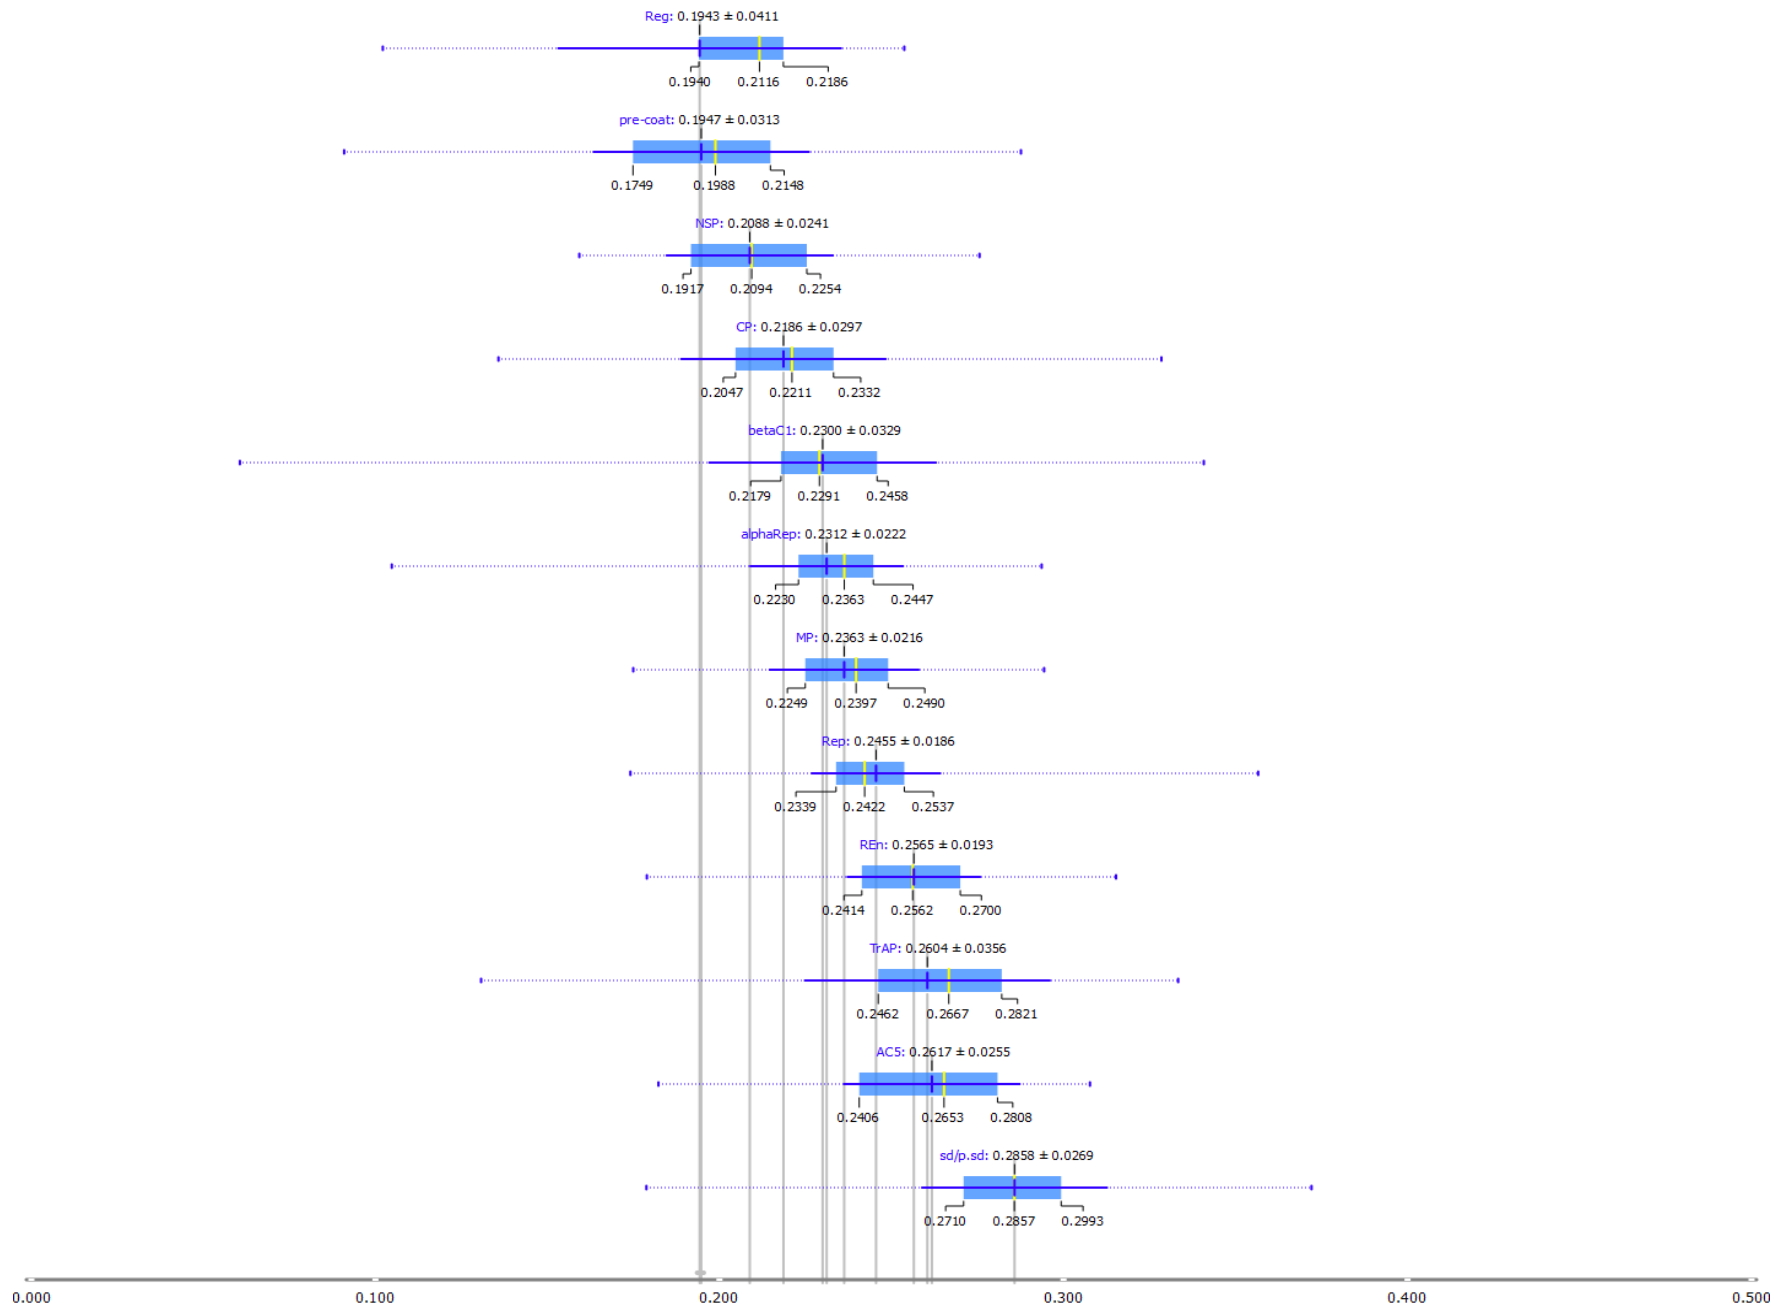

# Proportion of Guanine

Histogram

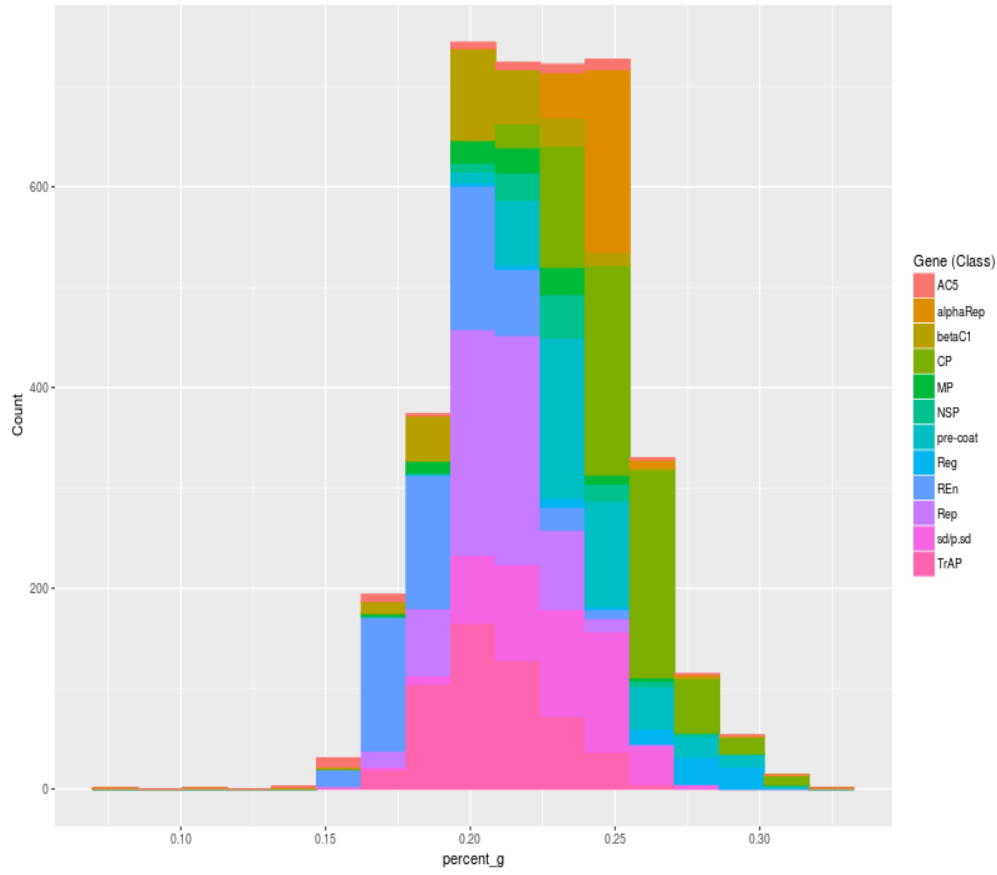

Density

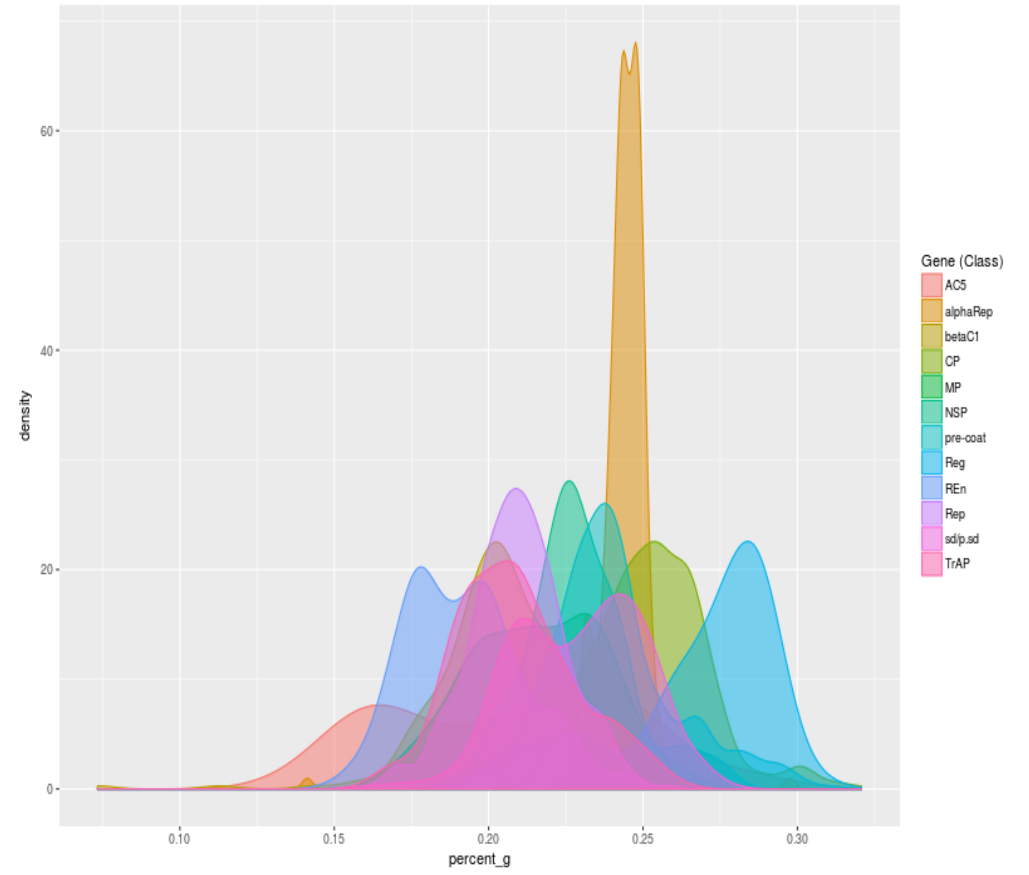



Boxplots

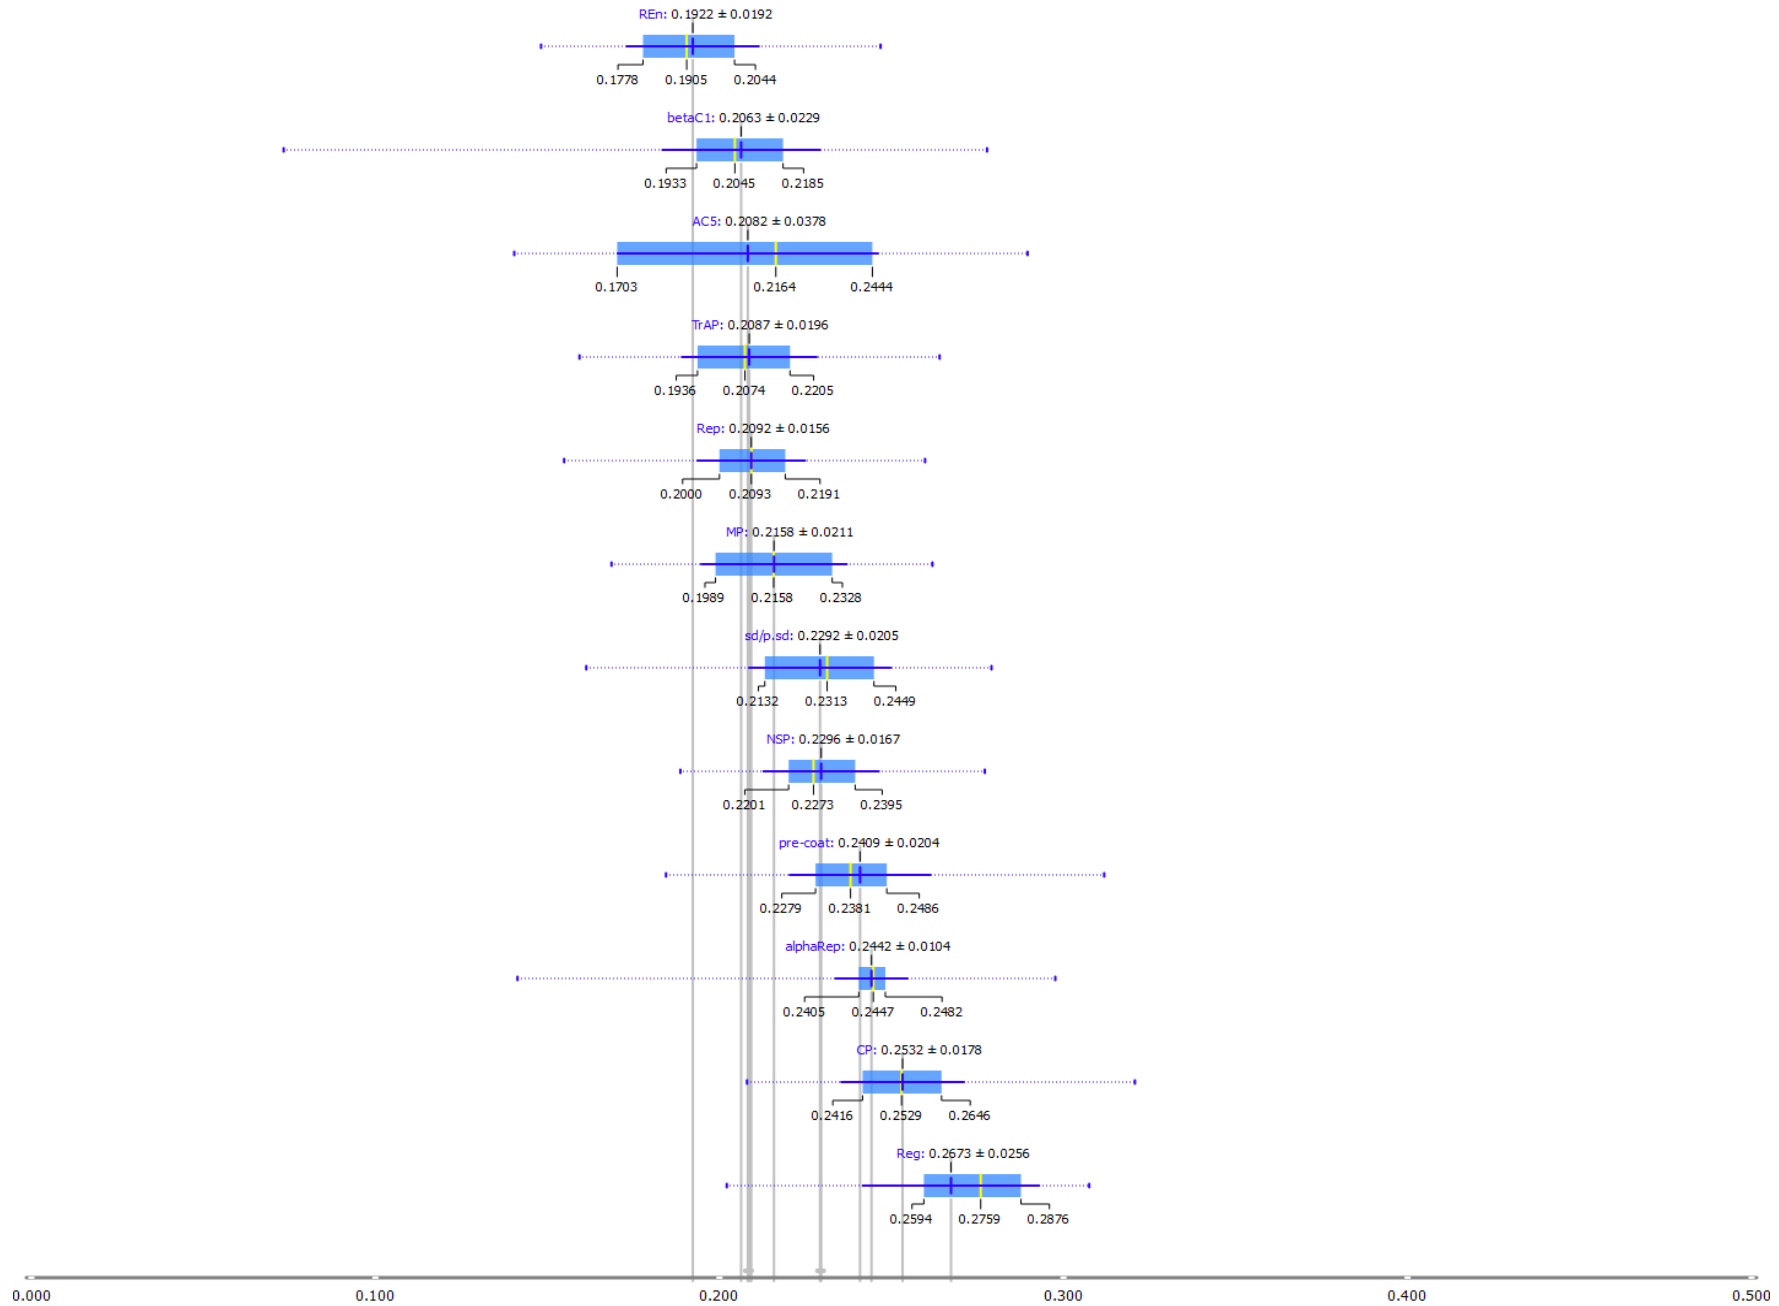

# Proportion of Guanine in region 1

Histogram

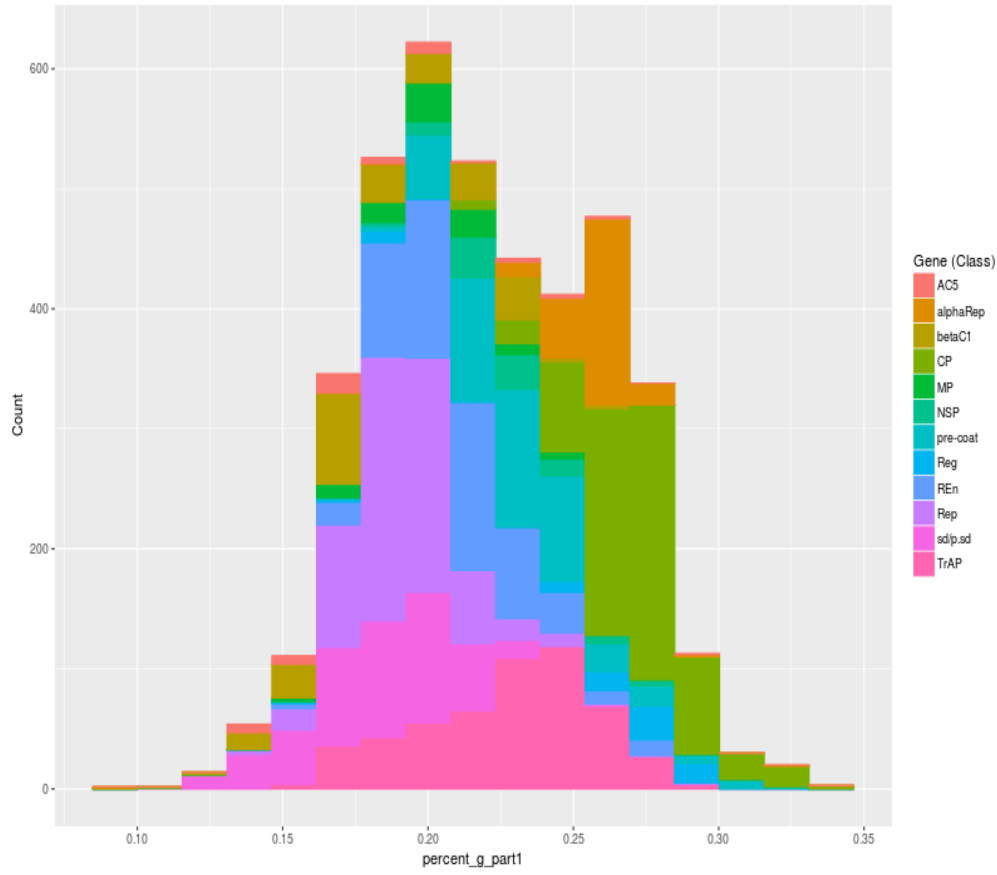

Density

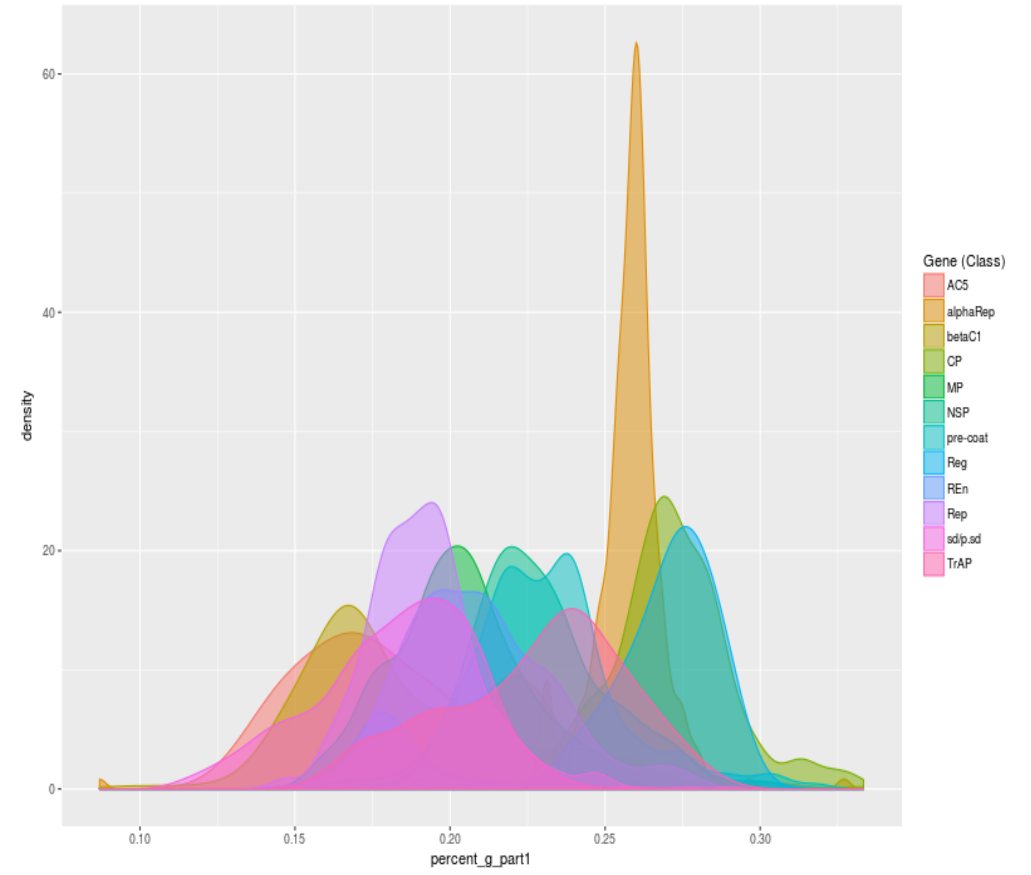

Boxplots

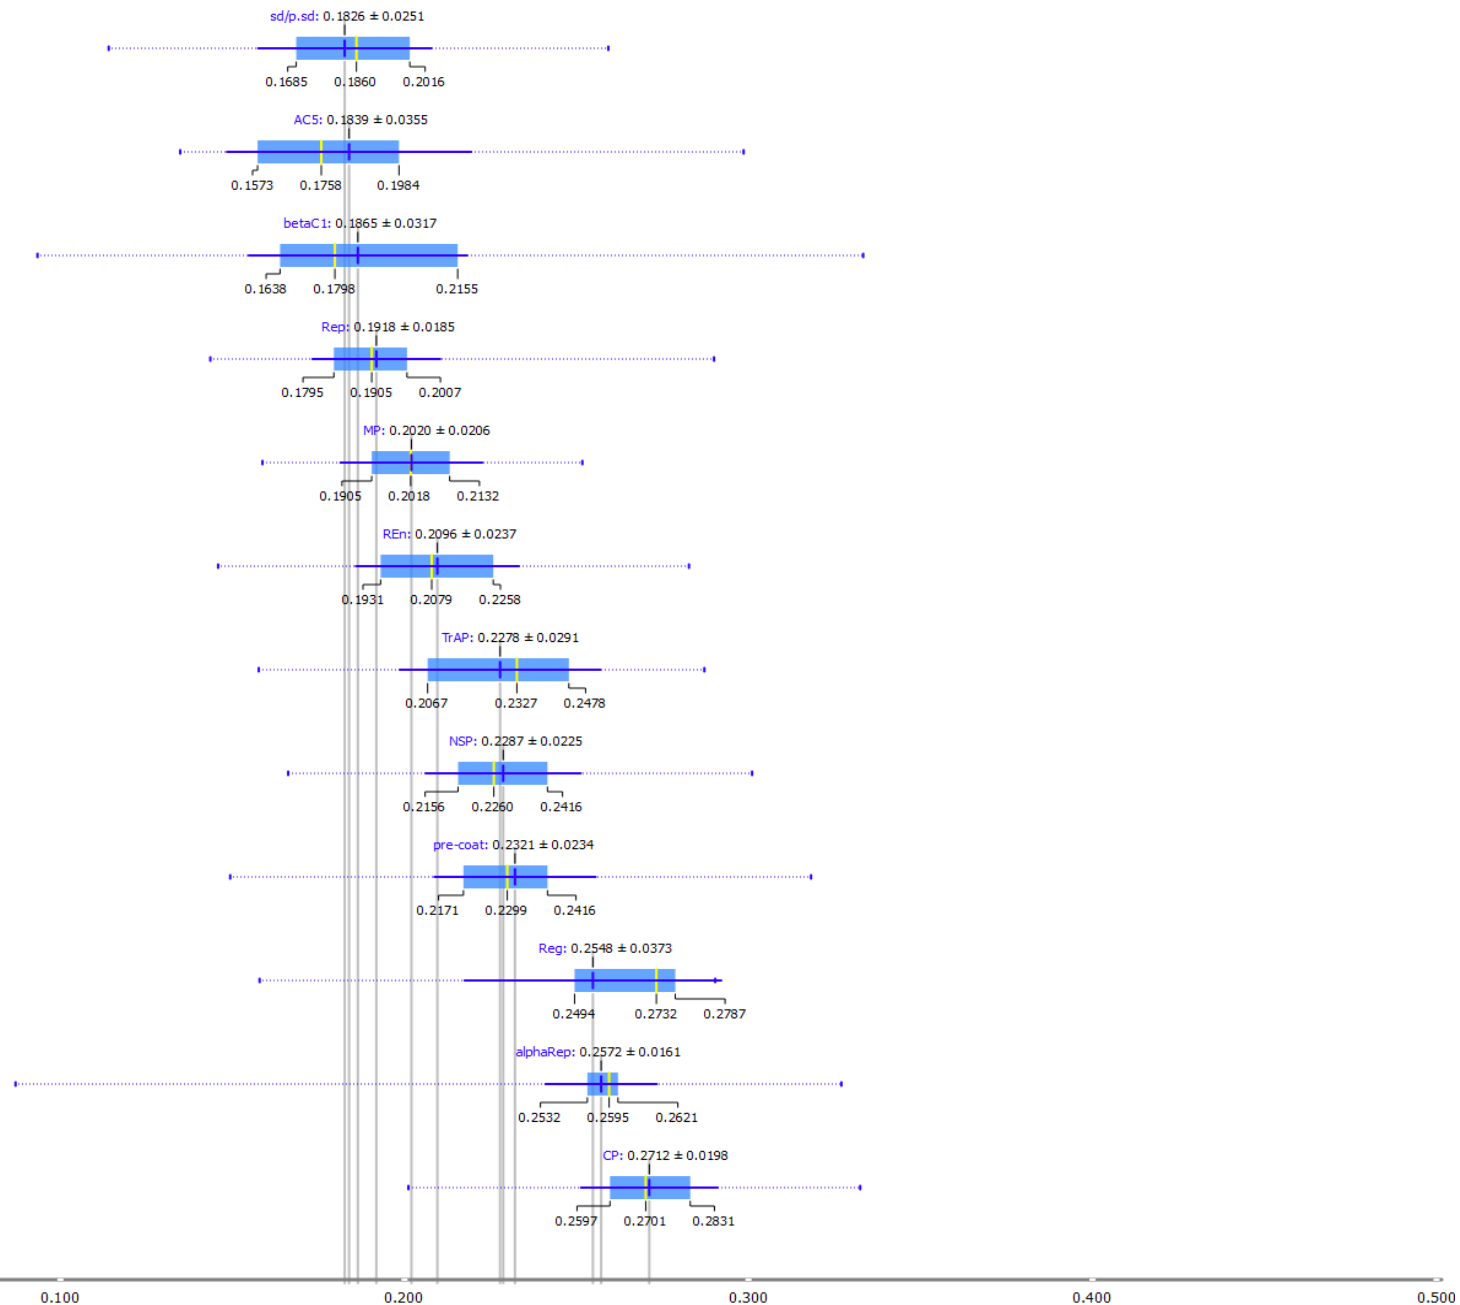

## Proportion of Guanine in region 2

Histogram

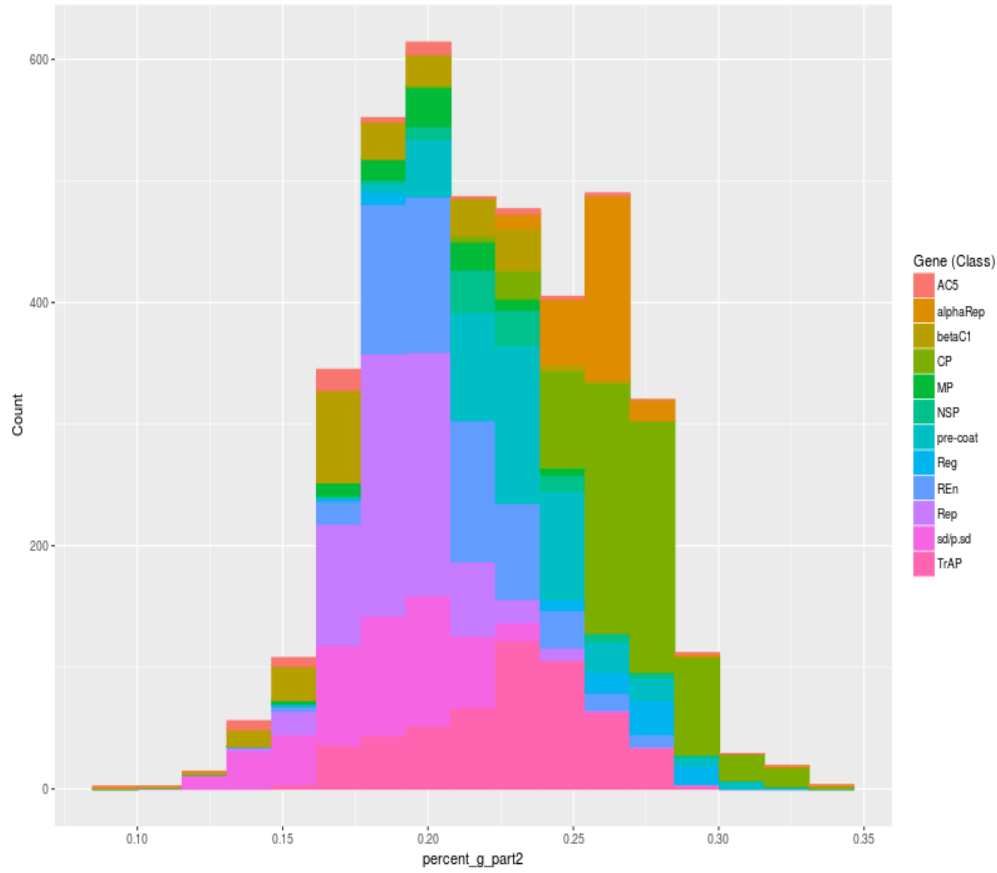

Density

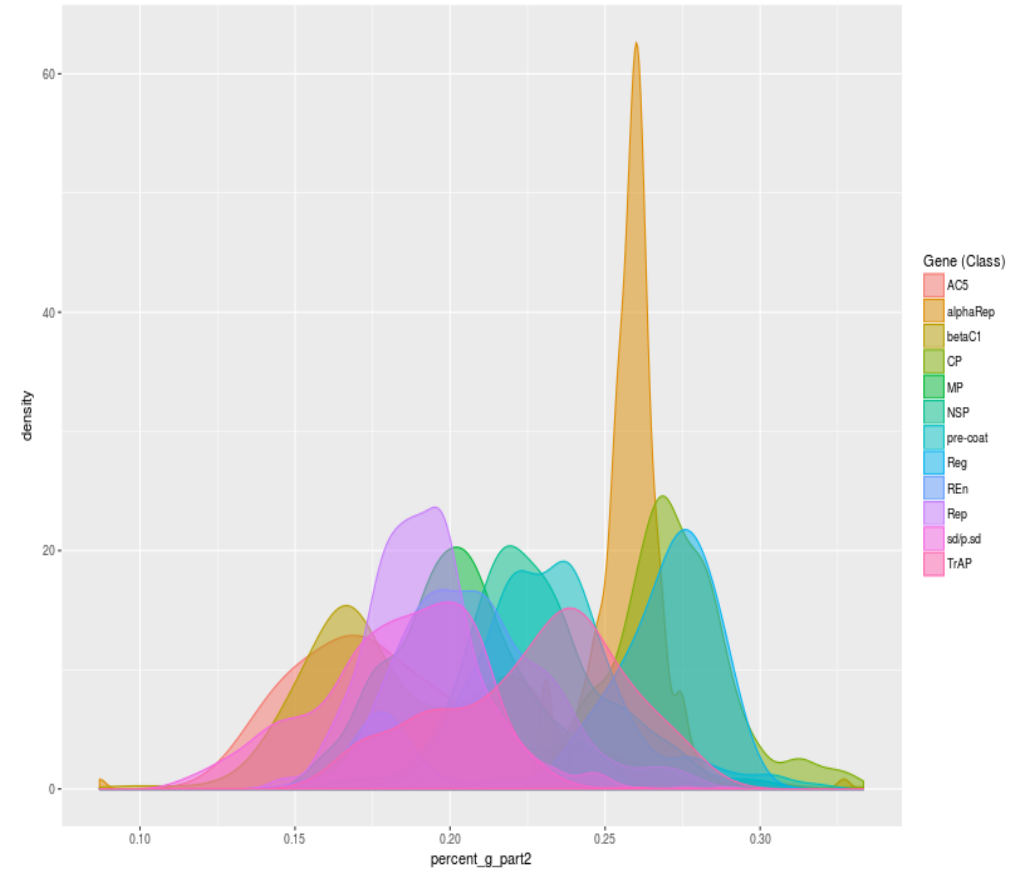

Boxplots

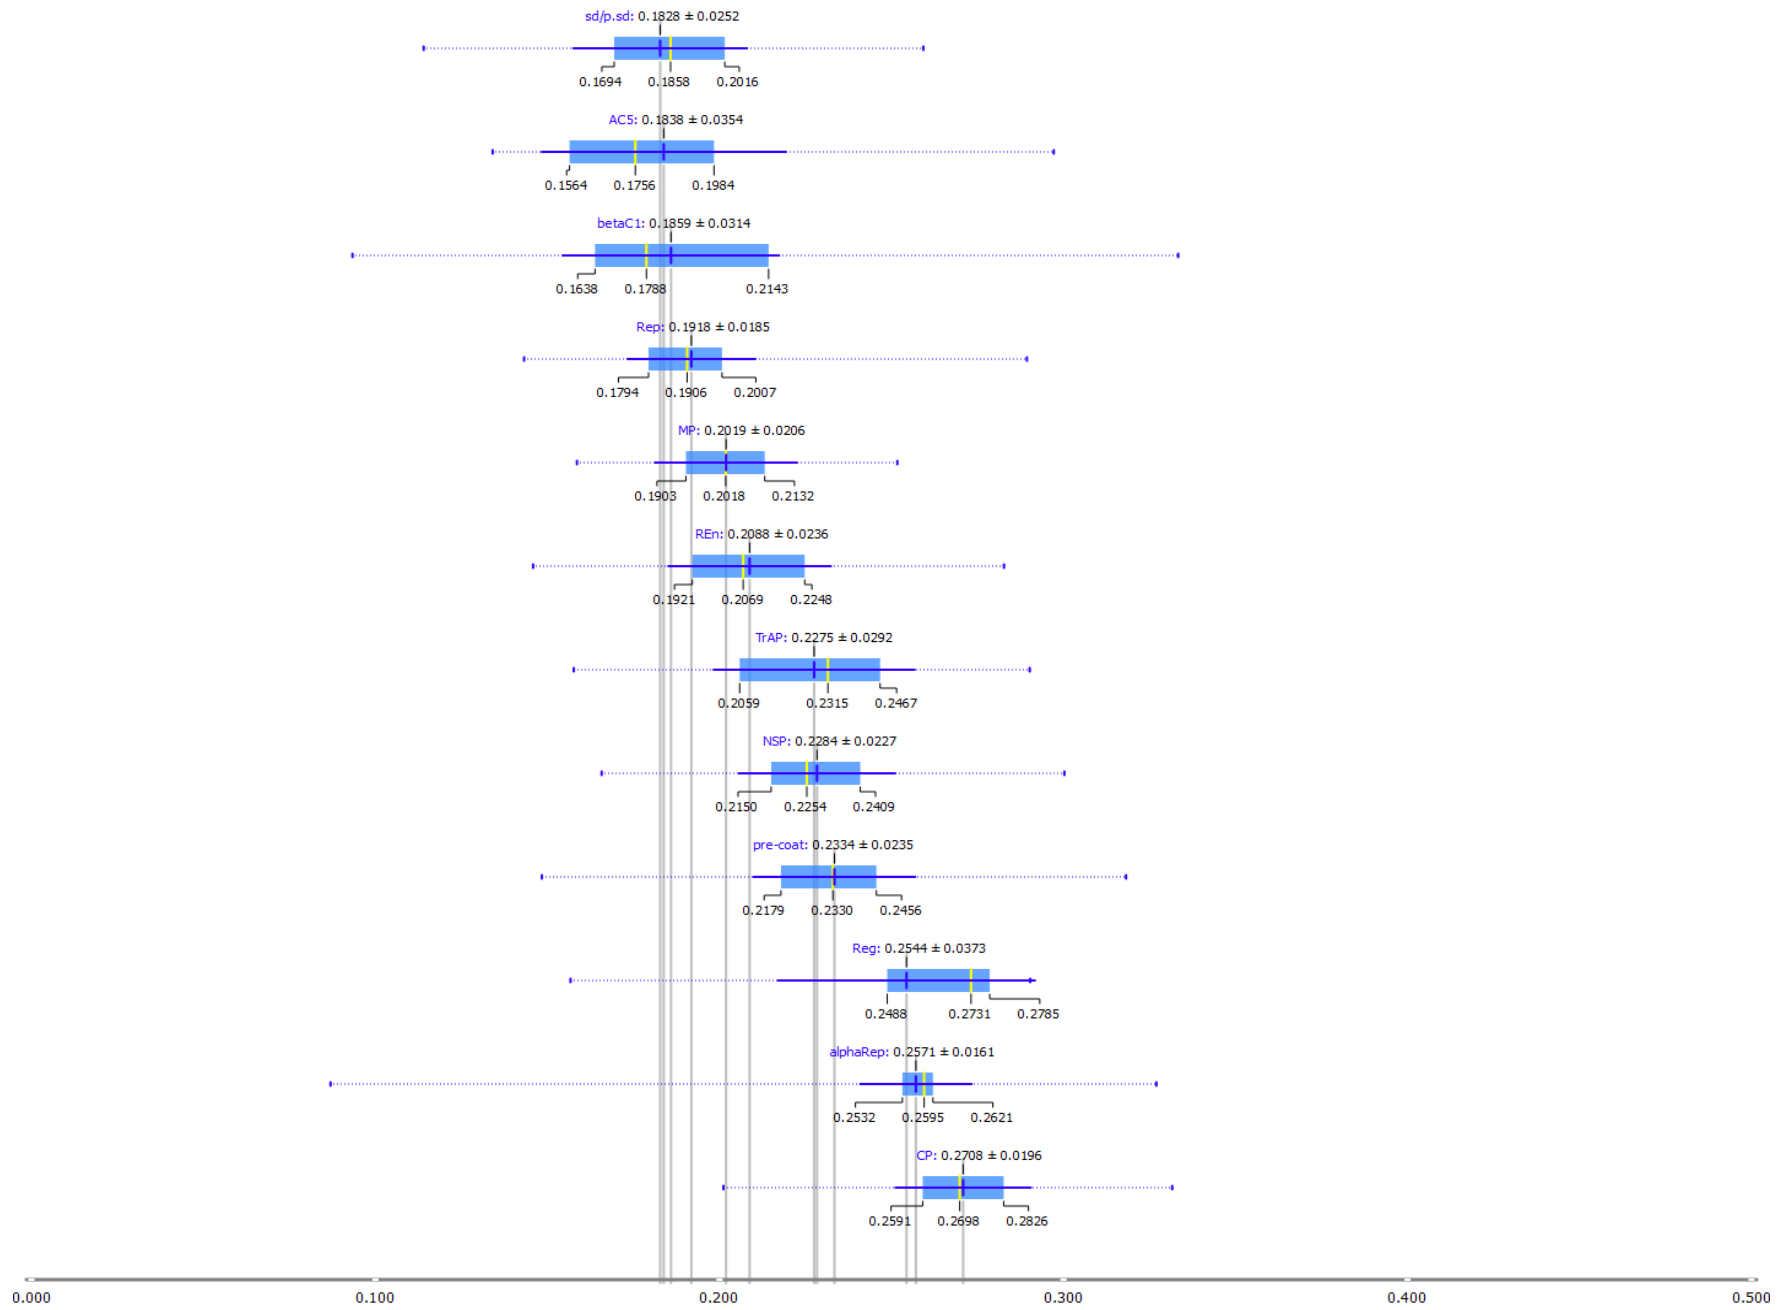

# Proportion of nucleotides regarding the genome (ORF\_size / genome\_size)

Histogram

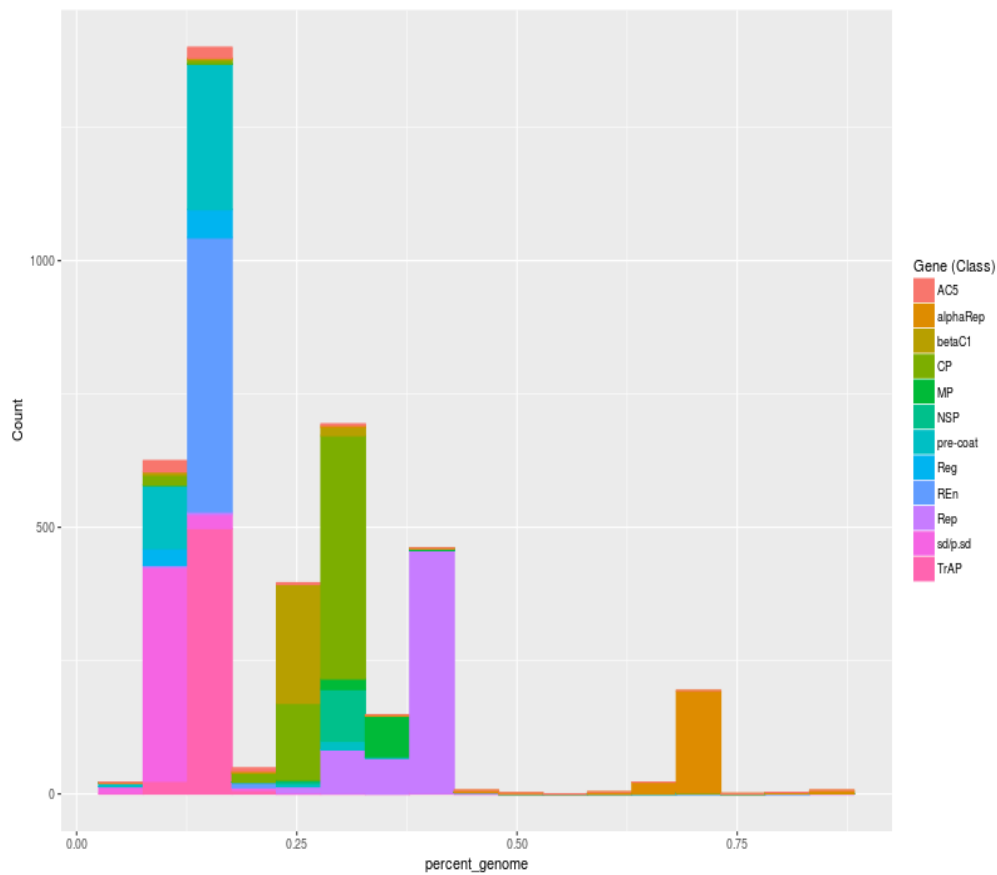

Density

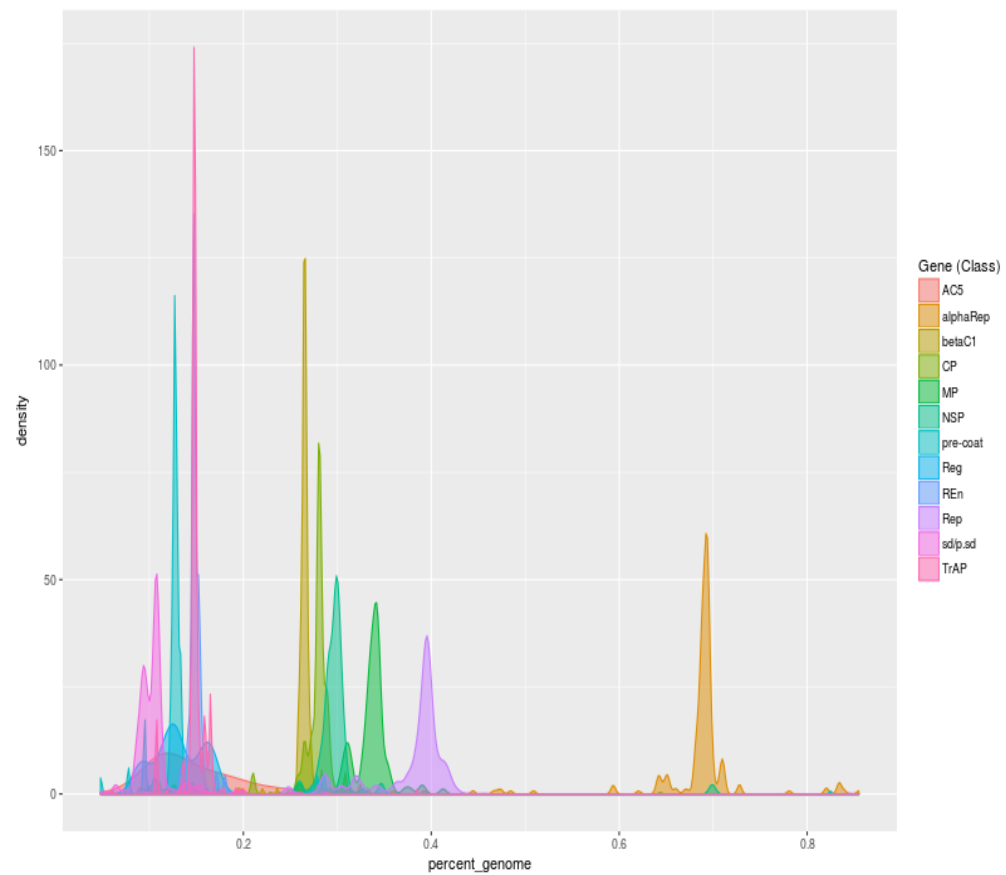

Boxplots

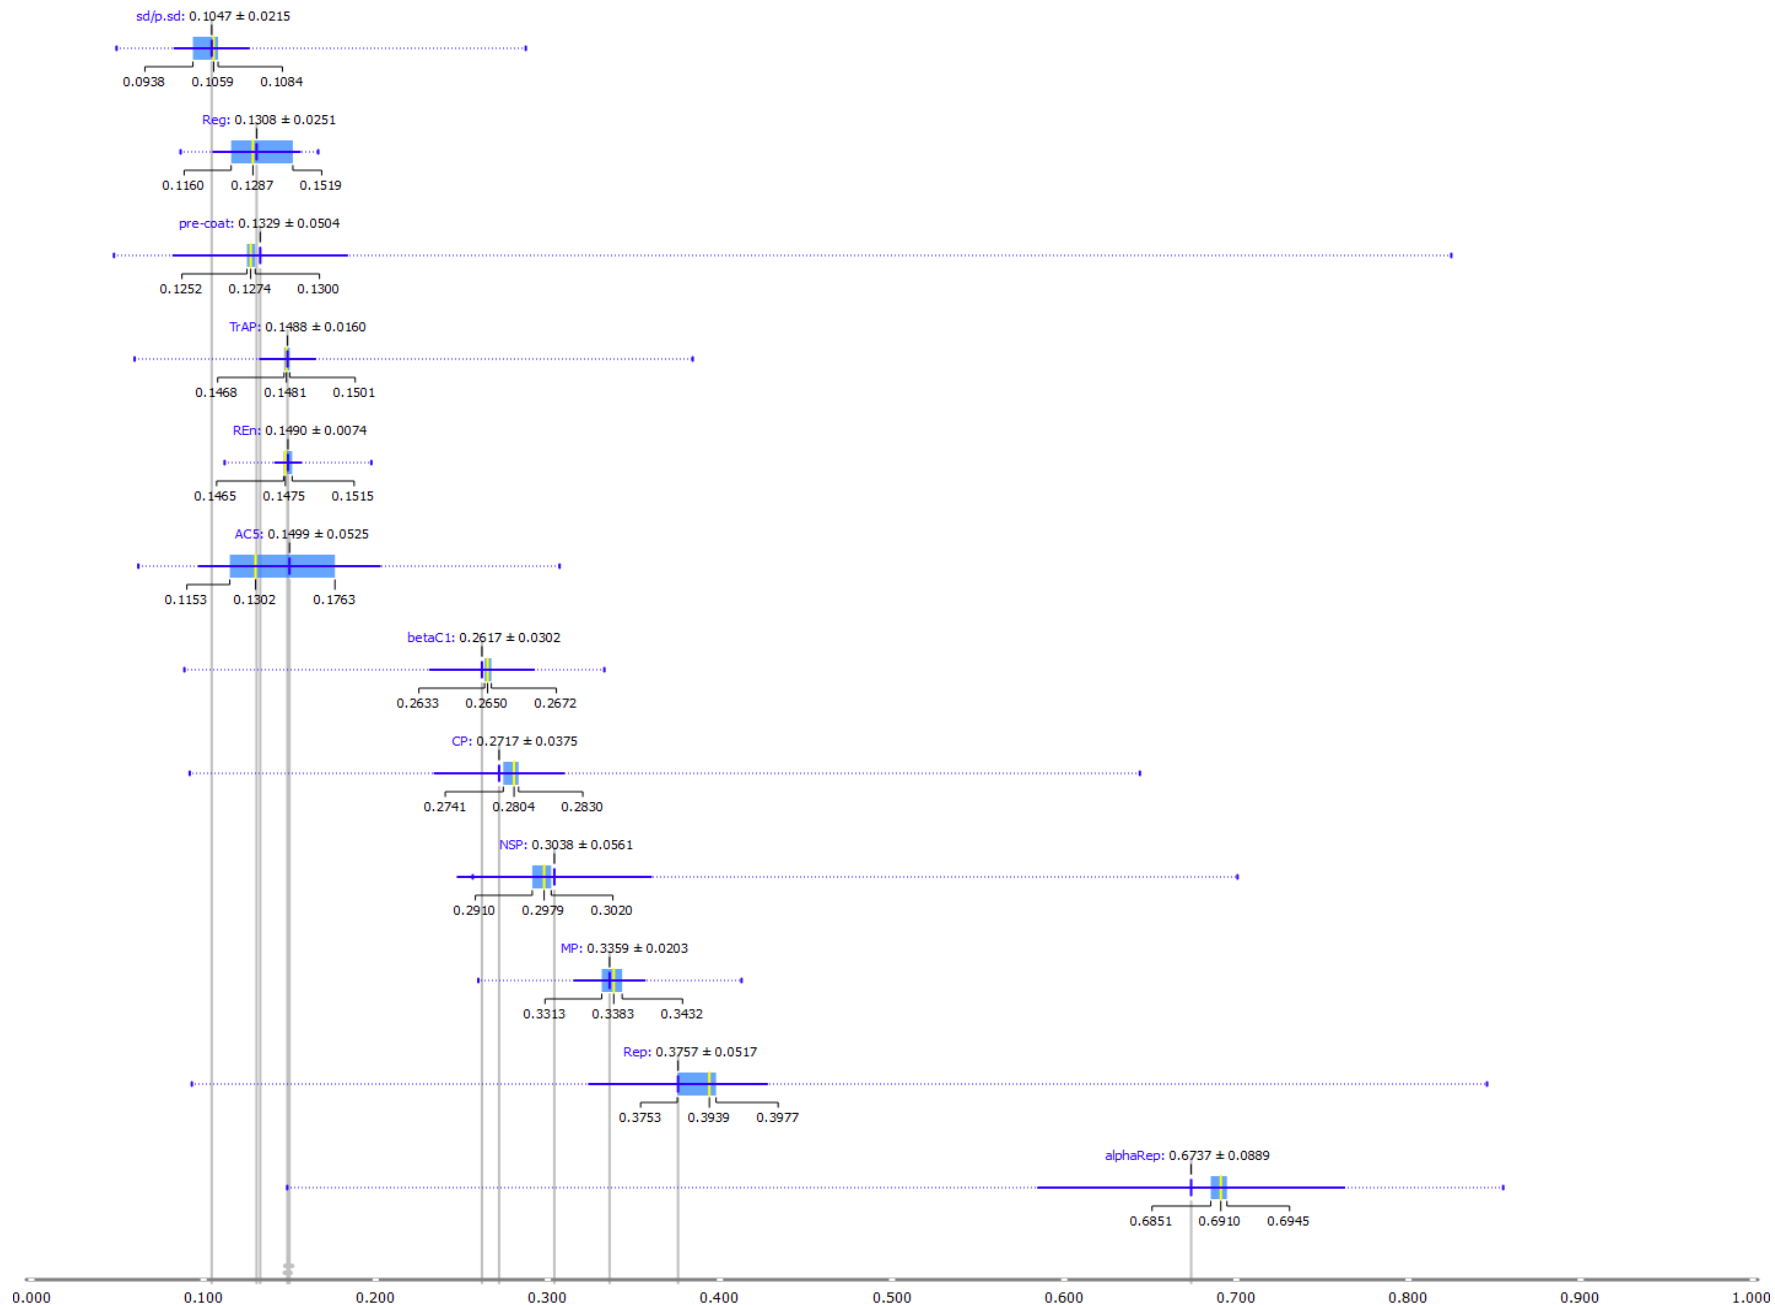

# Proportion of Thymine

## Histogram

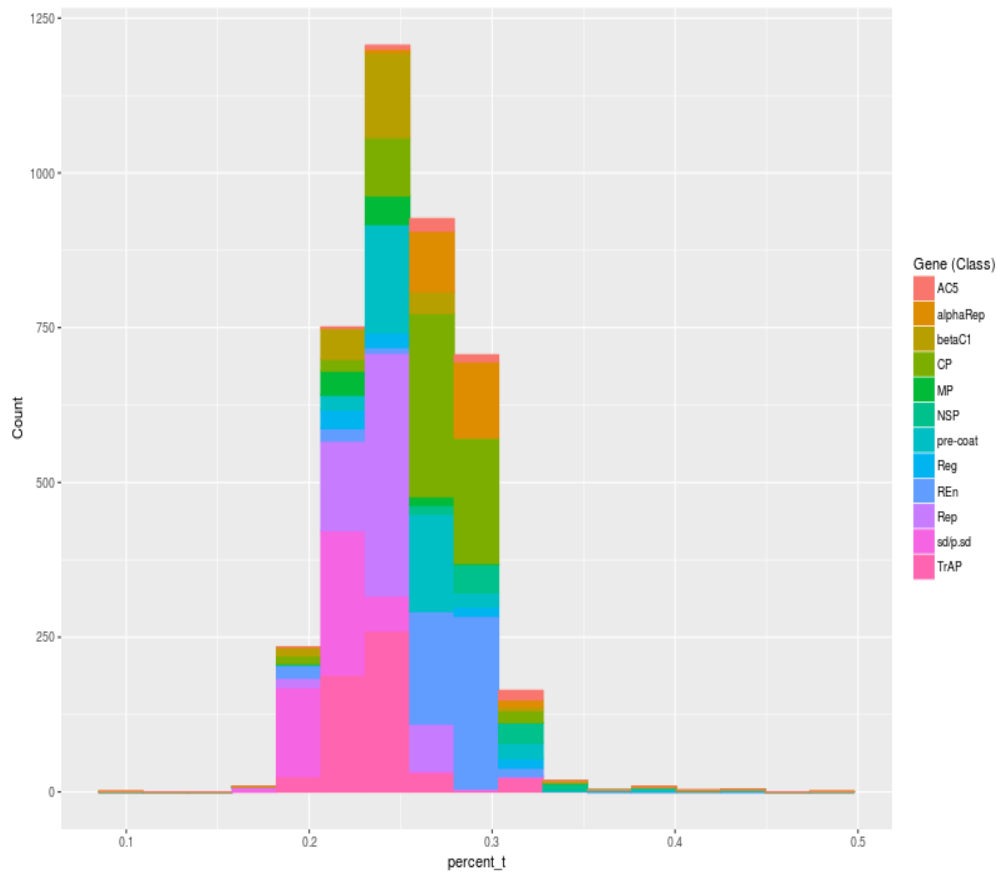

## Density

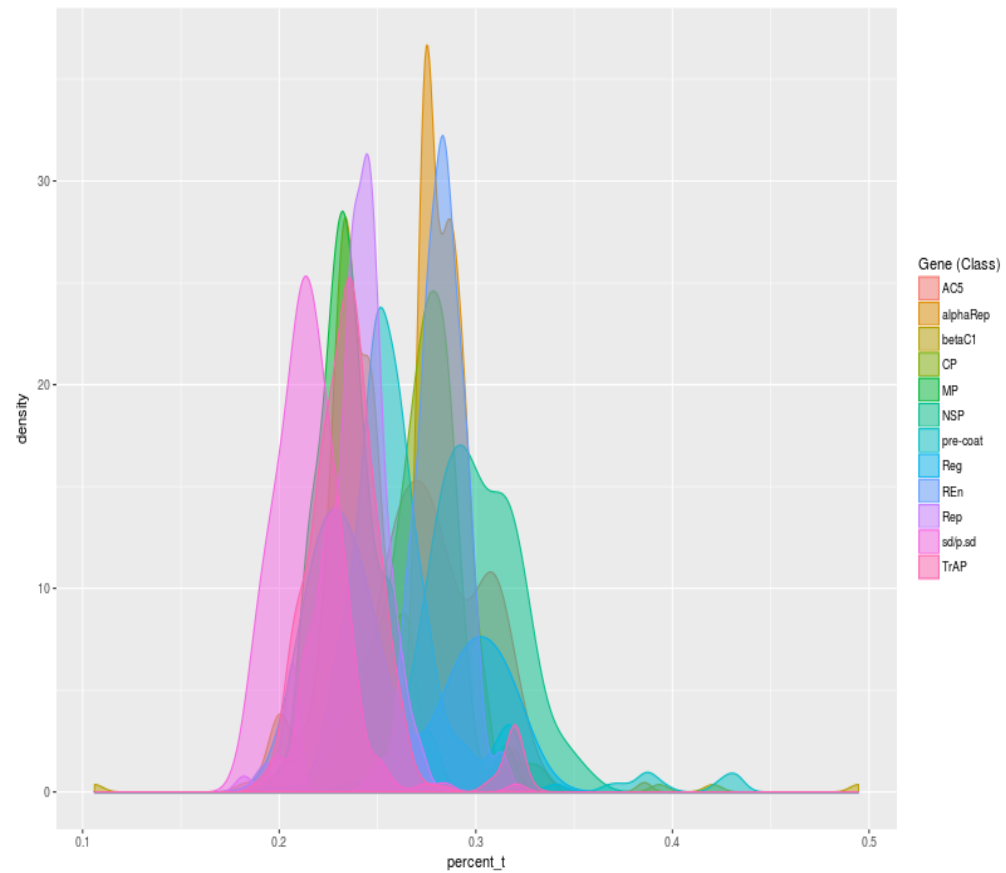



Boxplots

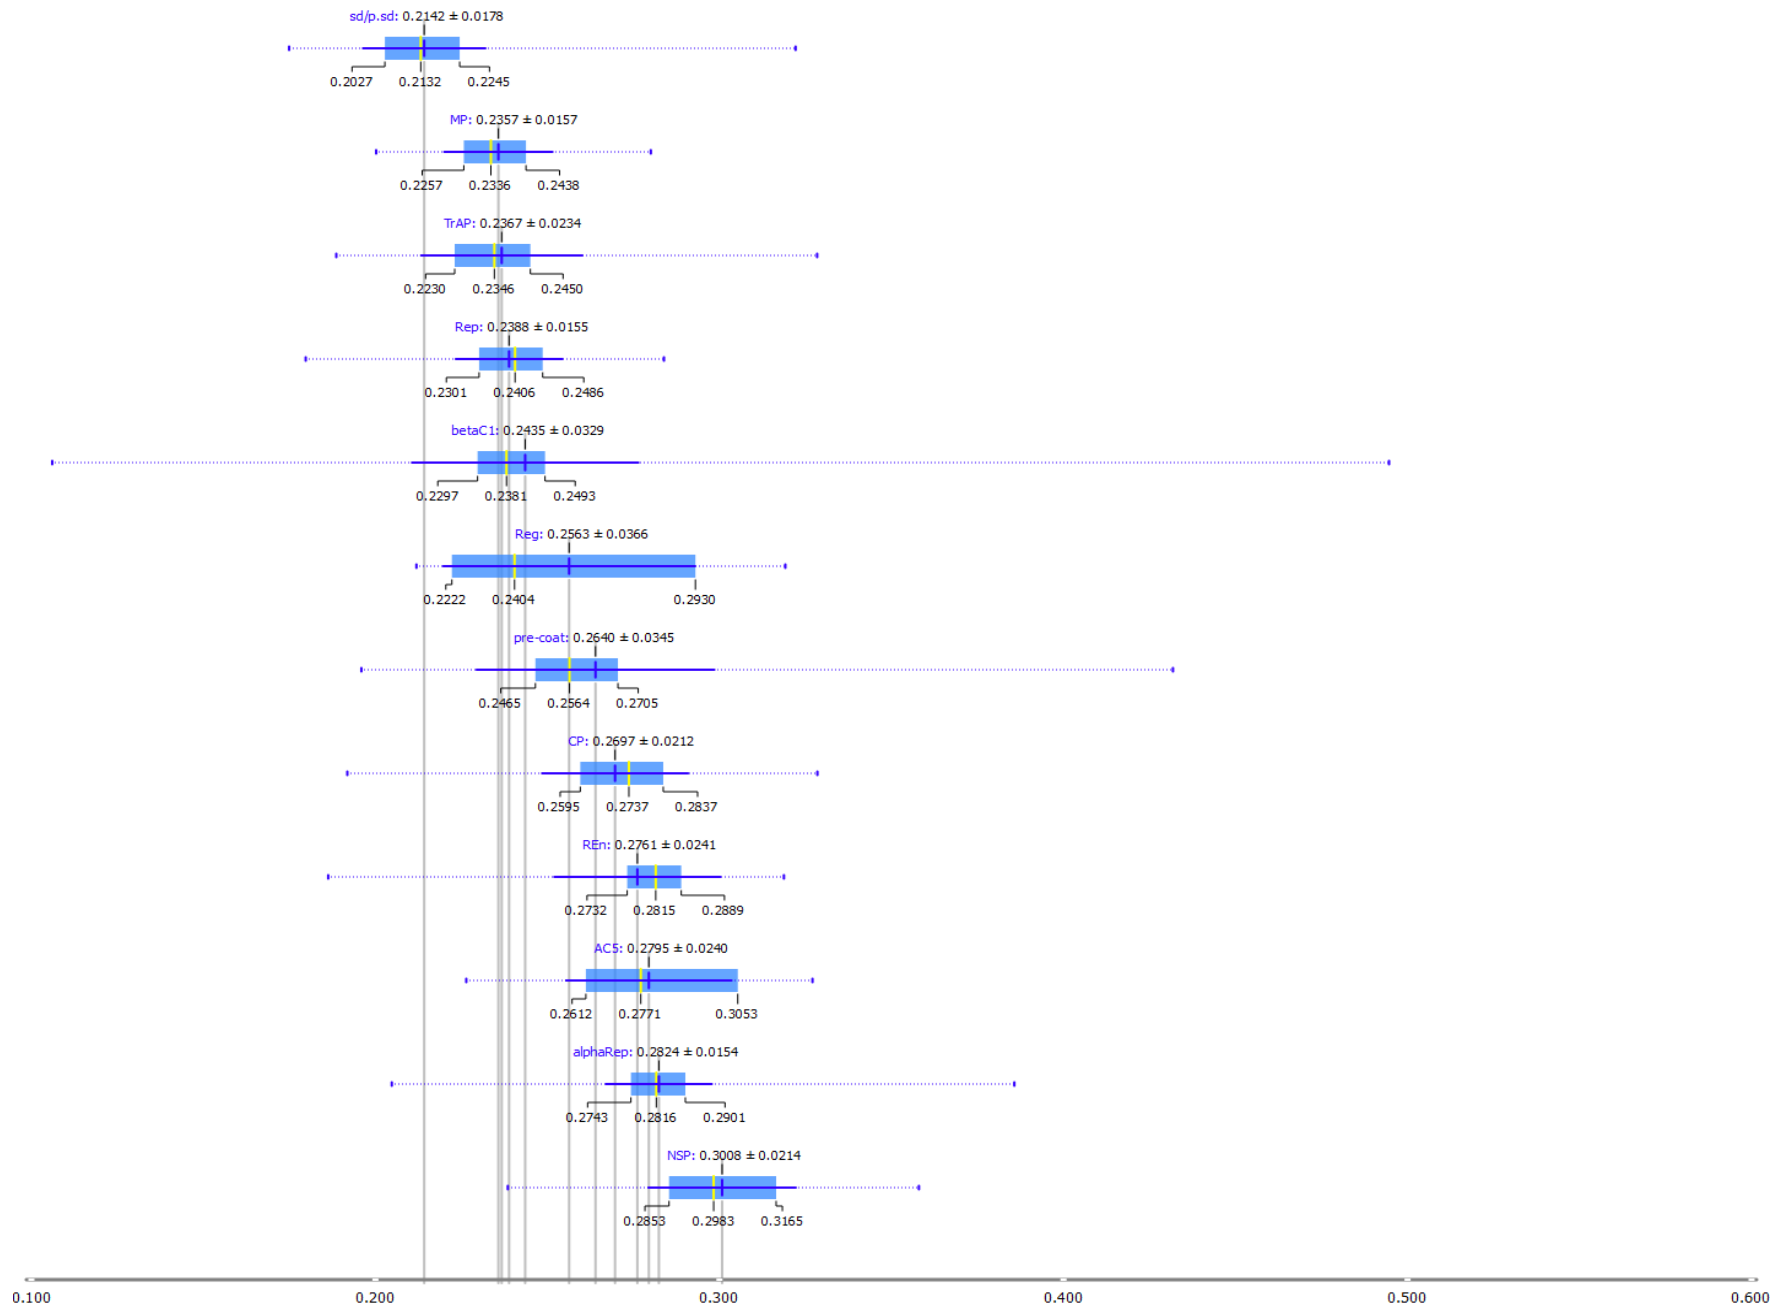

## Proportion of Thymine in region 1

Histogram

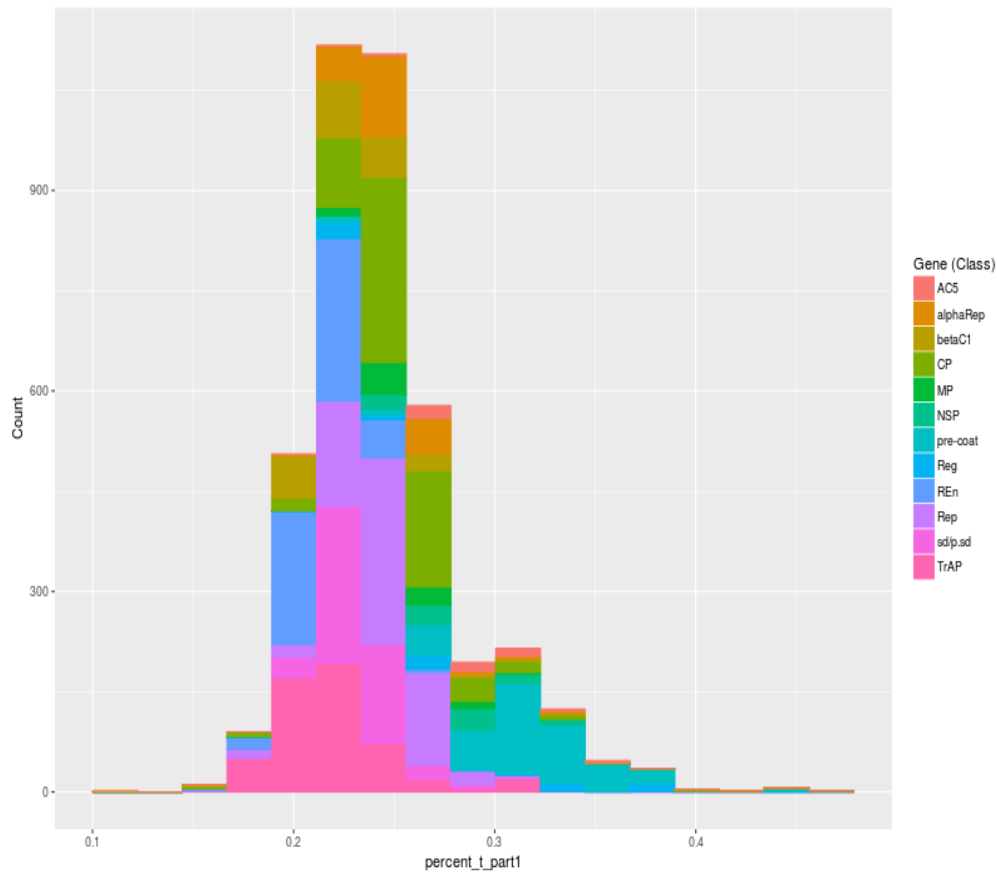

Density

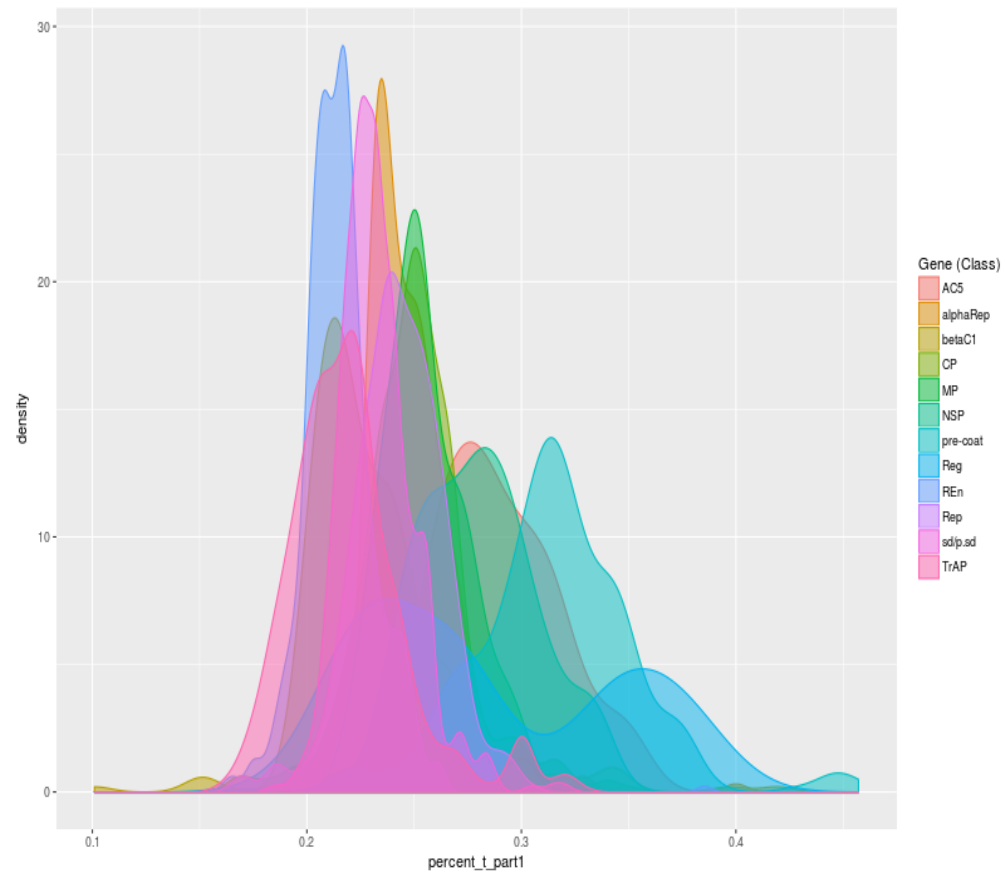

Boxplots

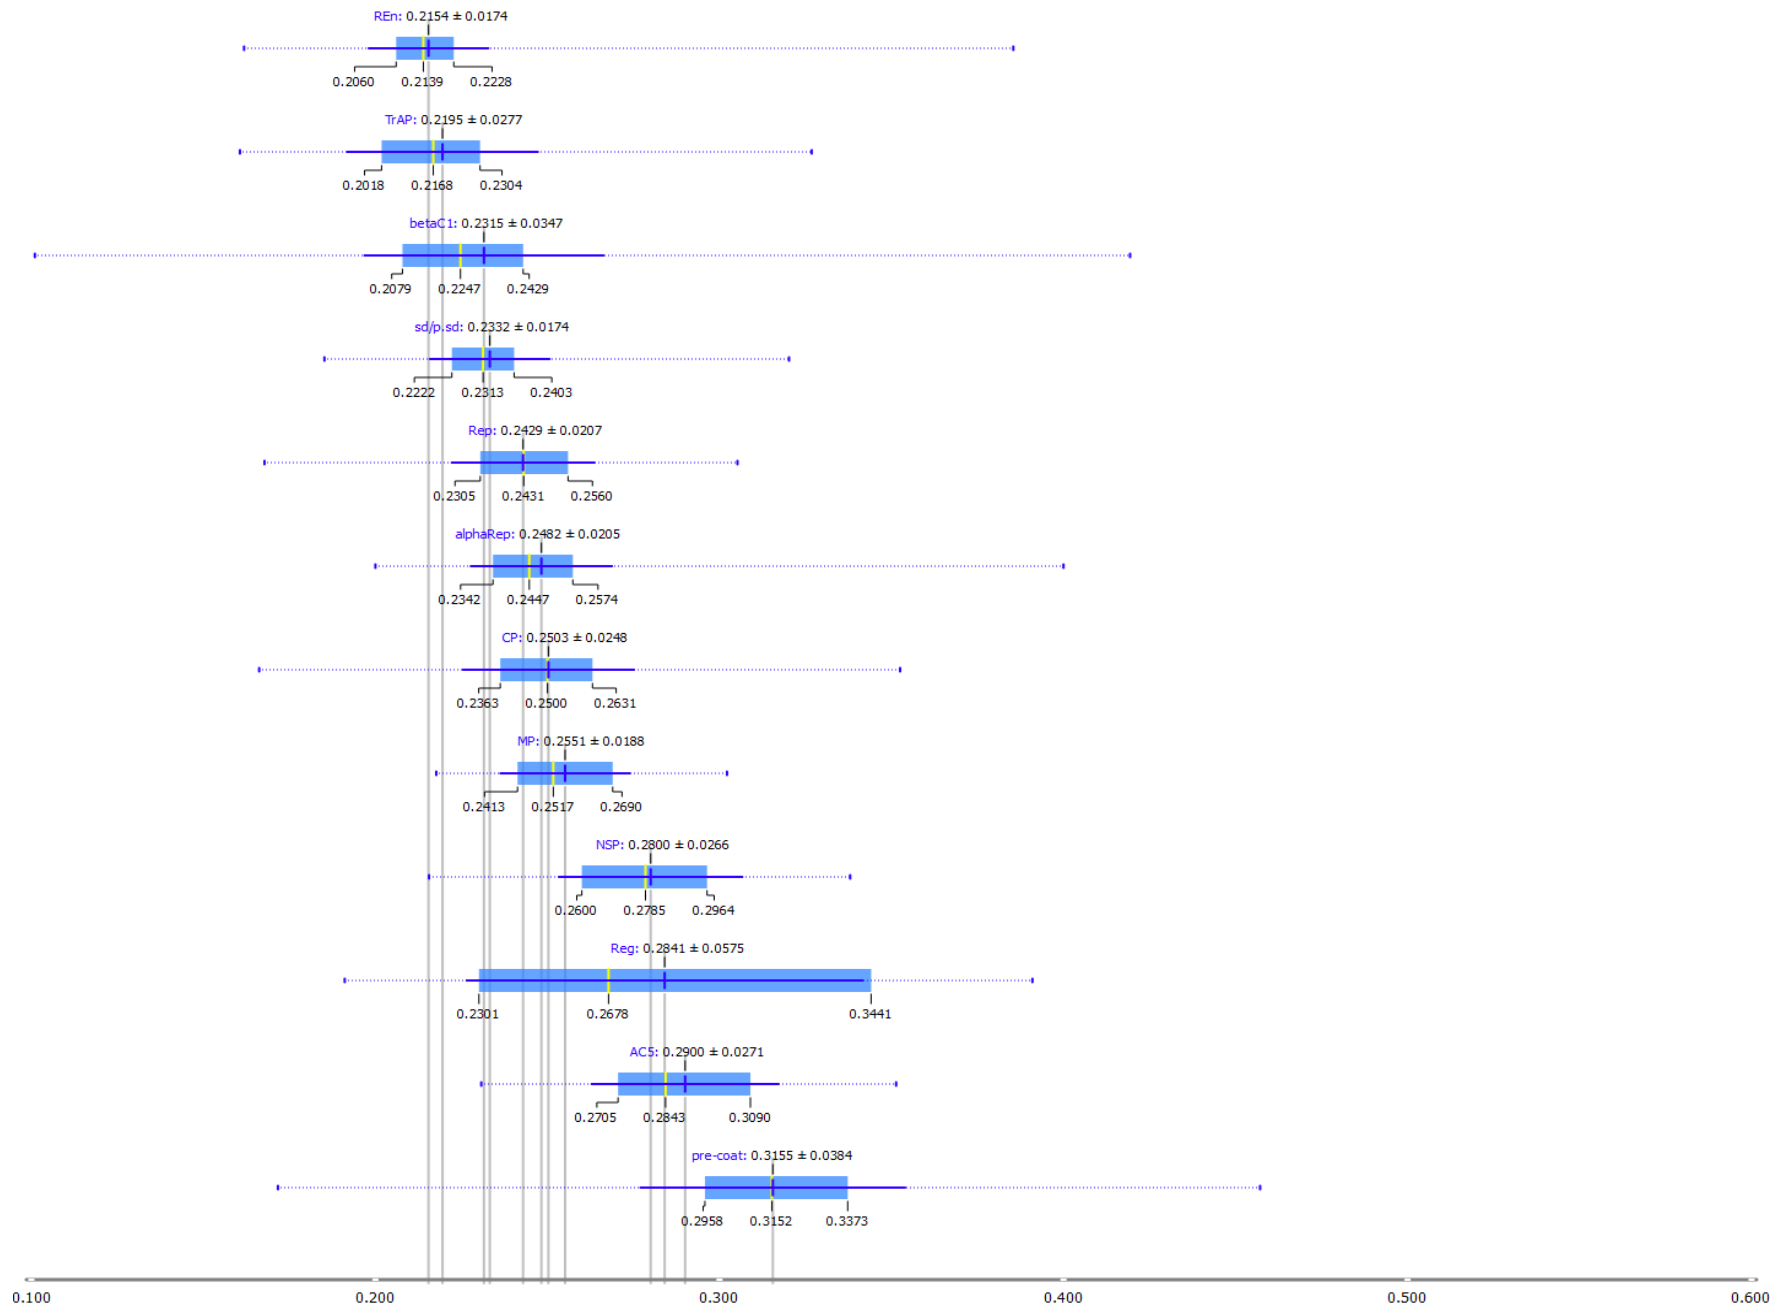

## Proportion of Thymine in region 2

Histogram

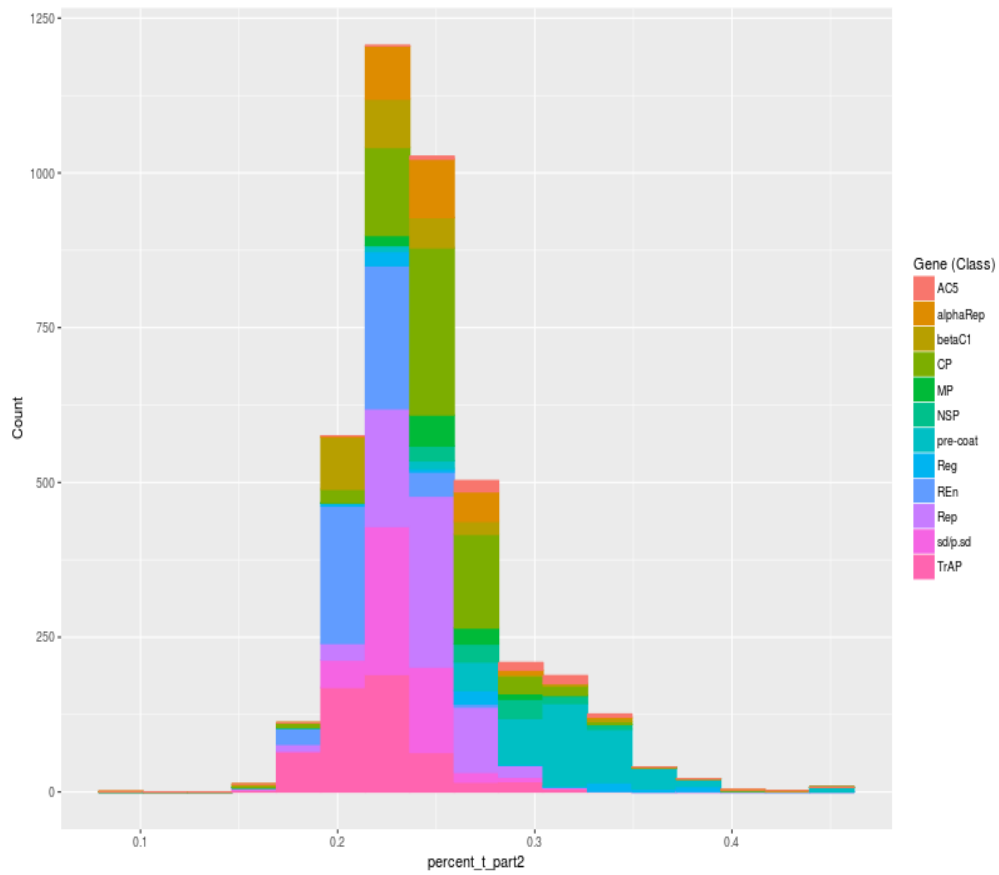

Density

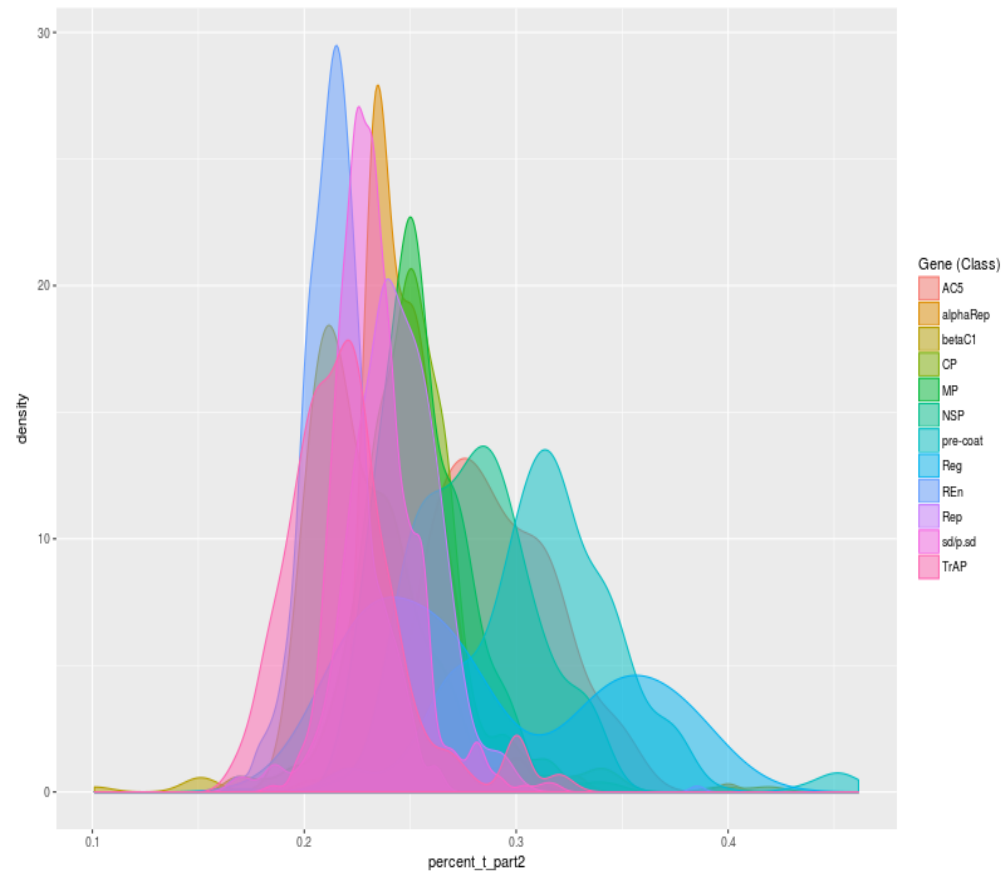

Boxplots

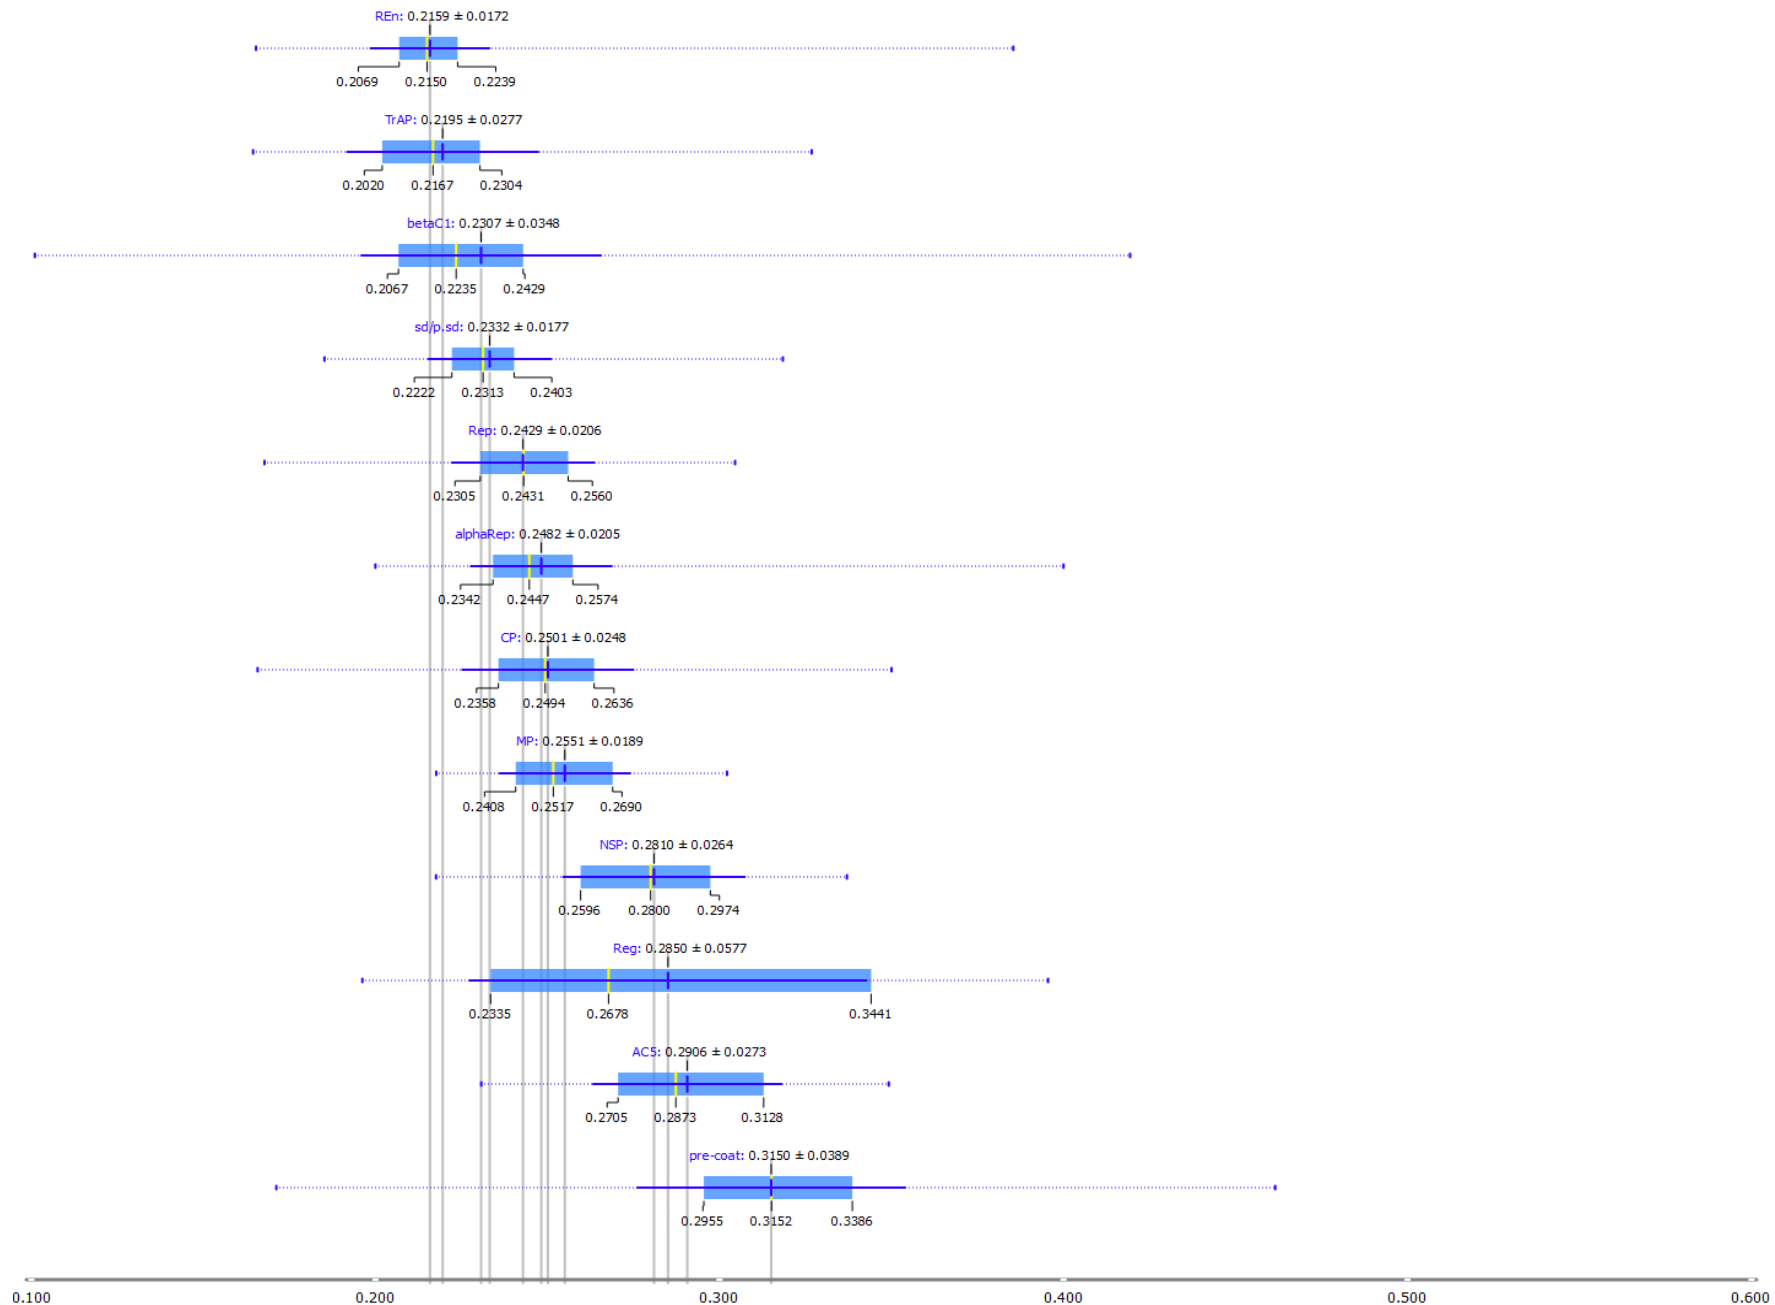

## Proportion of Phenylalanine

Histogram

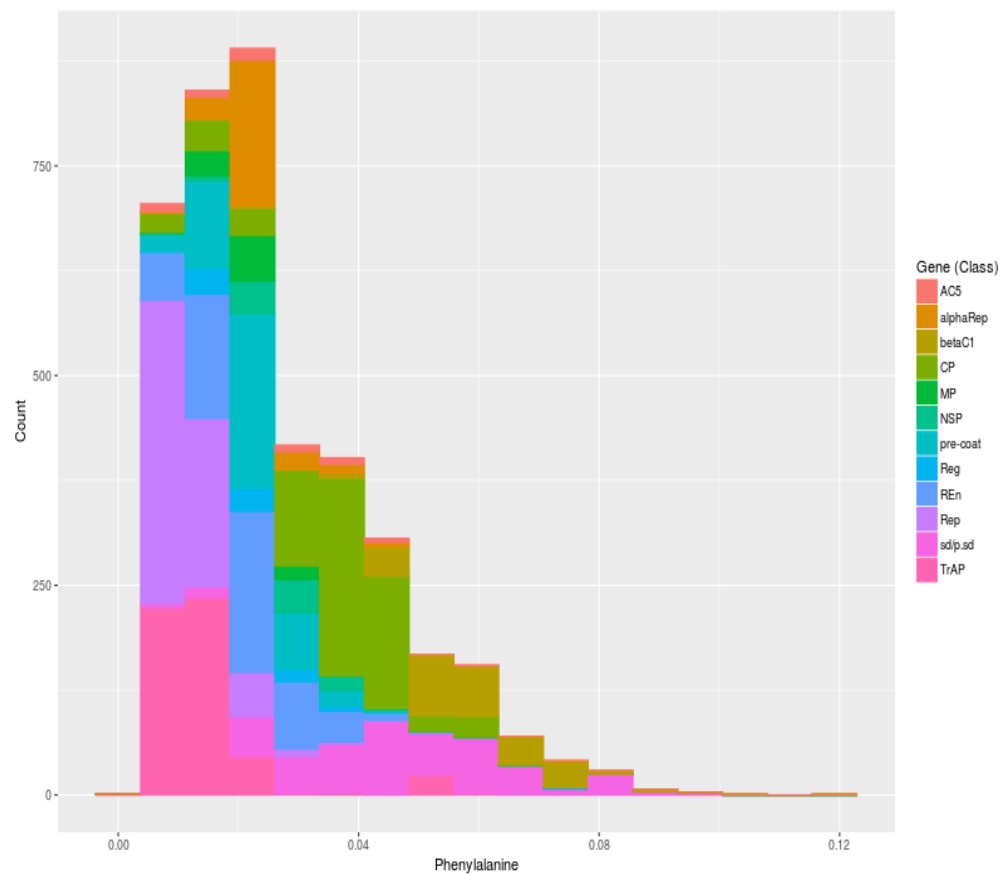

Density

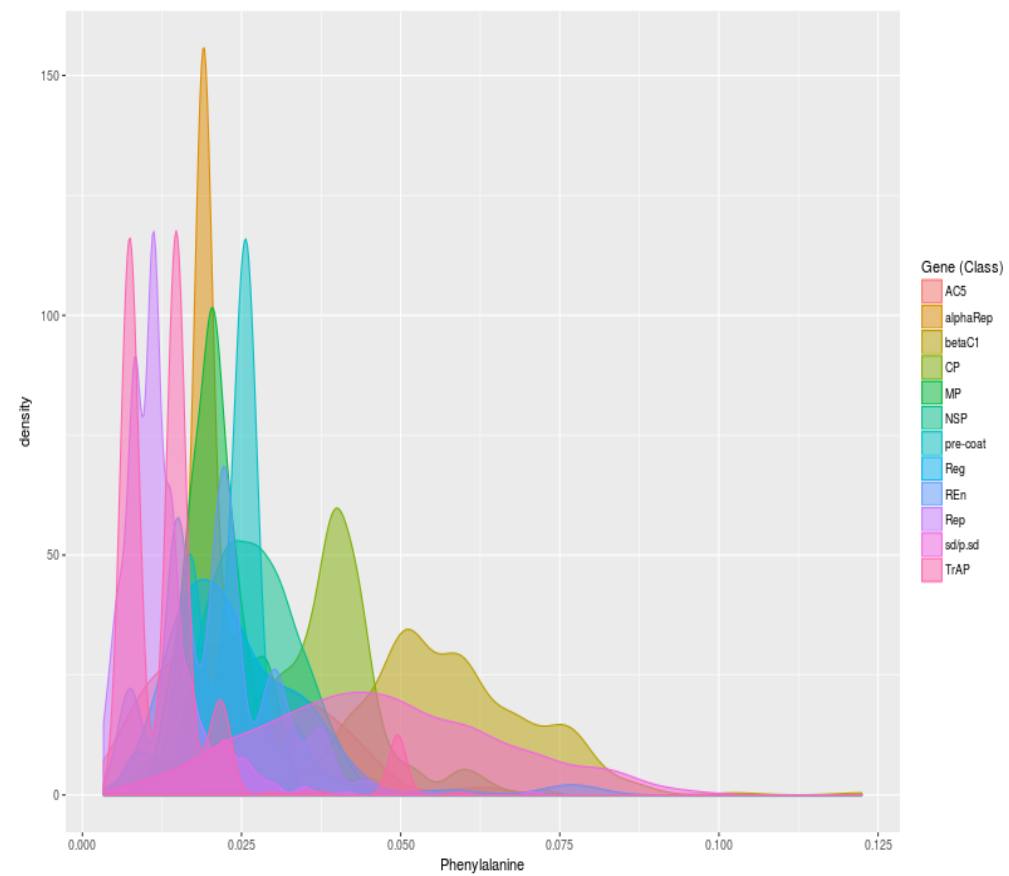

Boxplots

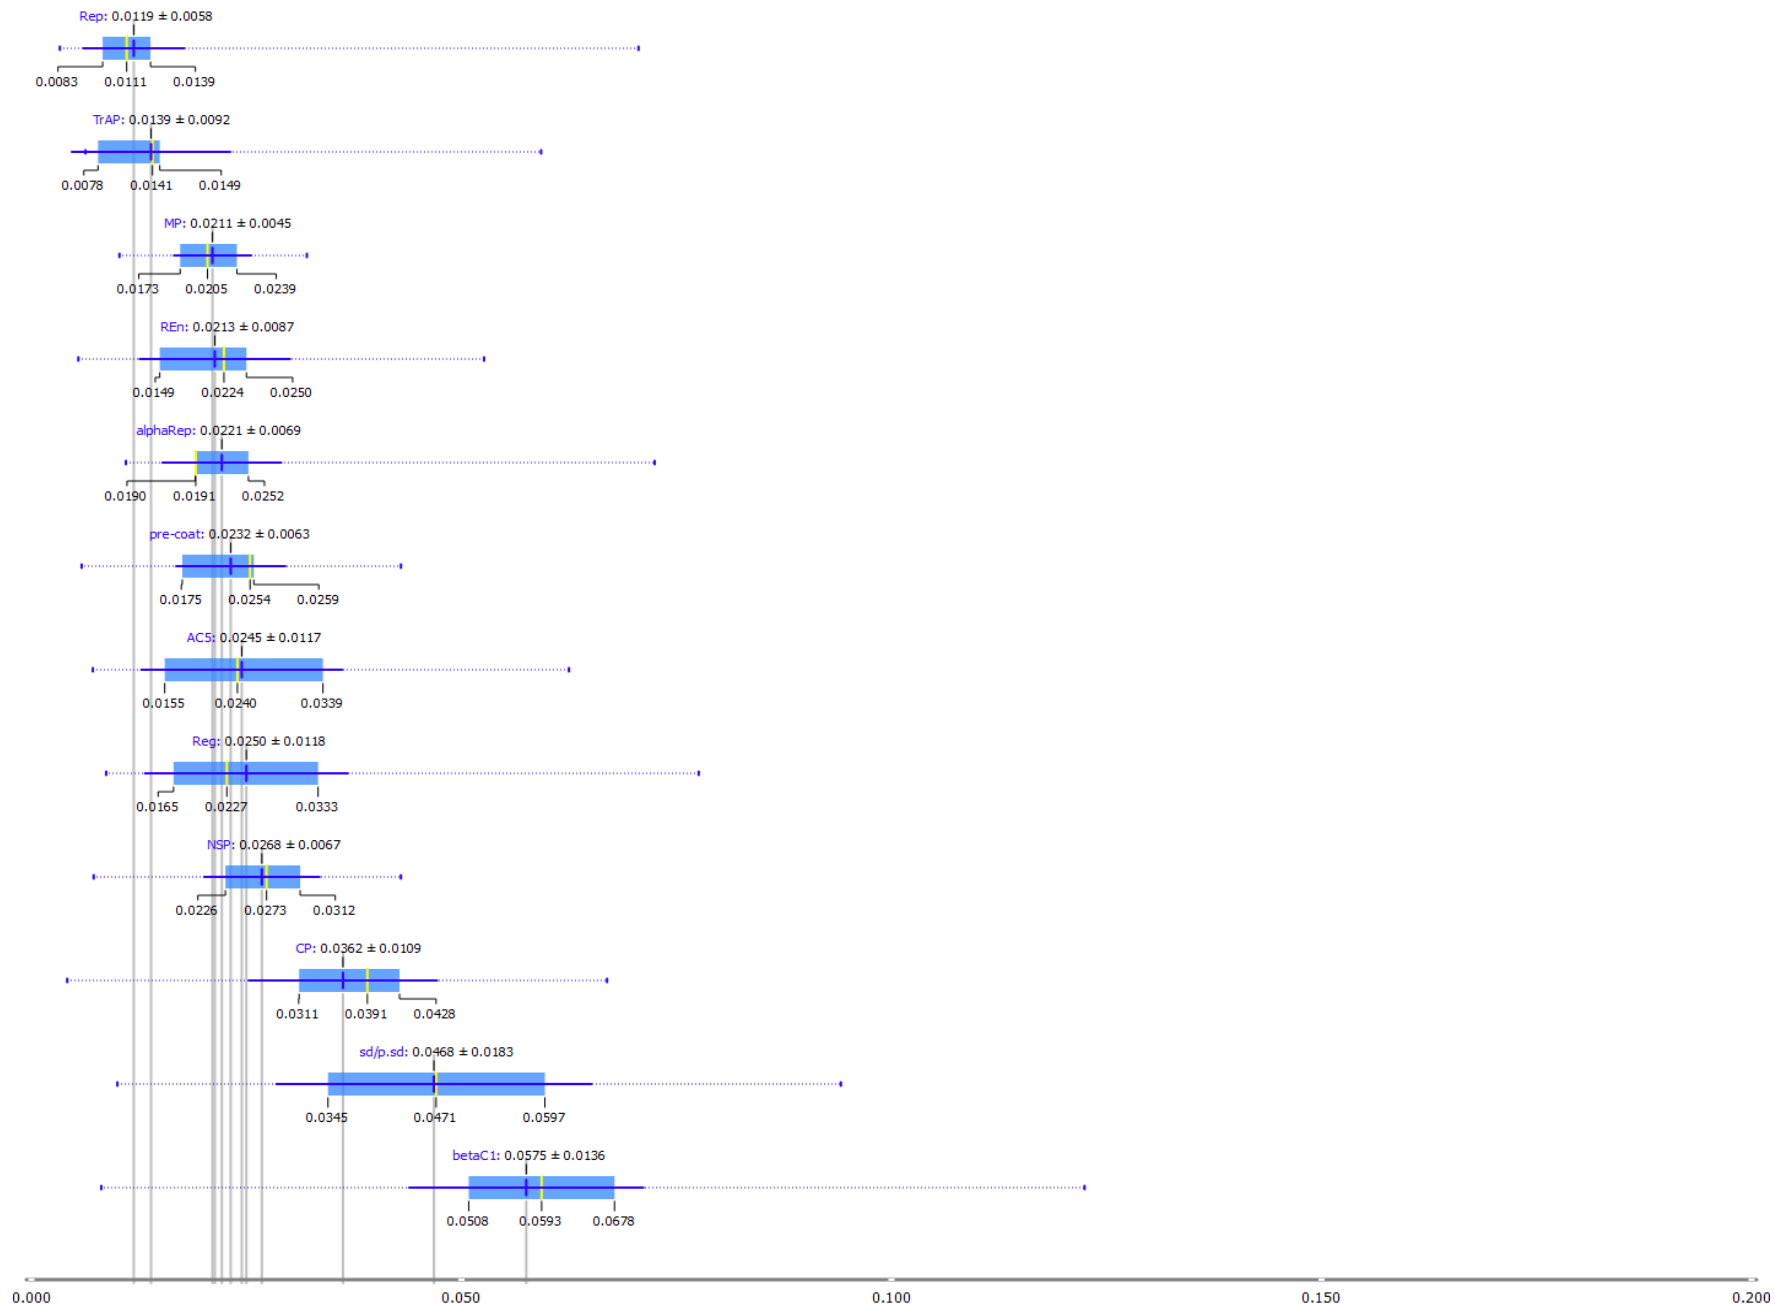

## Proportion of Proline

Histogram

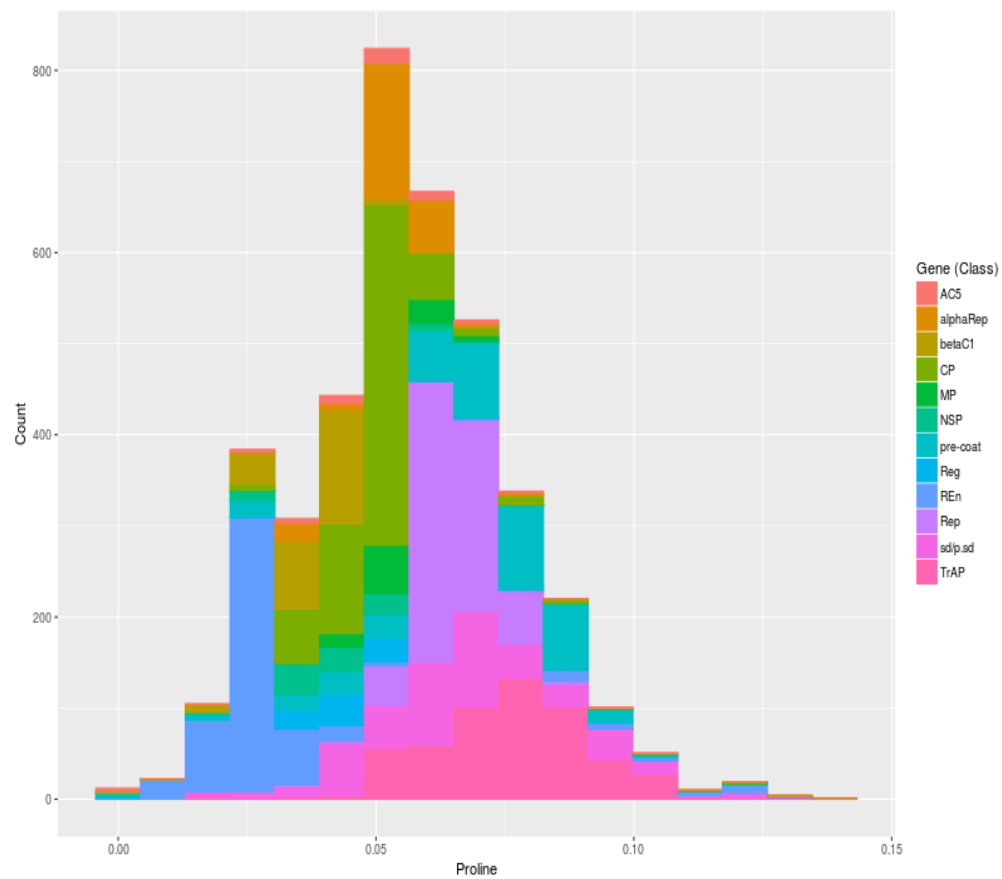

Density

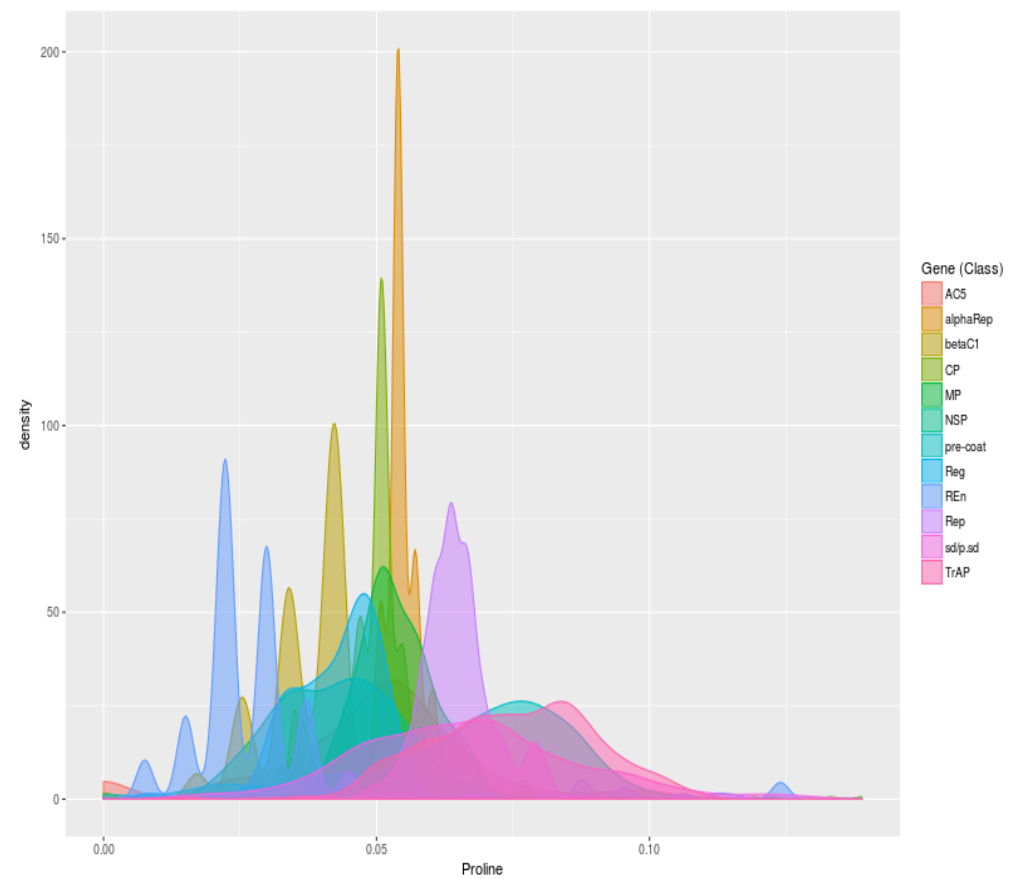



Boxplots

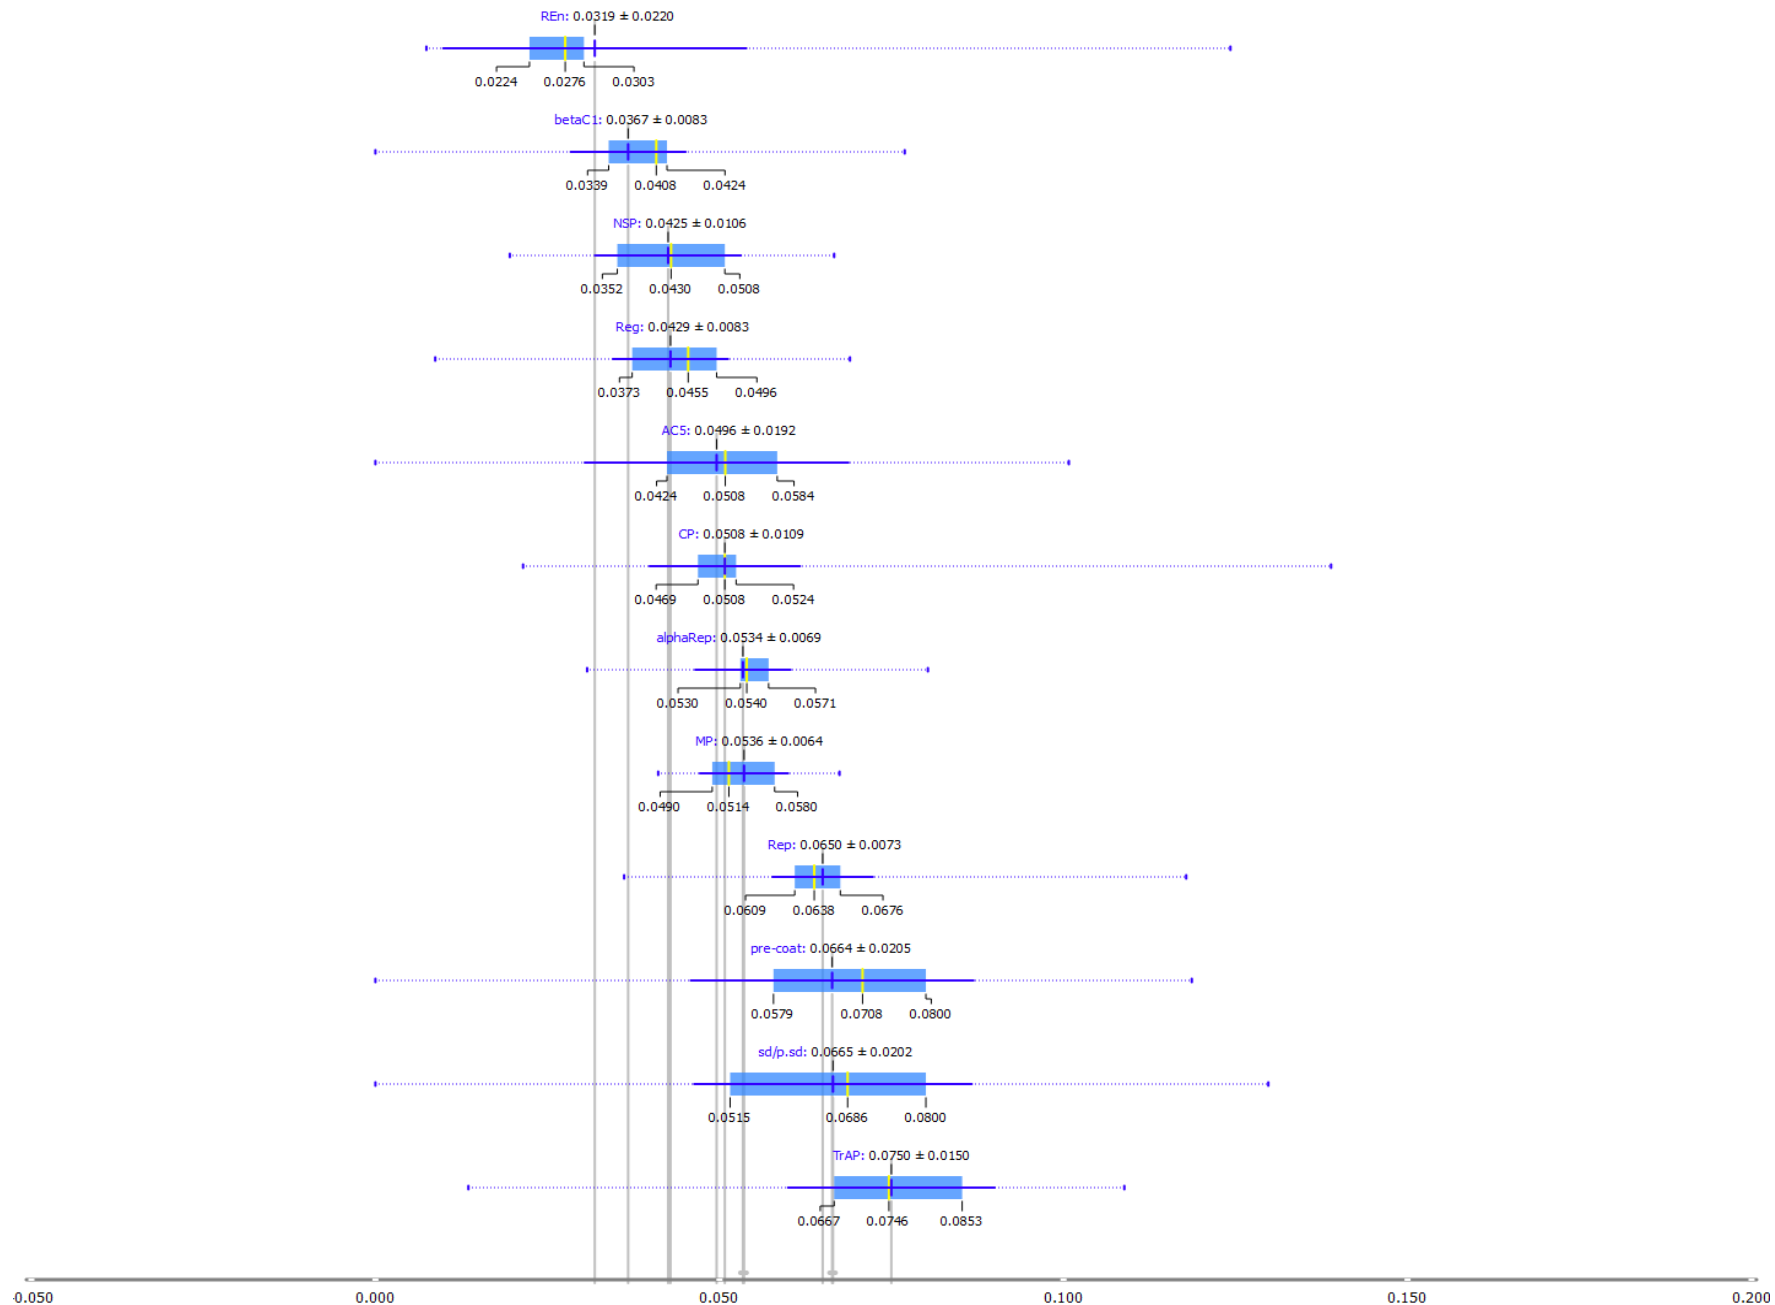

## Proportion of Serine

Histogram

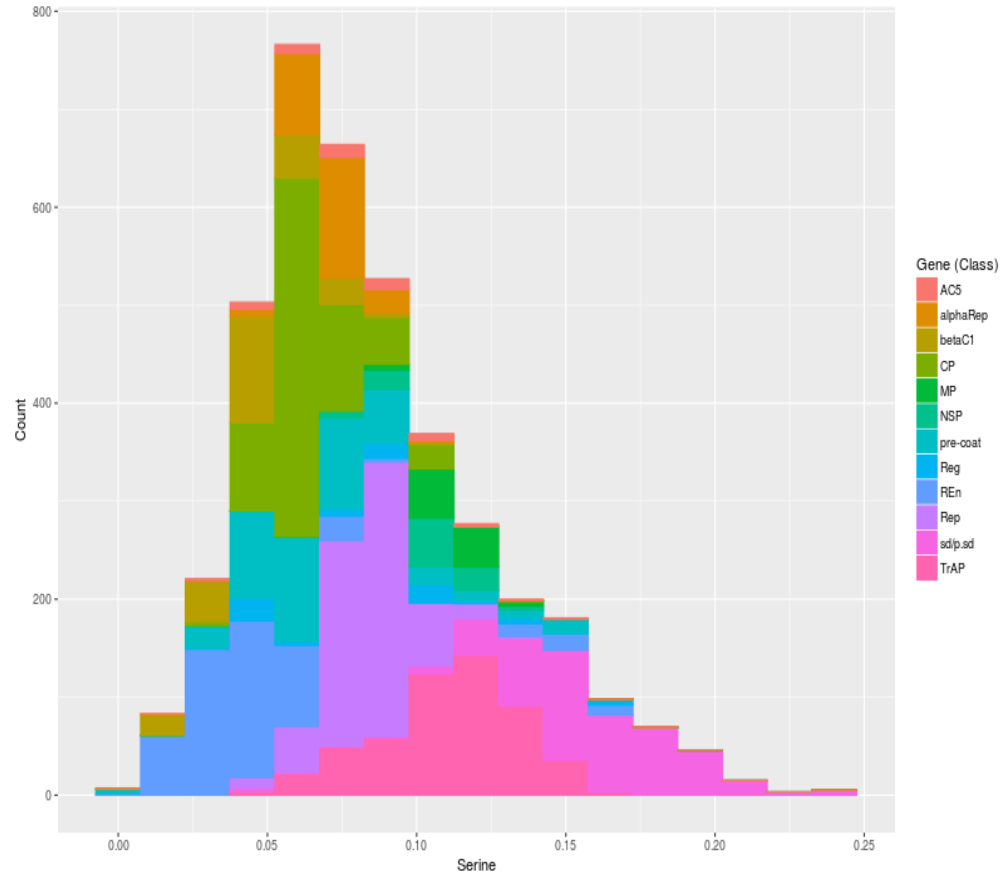

Density

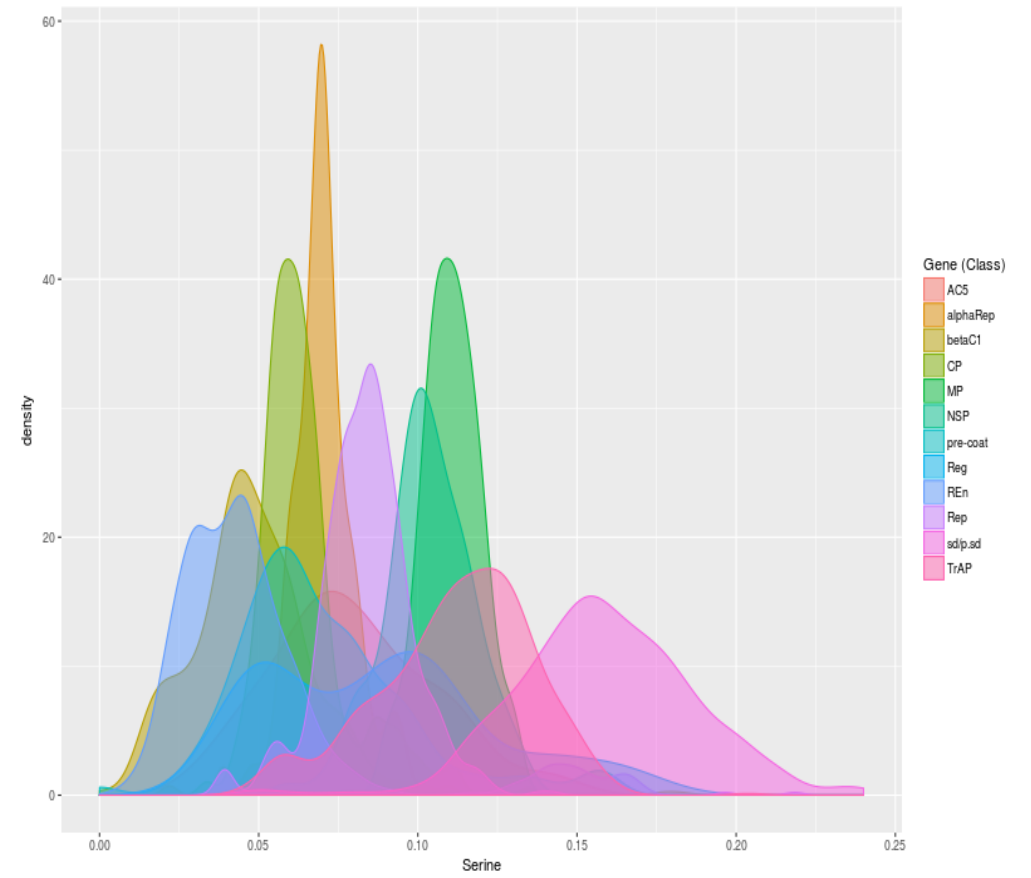

Boxplots

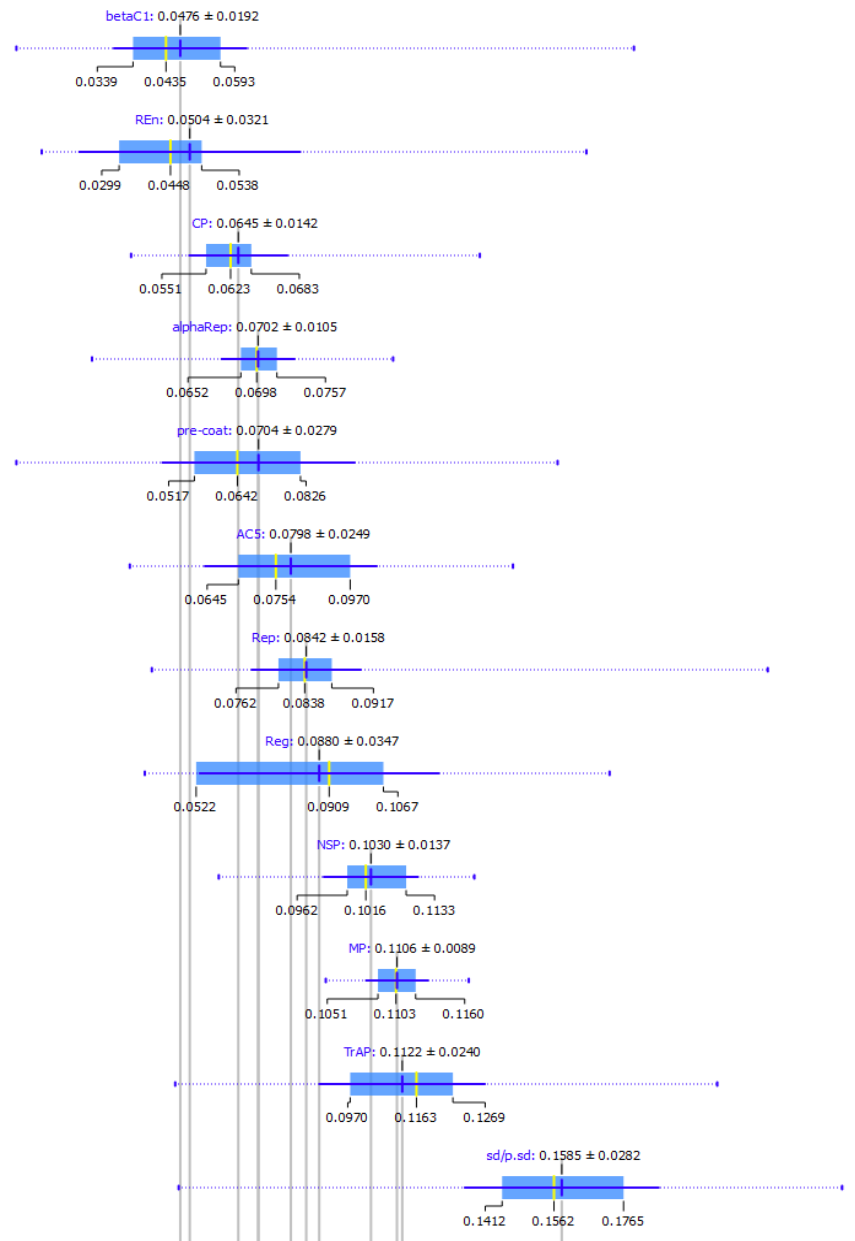

0.100                      0.000                      0.100                      0.200                      0.300                      0.400

# Proportion of Threonine

Histogram

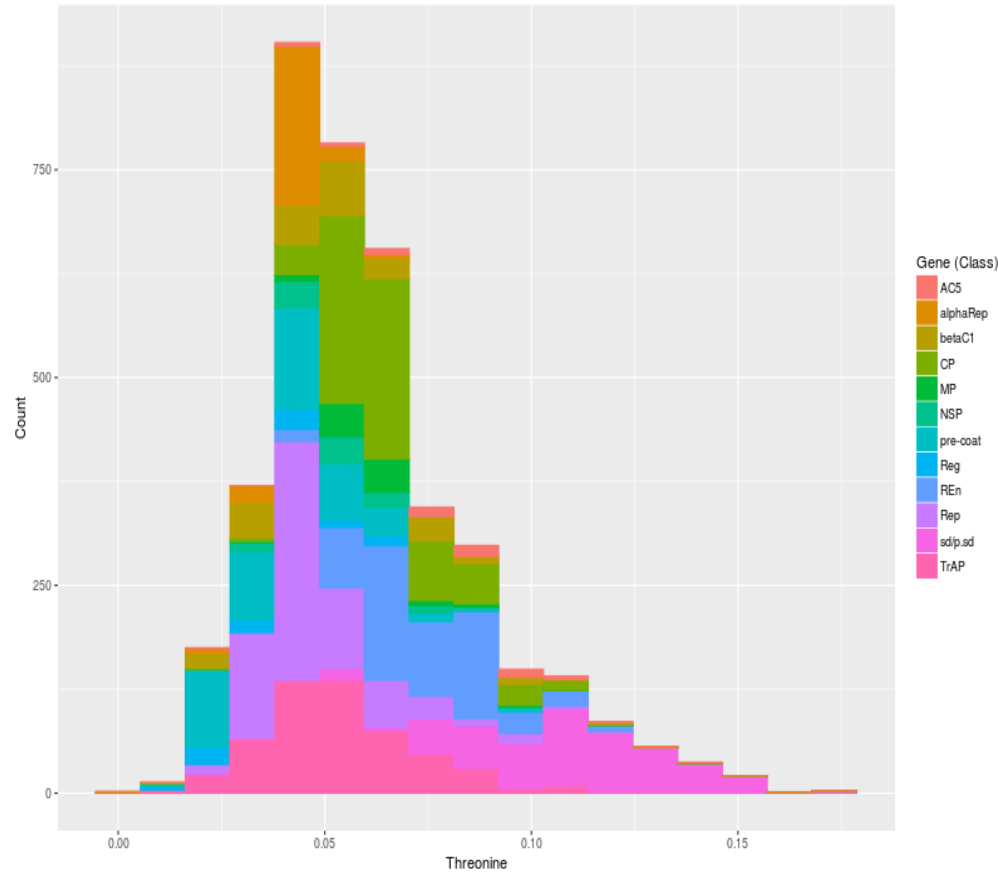

Density

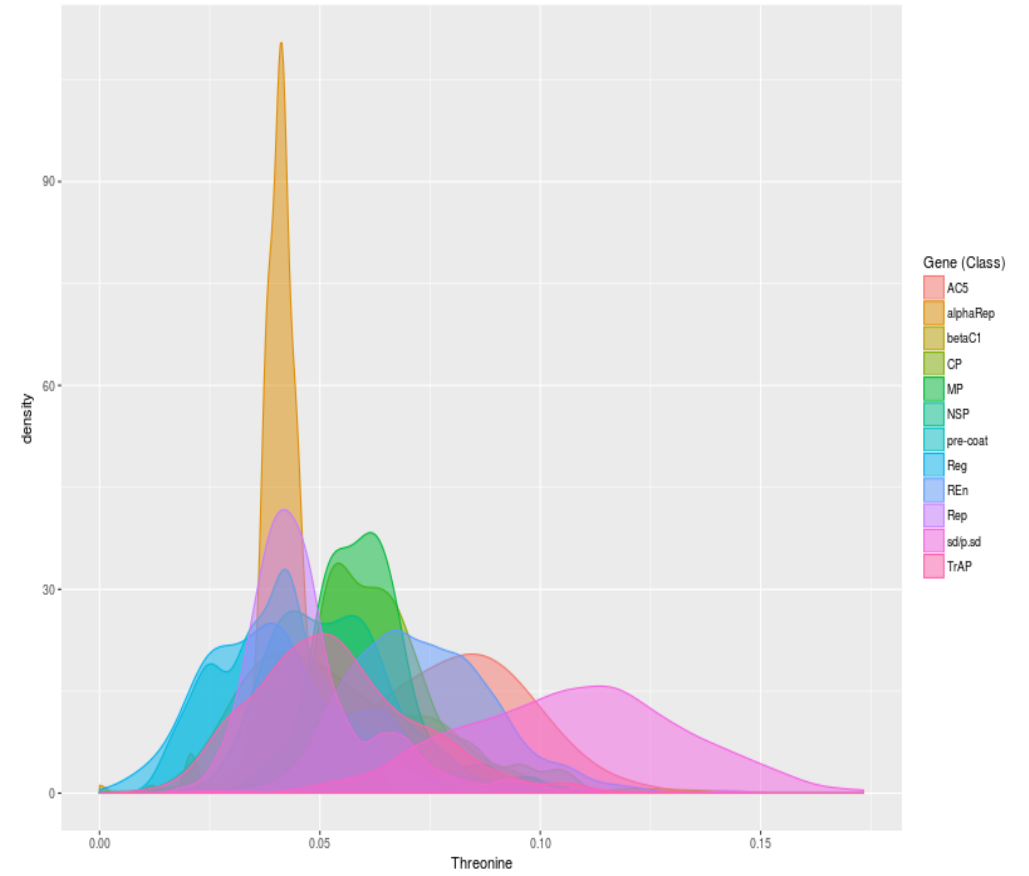

# Boxplots

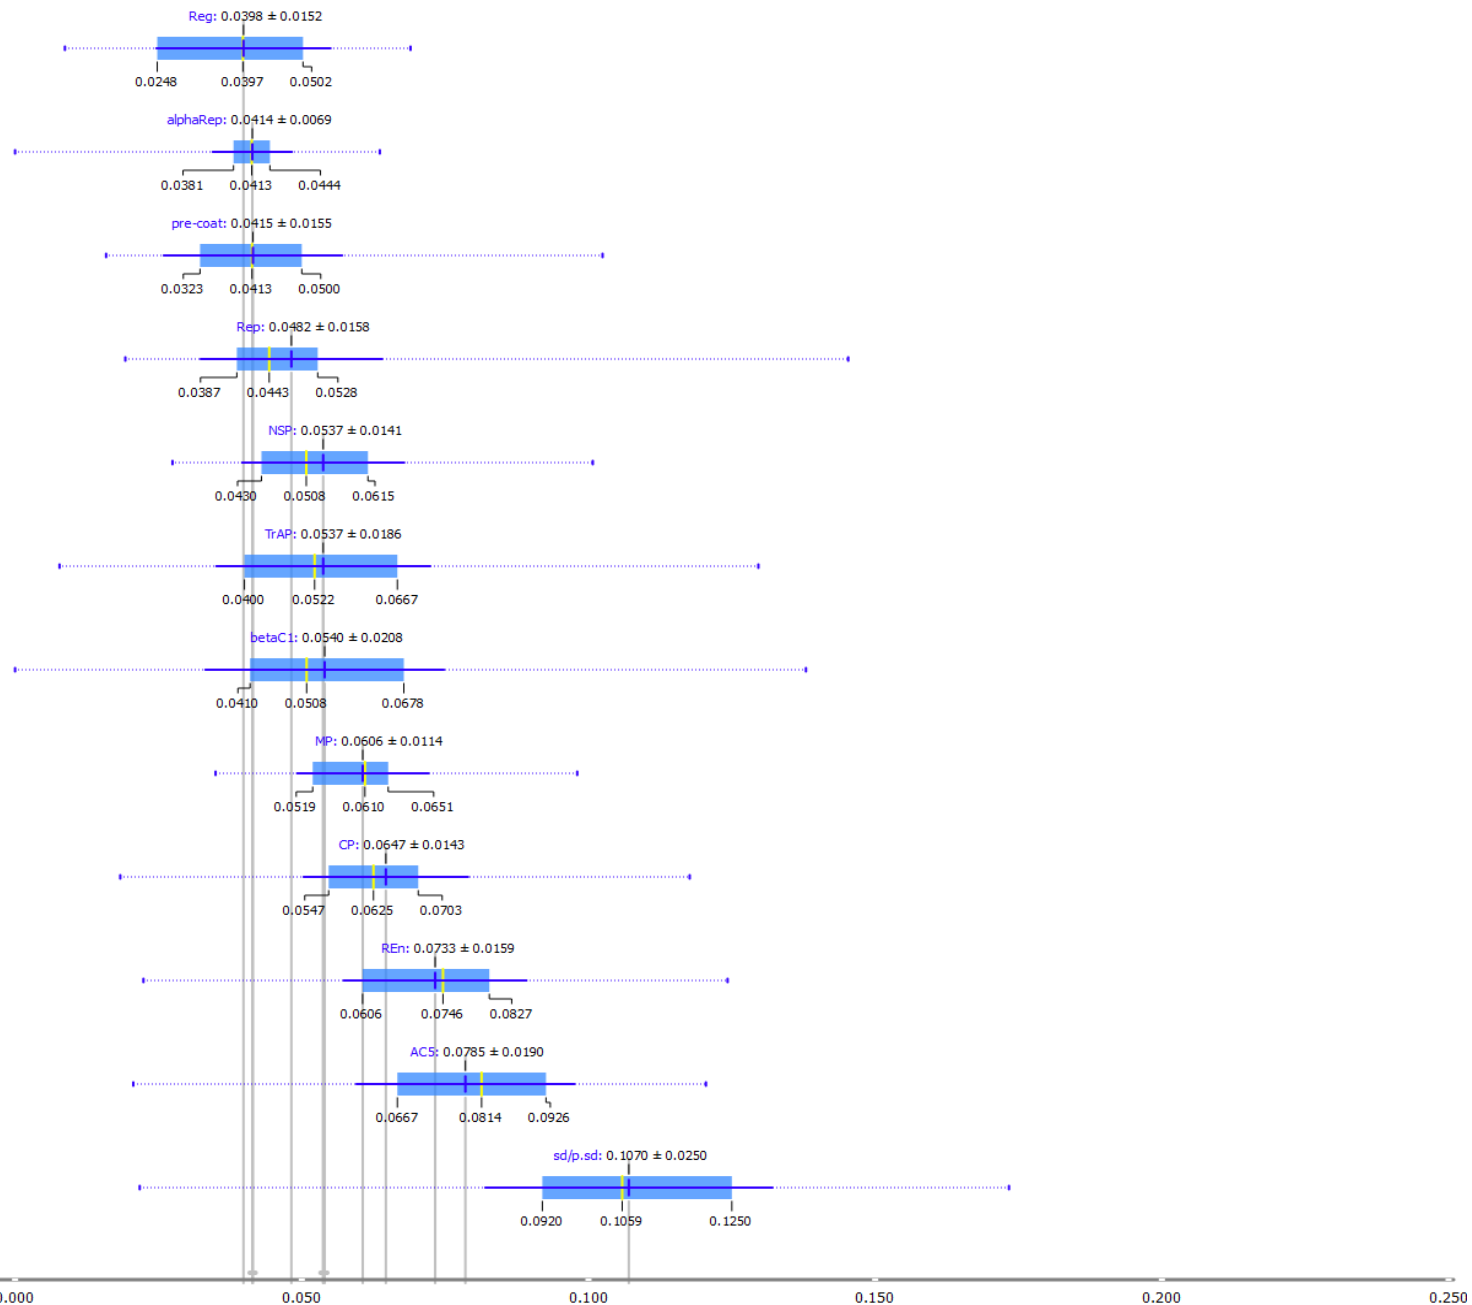

# Proportion of Tryptophan

Histogram

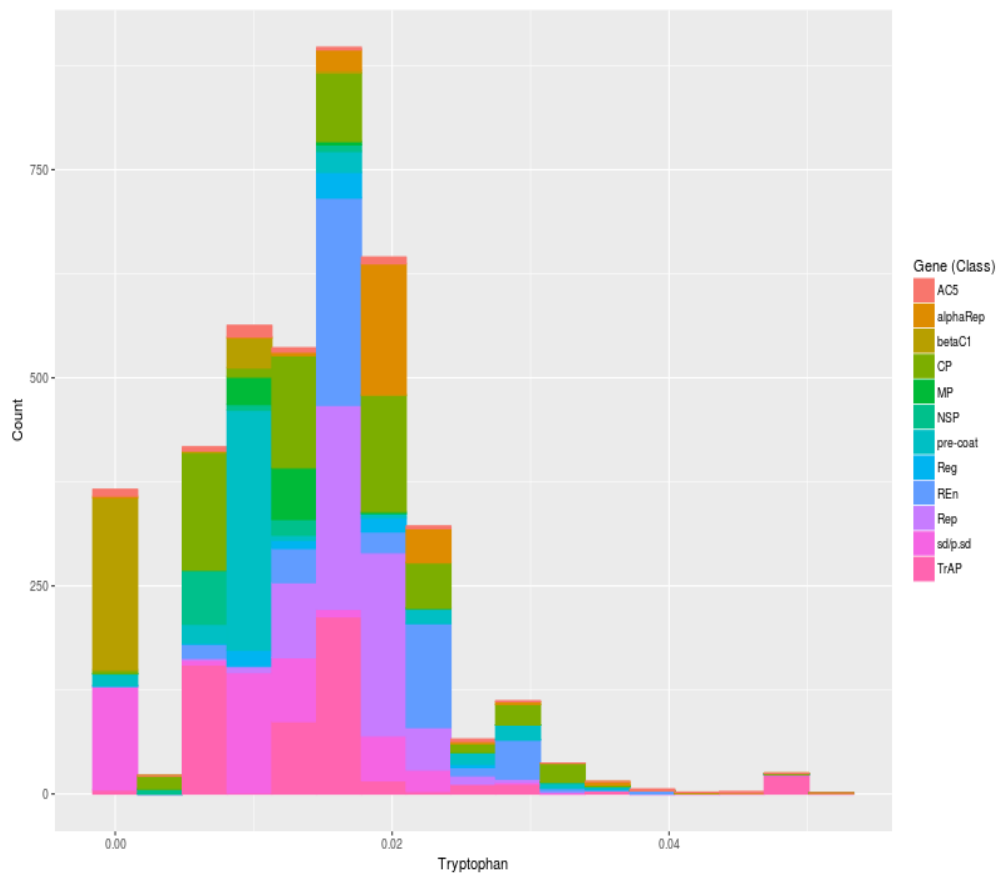

Density

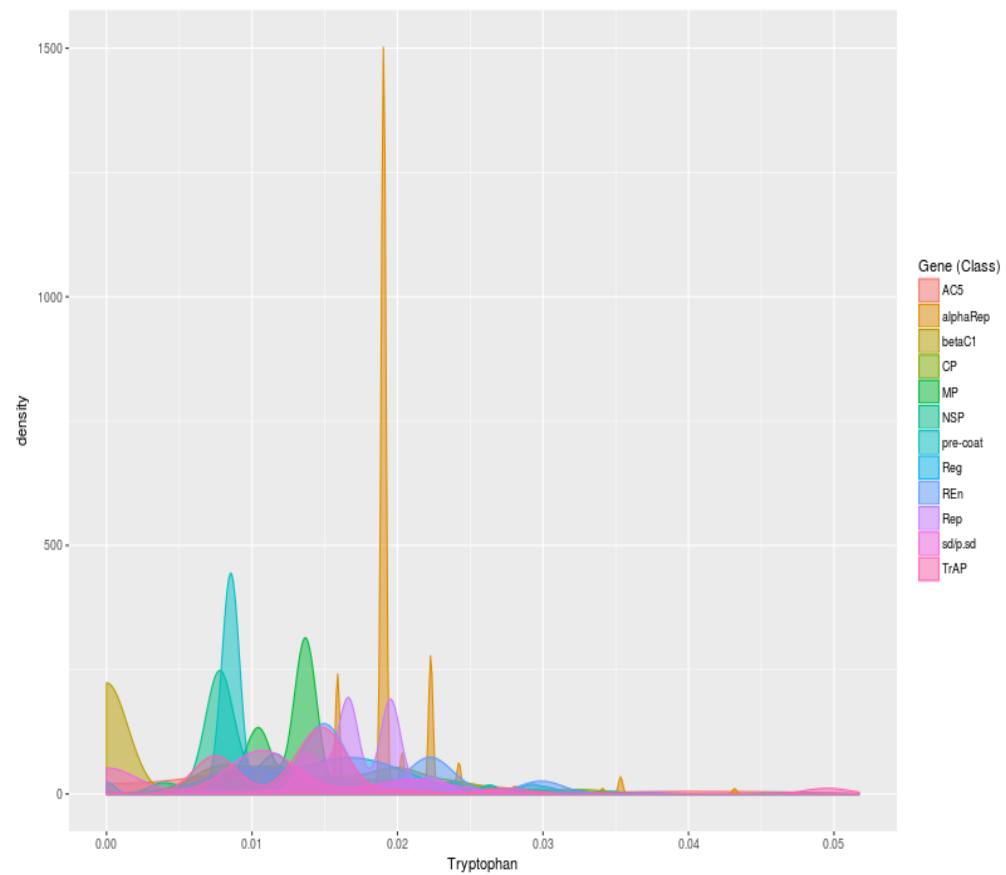

Boxplots

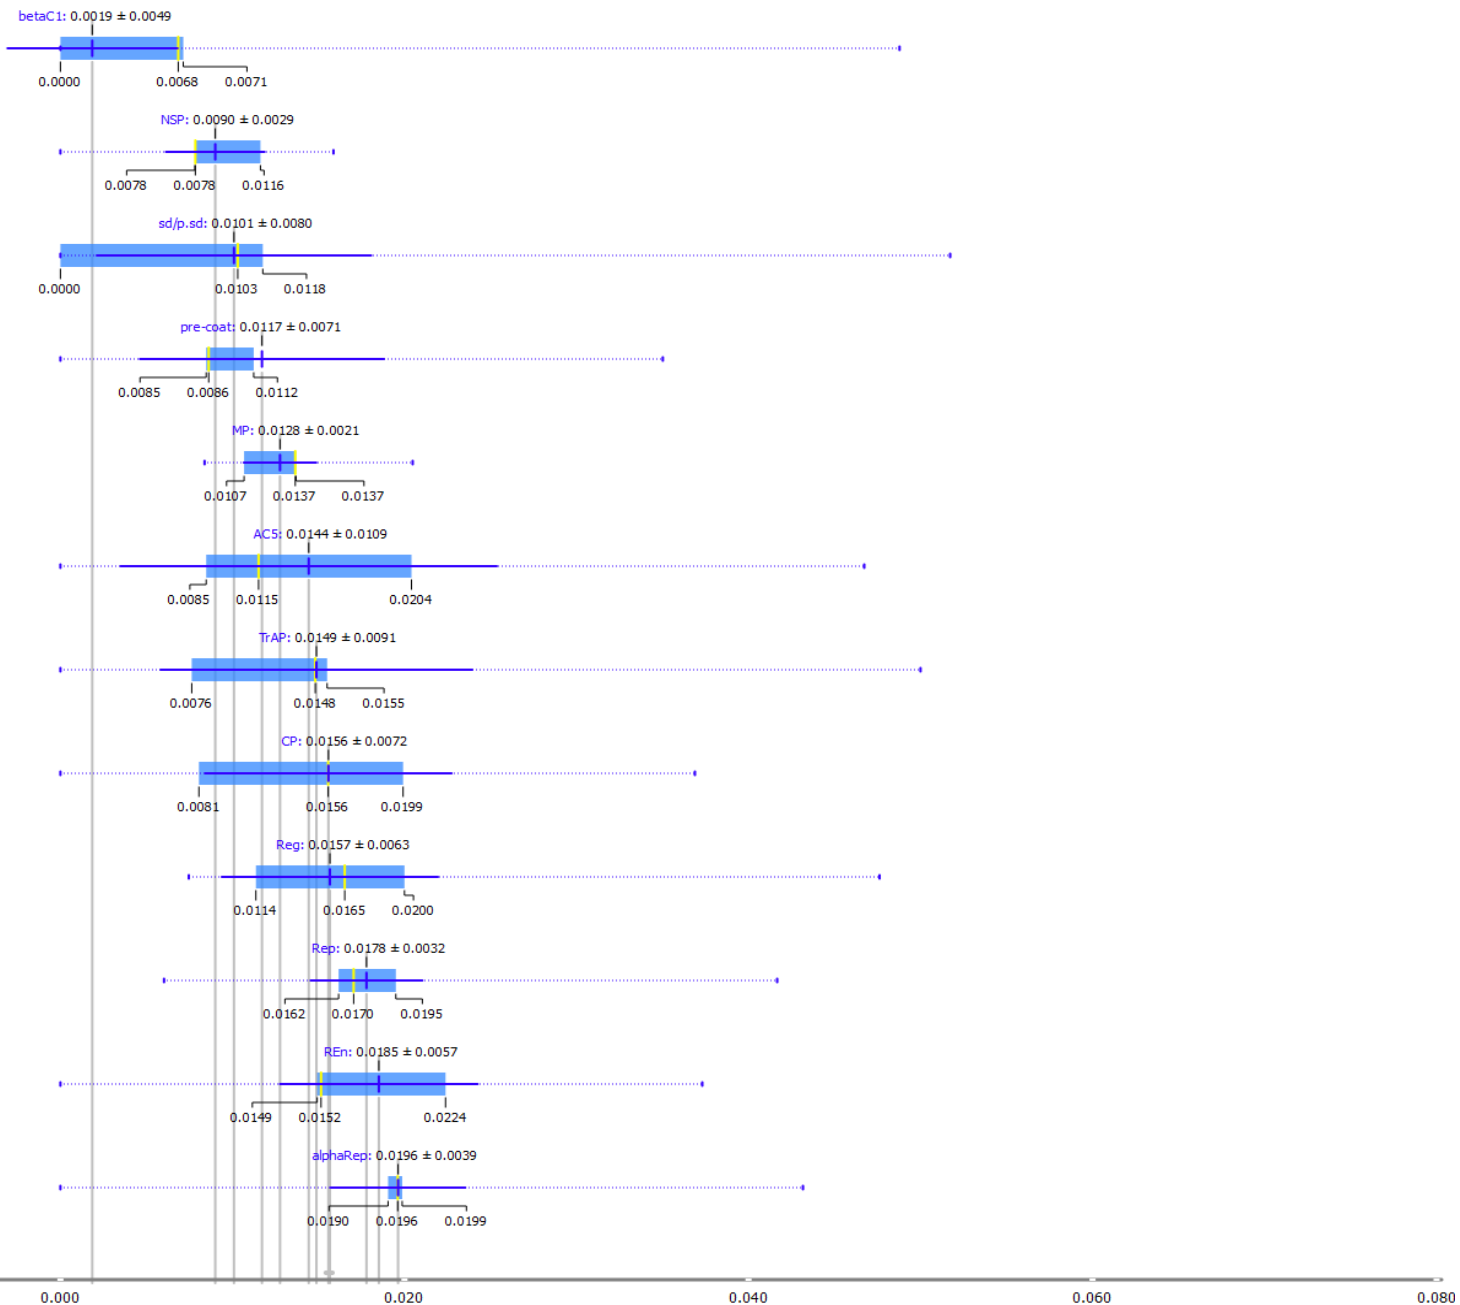

# Proportion of Tyrosine

Histogram

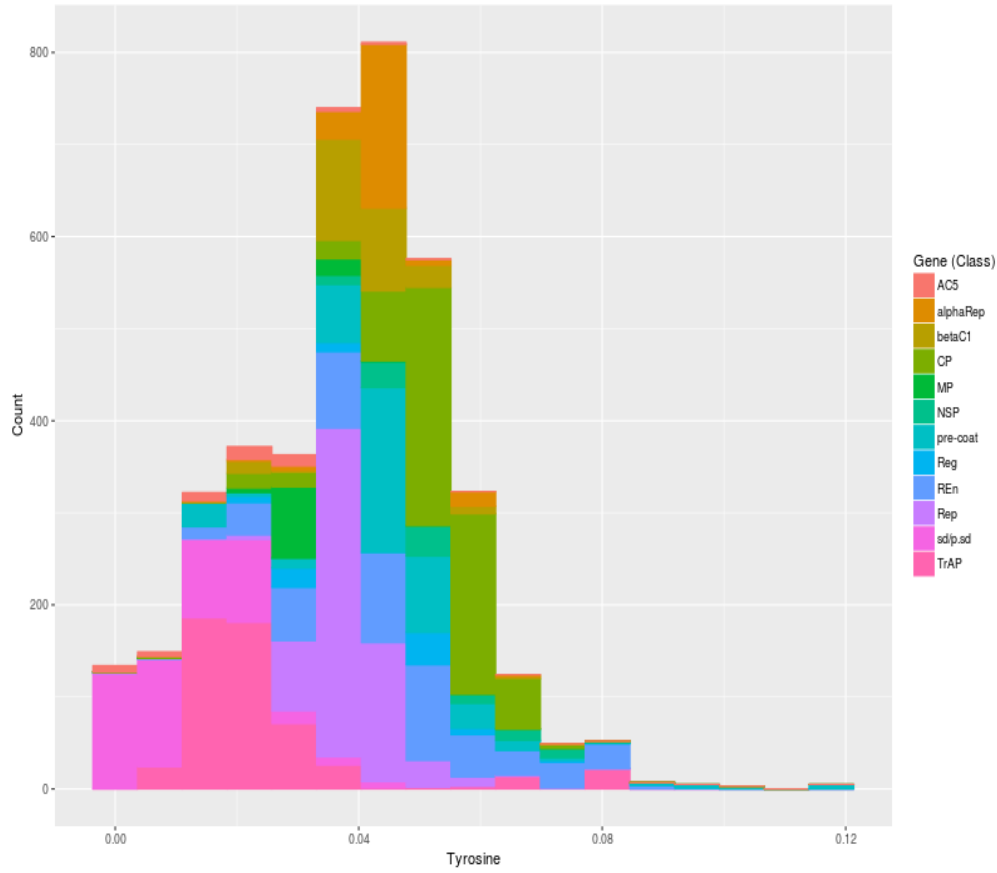

Density

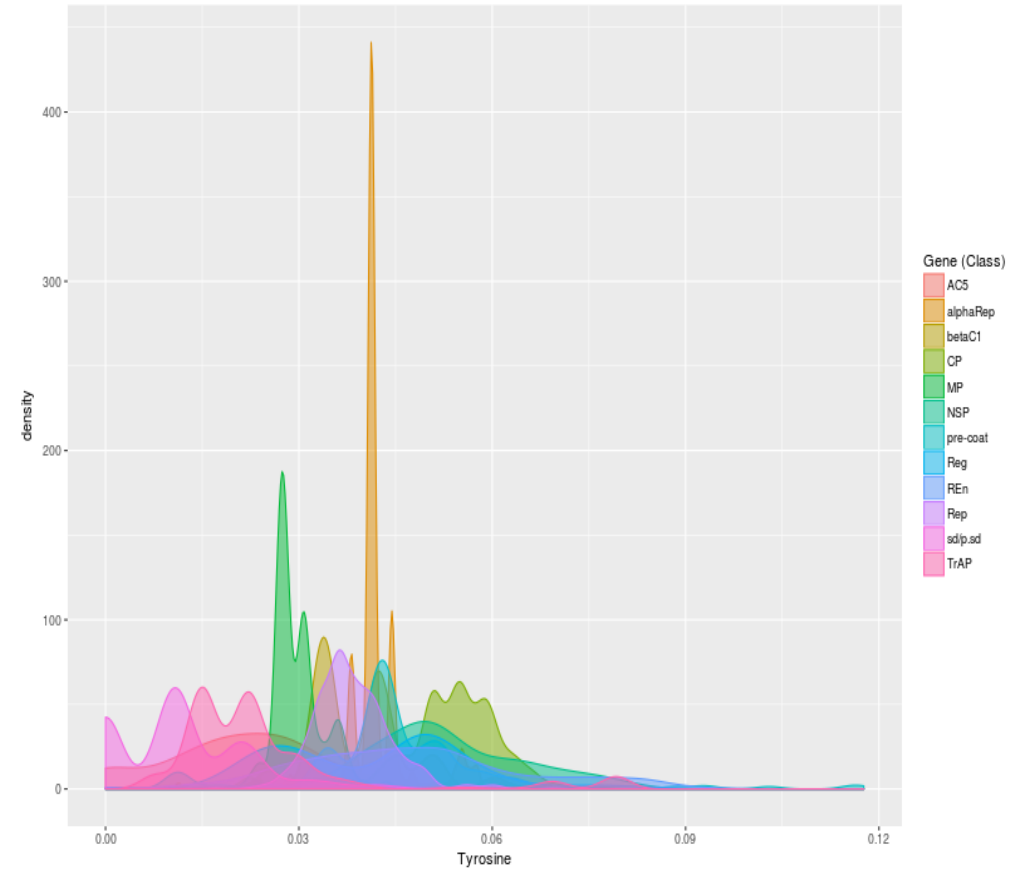



Boxplots

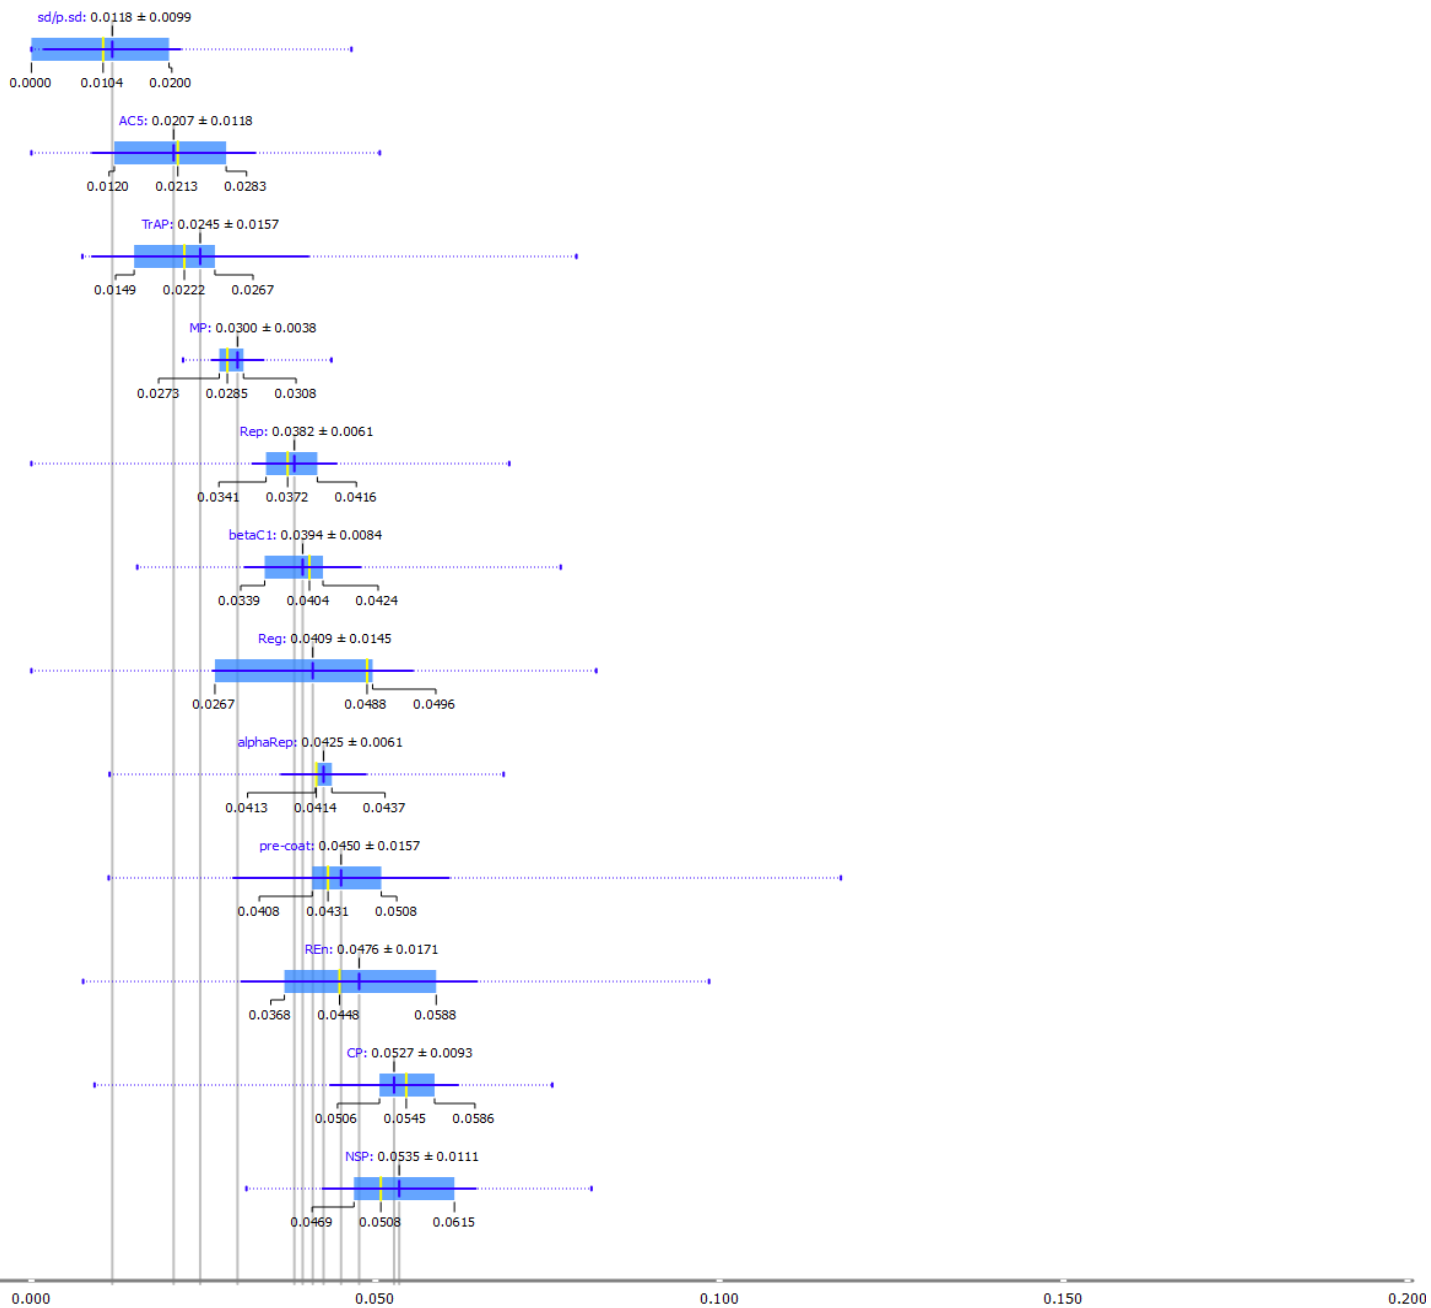



Boxplots

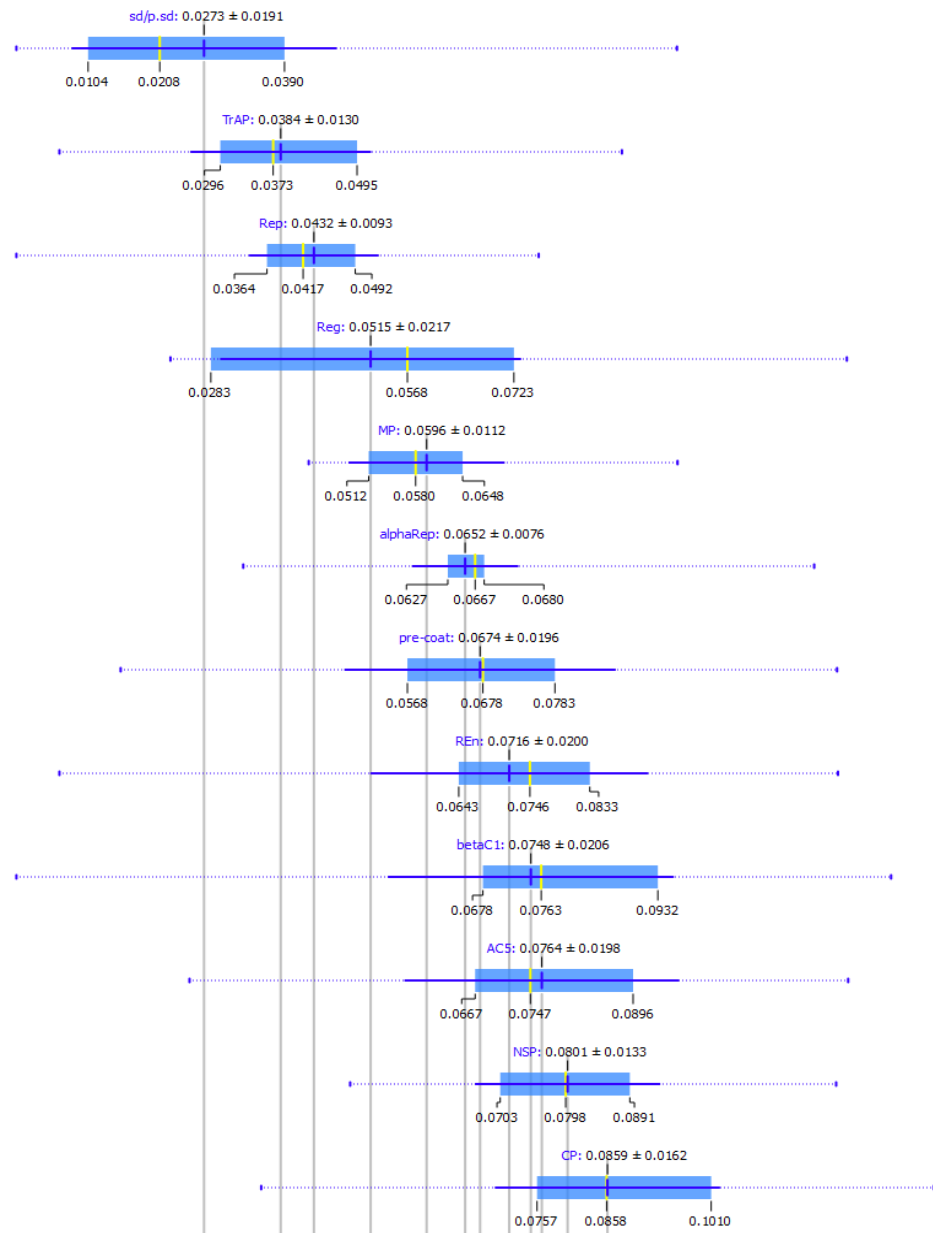

0.050 0.000 0.050 0.100 0.150 0.200
